# Supplementary material for: Pharmacological and dietary-supplement treatments for autism spectrum disorder: a systematic review and network meta-analysis
Source: Mol Autism. 2022 Mar 4;13:10. doi: 10.1186/s13229-022-00488-4 (PMC8896153; doi:10.1186/s13229-022-00488-4)

Social-communication difficulties

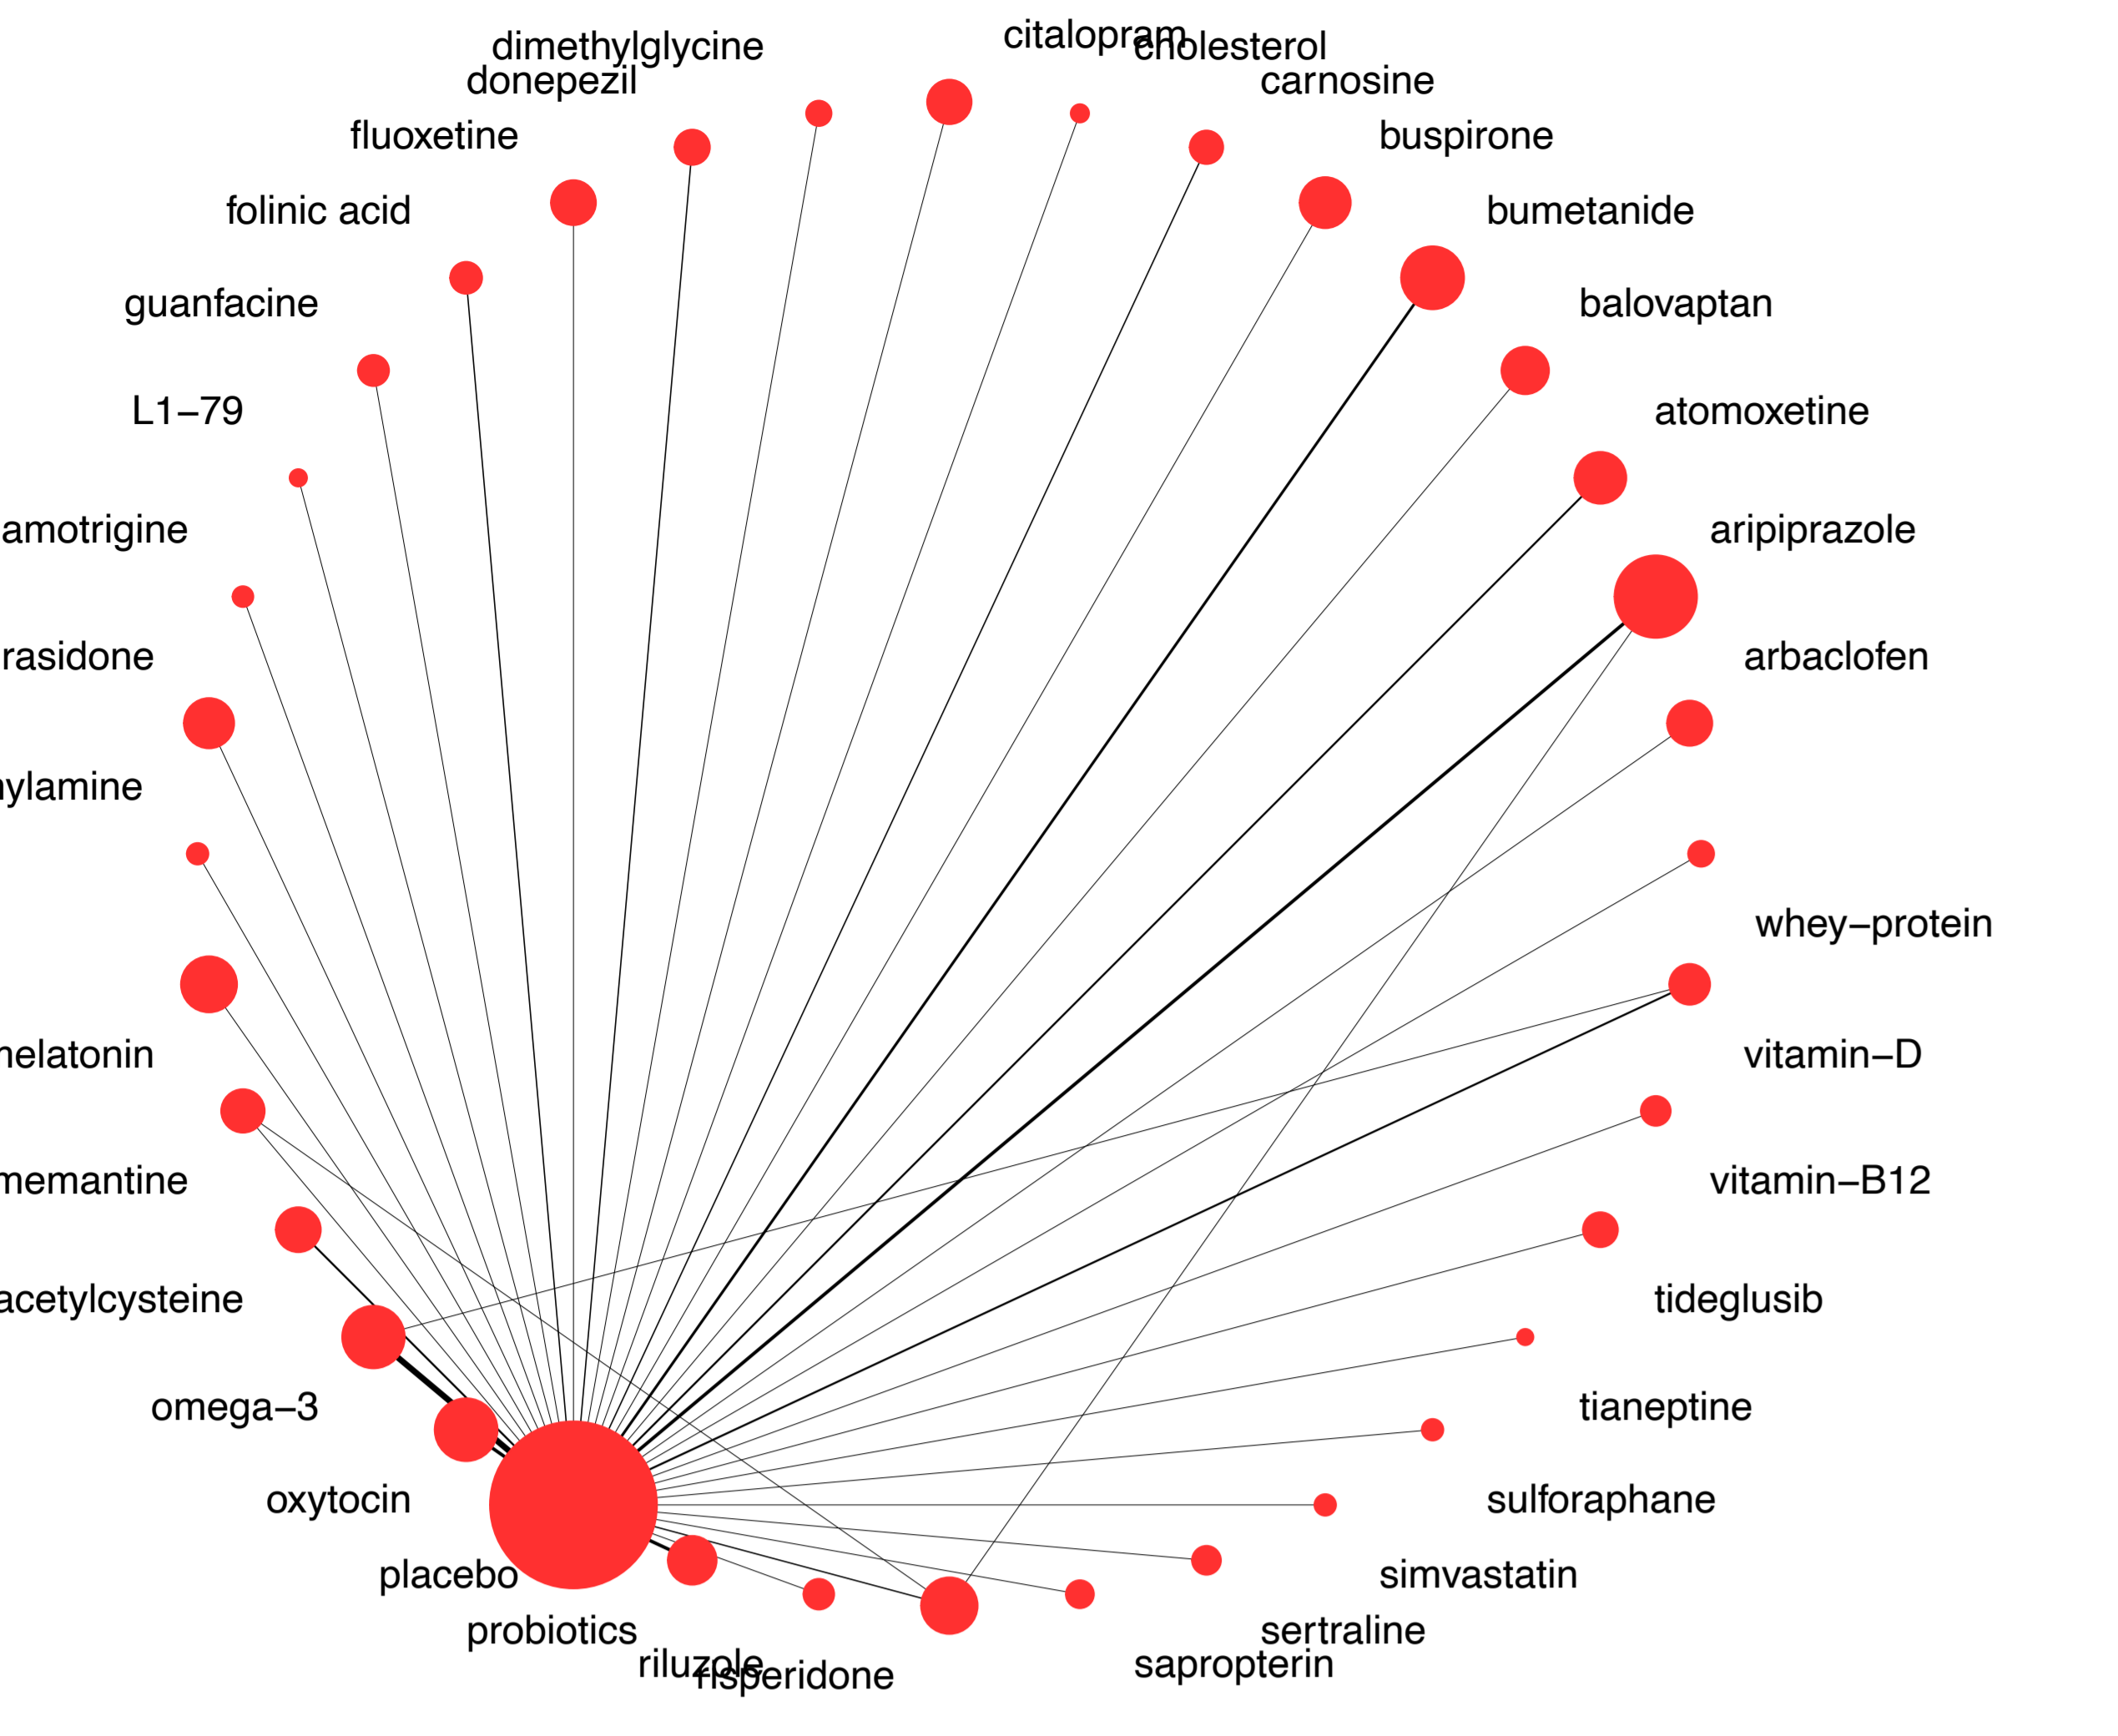

Repetitive behaviors

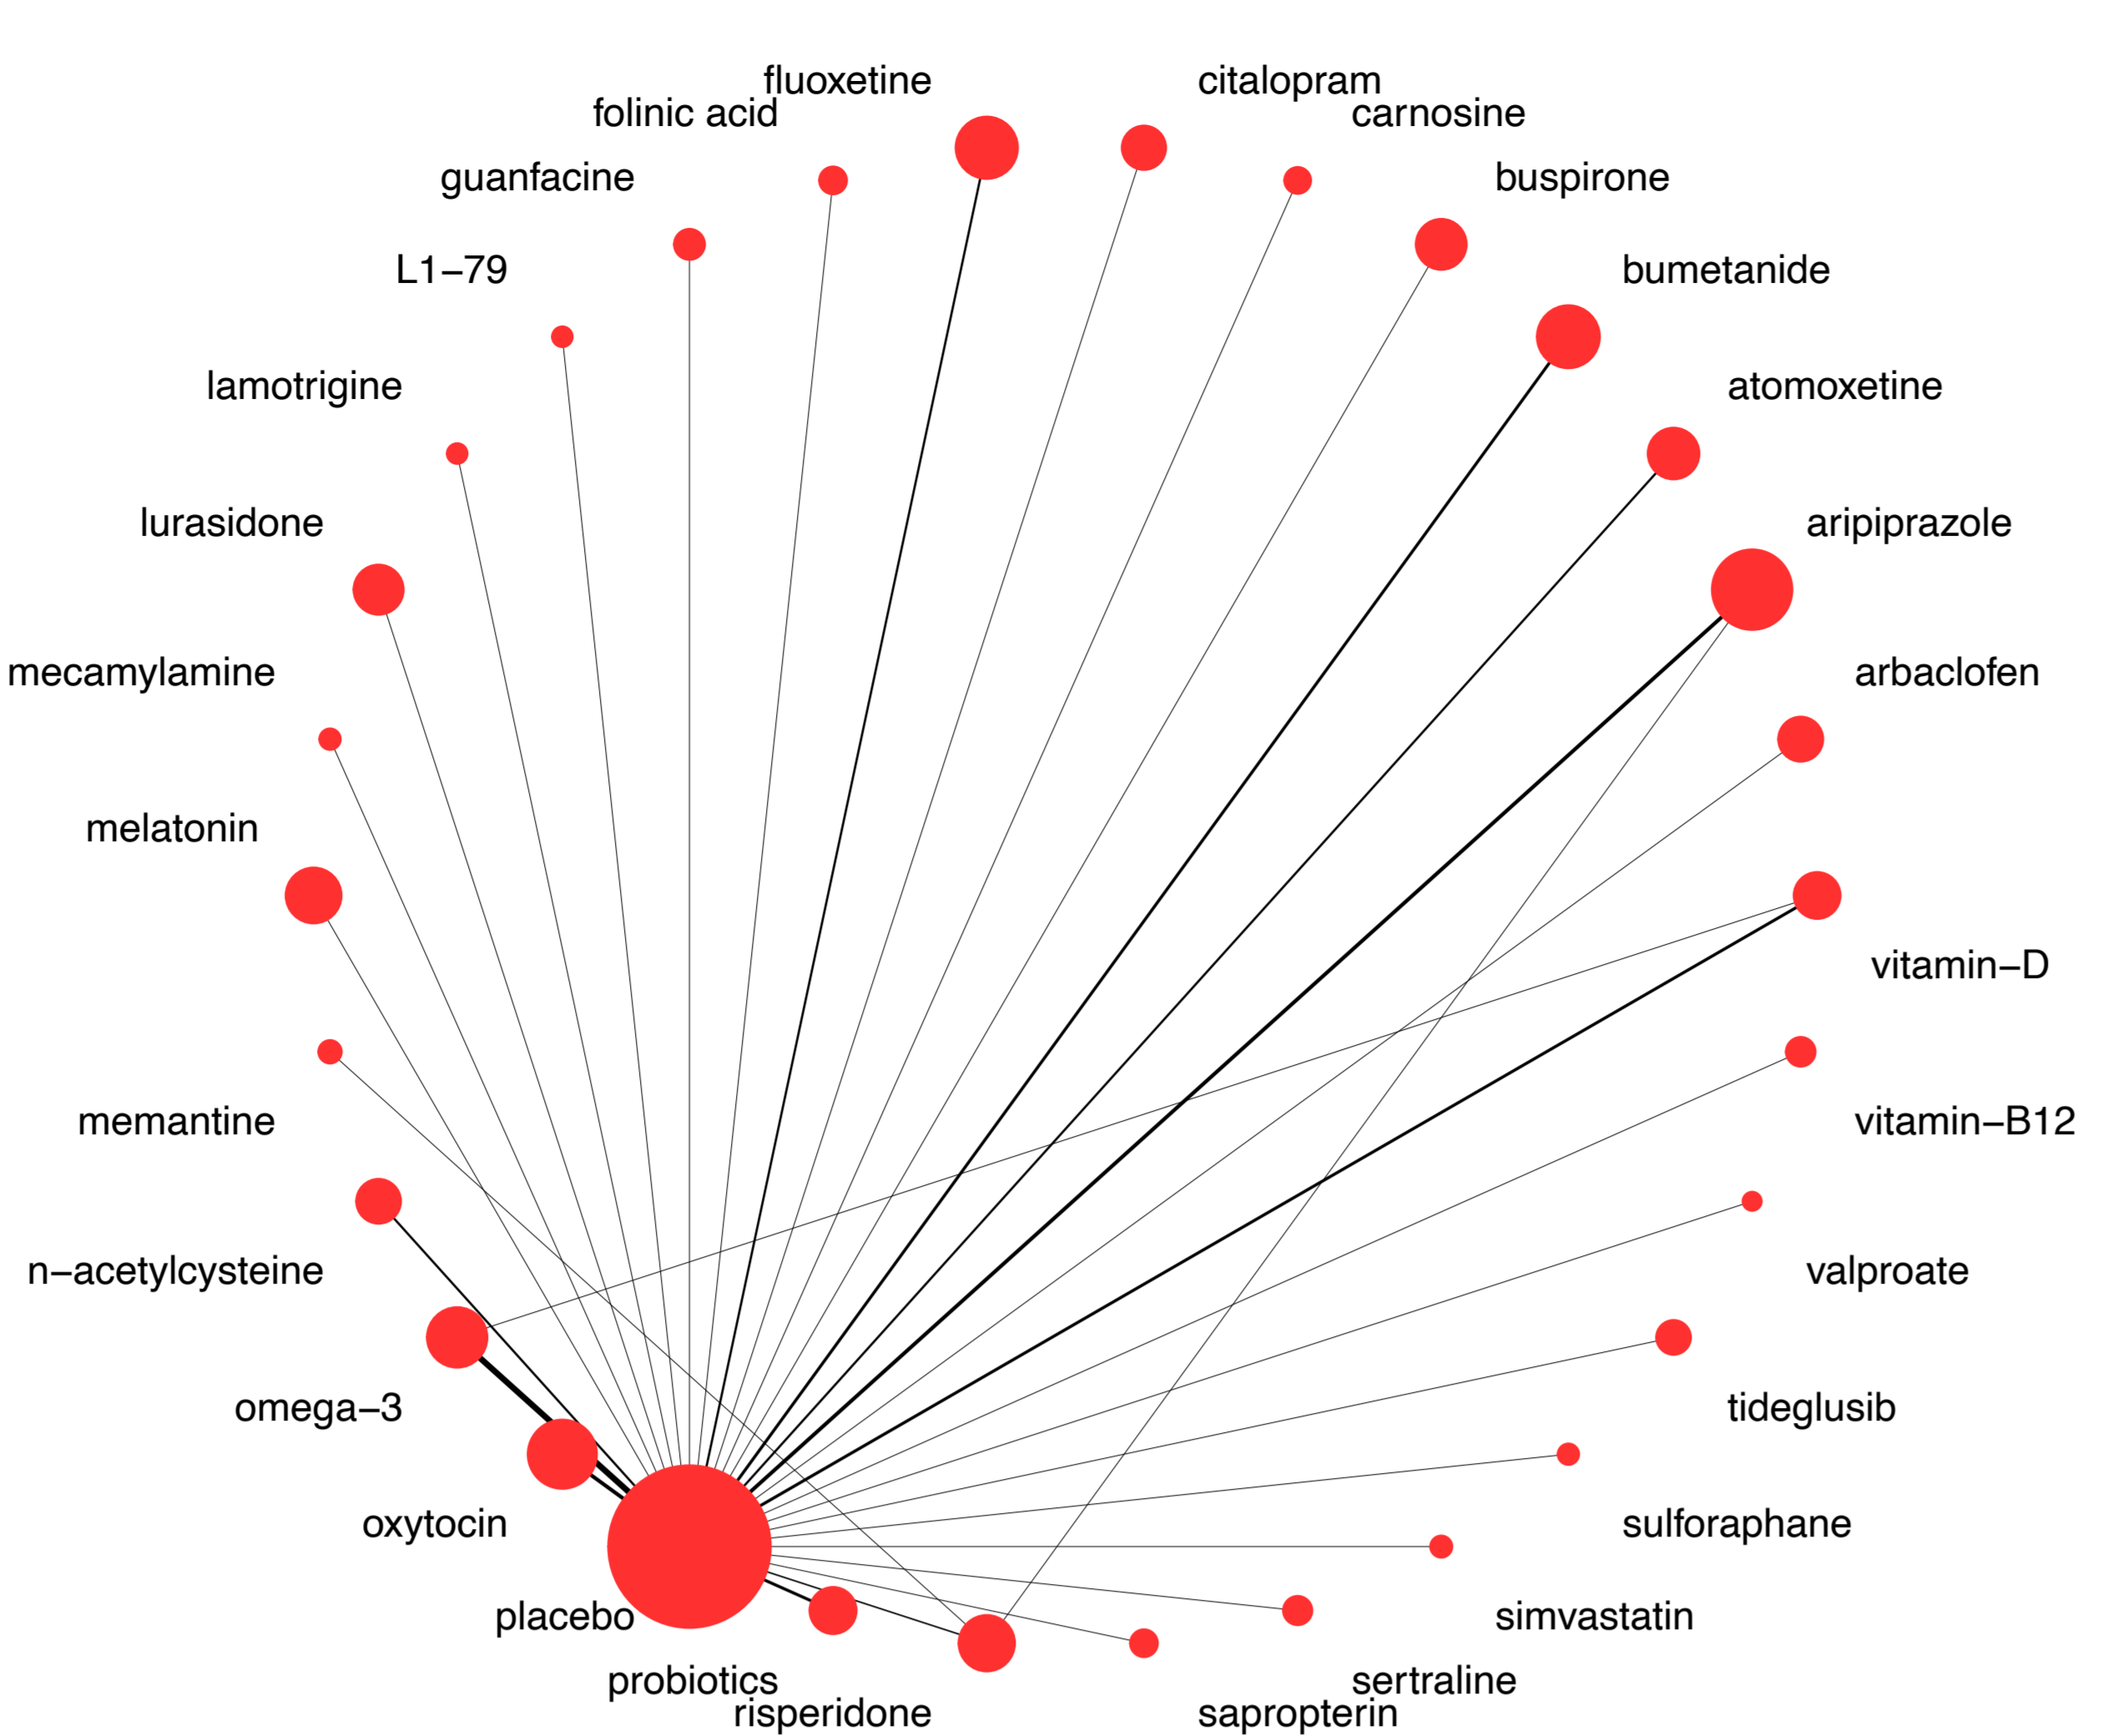

Overall core symptoms

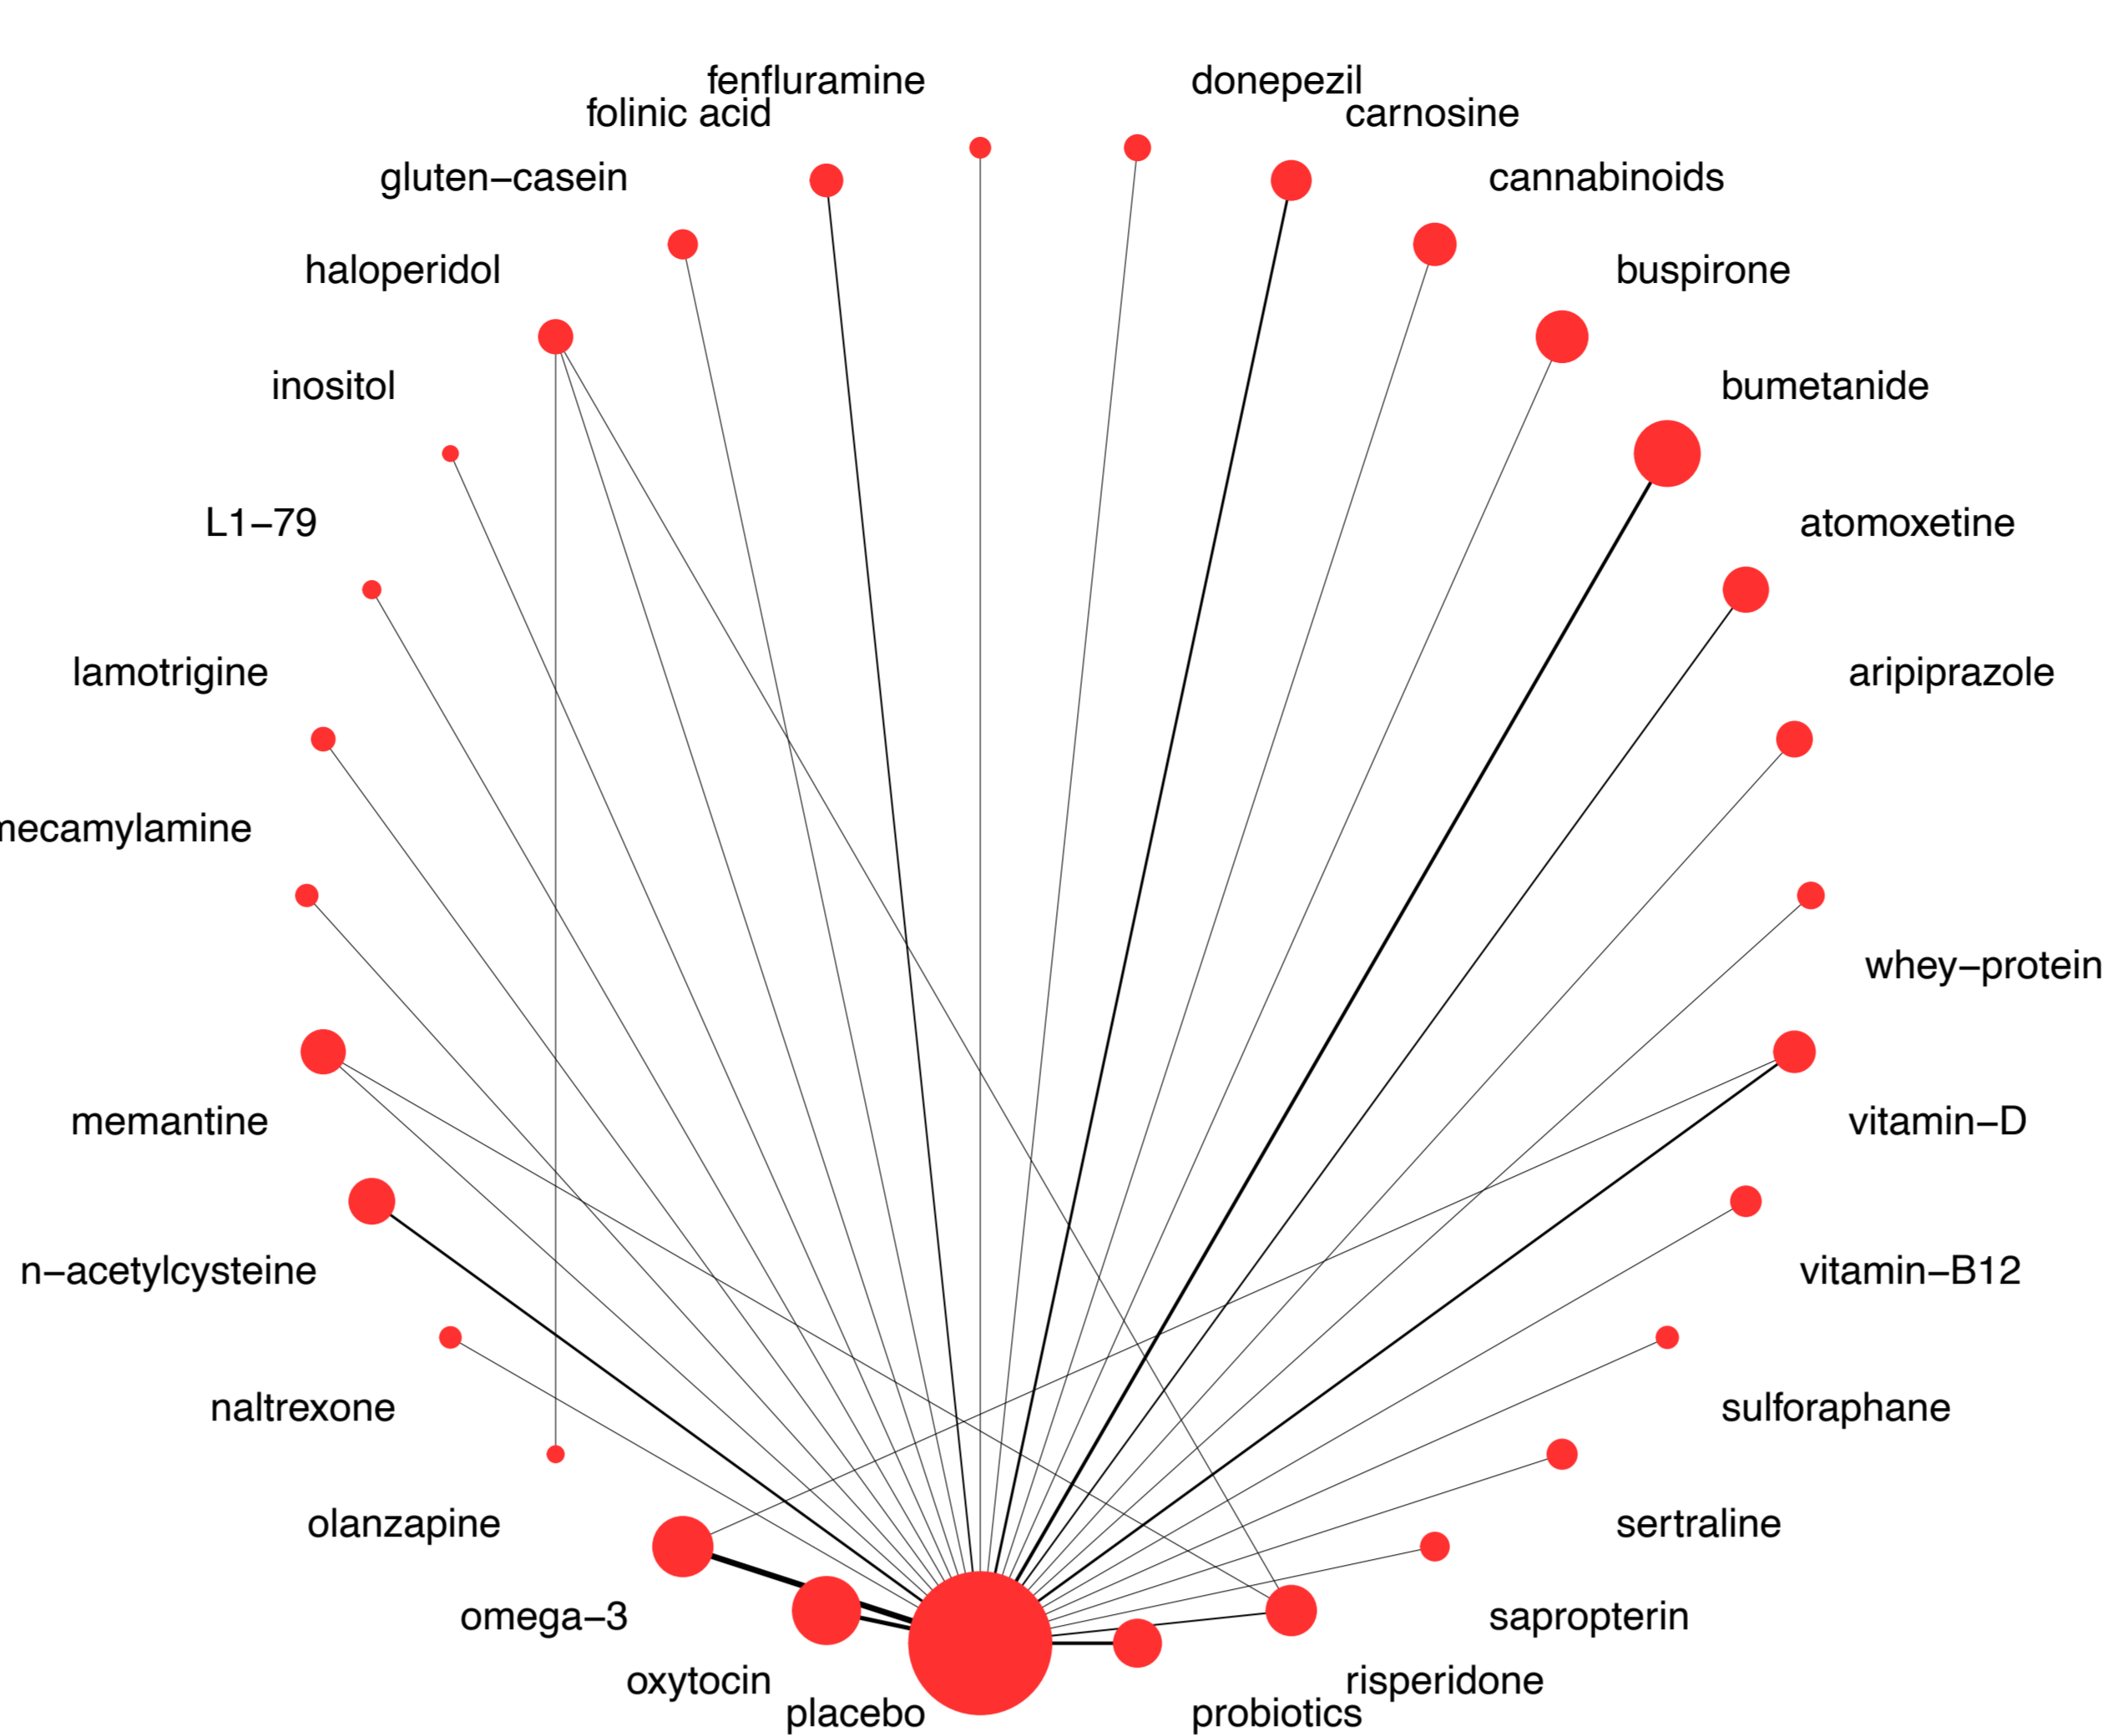

In overall core symptoms, the study of Nikvarz et al. 2017 that compared risperidone with memantine was excluded from the primary analysis, yet it is displayed in the network.

Irritability

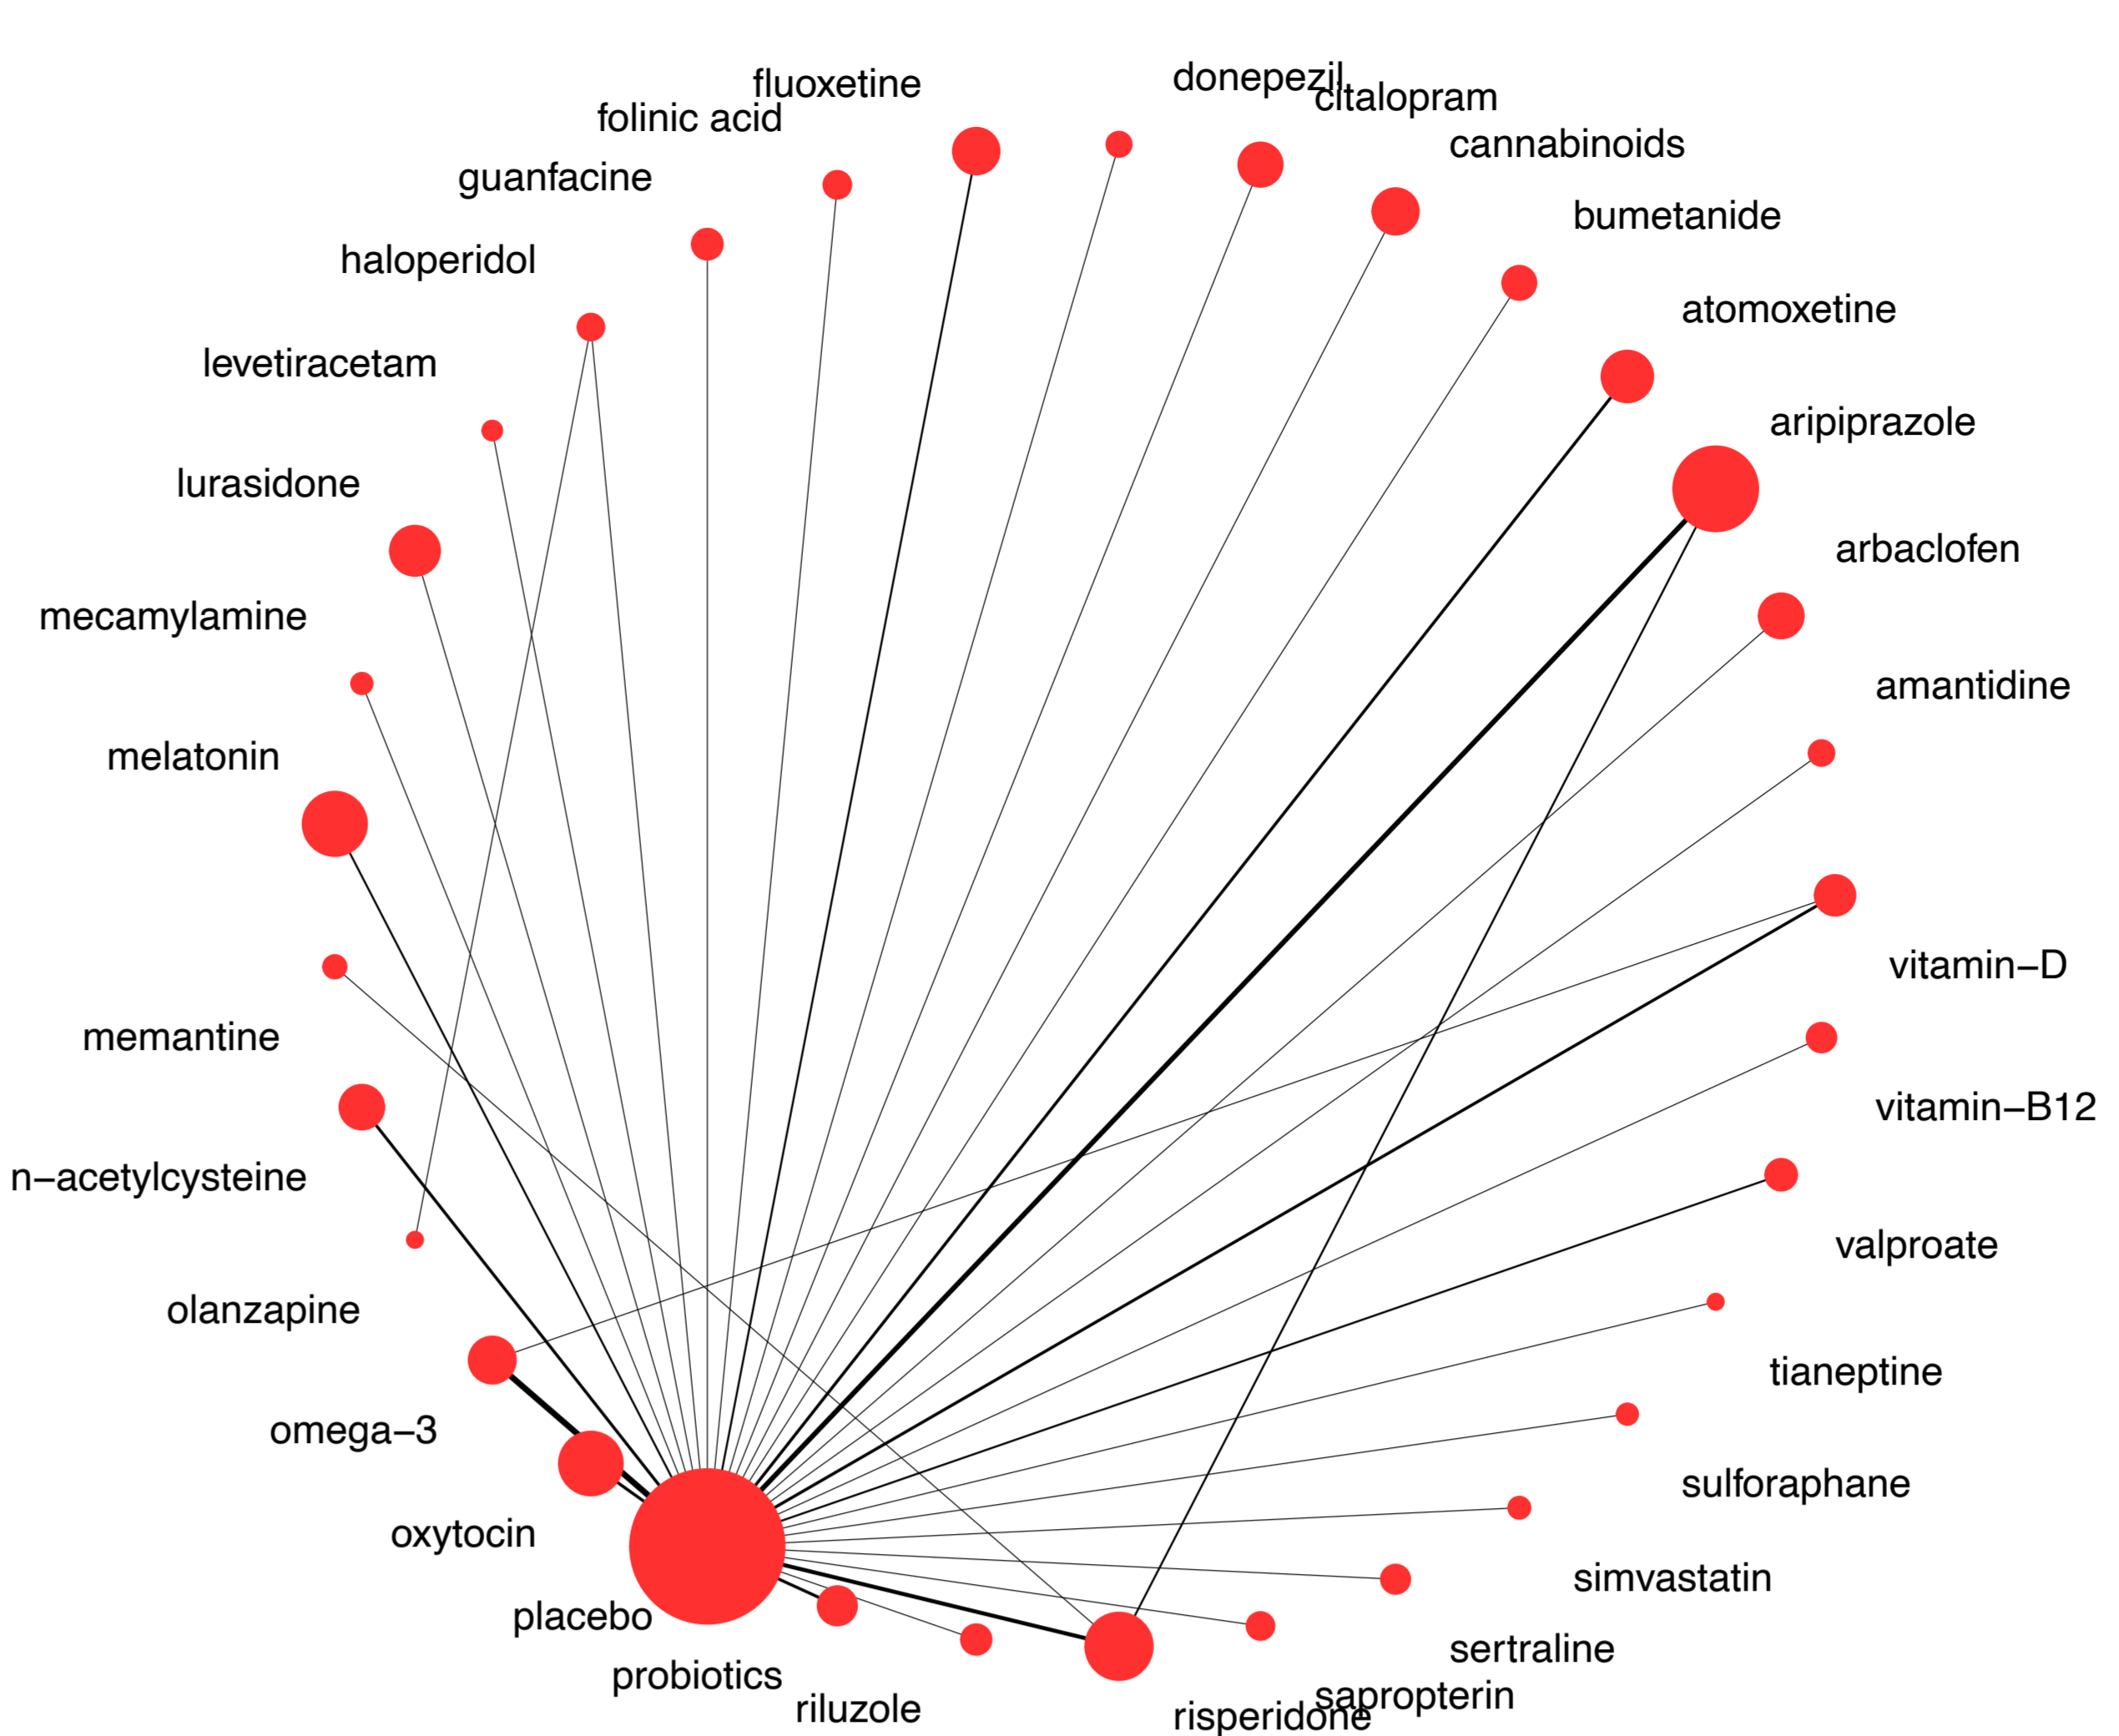

Pairwise meta-analysis was conducted for irritability, due to incoherence.

ADHD symptoms

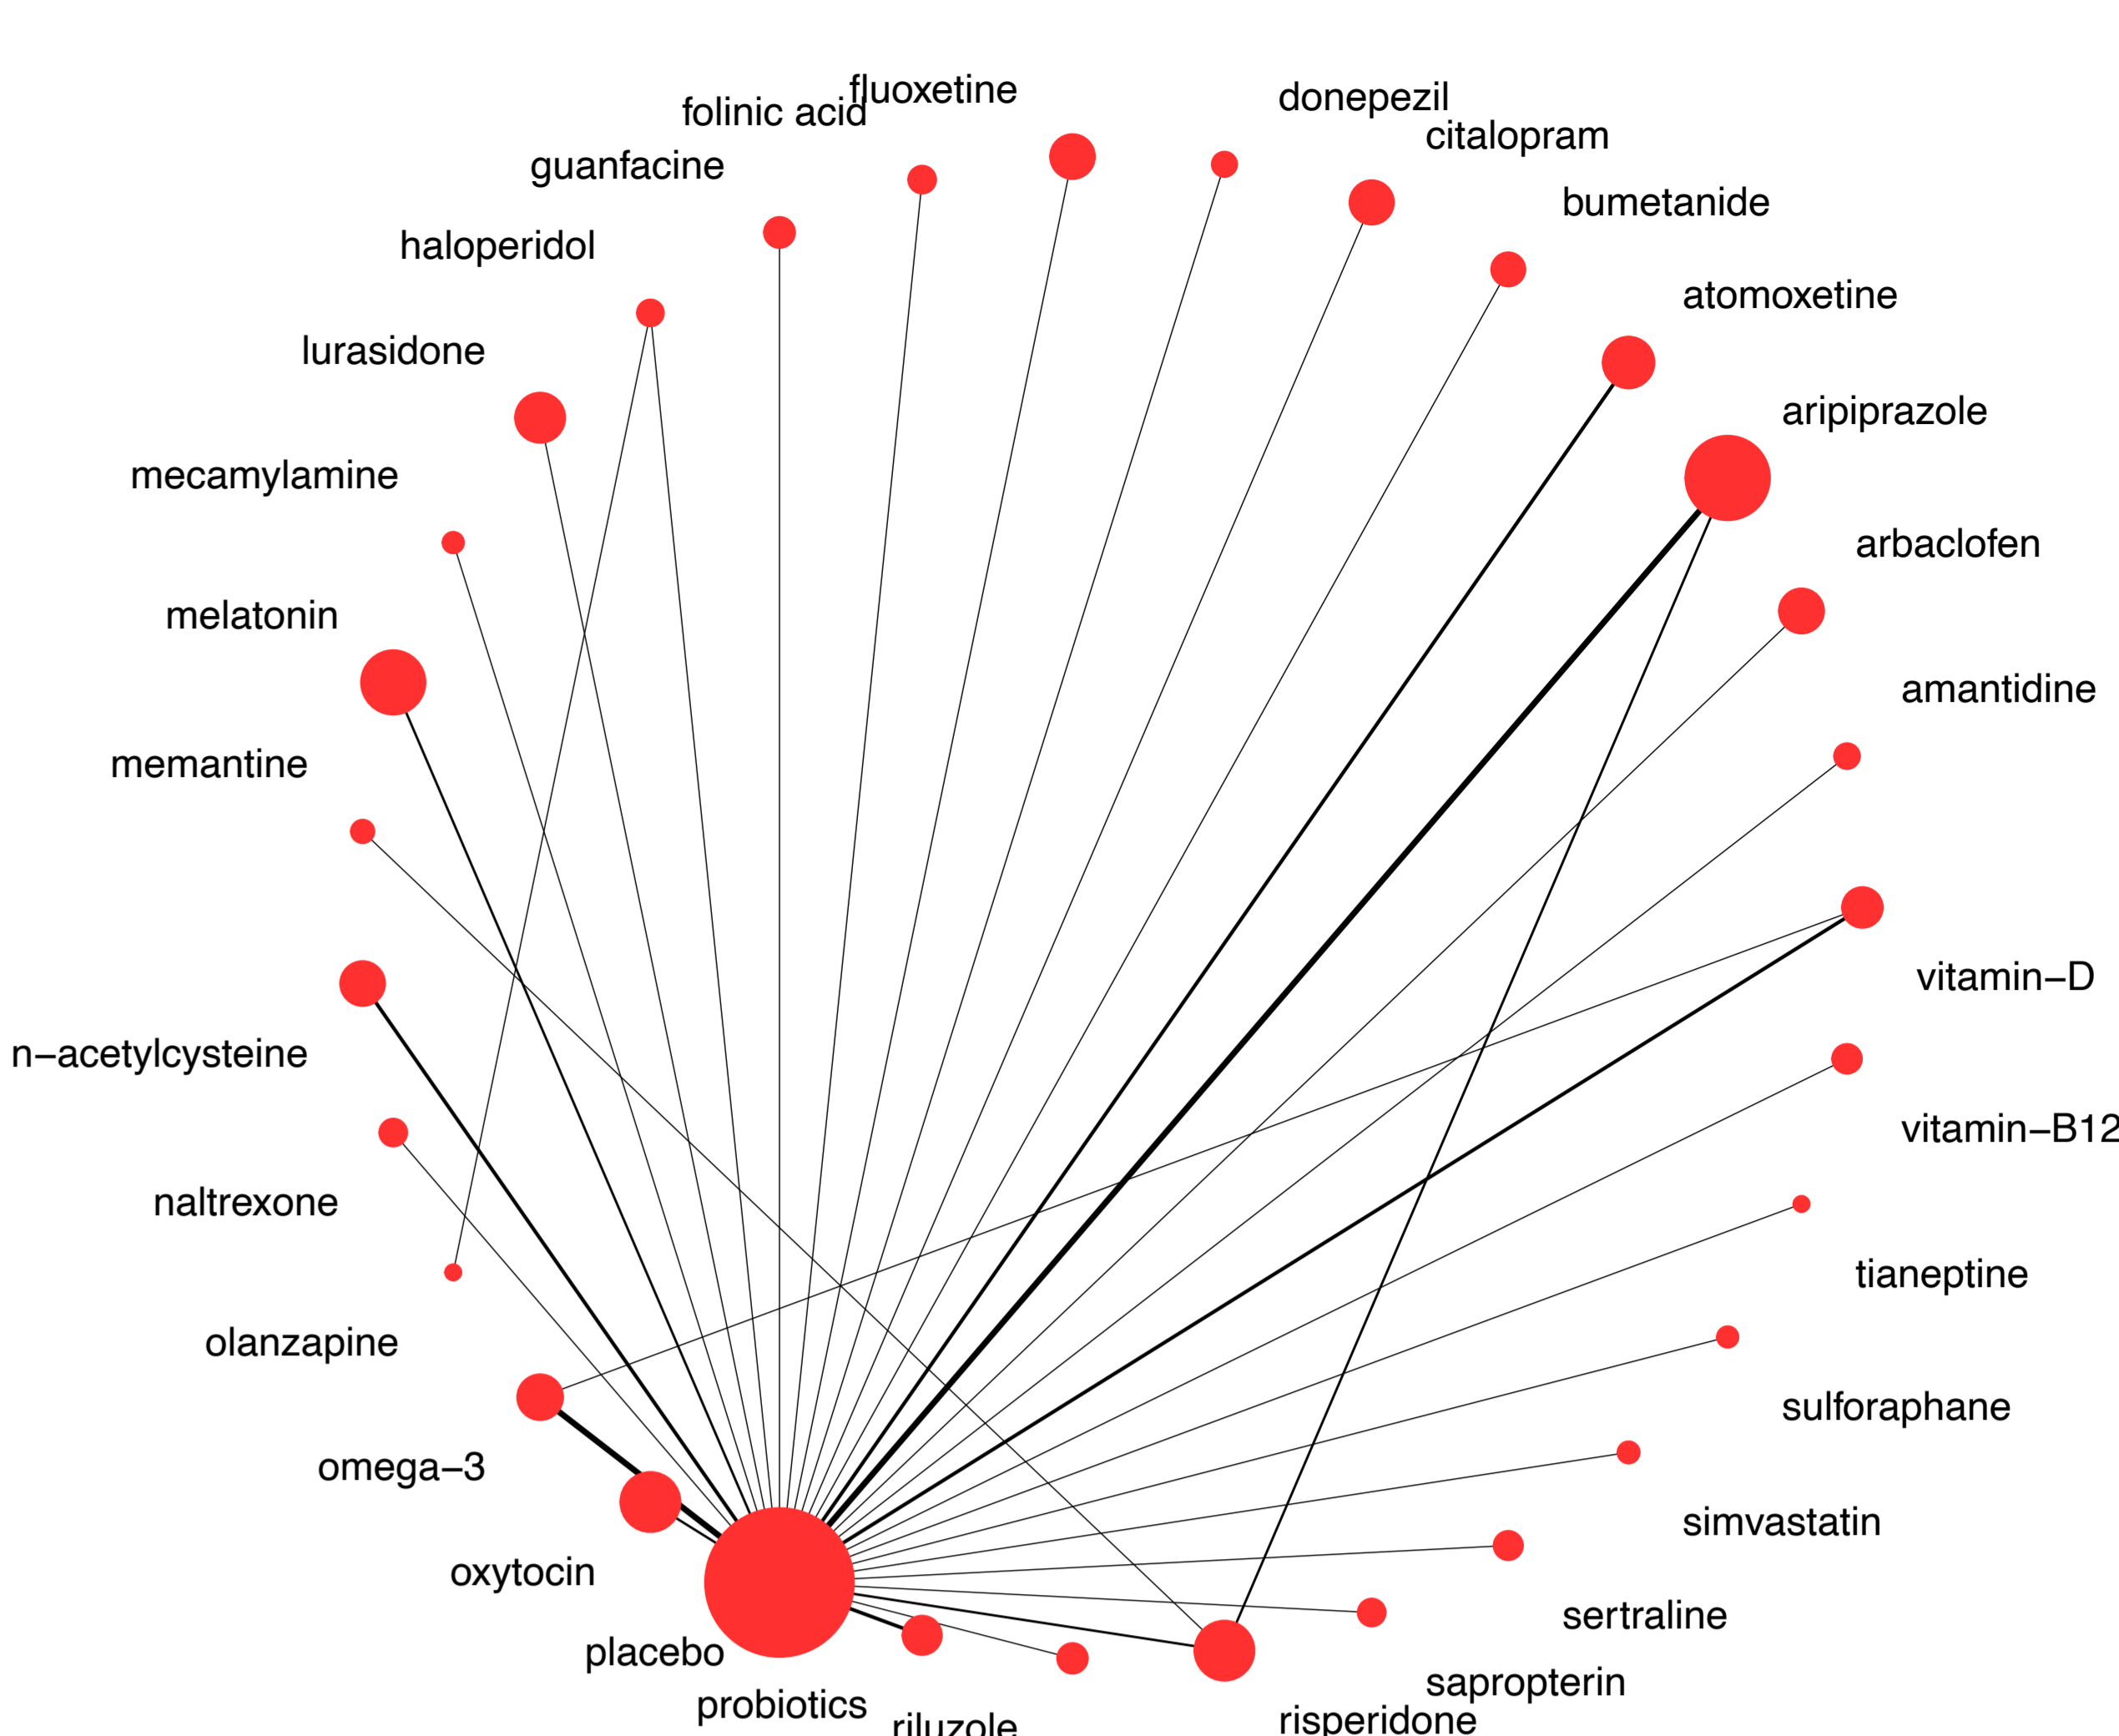

Anxiety/depressive symptoms

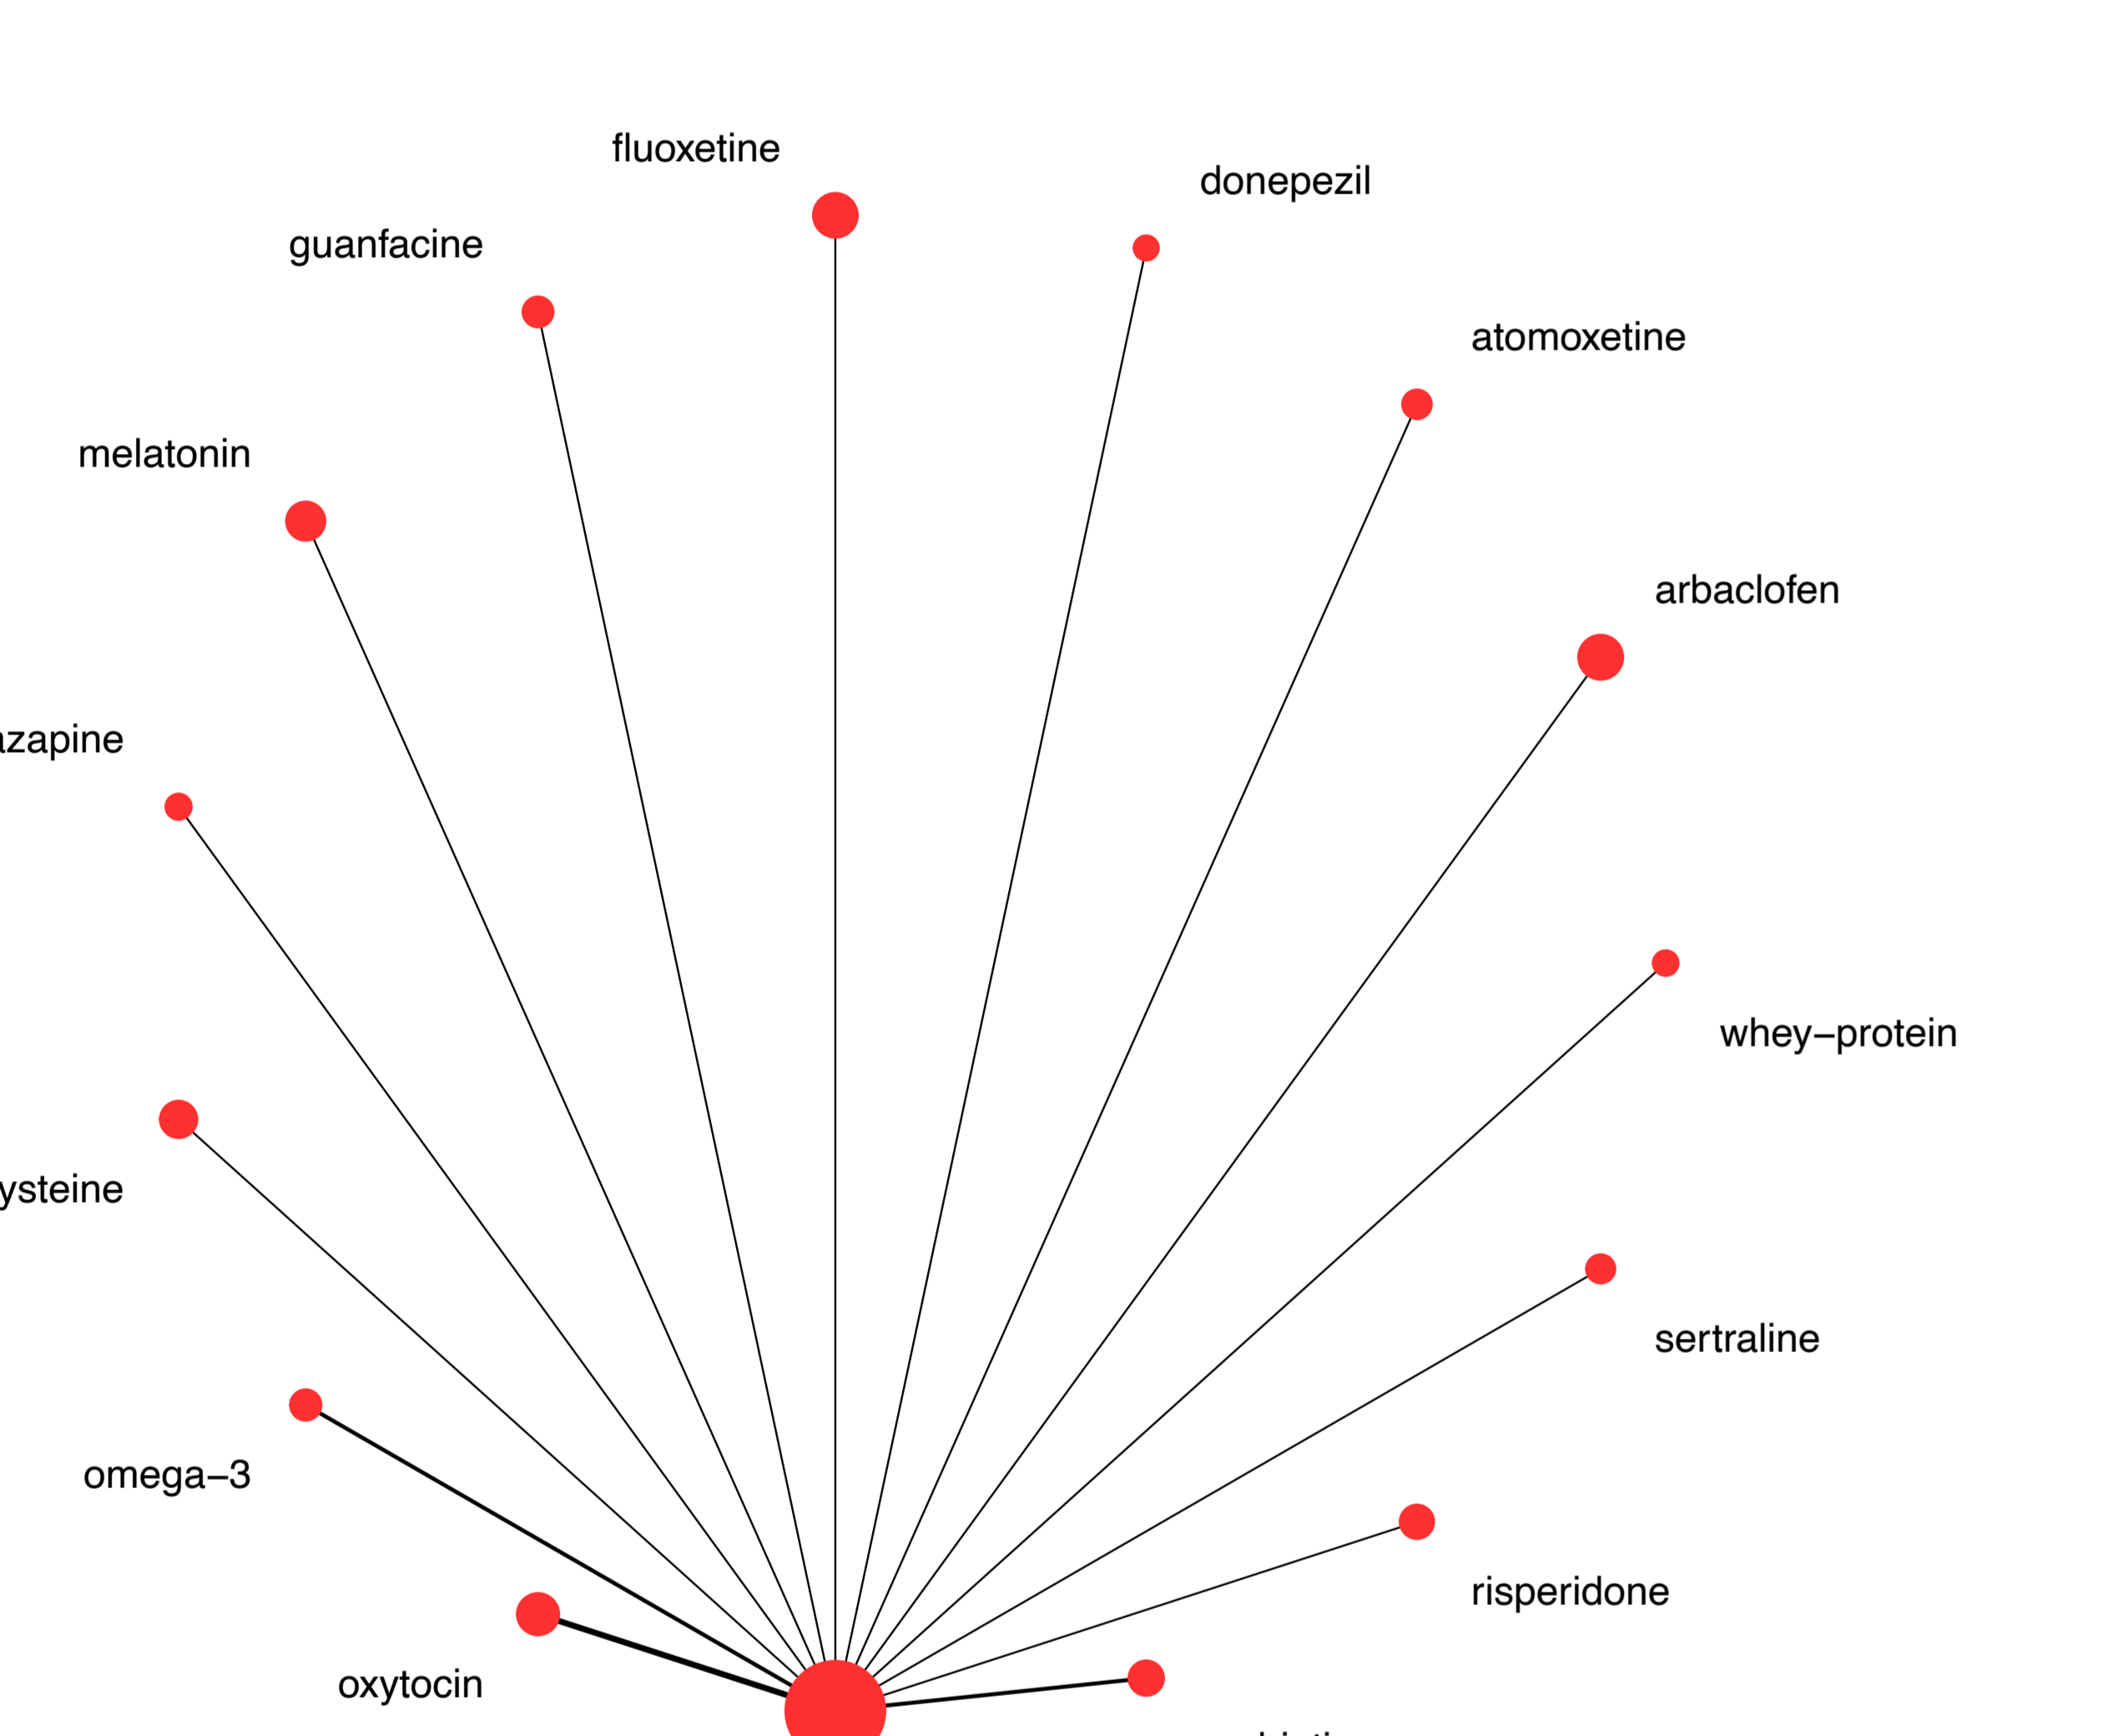

Caregiver stress

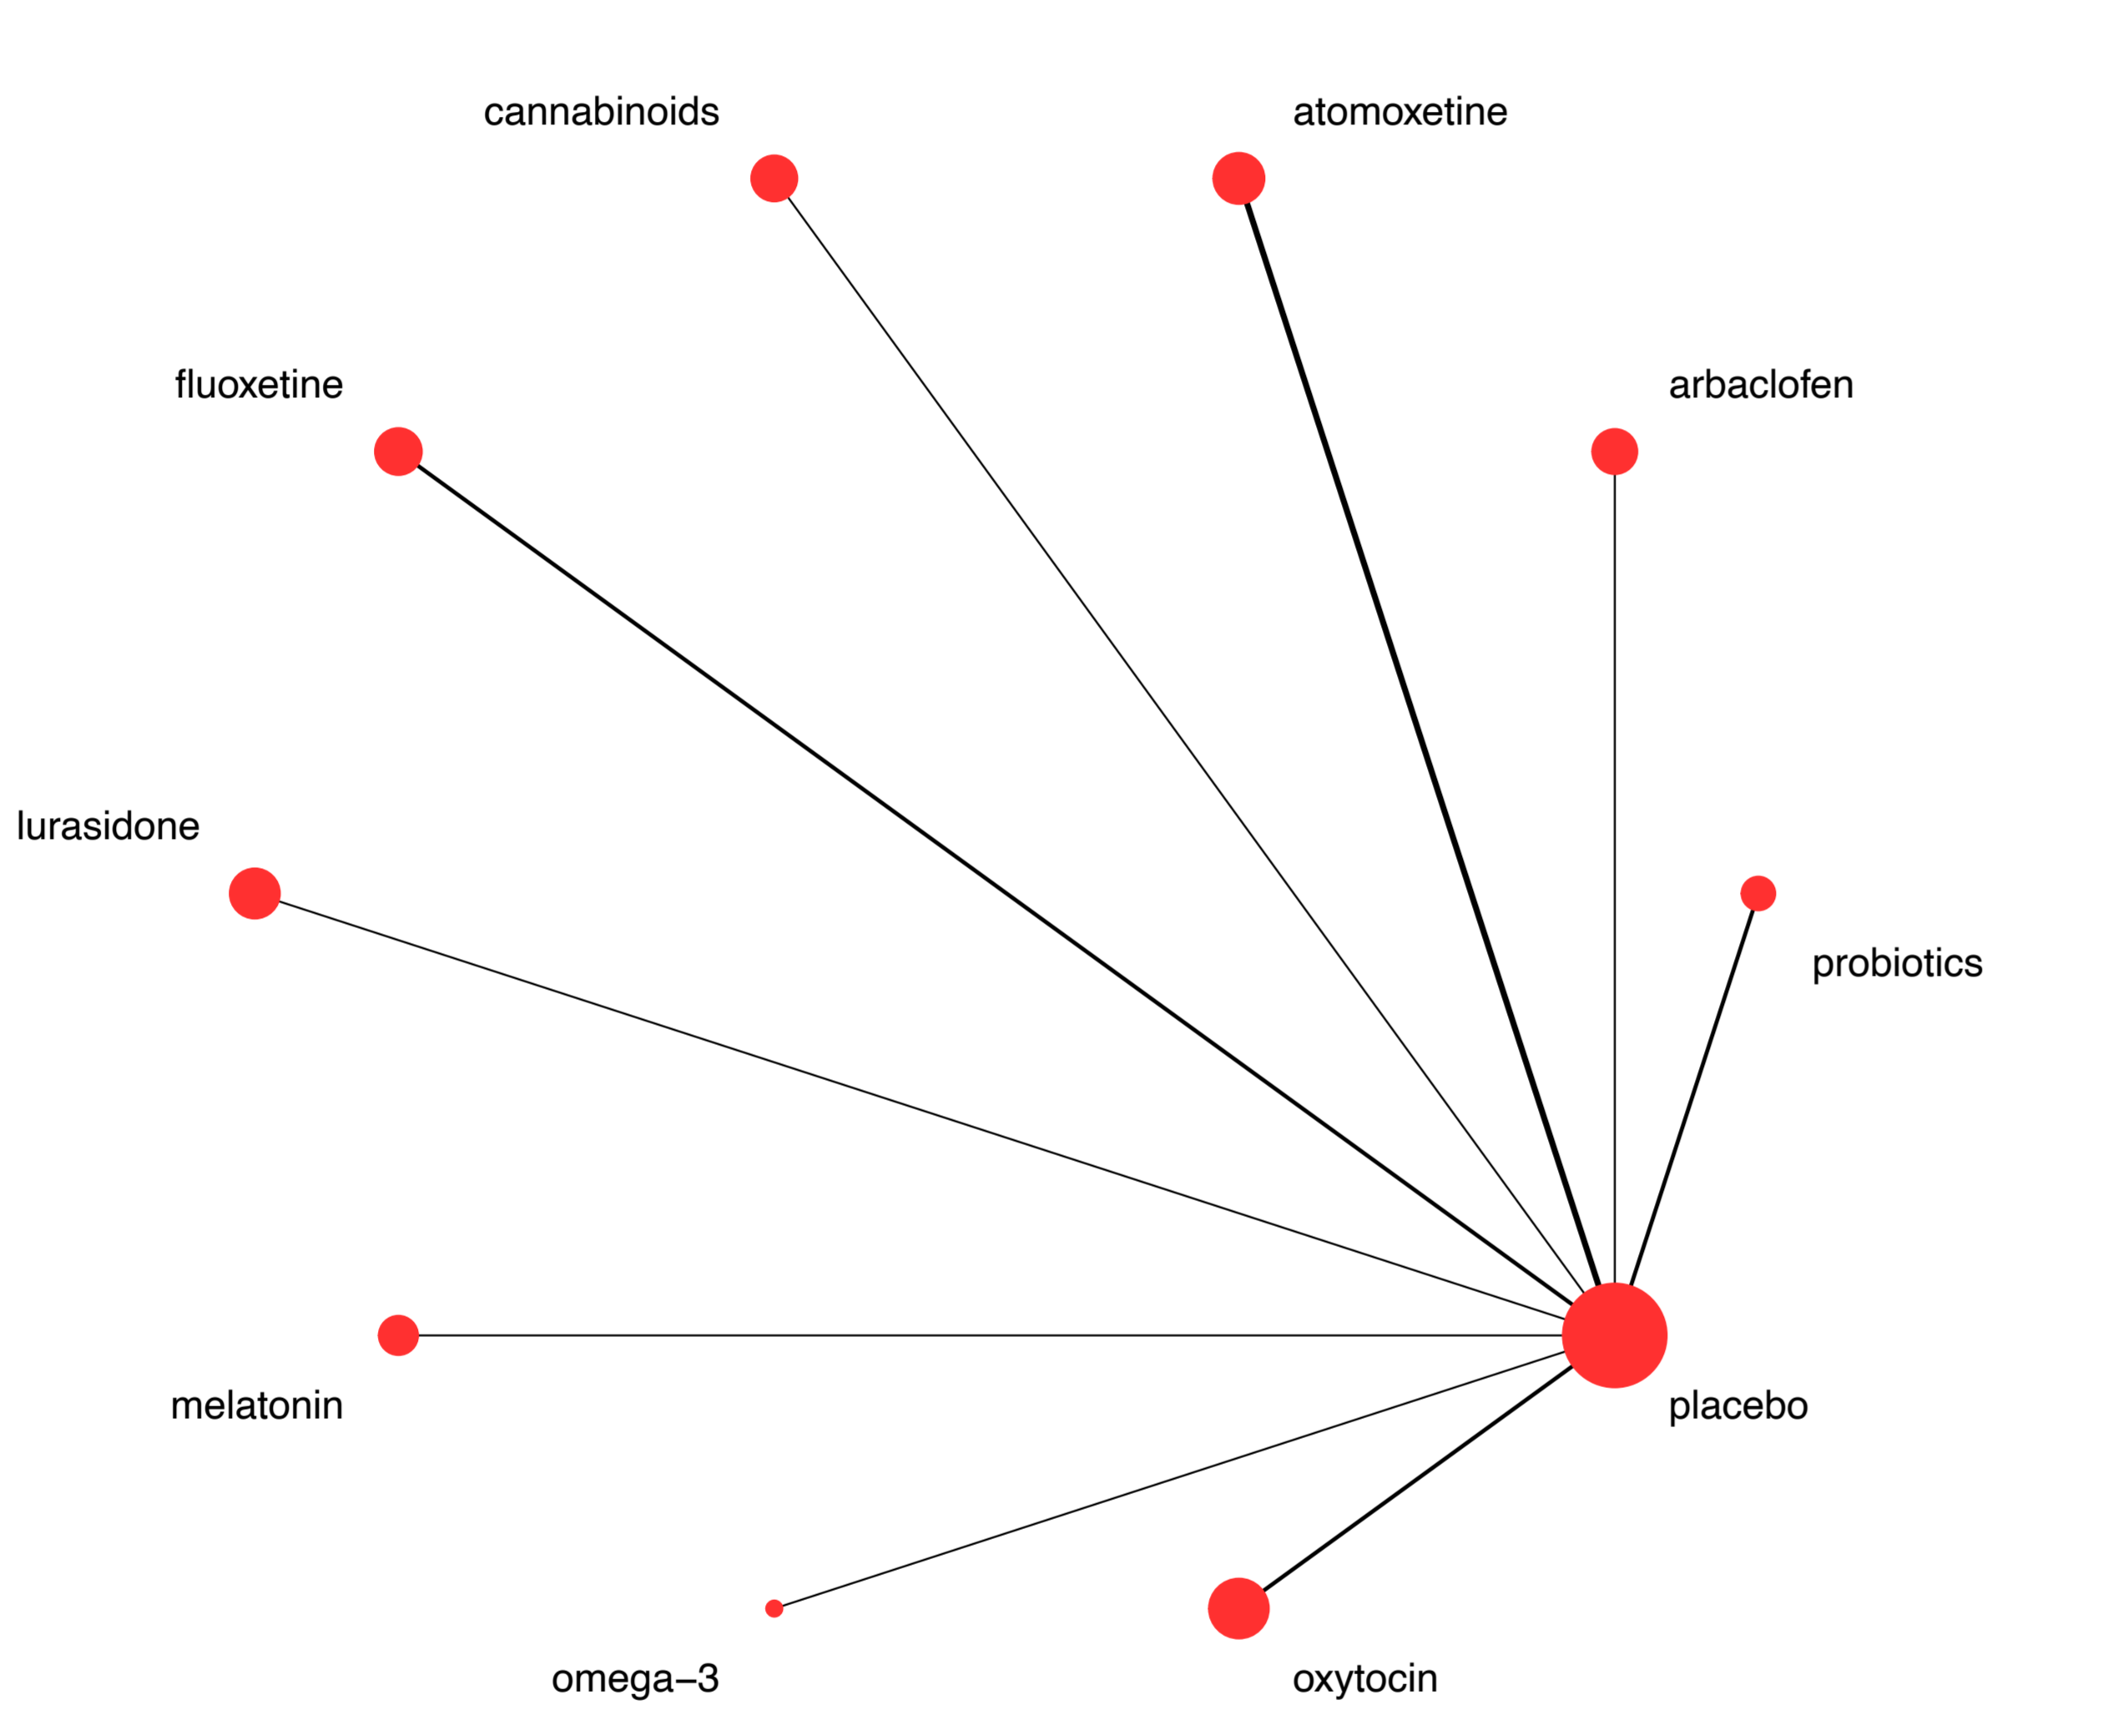

Quality of life

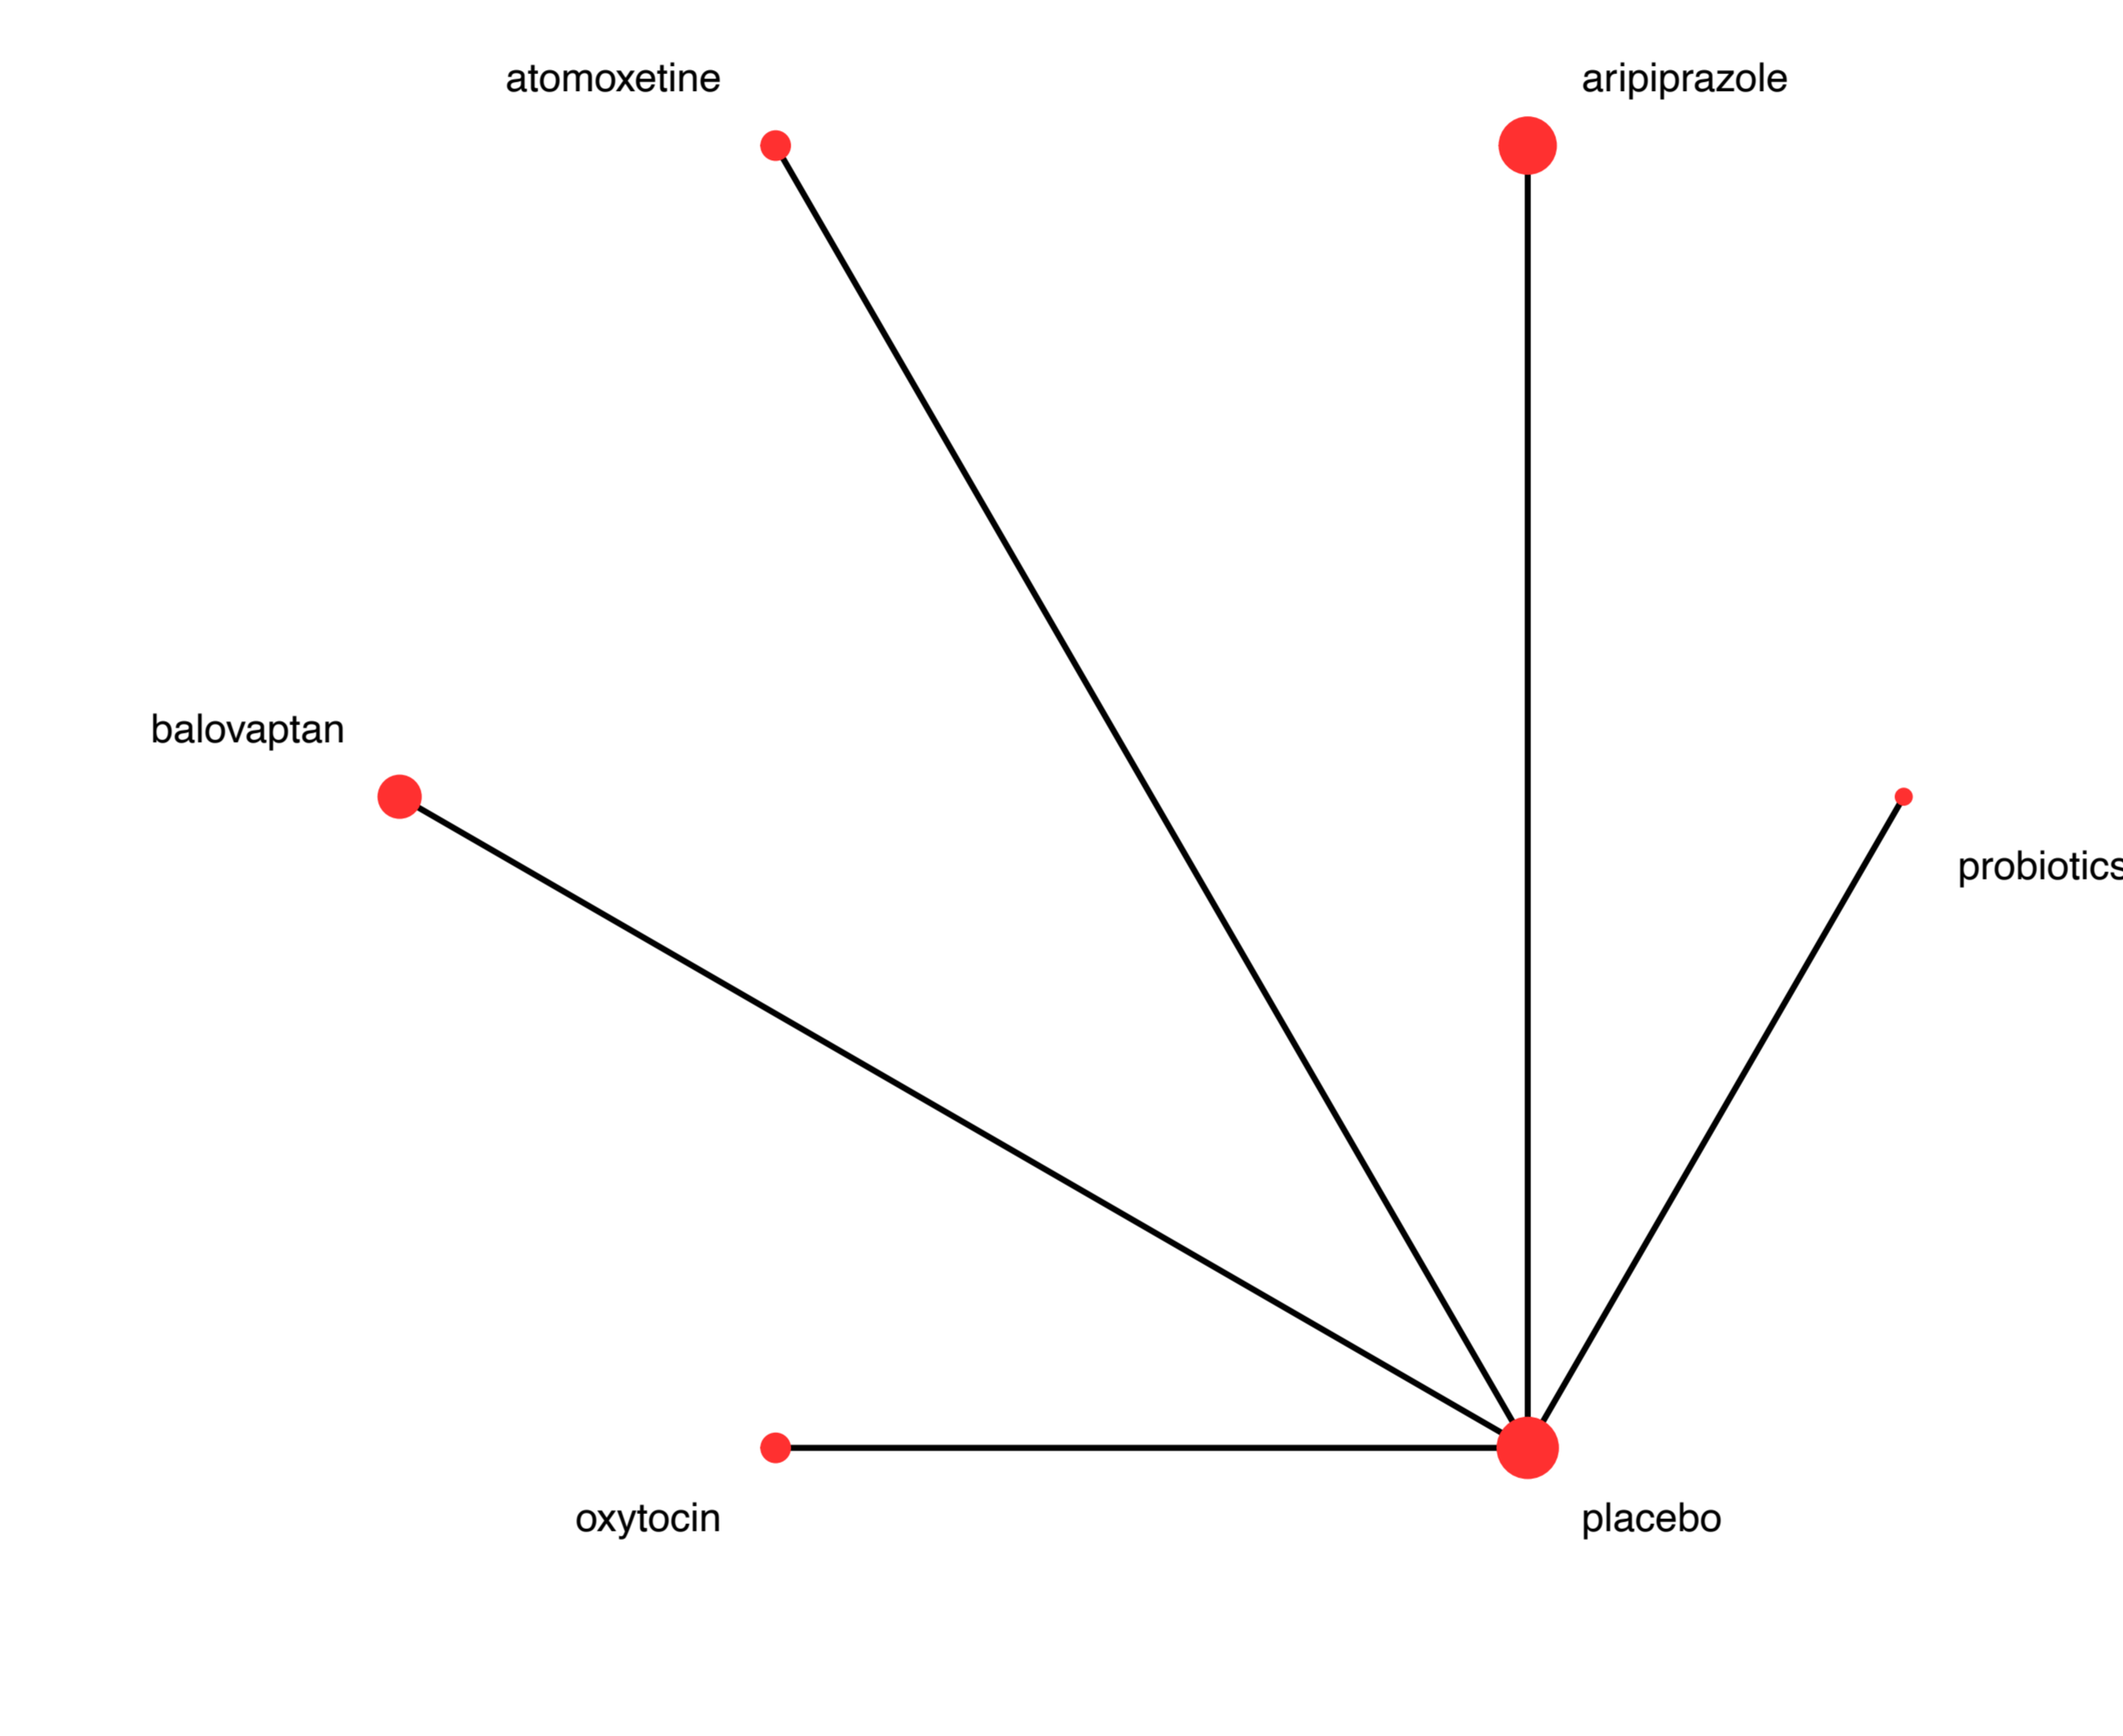

Global functioning

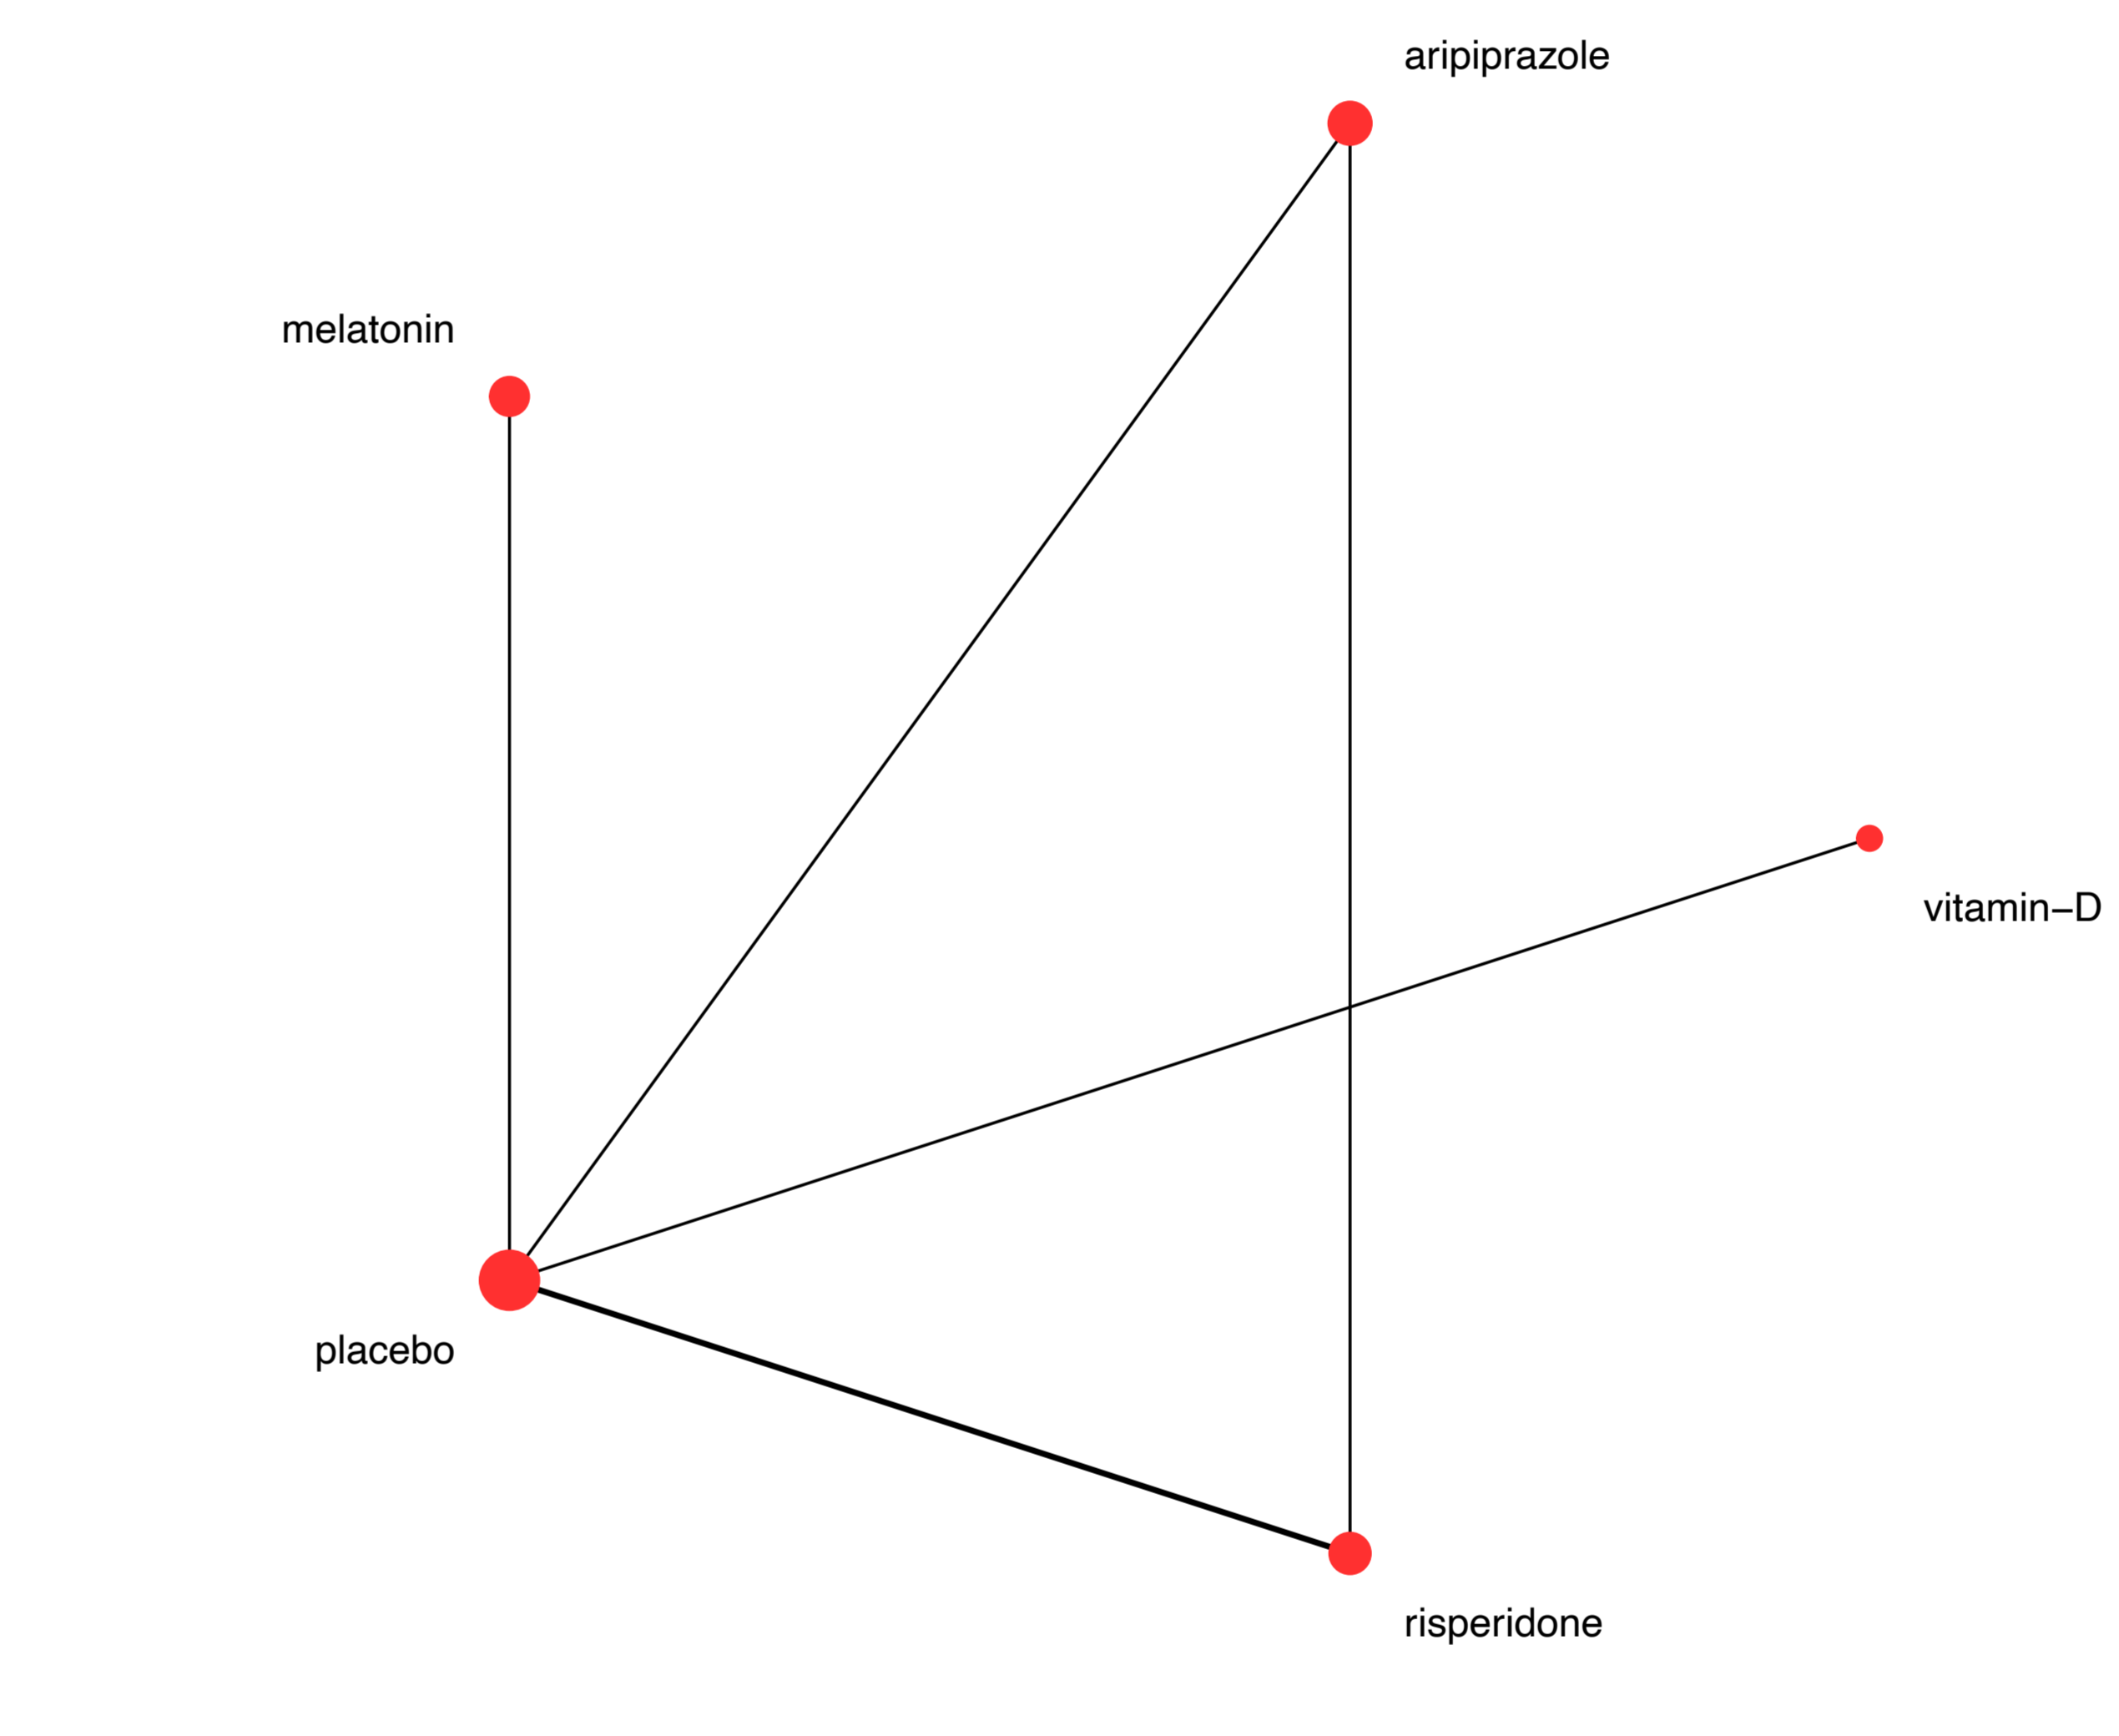

Response to treatment

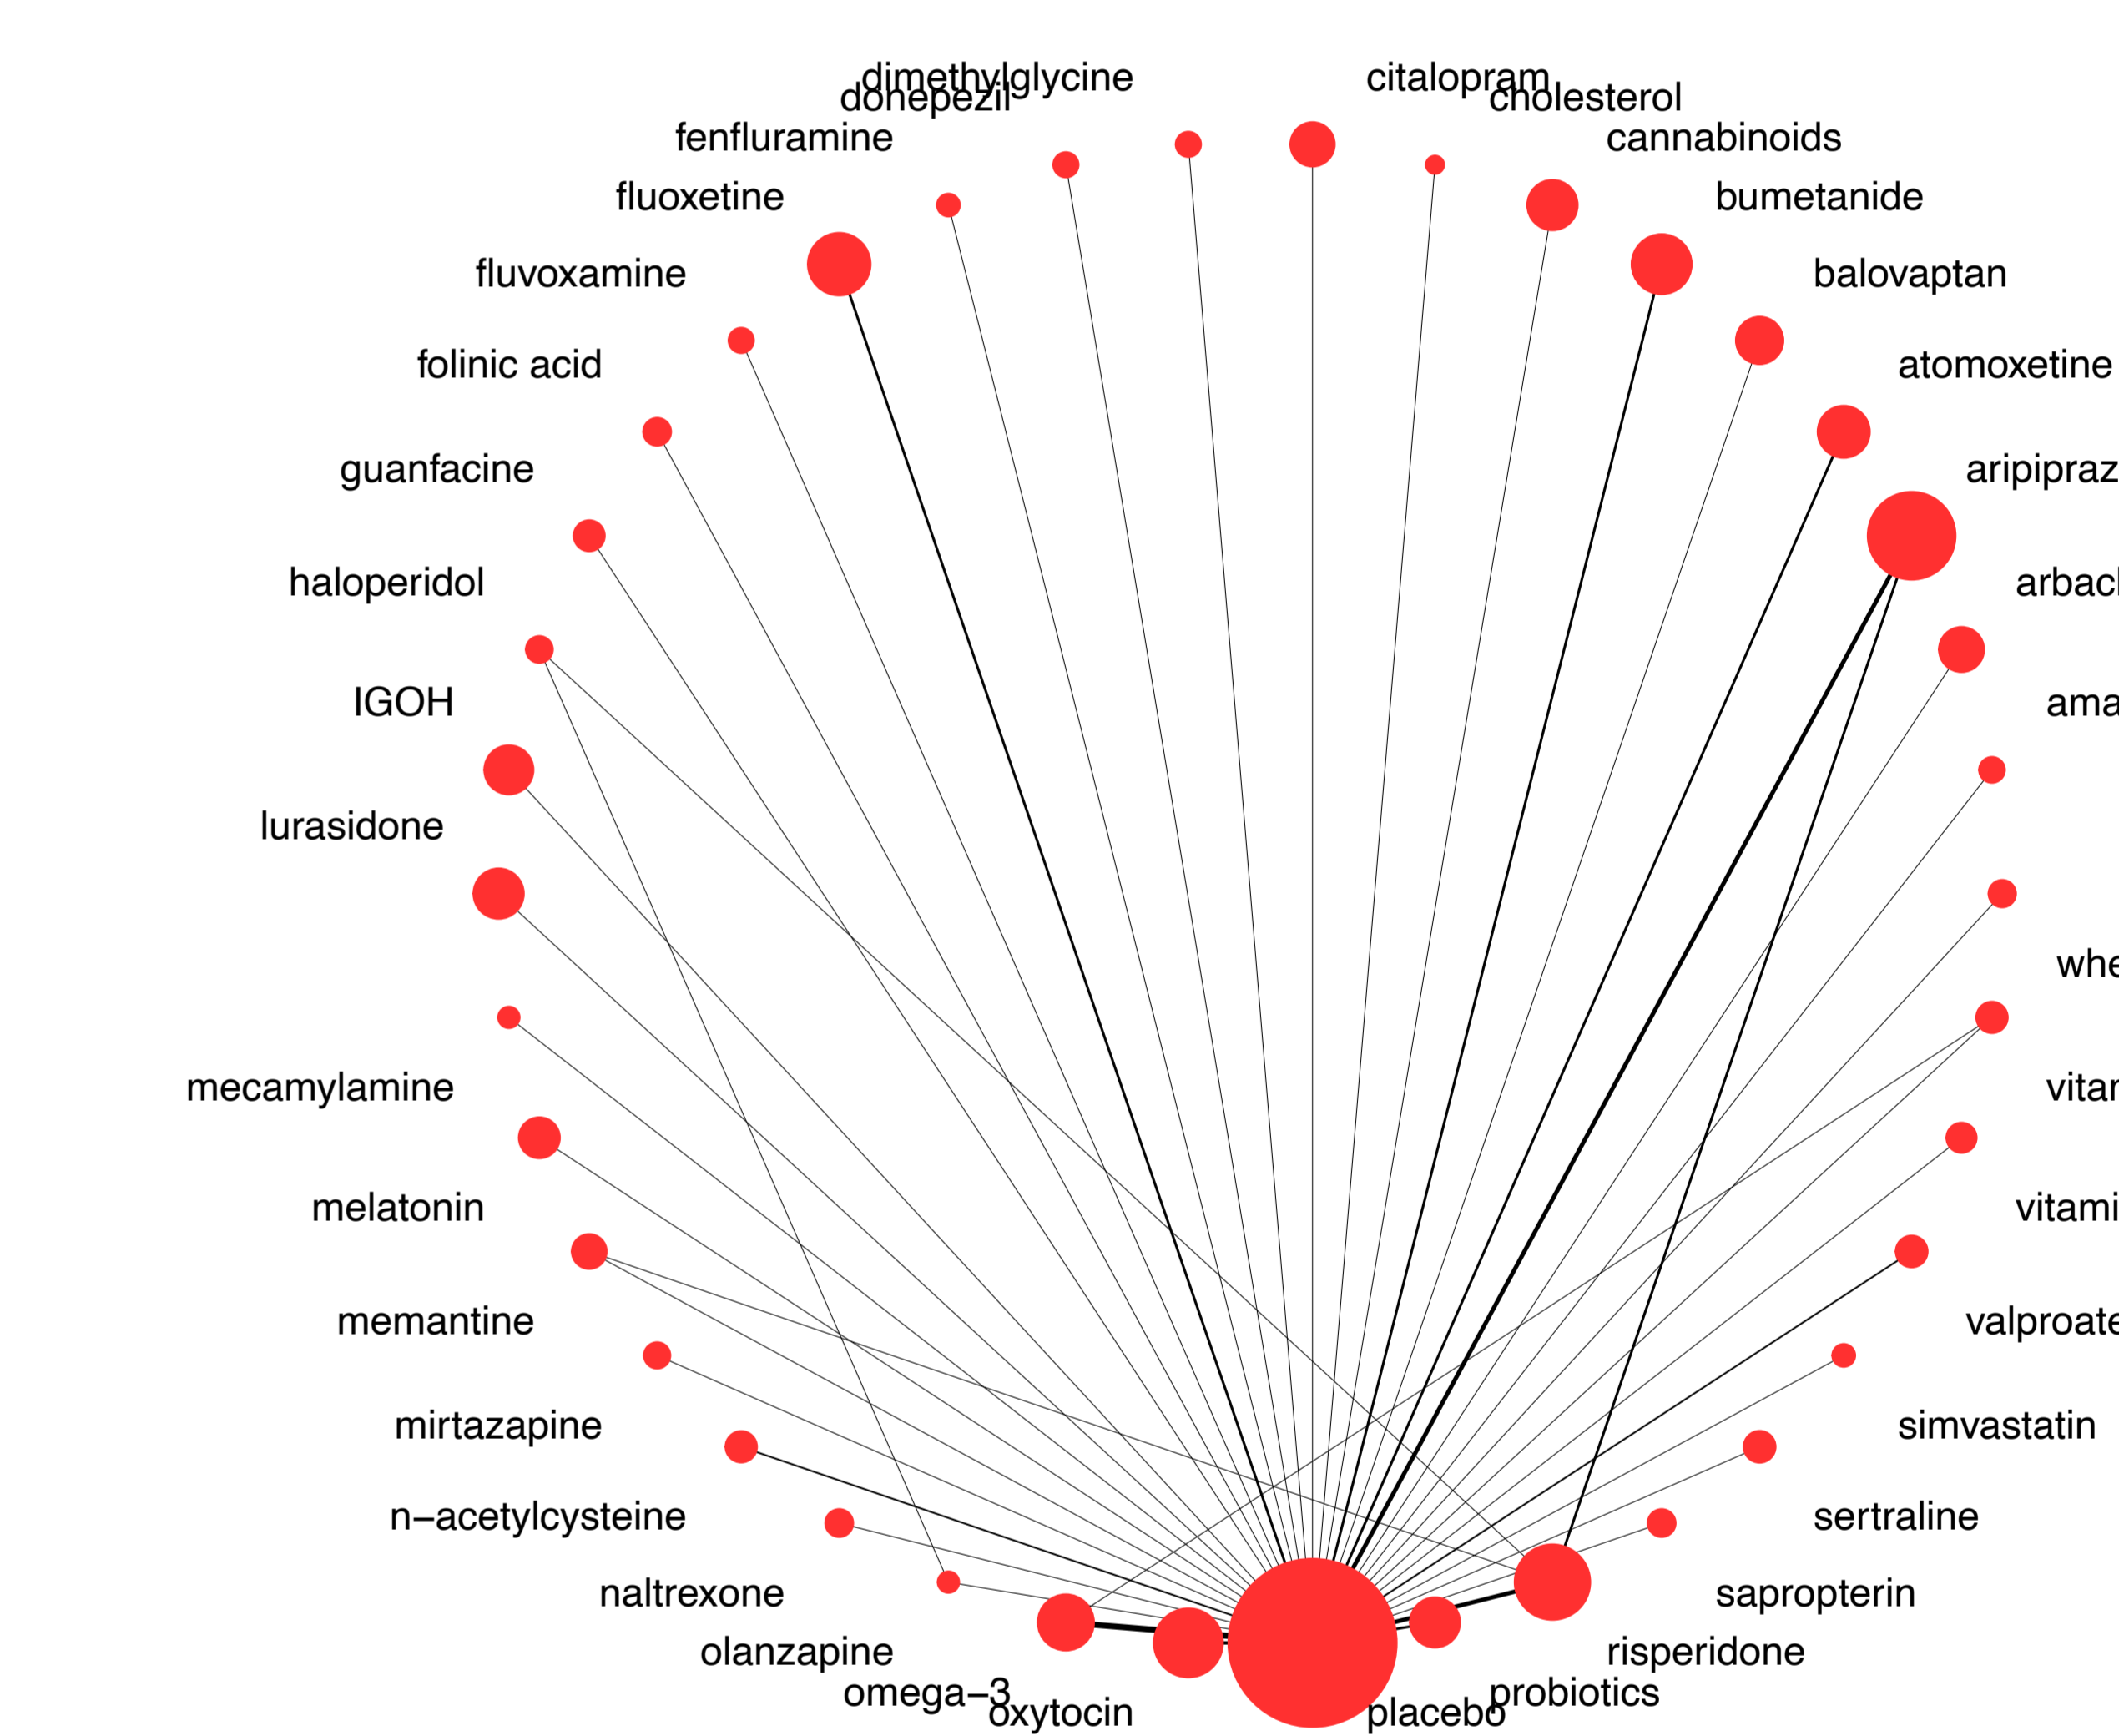

Pairwise meta-analysis was conducted for response, due to incoherence

Dropouts due to any reason

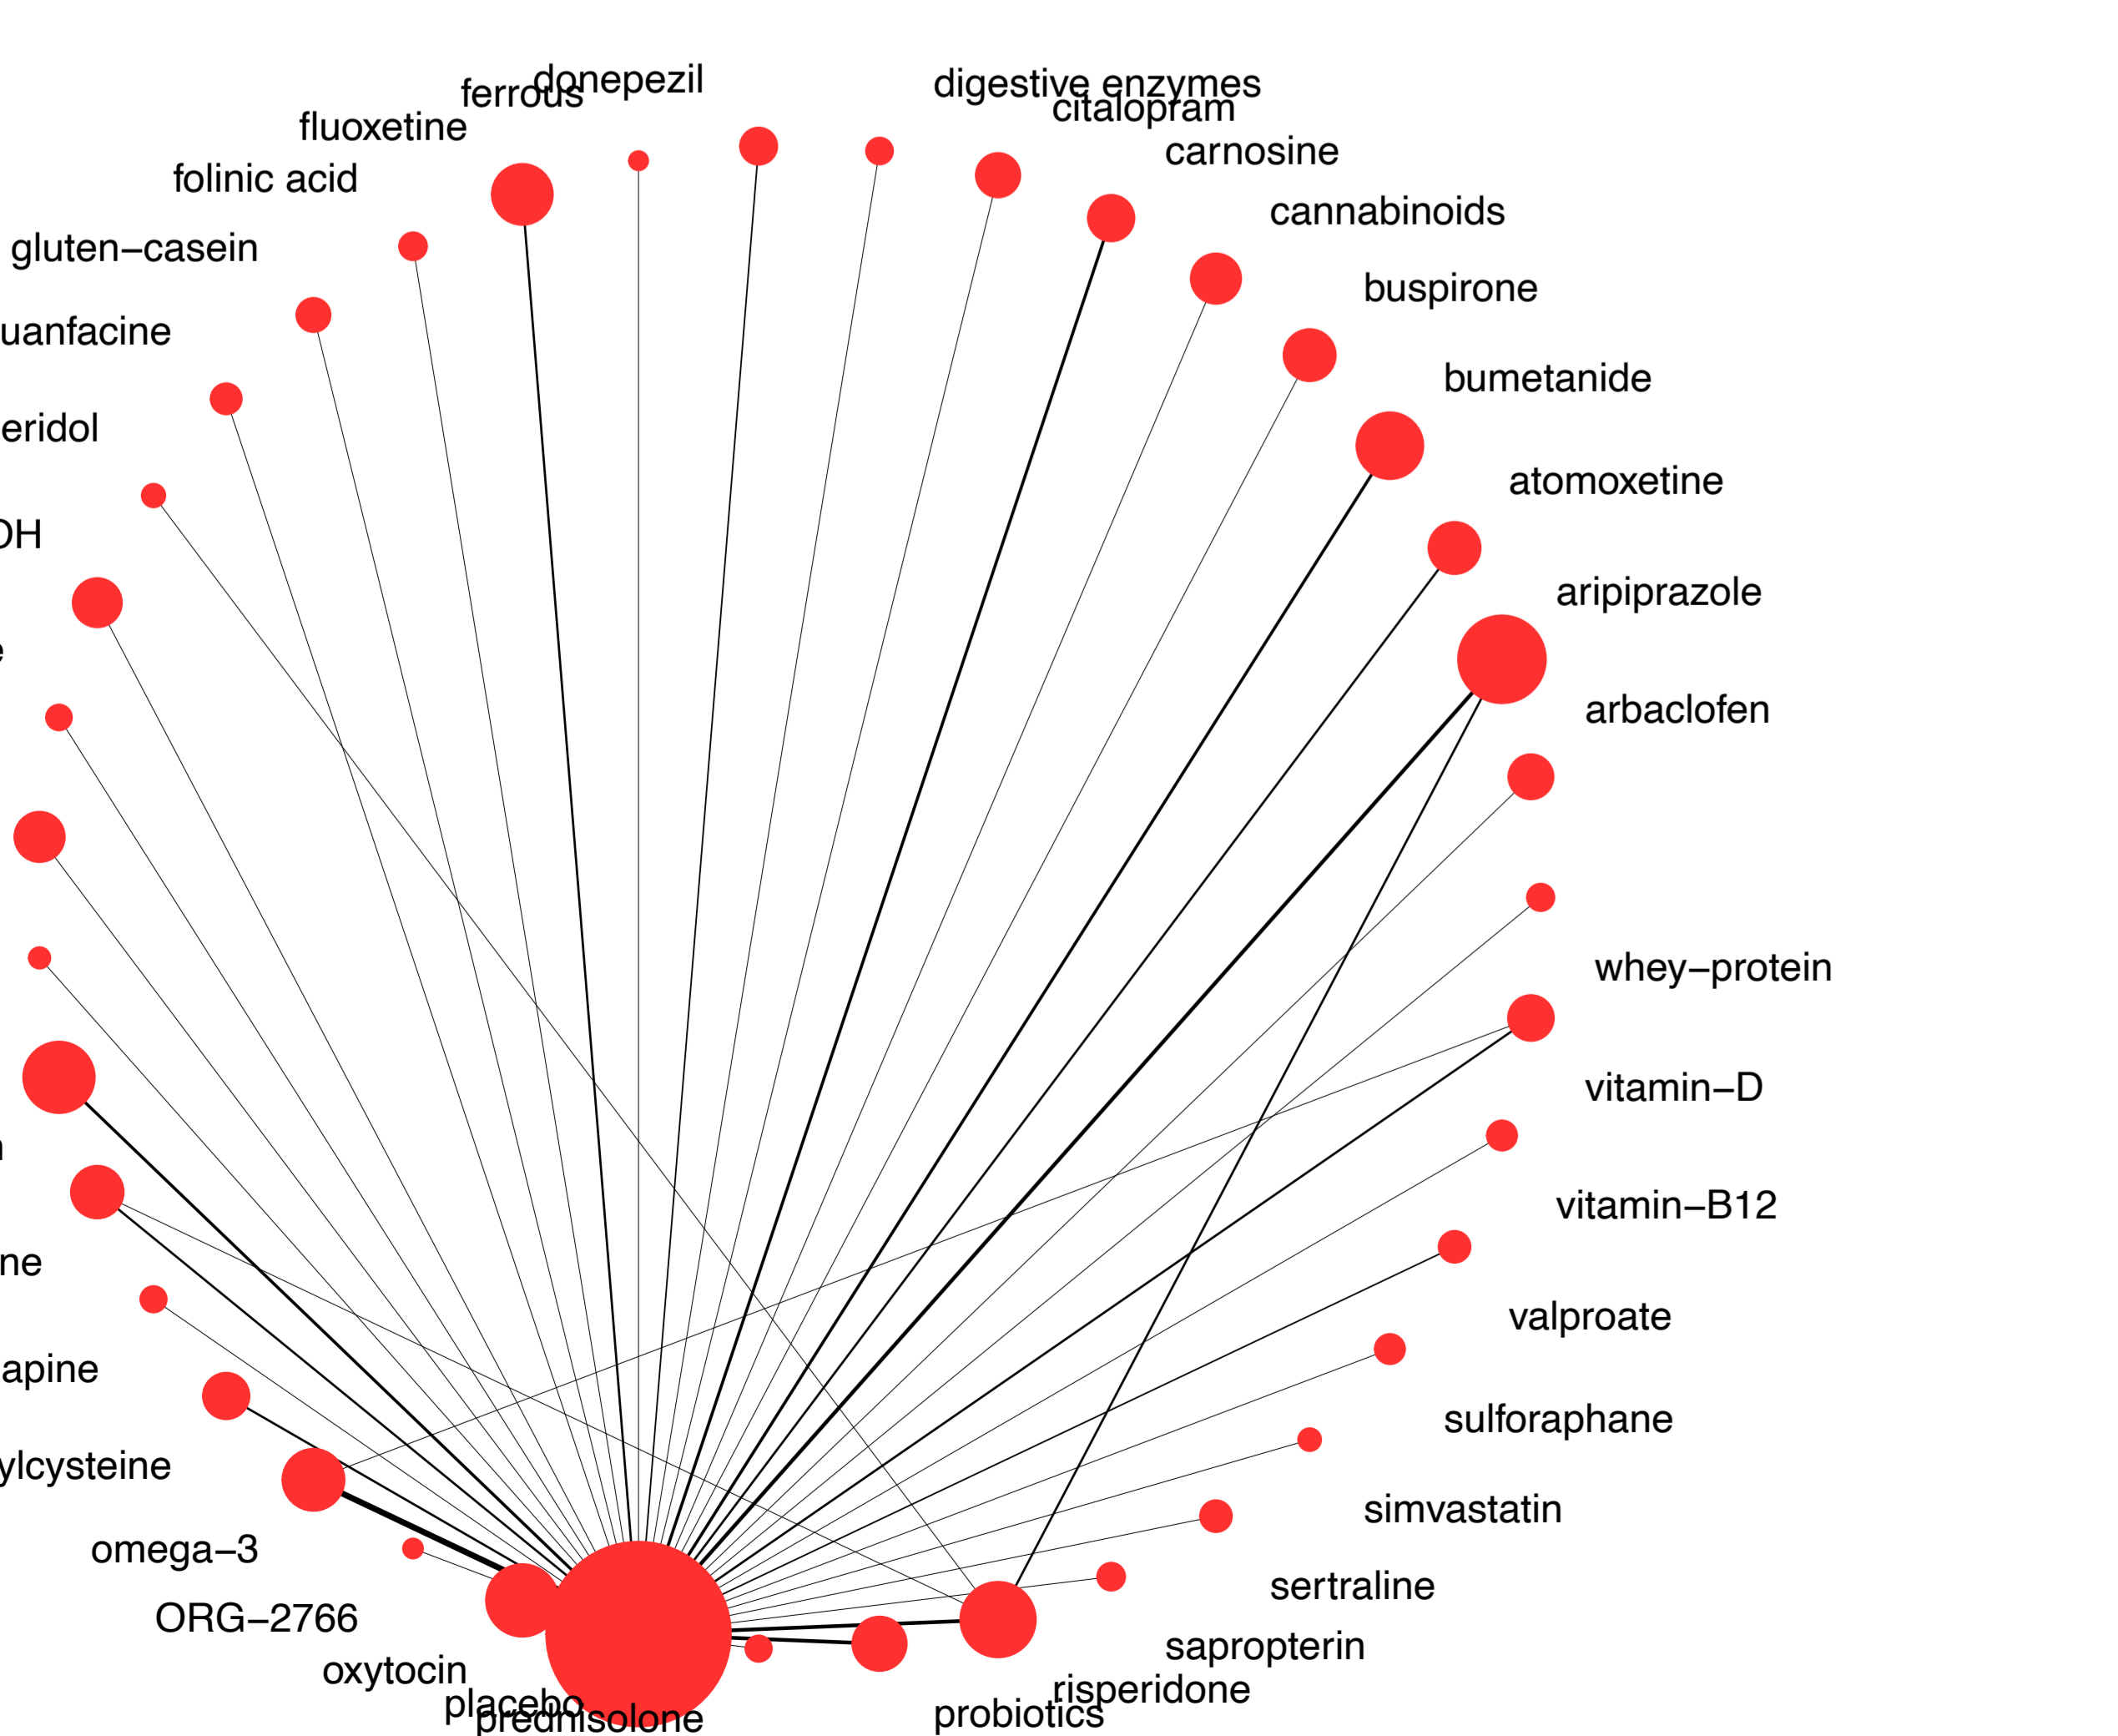

Dropouts due to adverse events

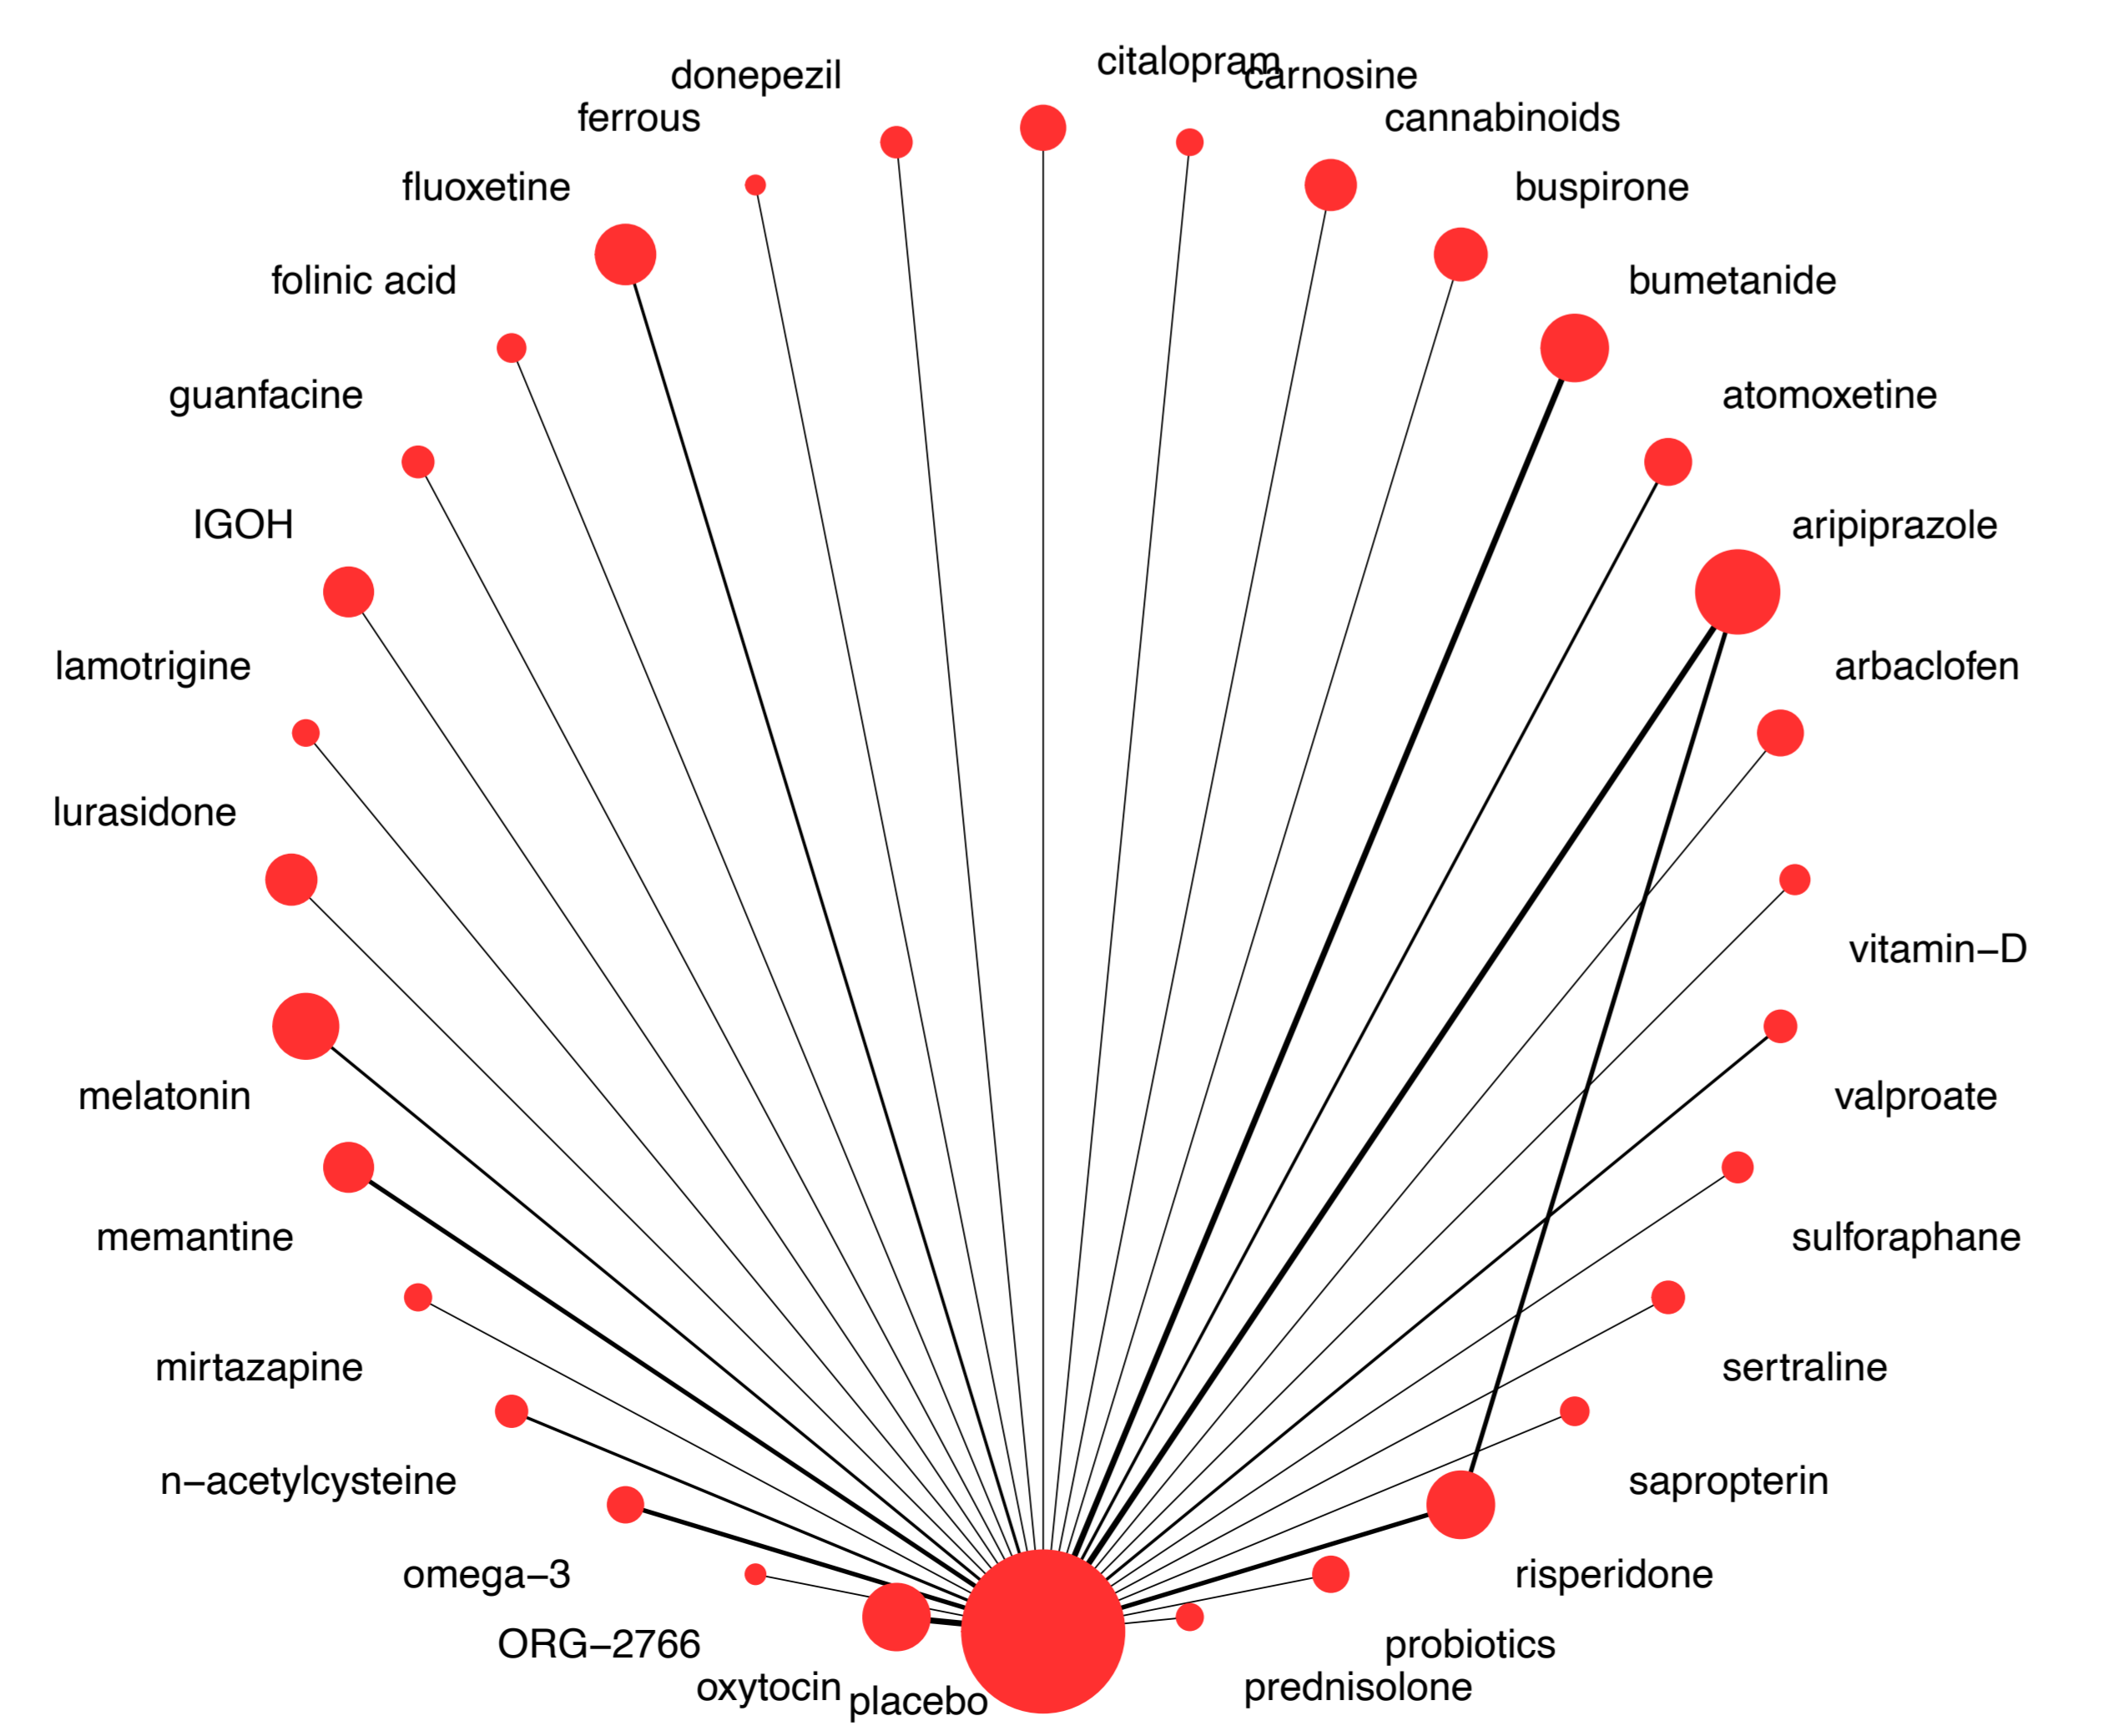

Any adverse event

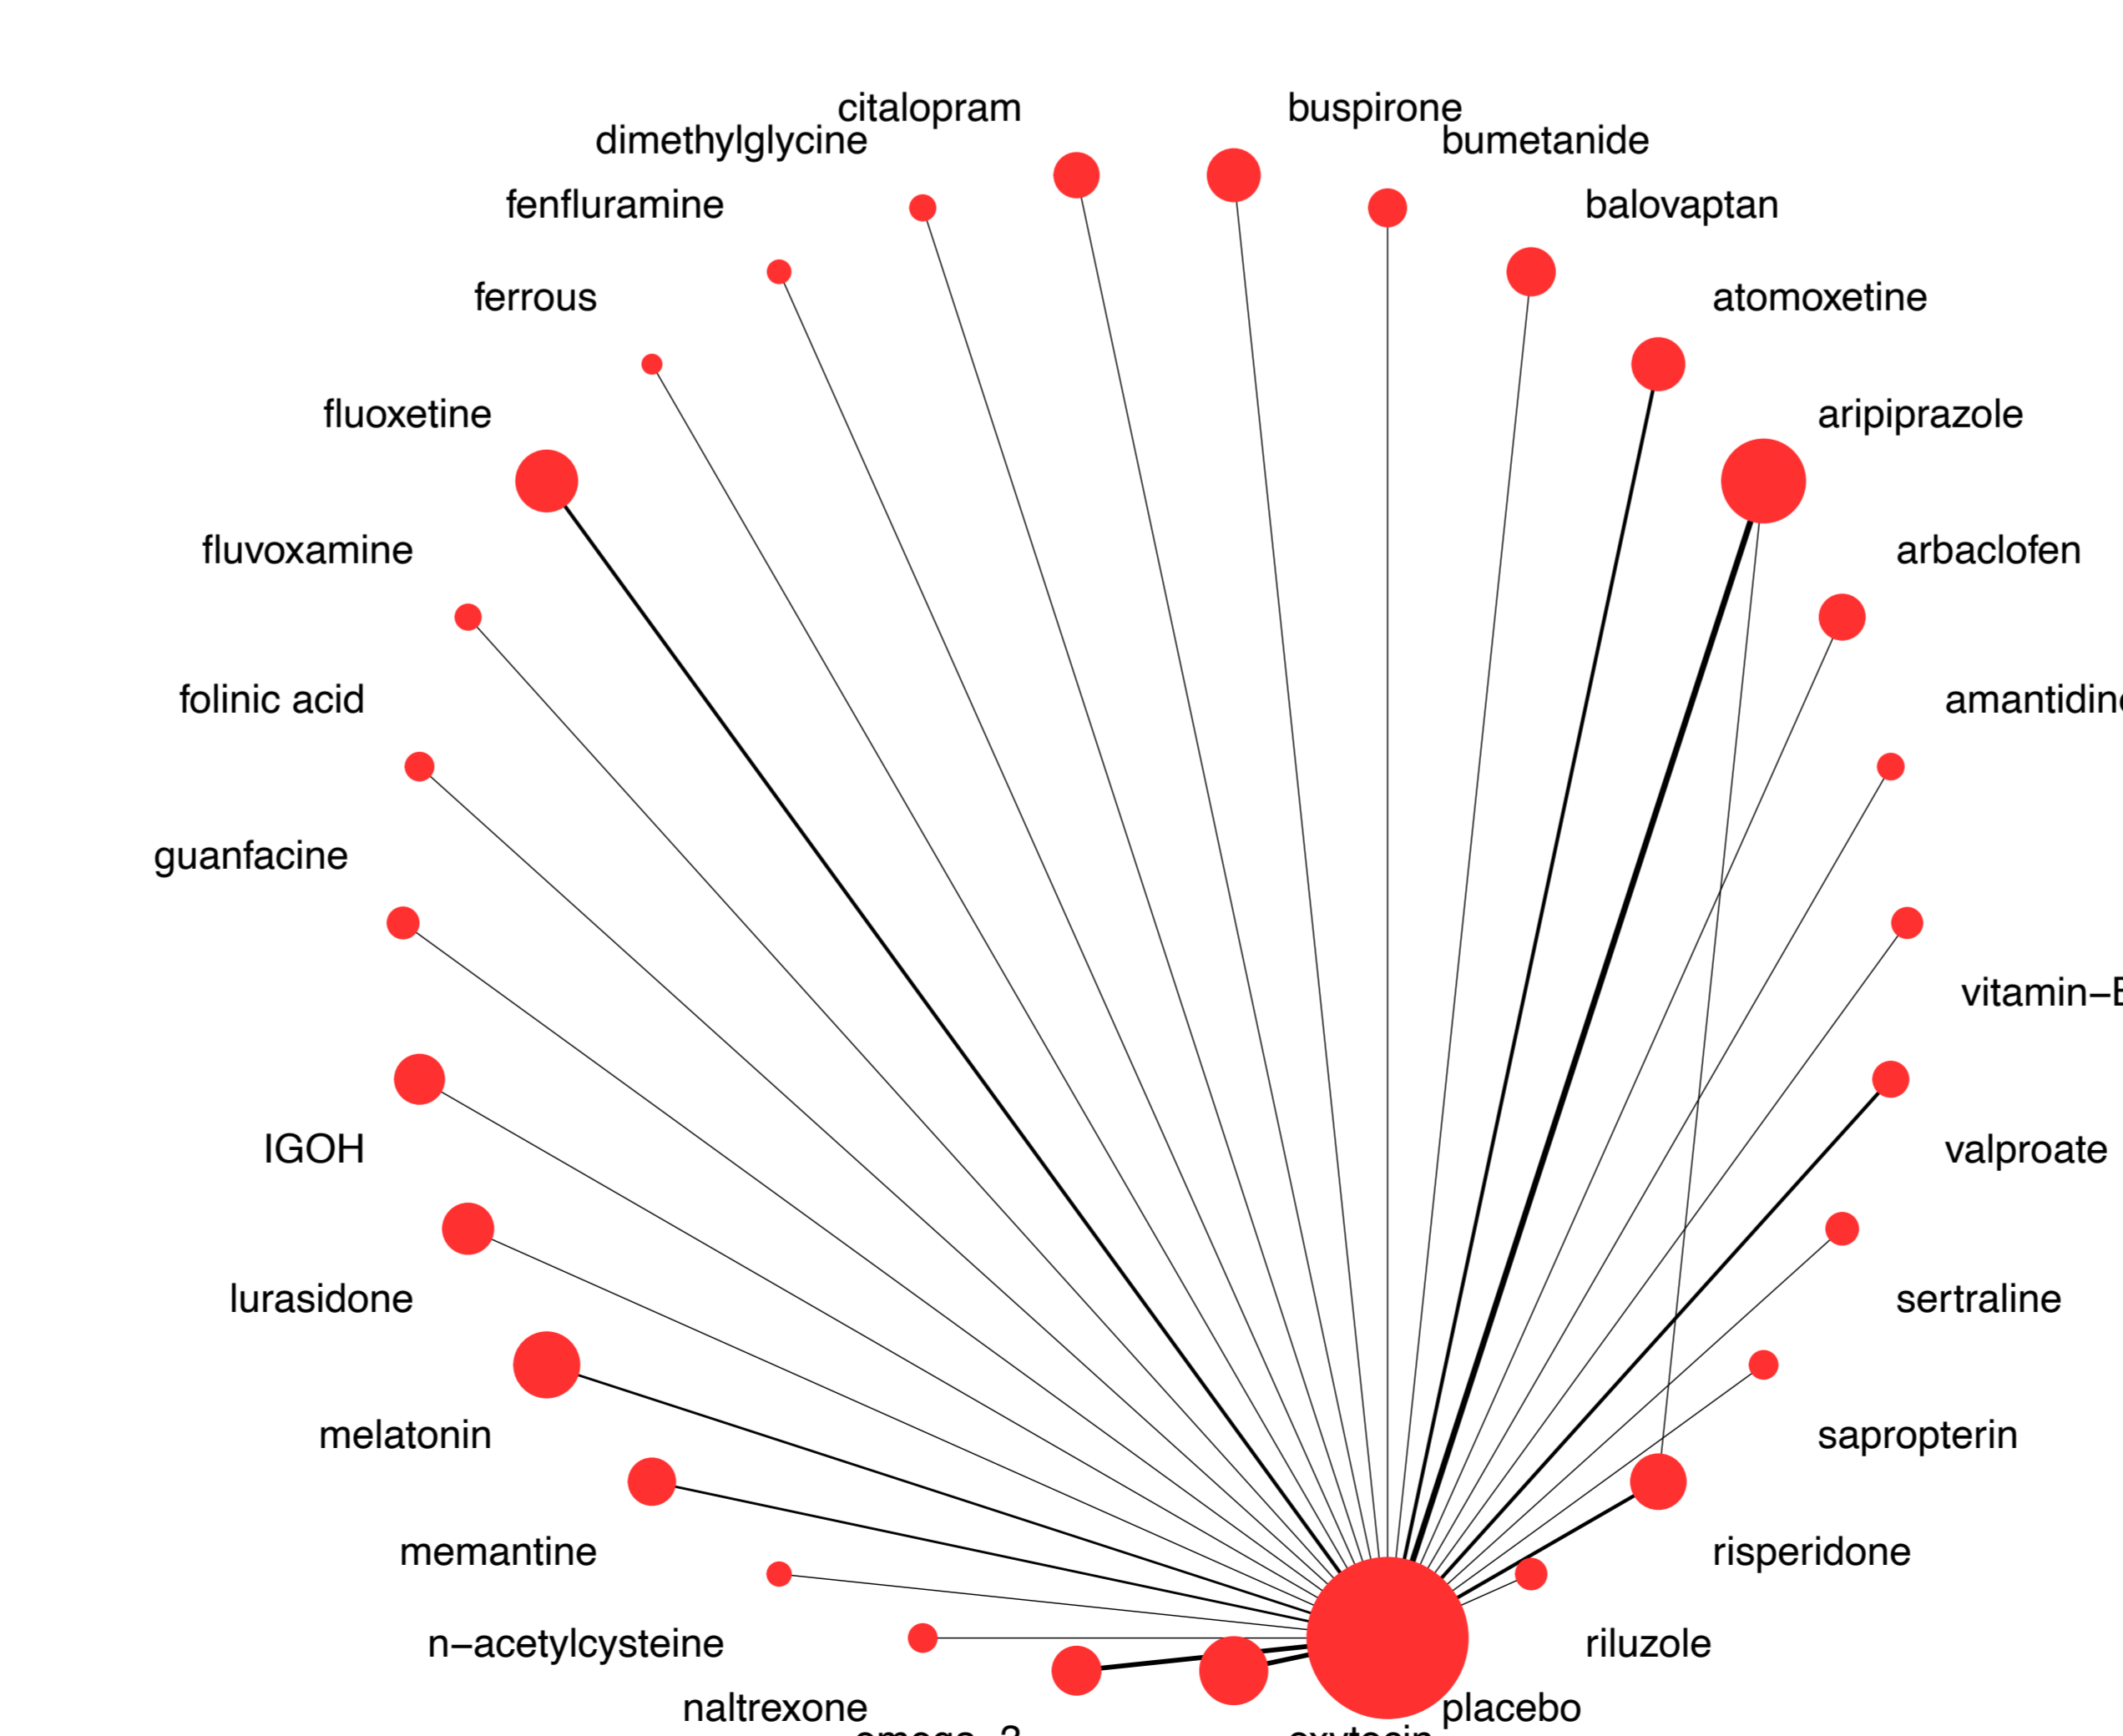

Sedation

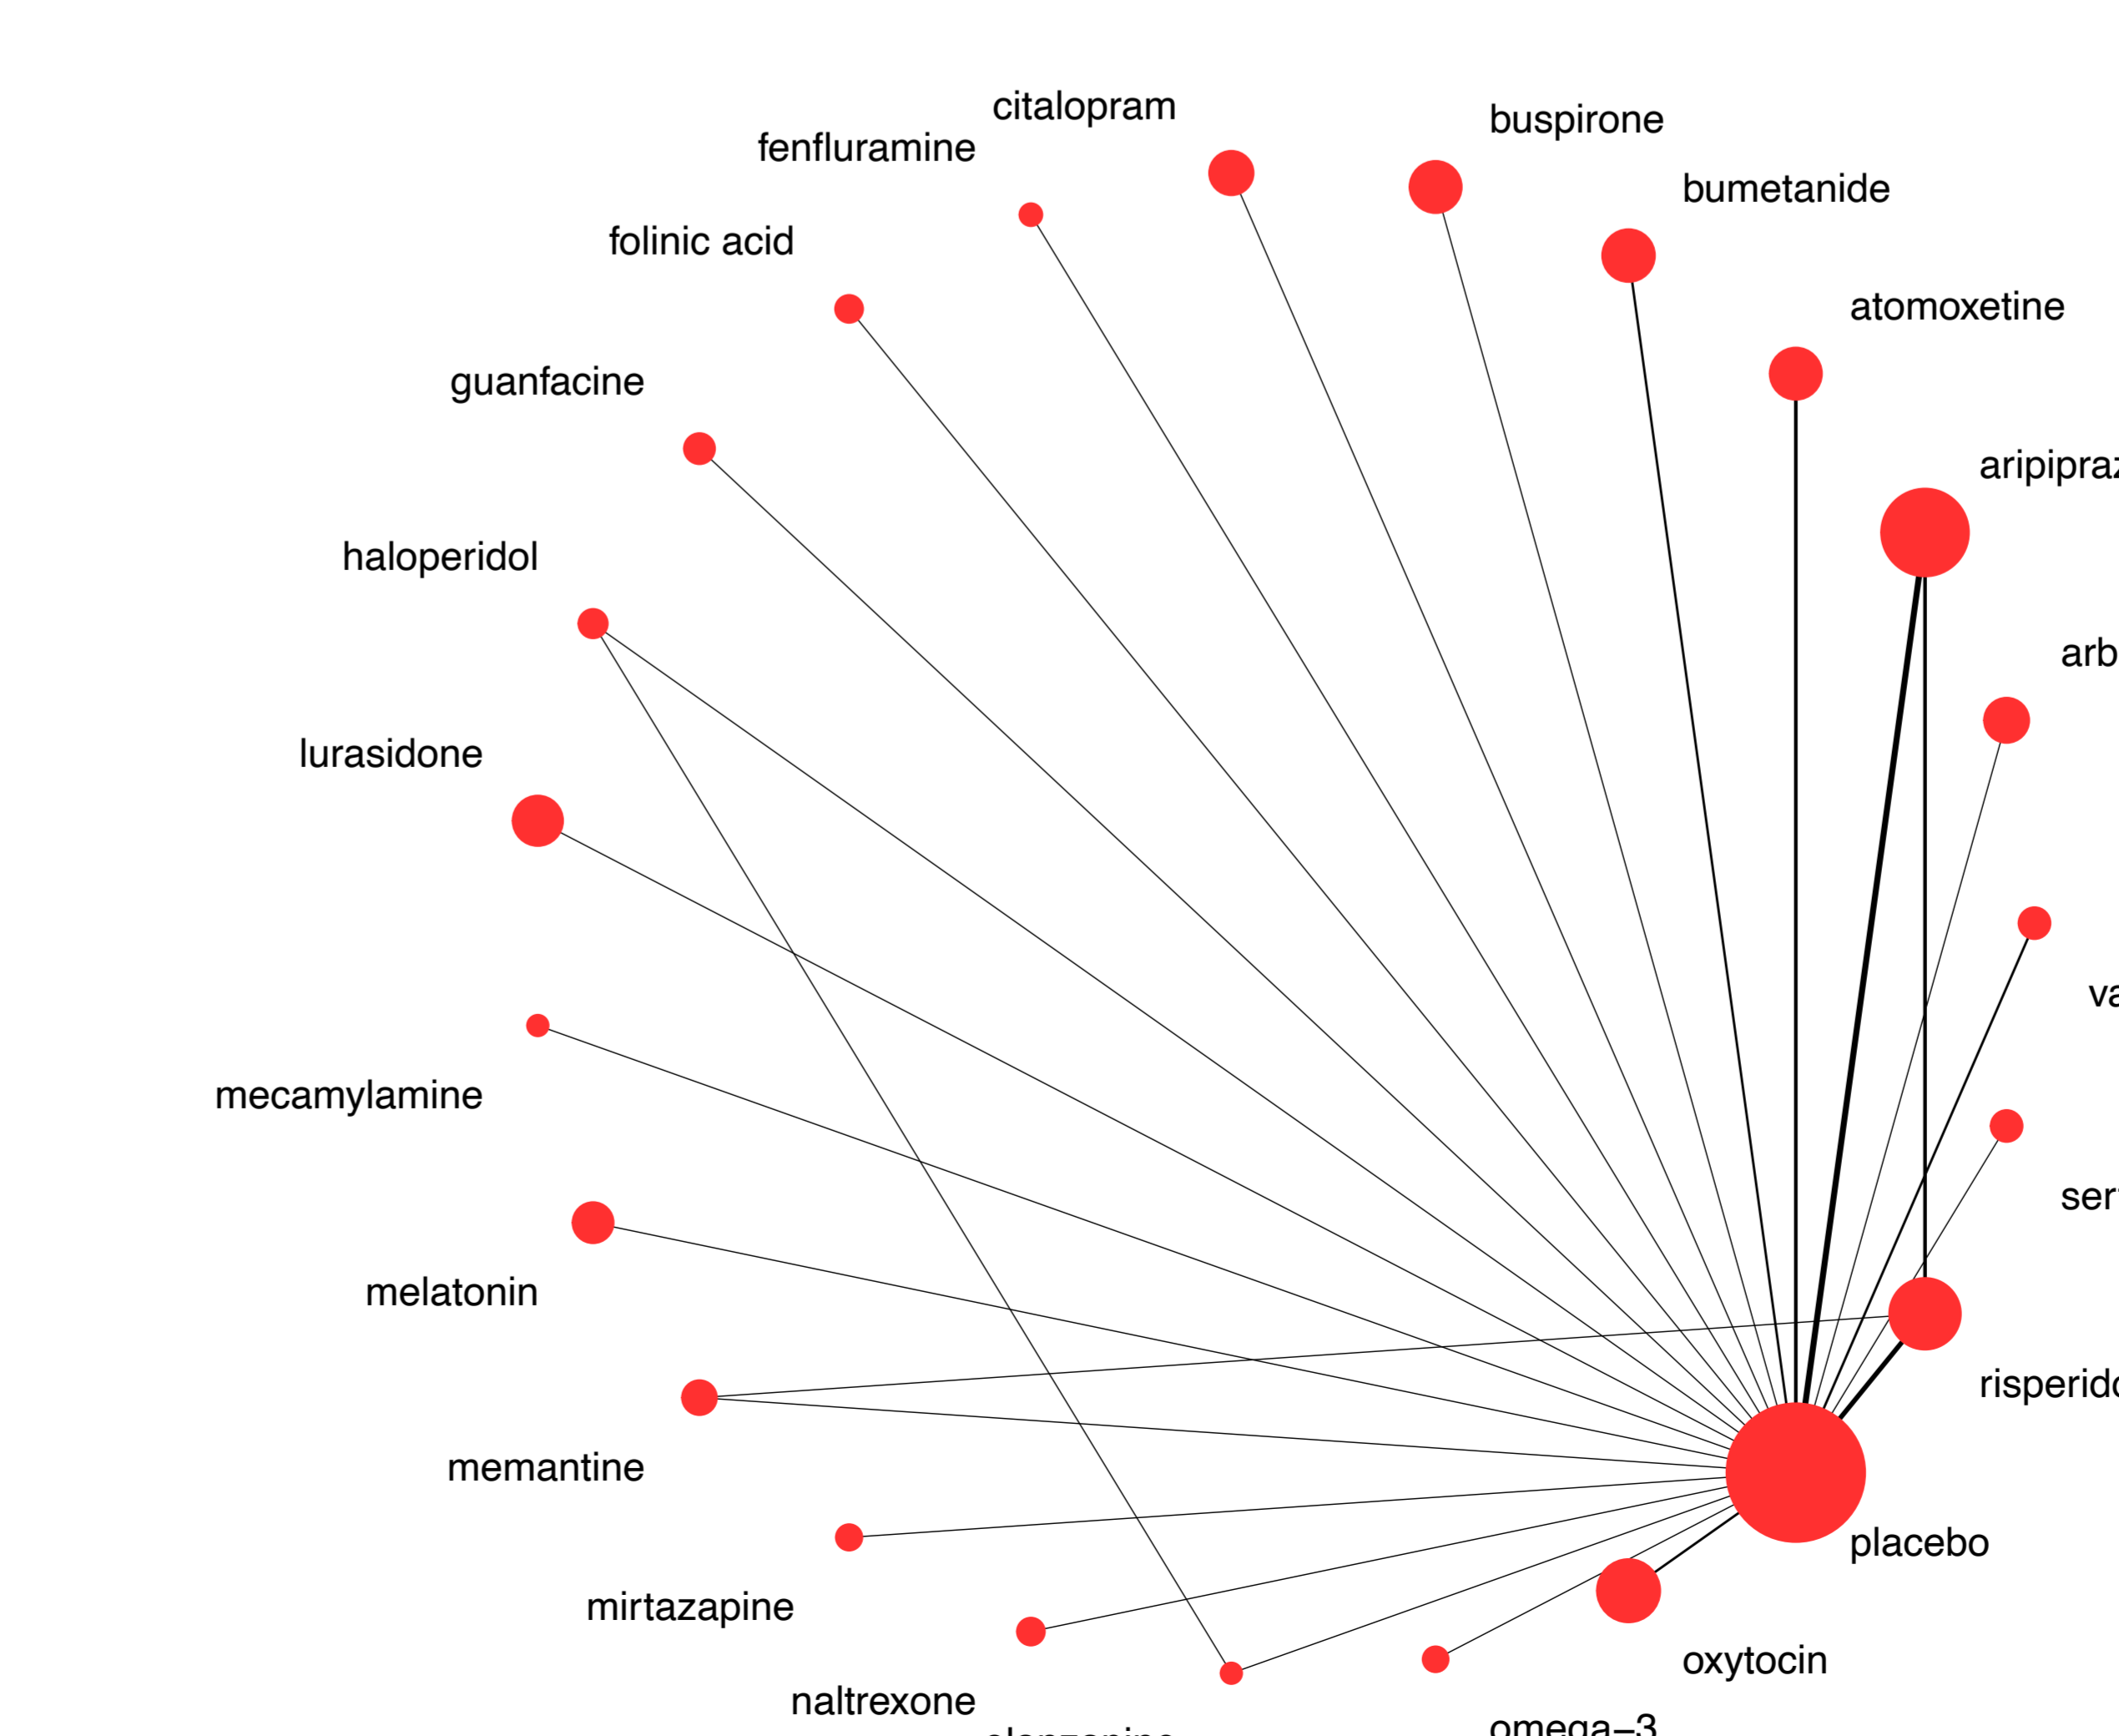

Pairwise meta-analysis was conducted for sedation, due to incoherence.

Weight gain

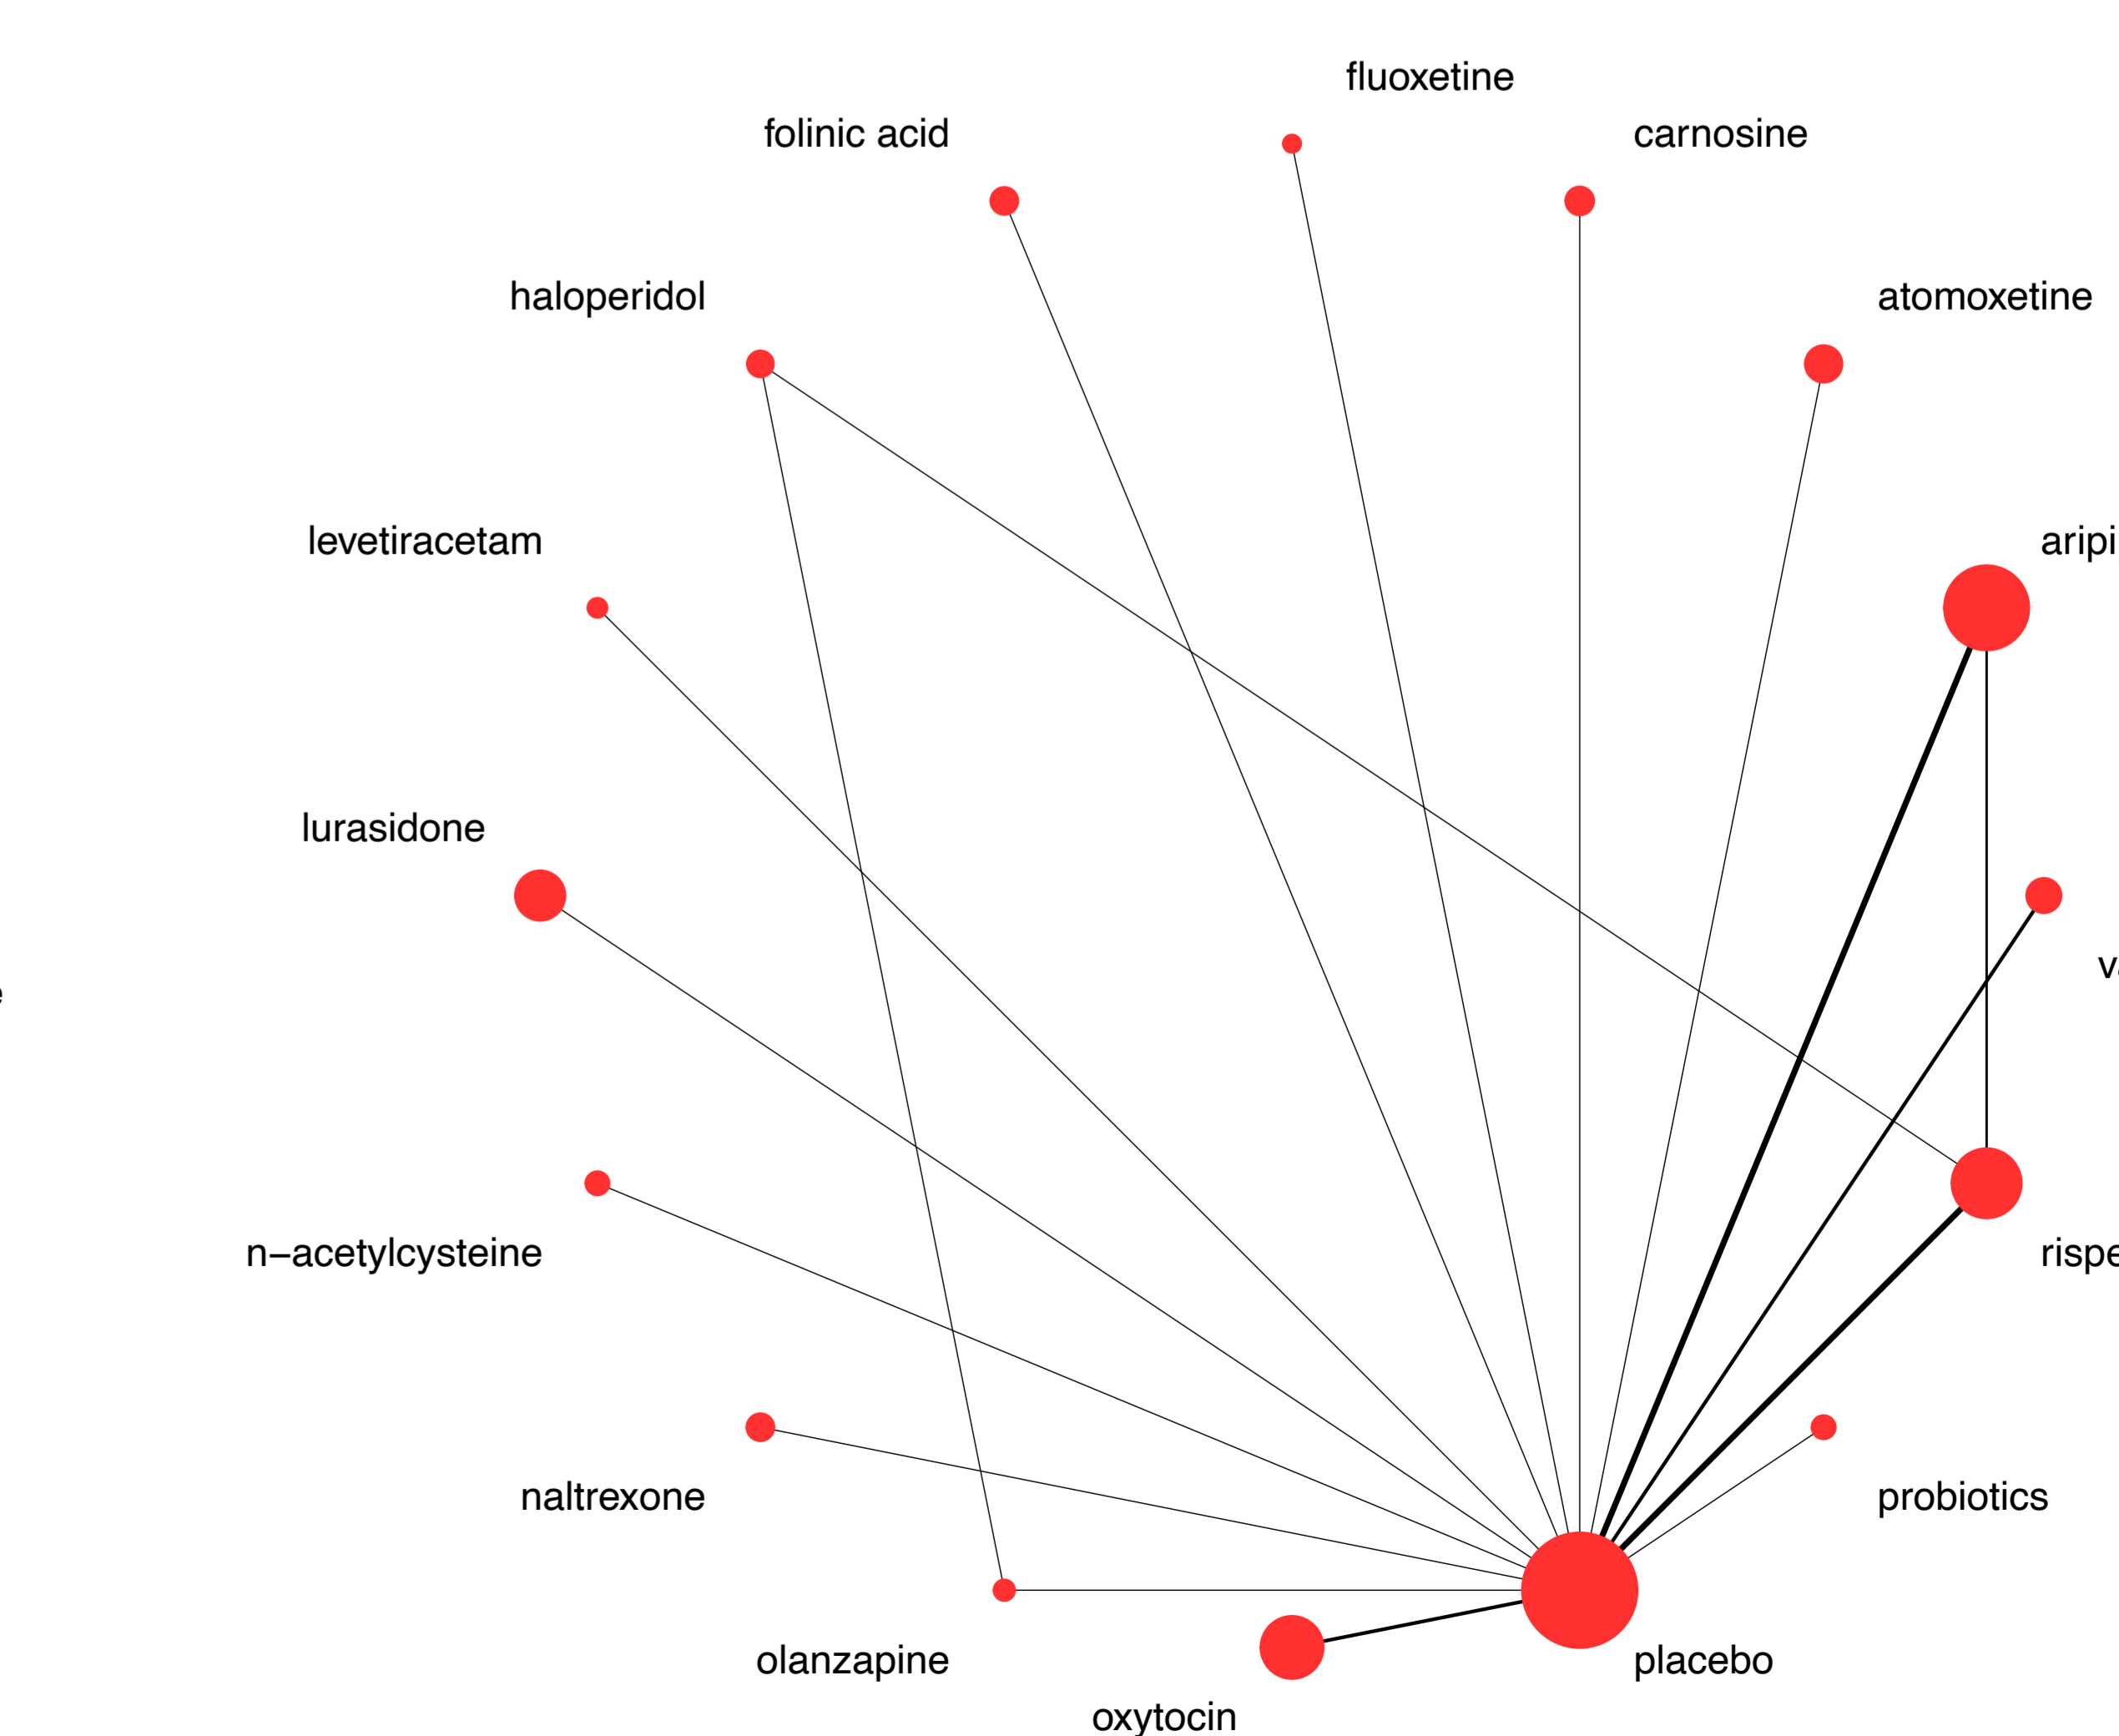

Pairwise meta-analysis was conducted for weight gain, due to incoherence.

Social-communication difficulties

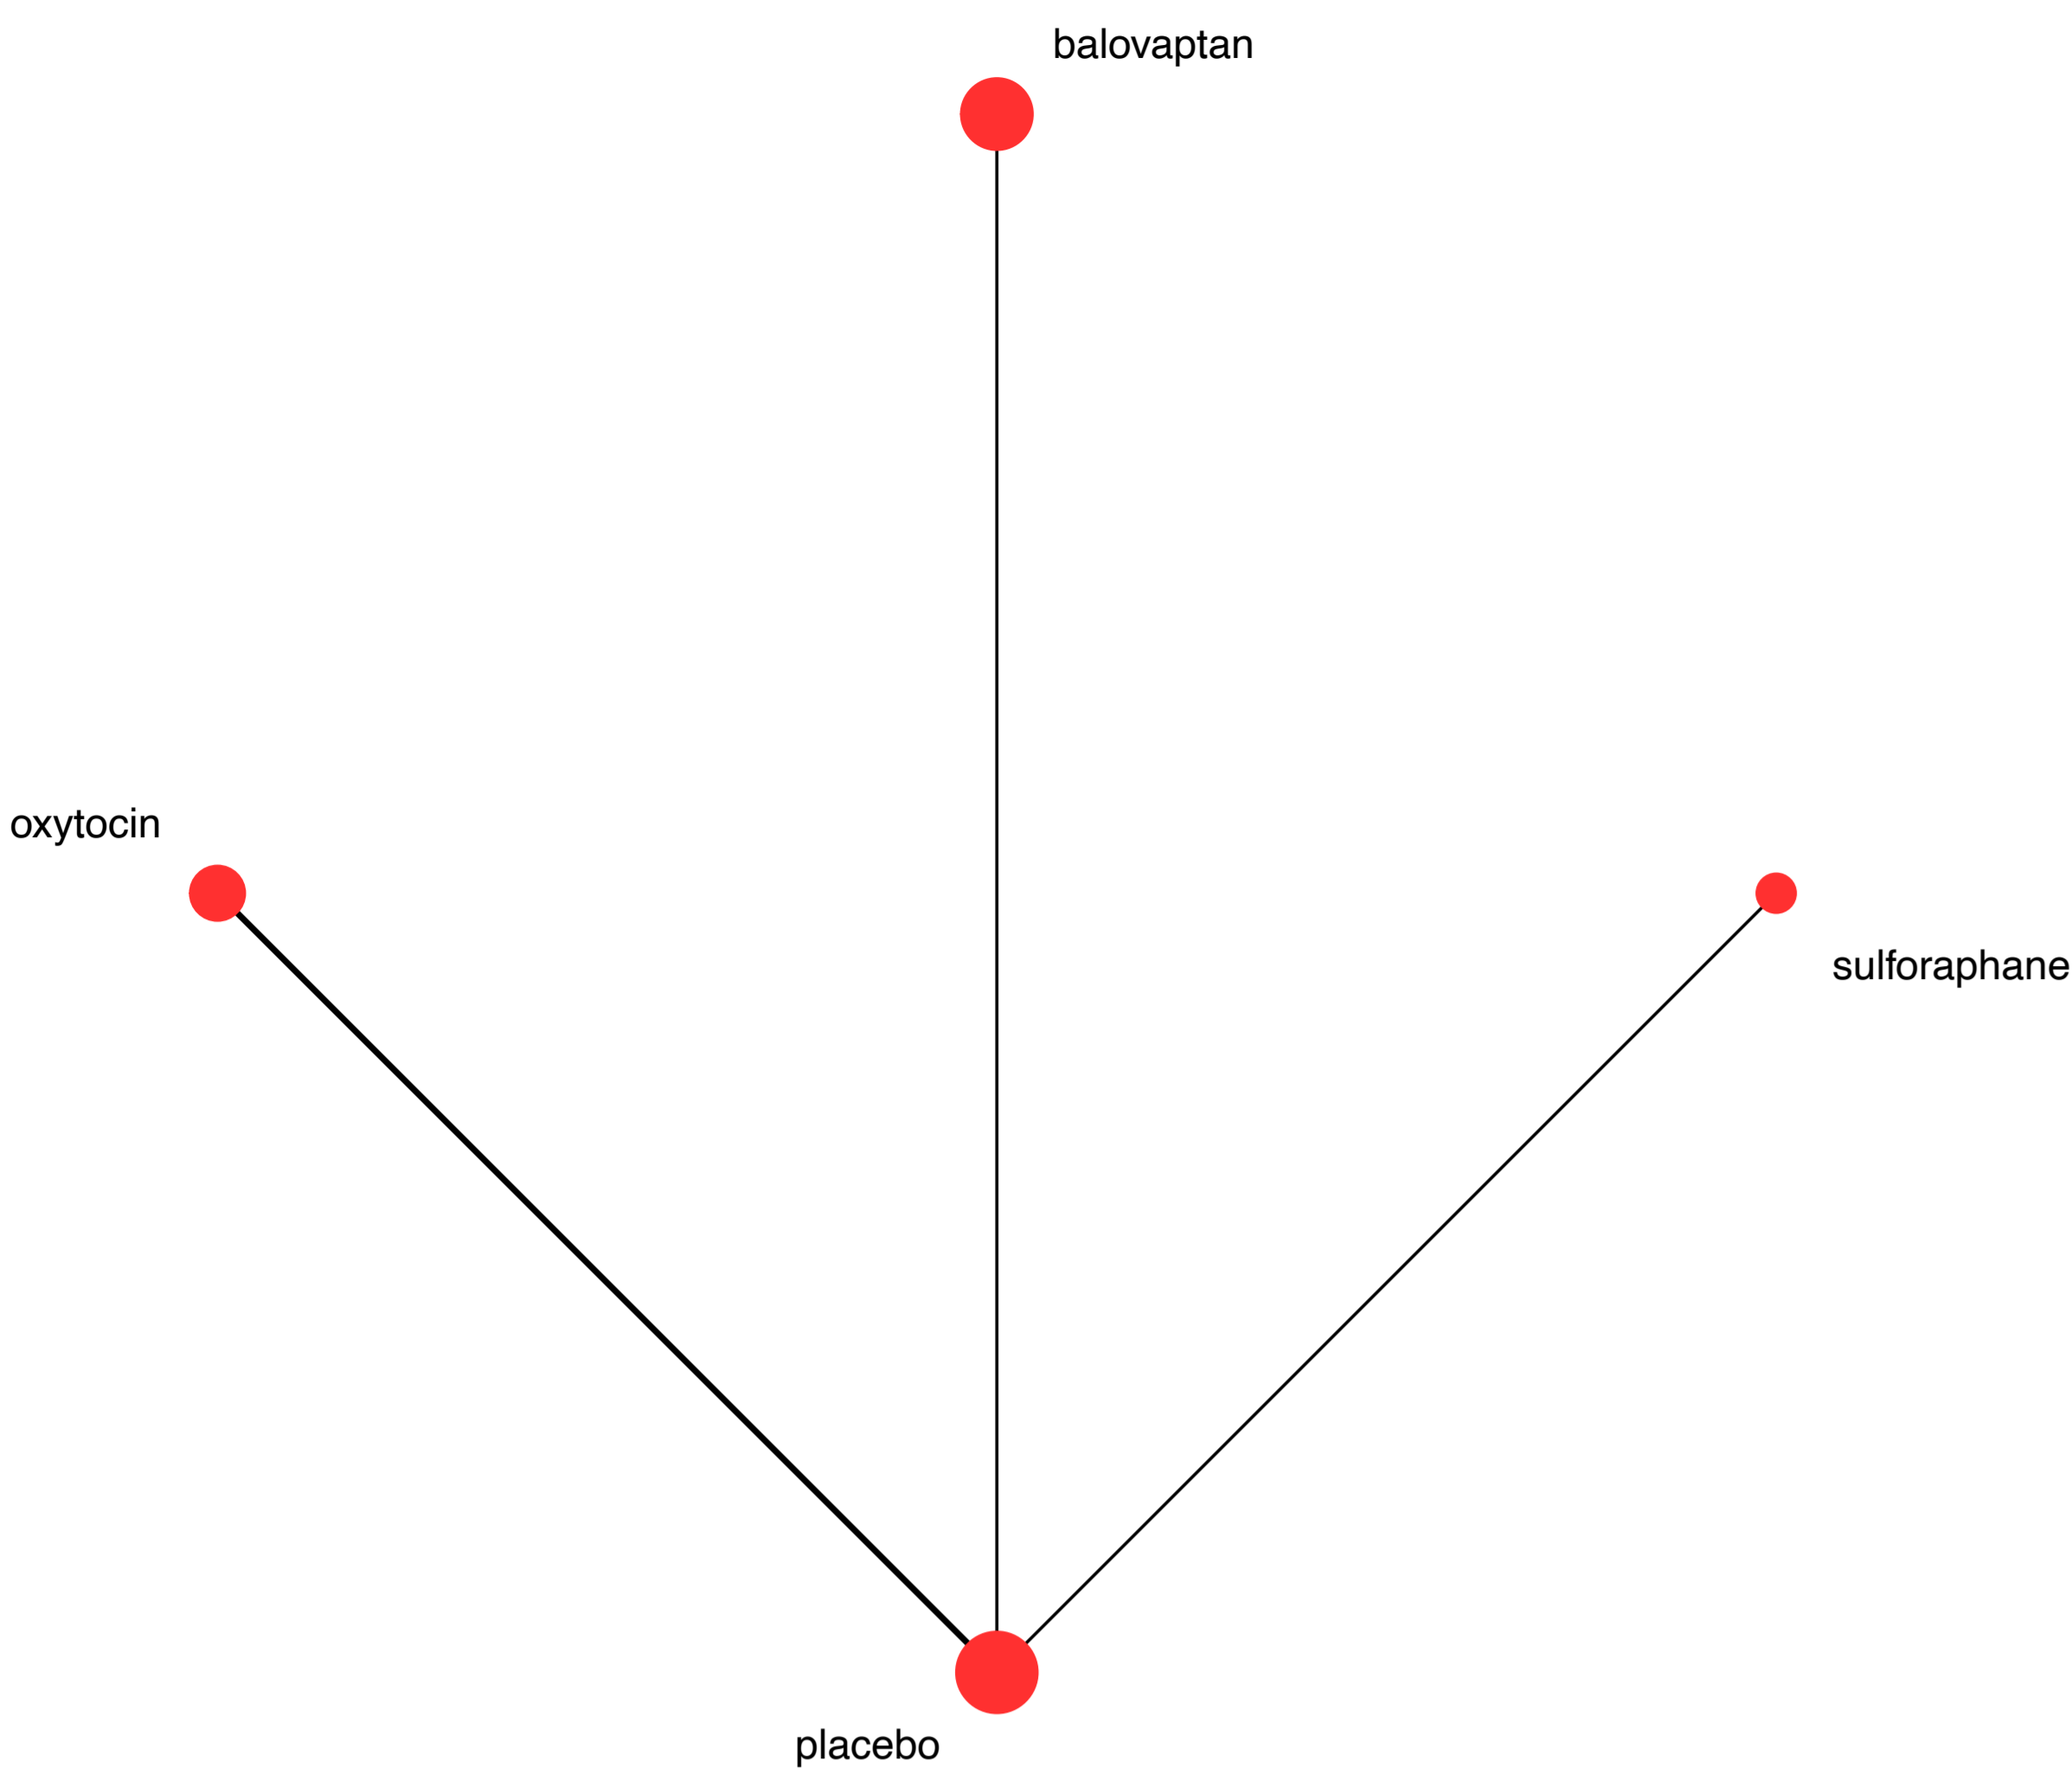

Repetitive behaviors

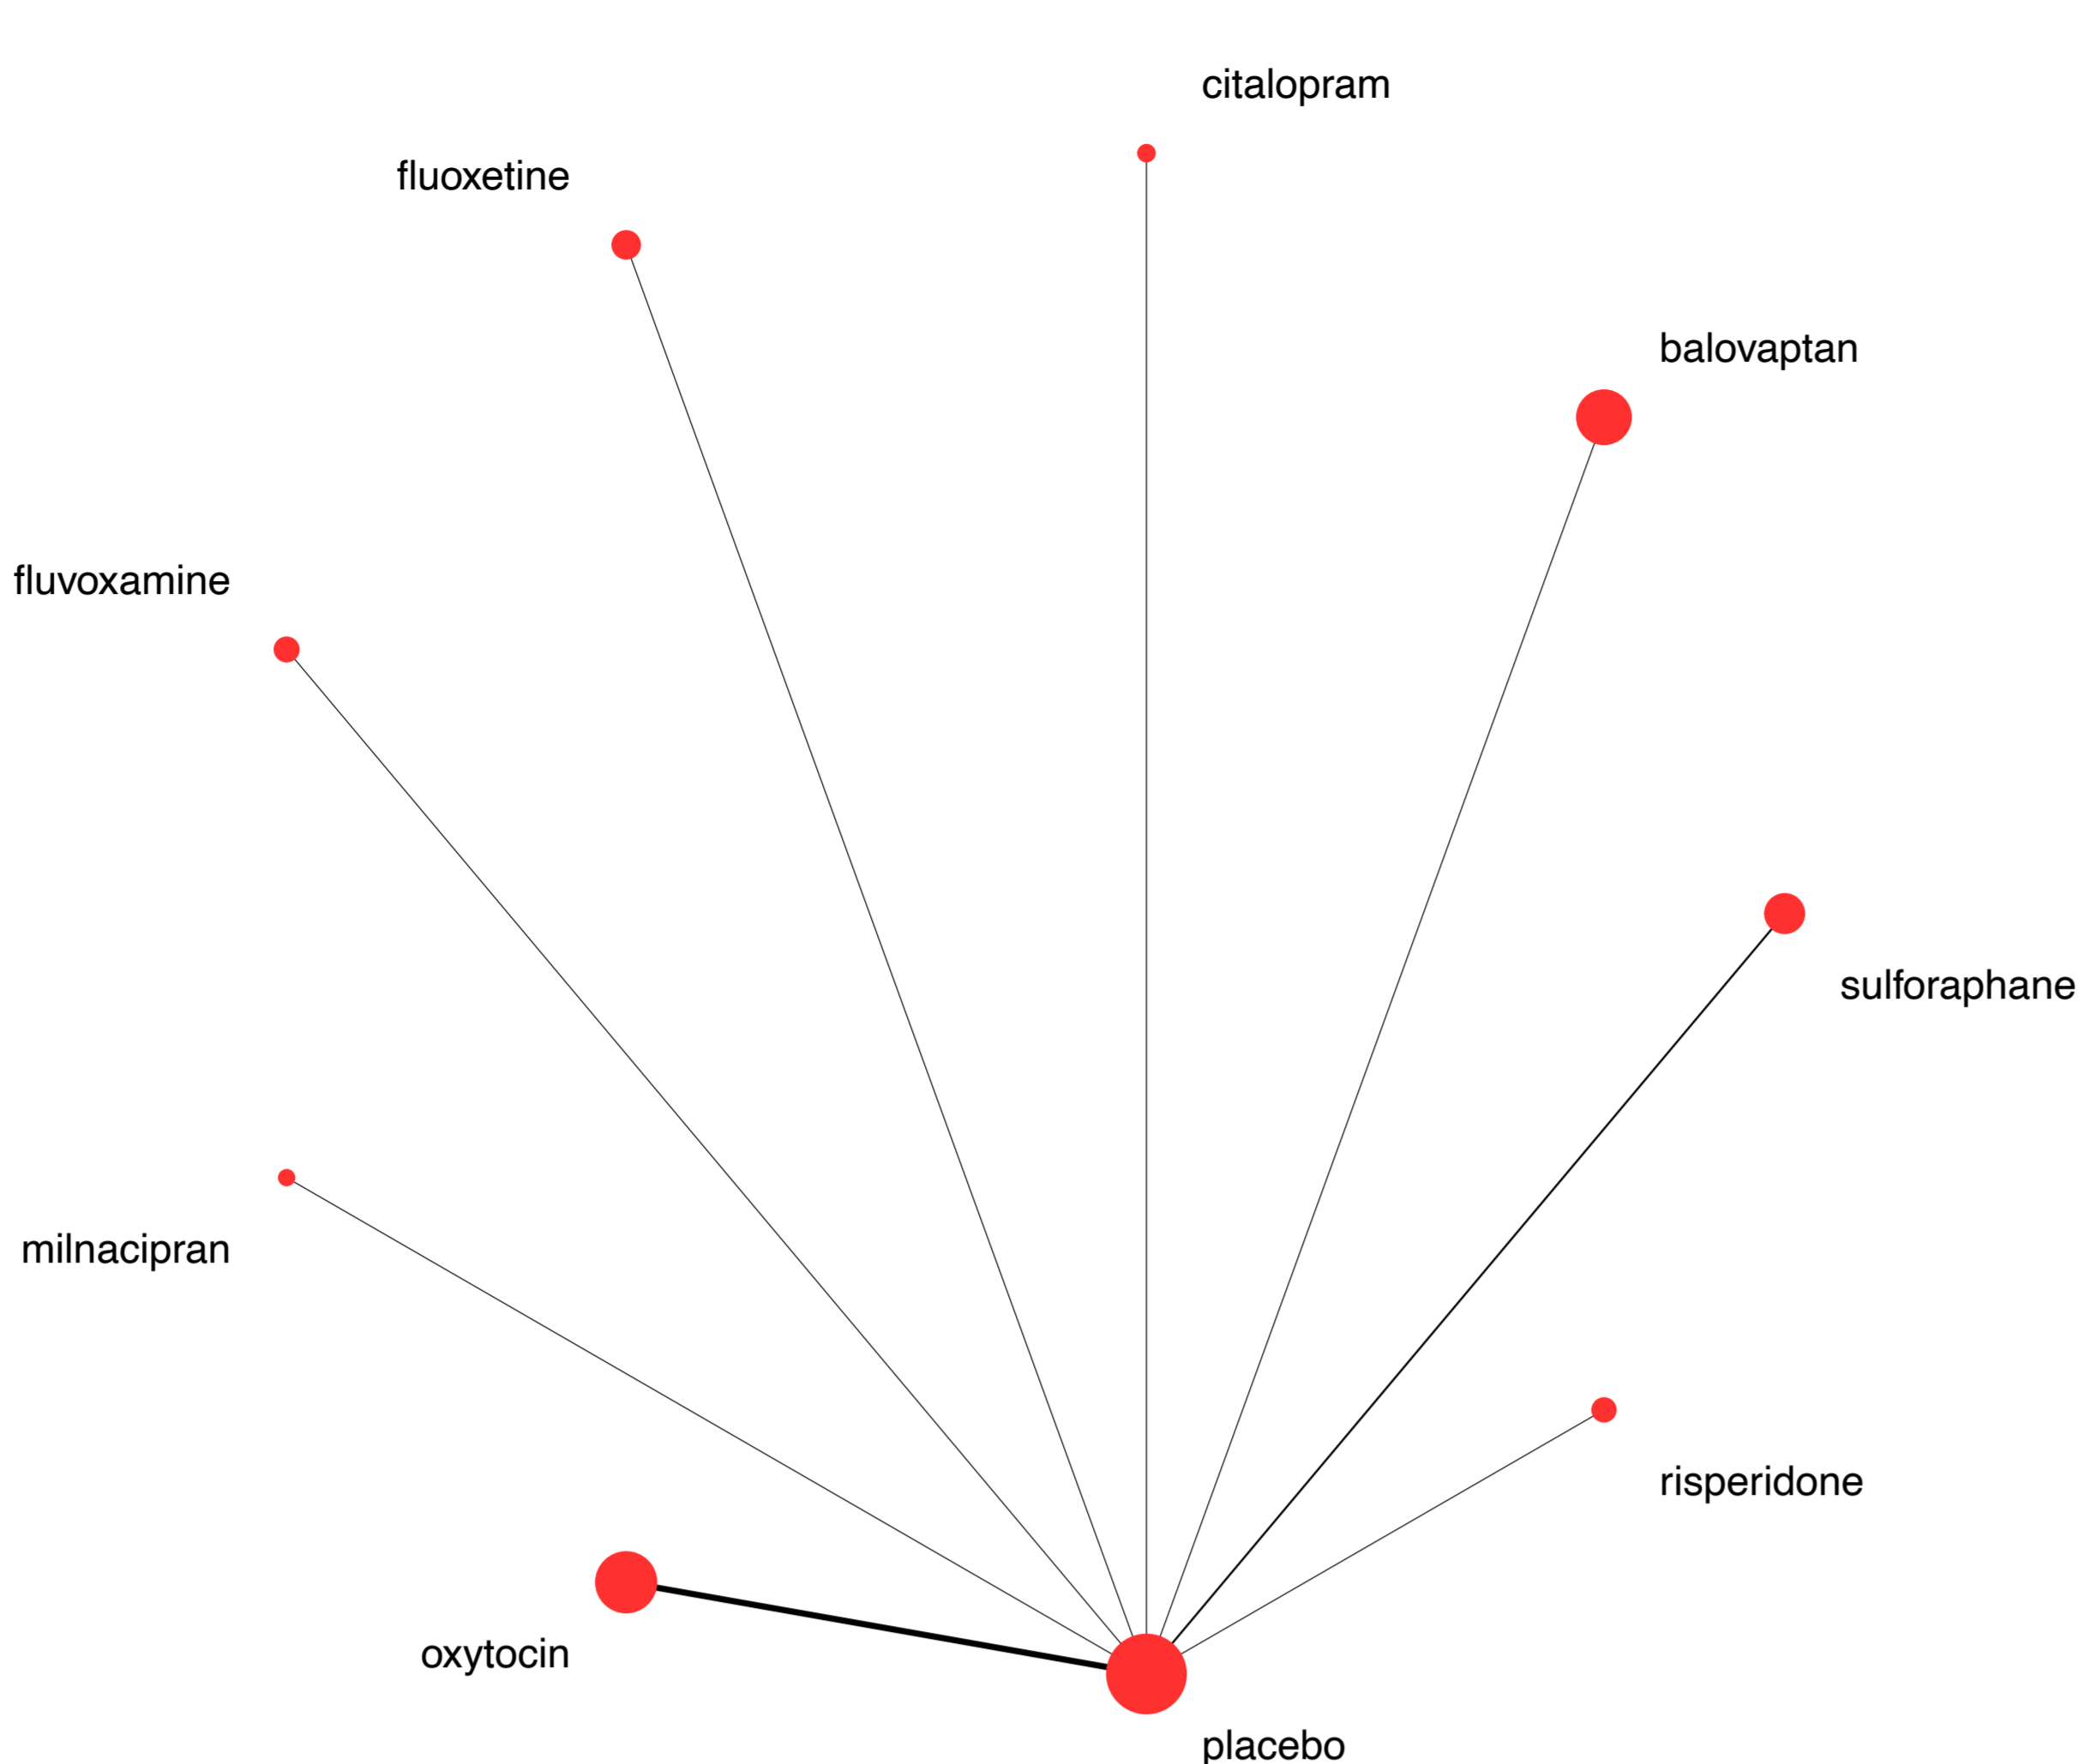

Overall core symptoms

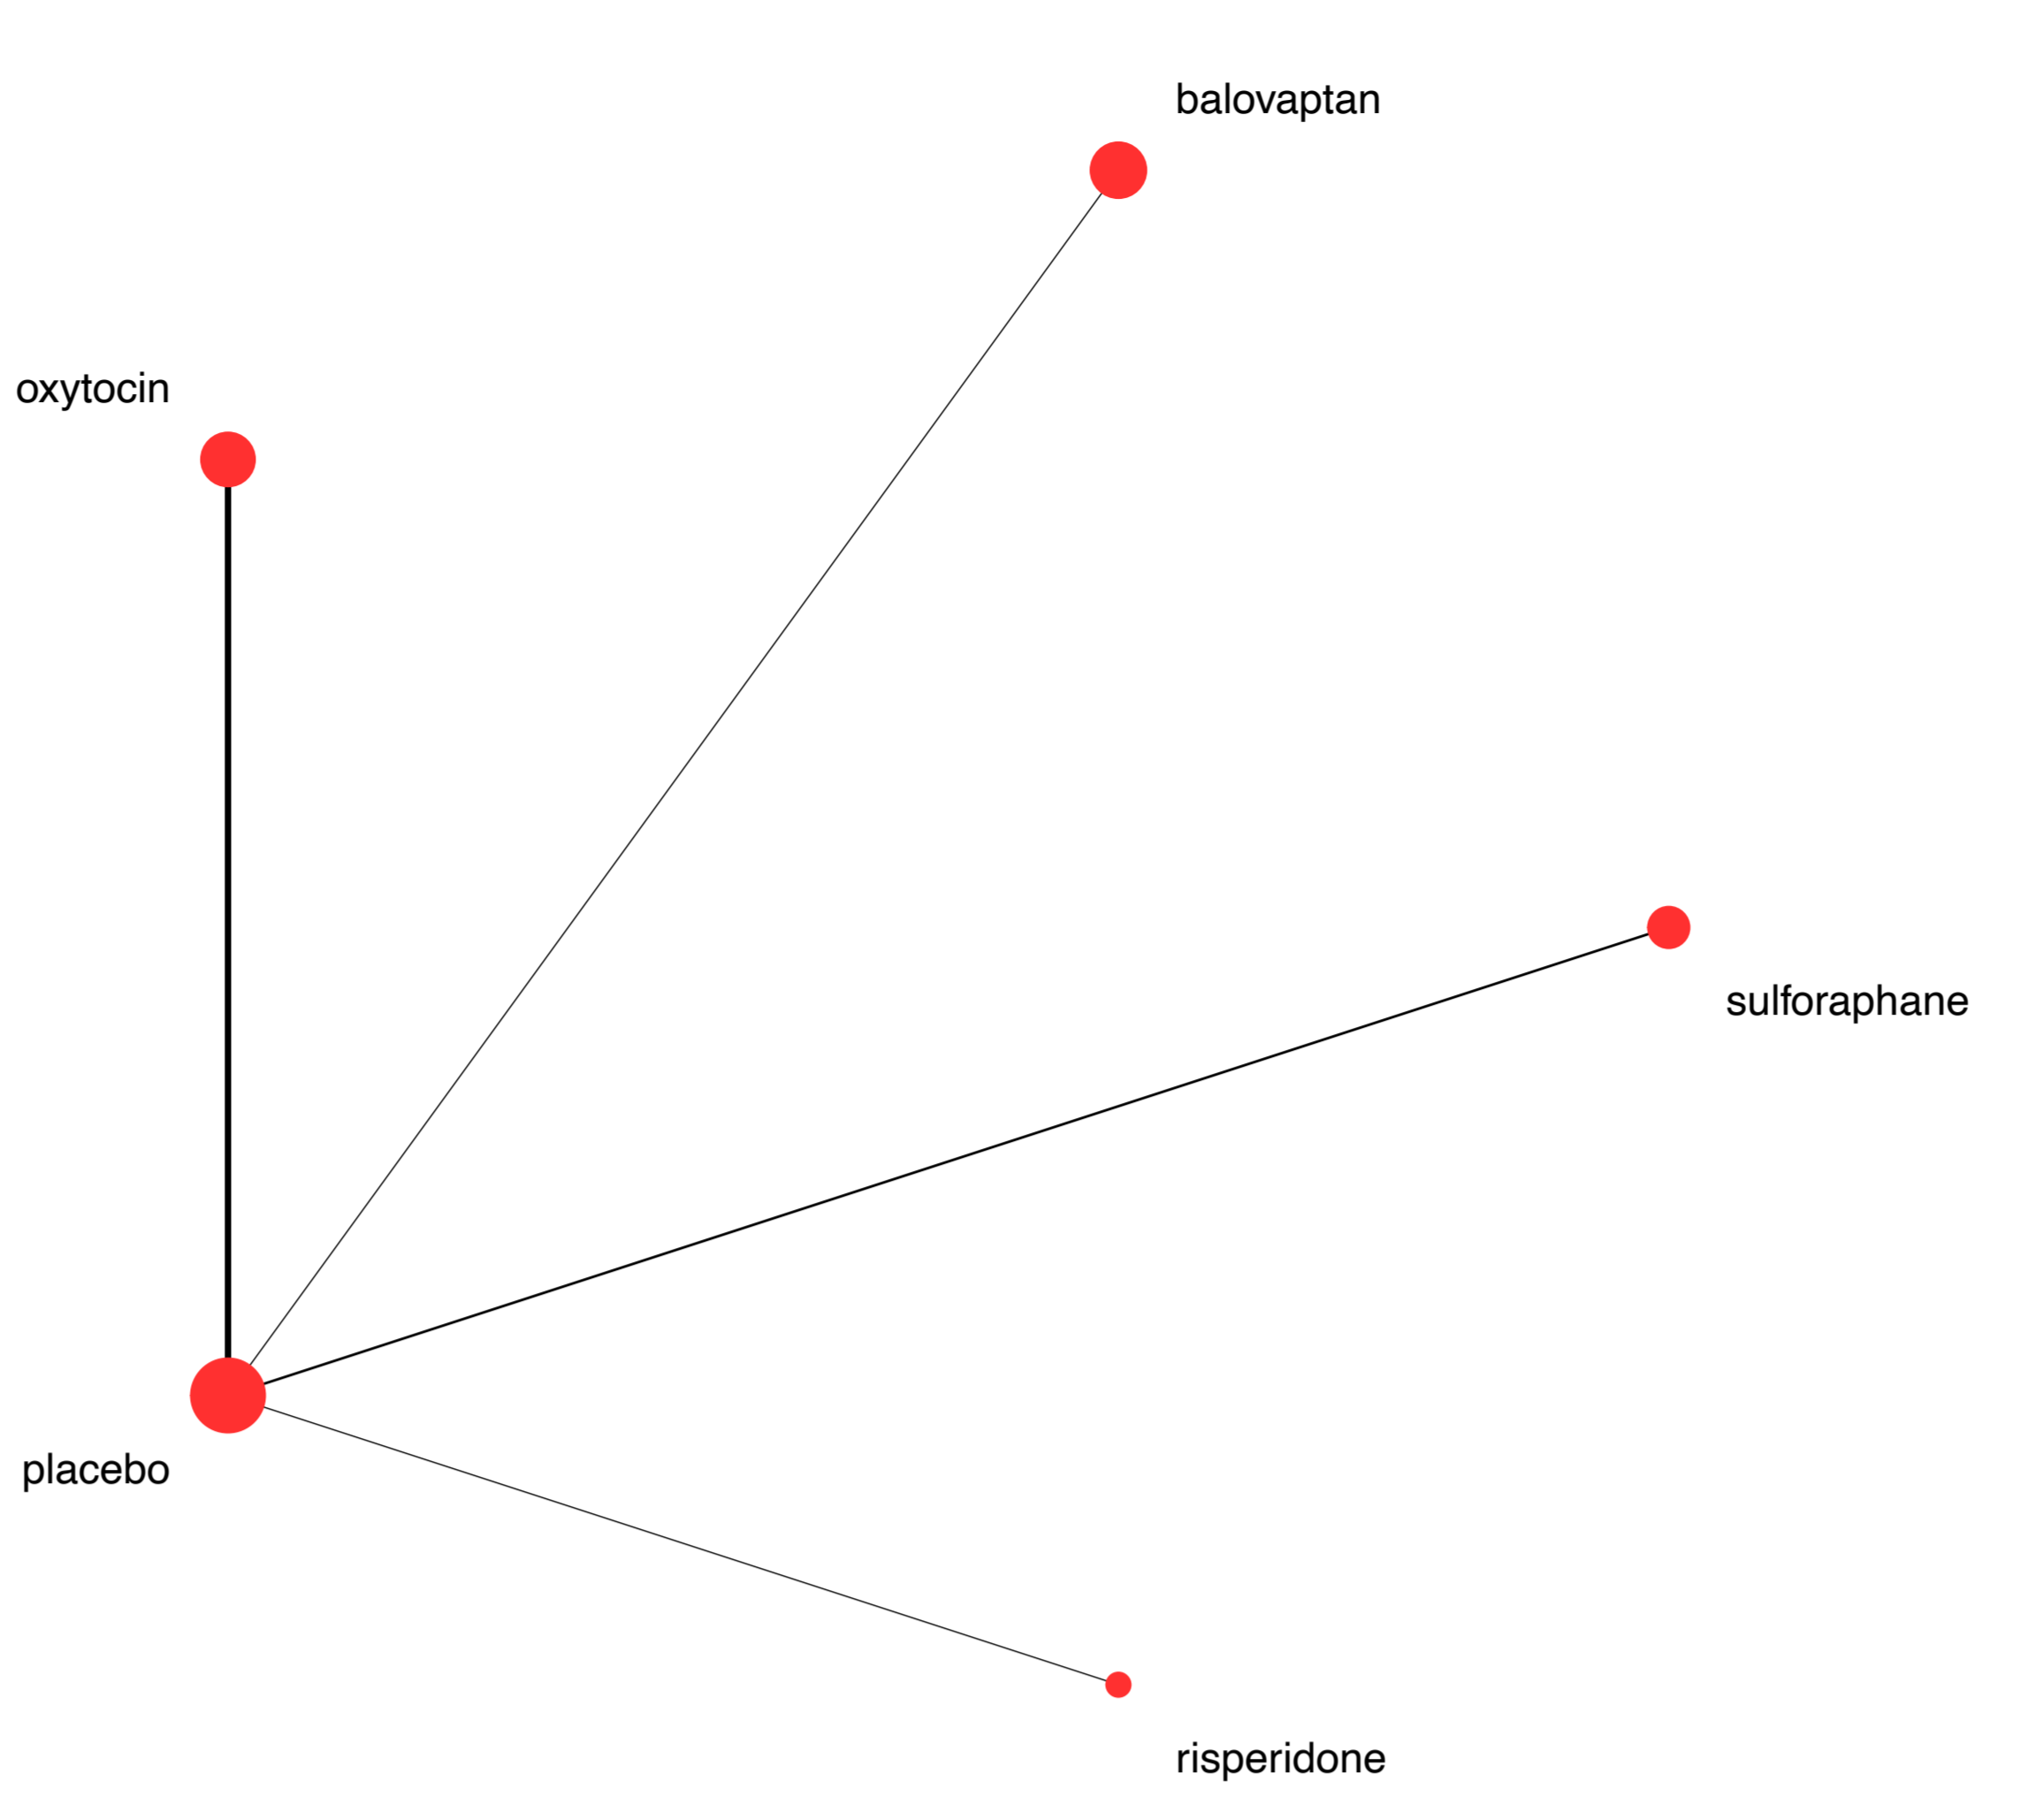

Irritability

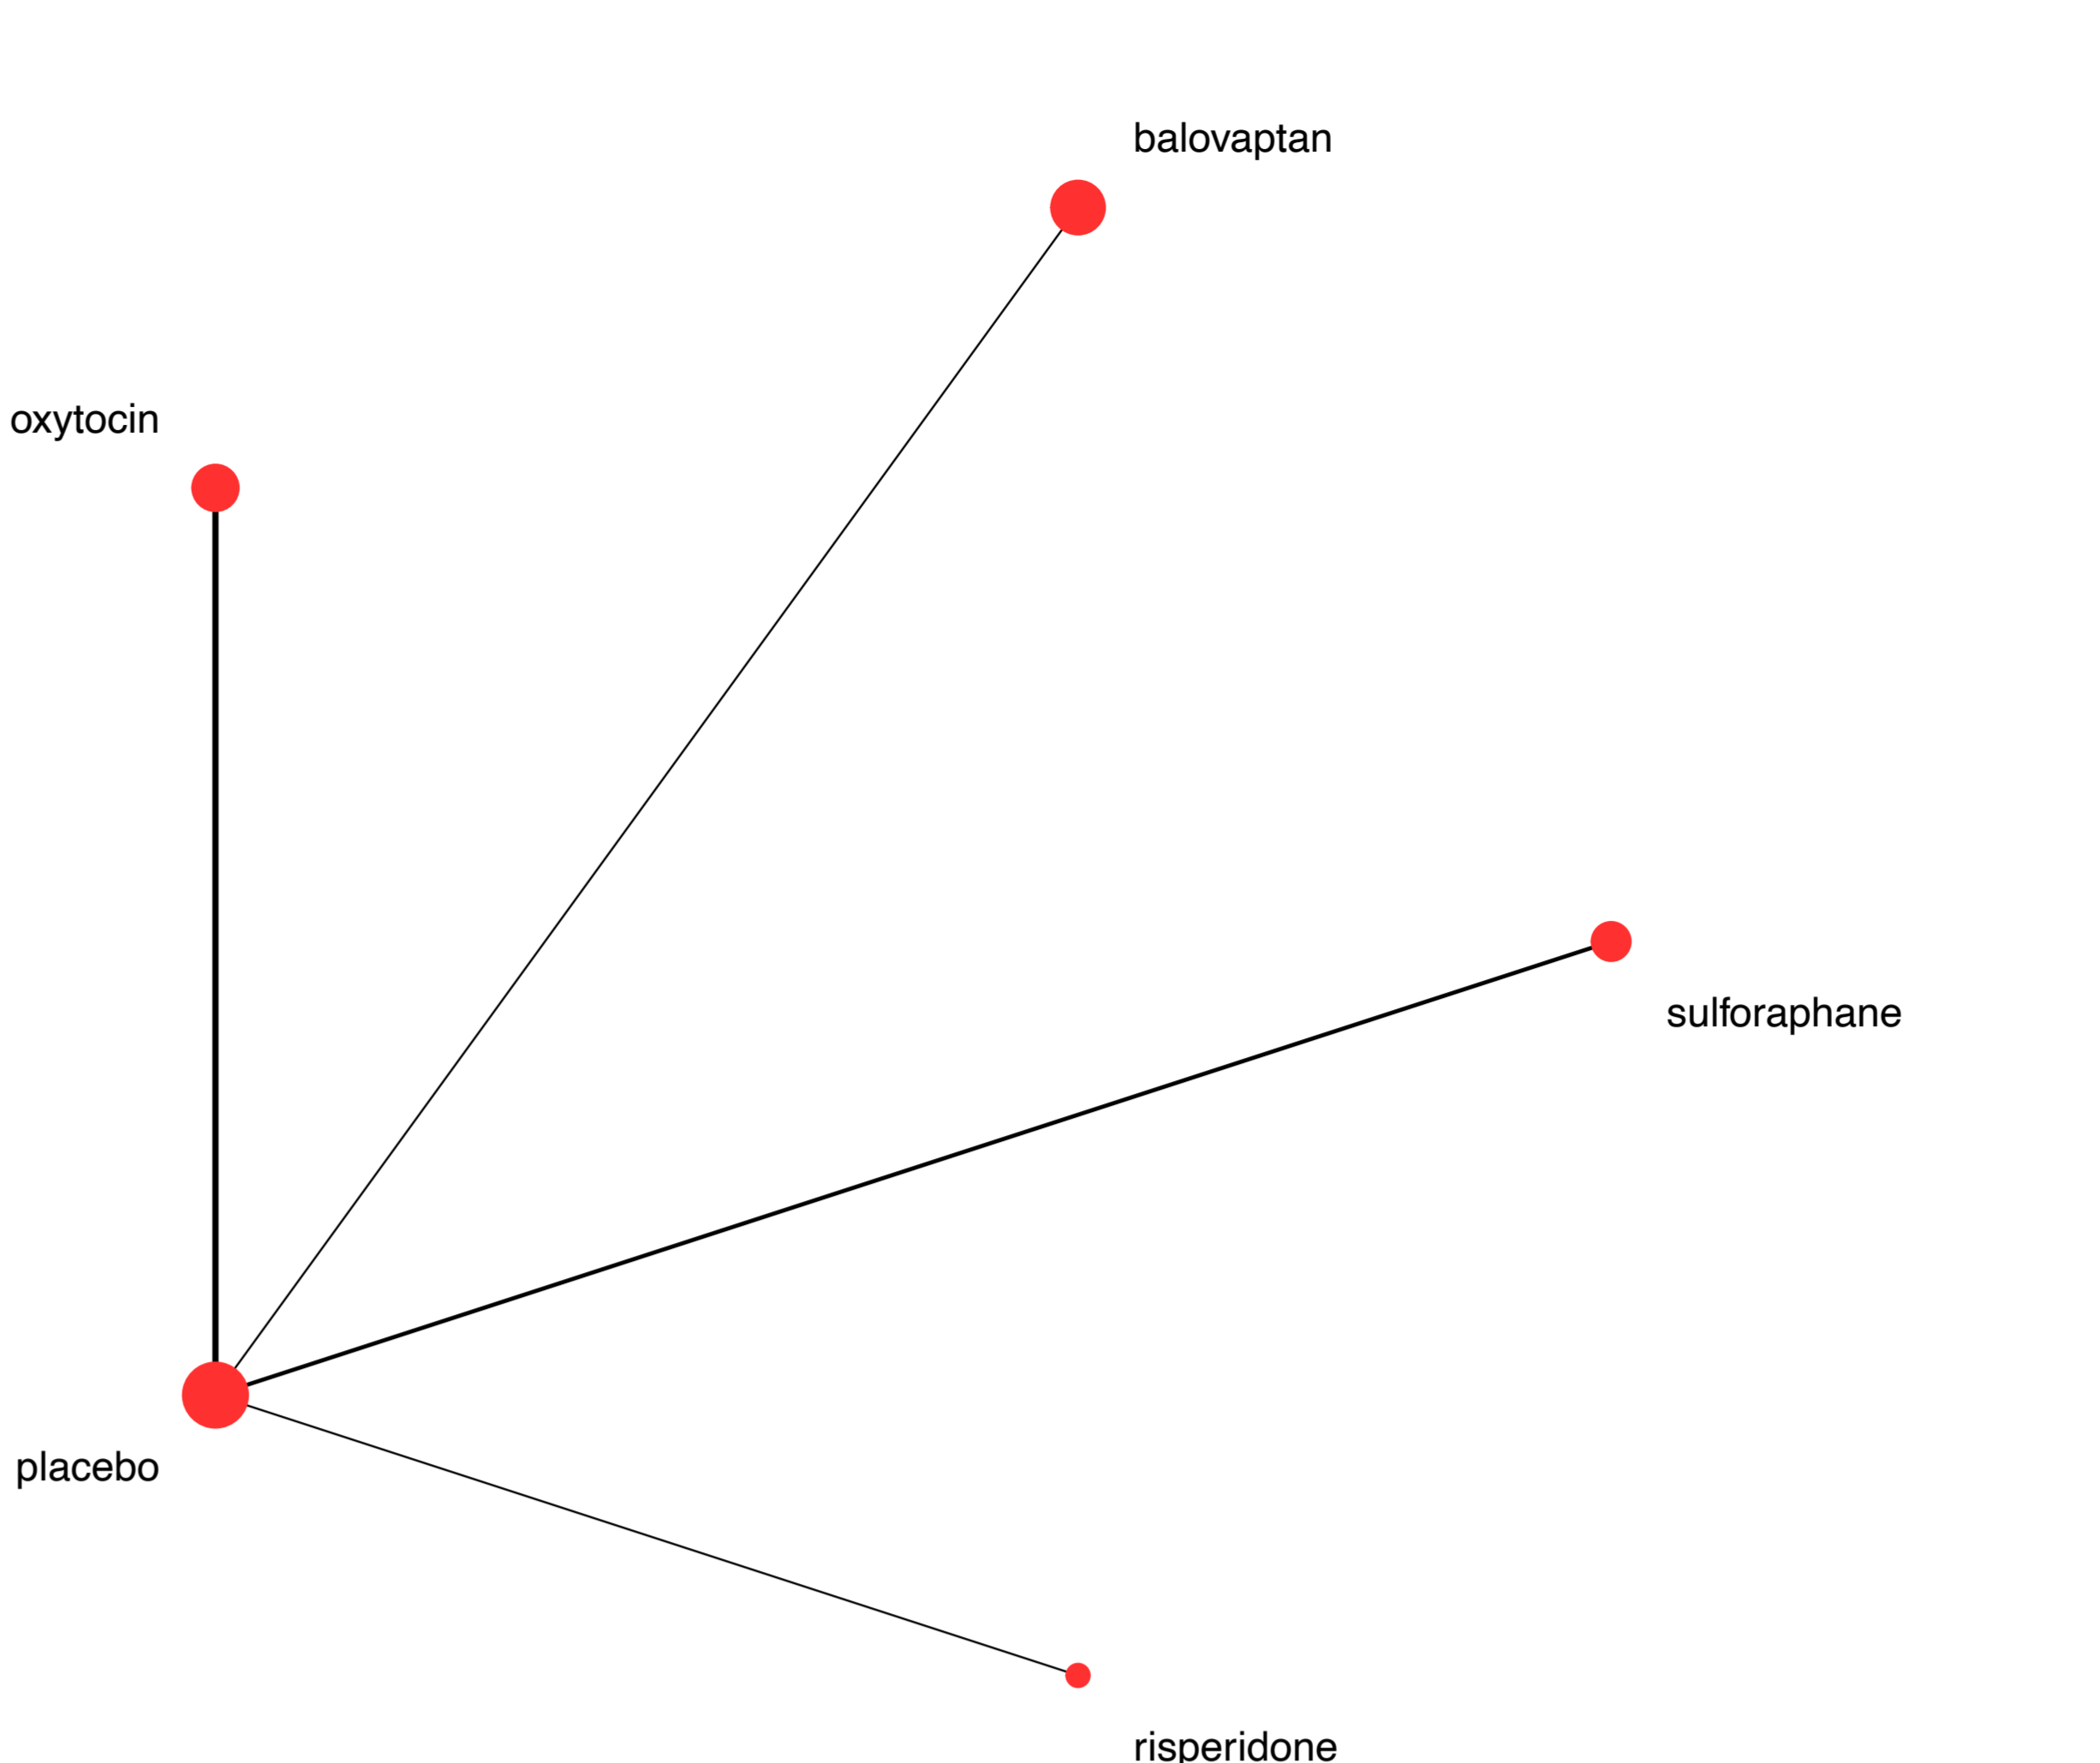

ADHD symptoms

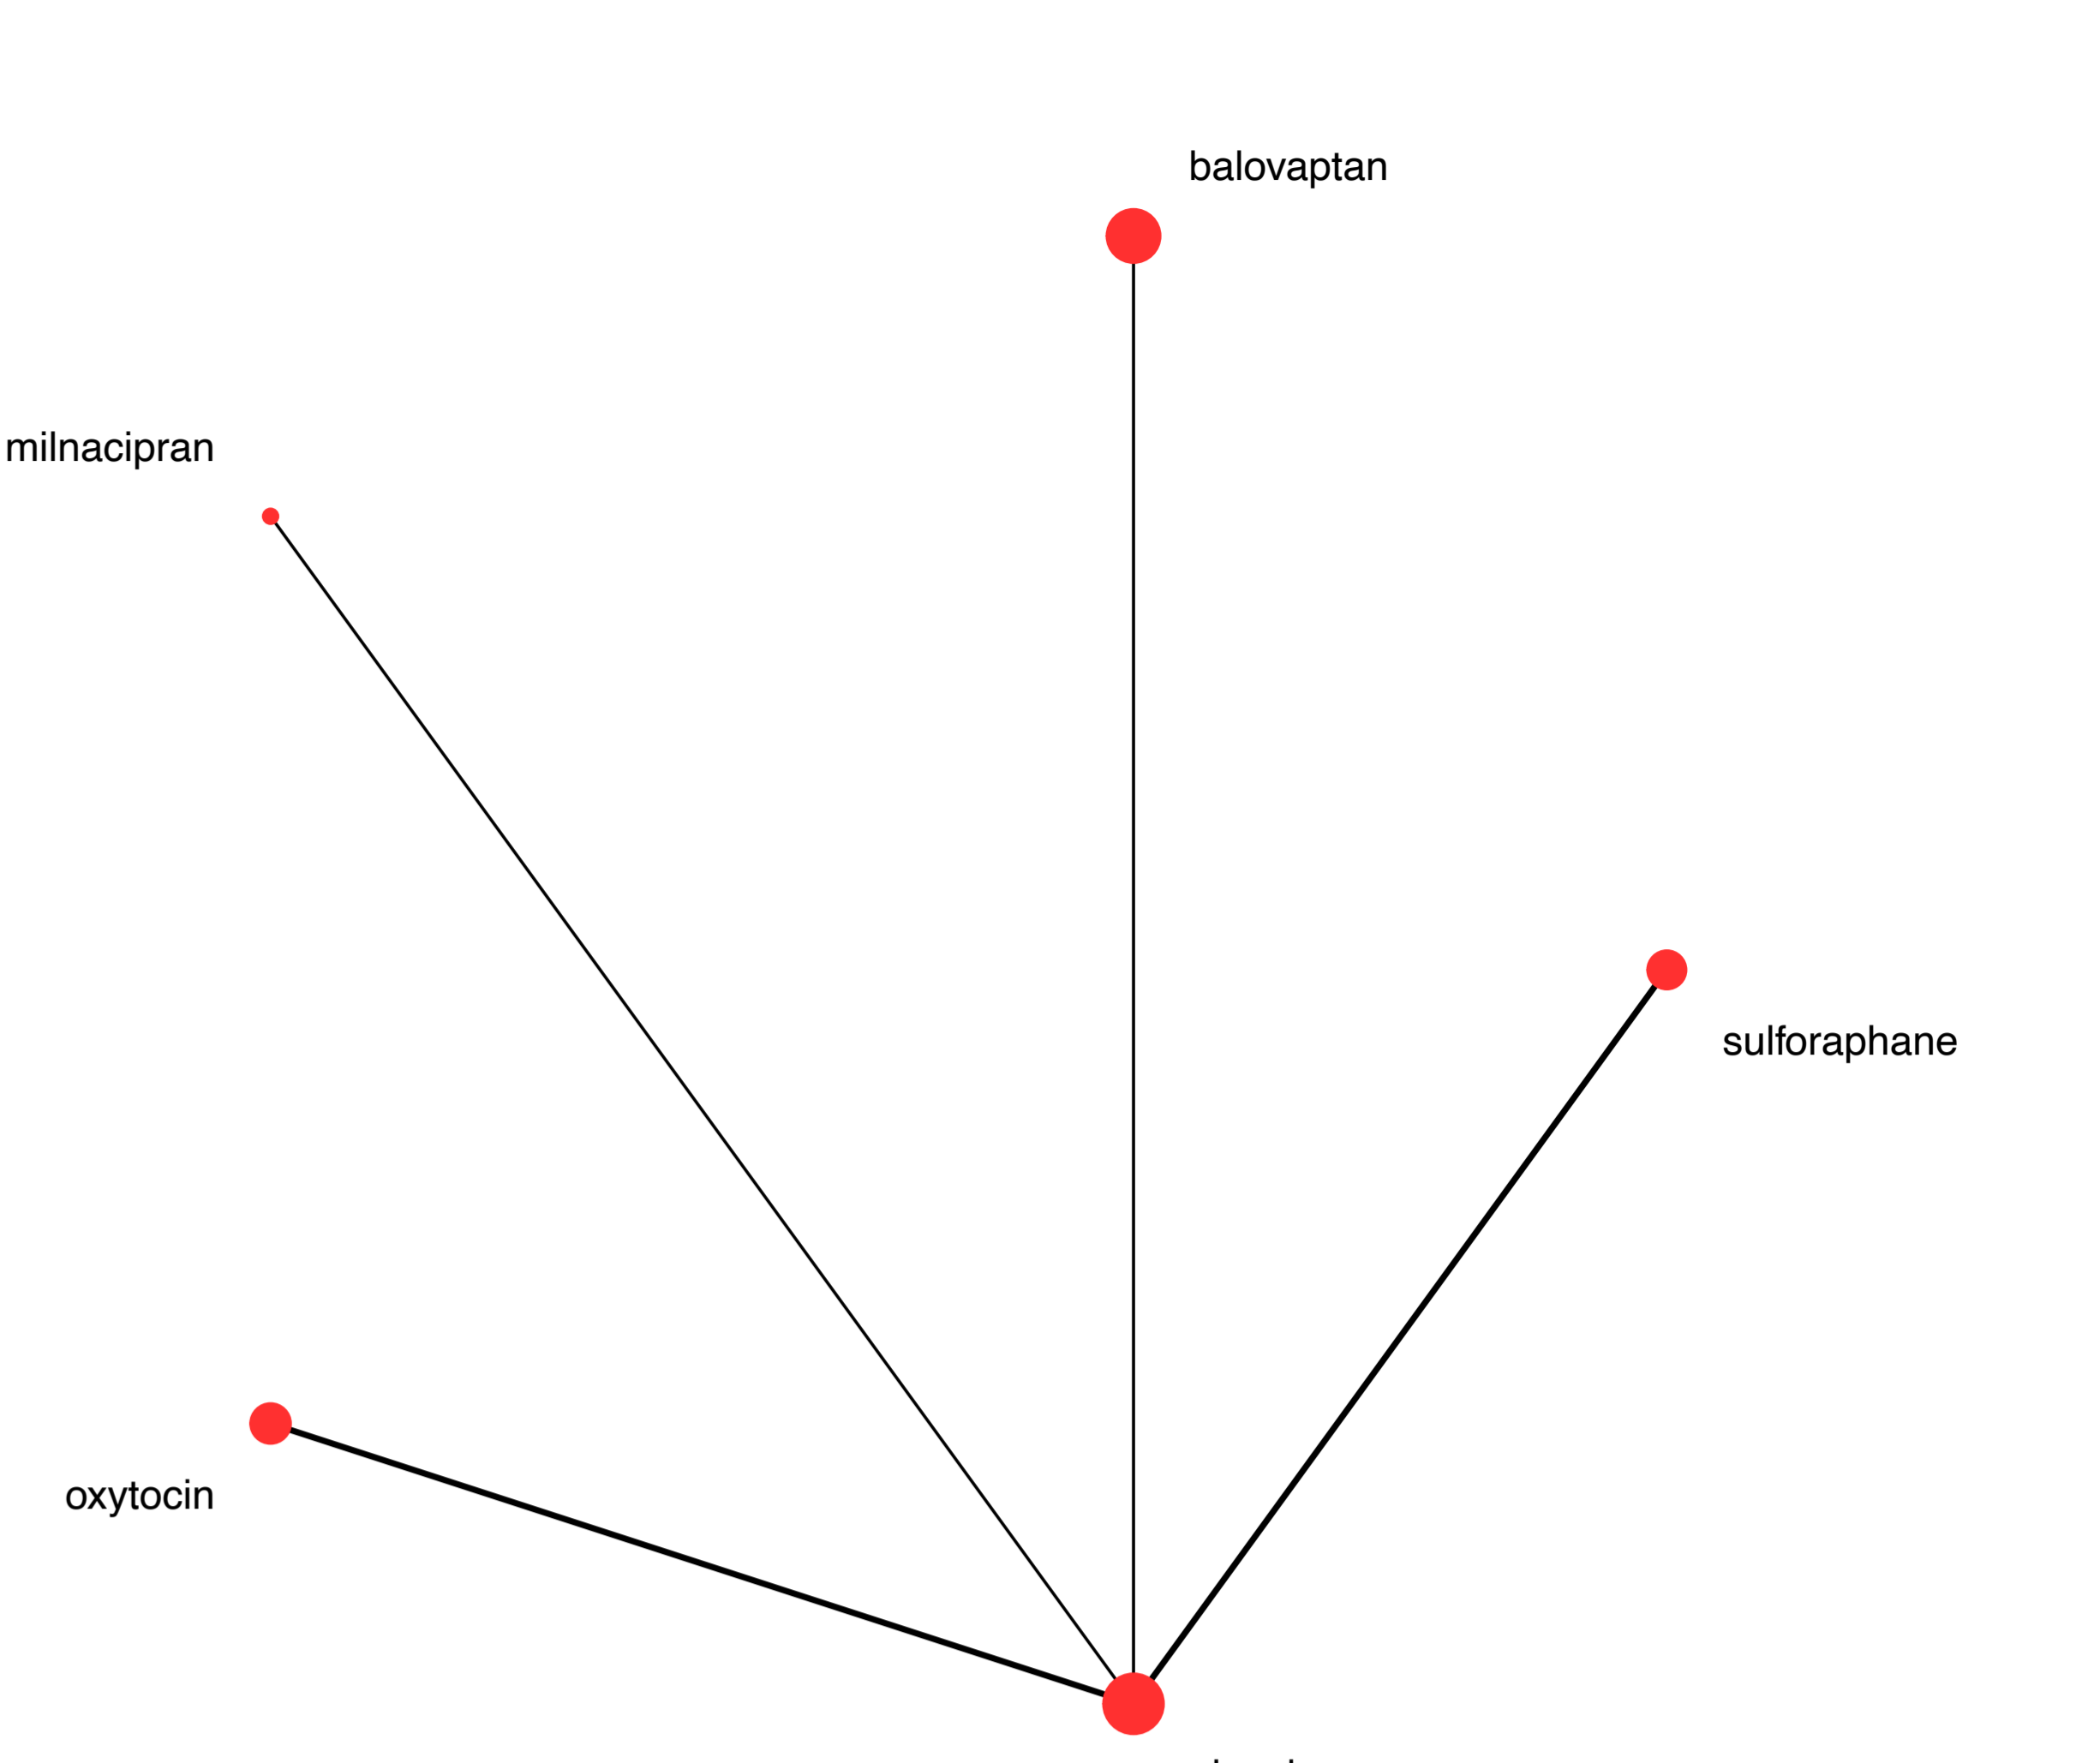

Anxiety/depressive symptoms

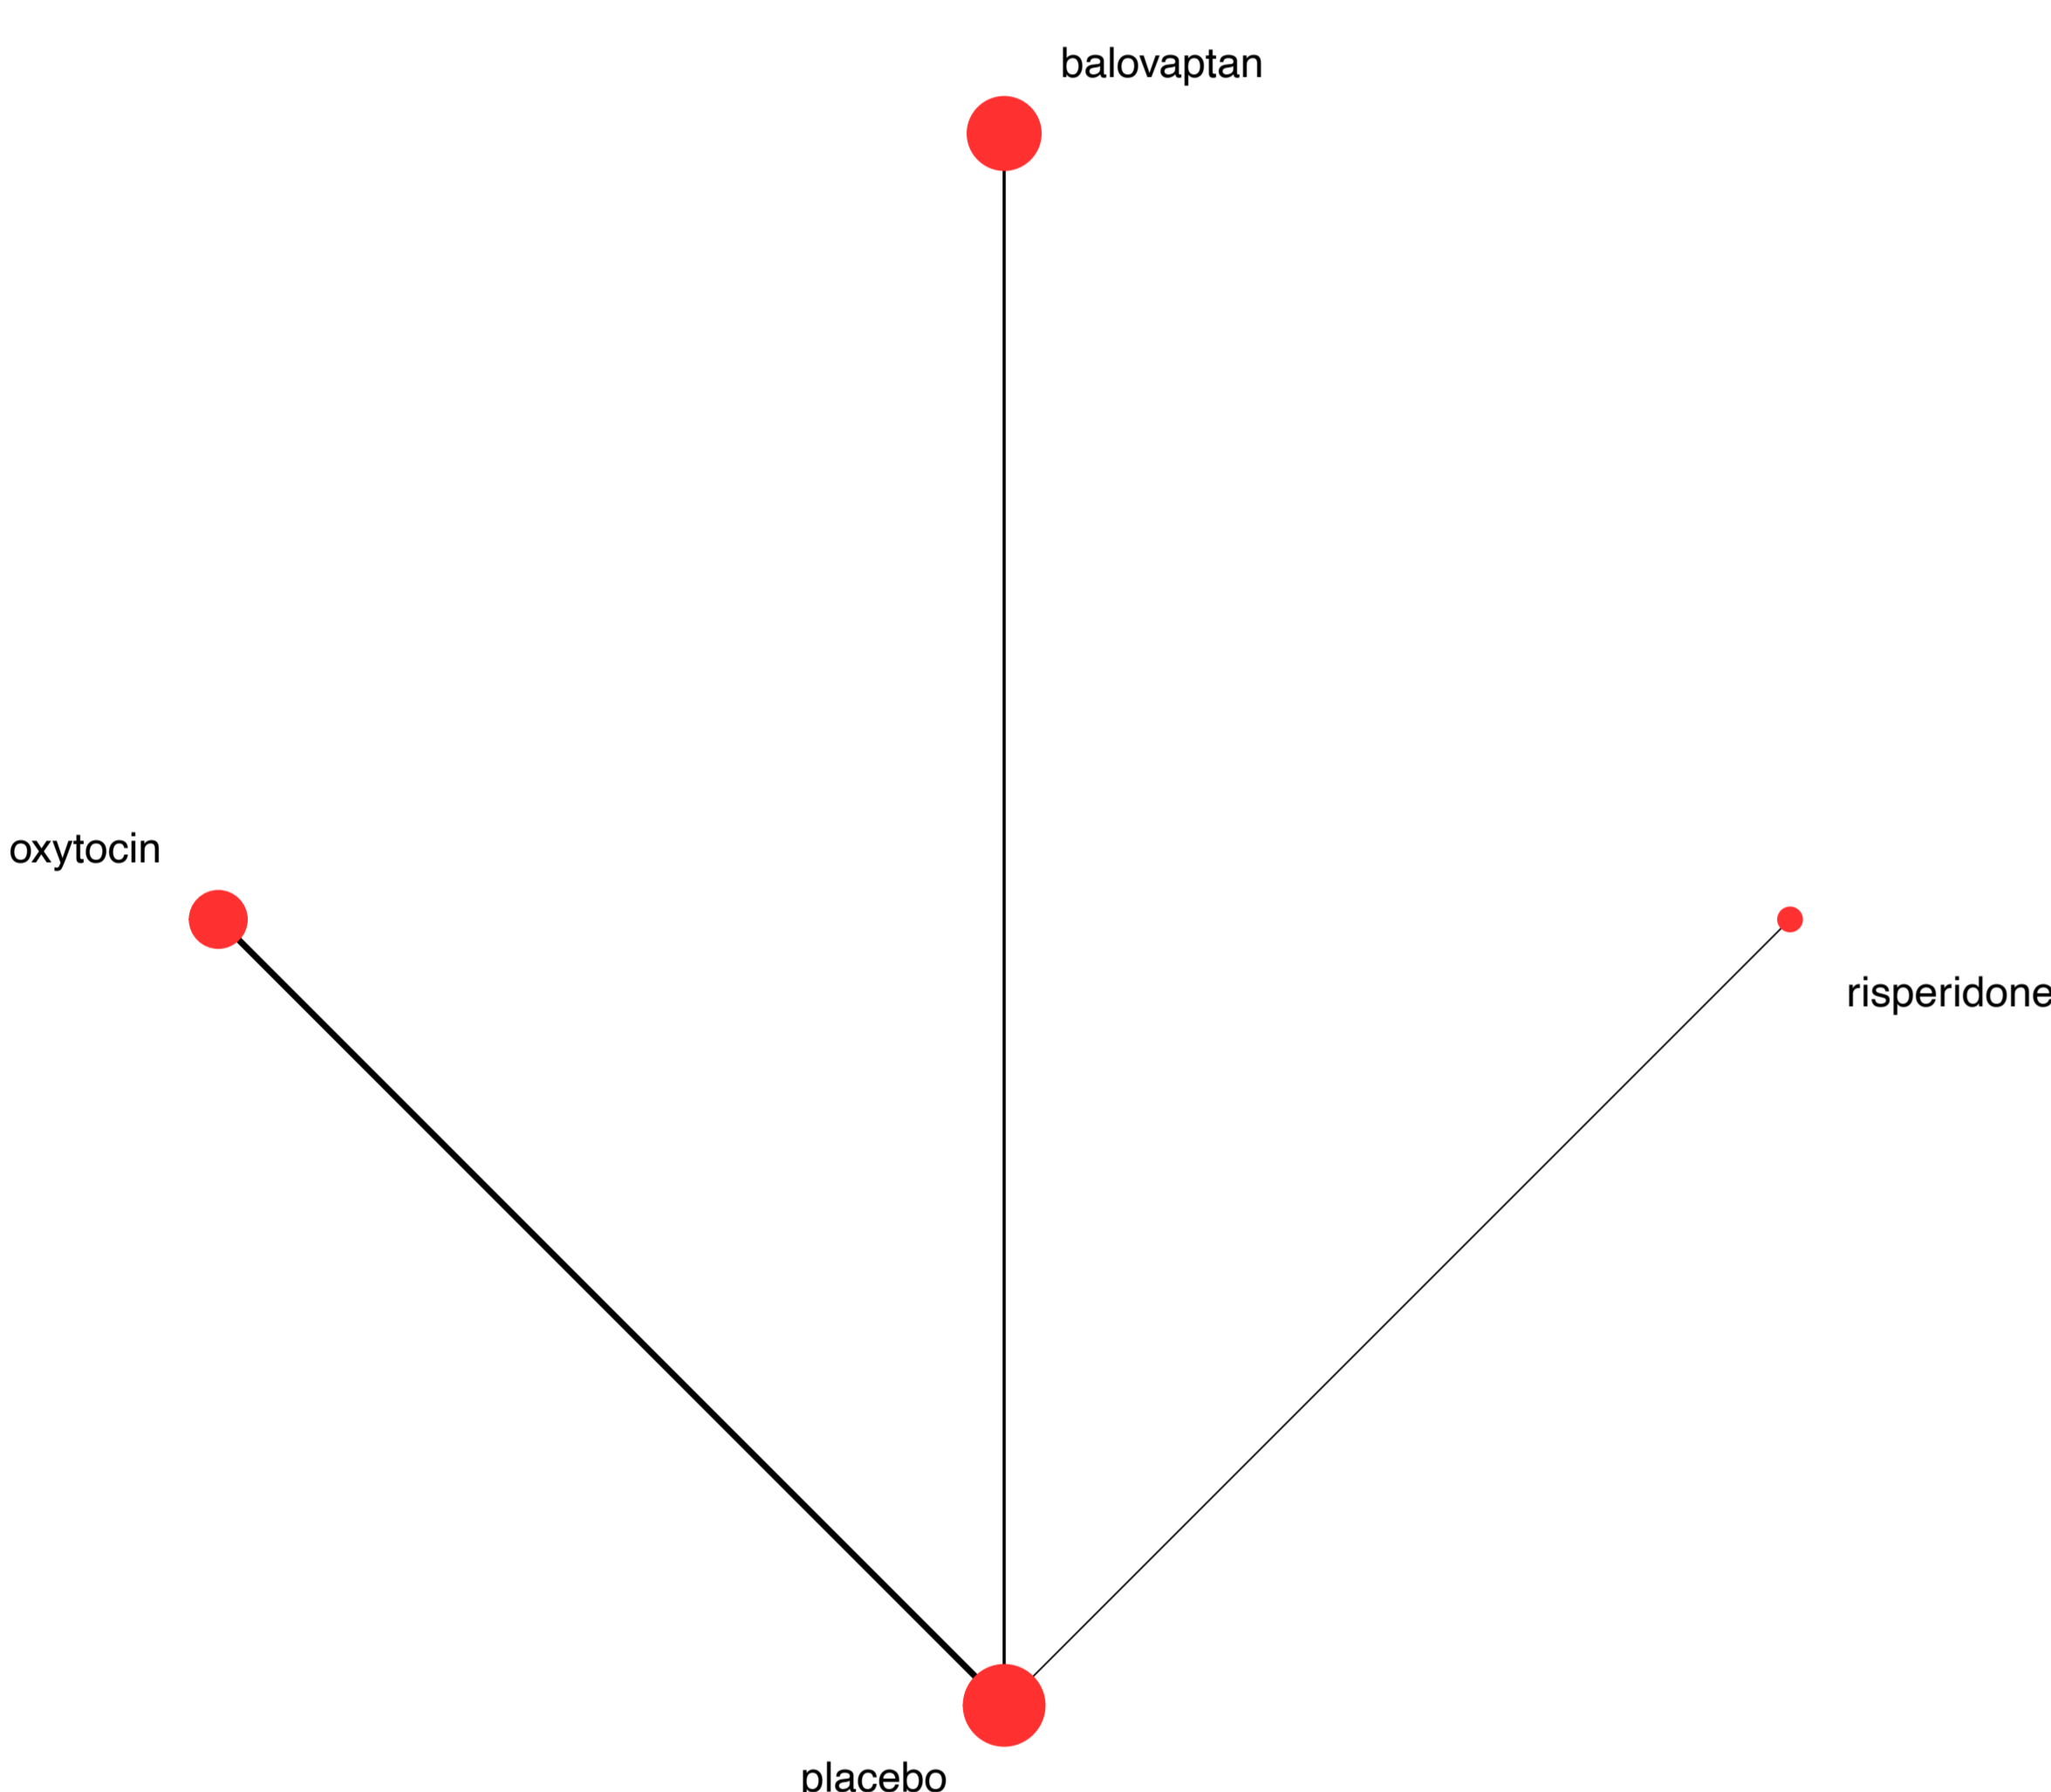

Caregiver stress

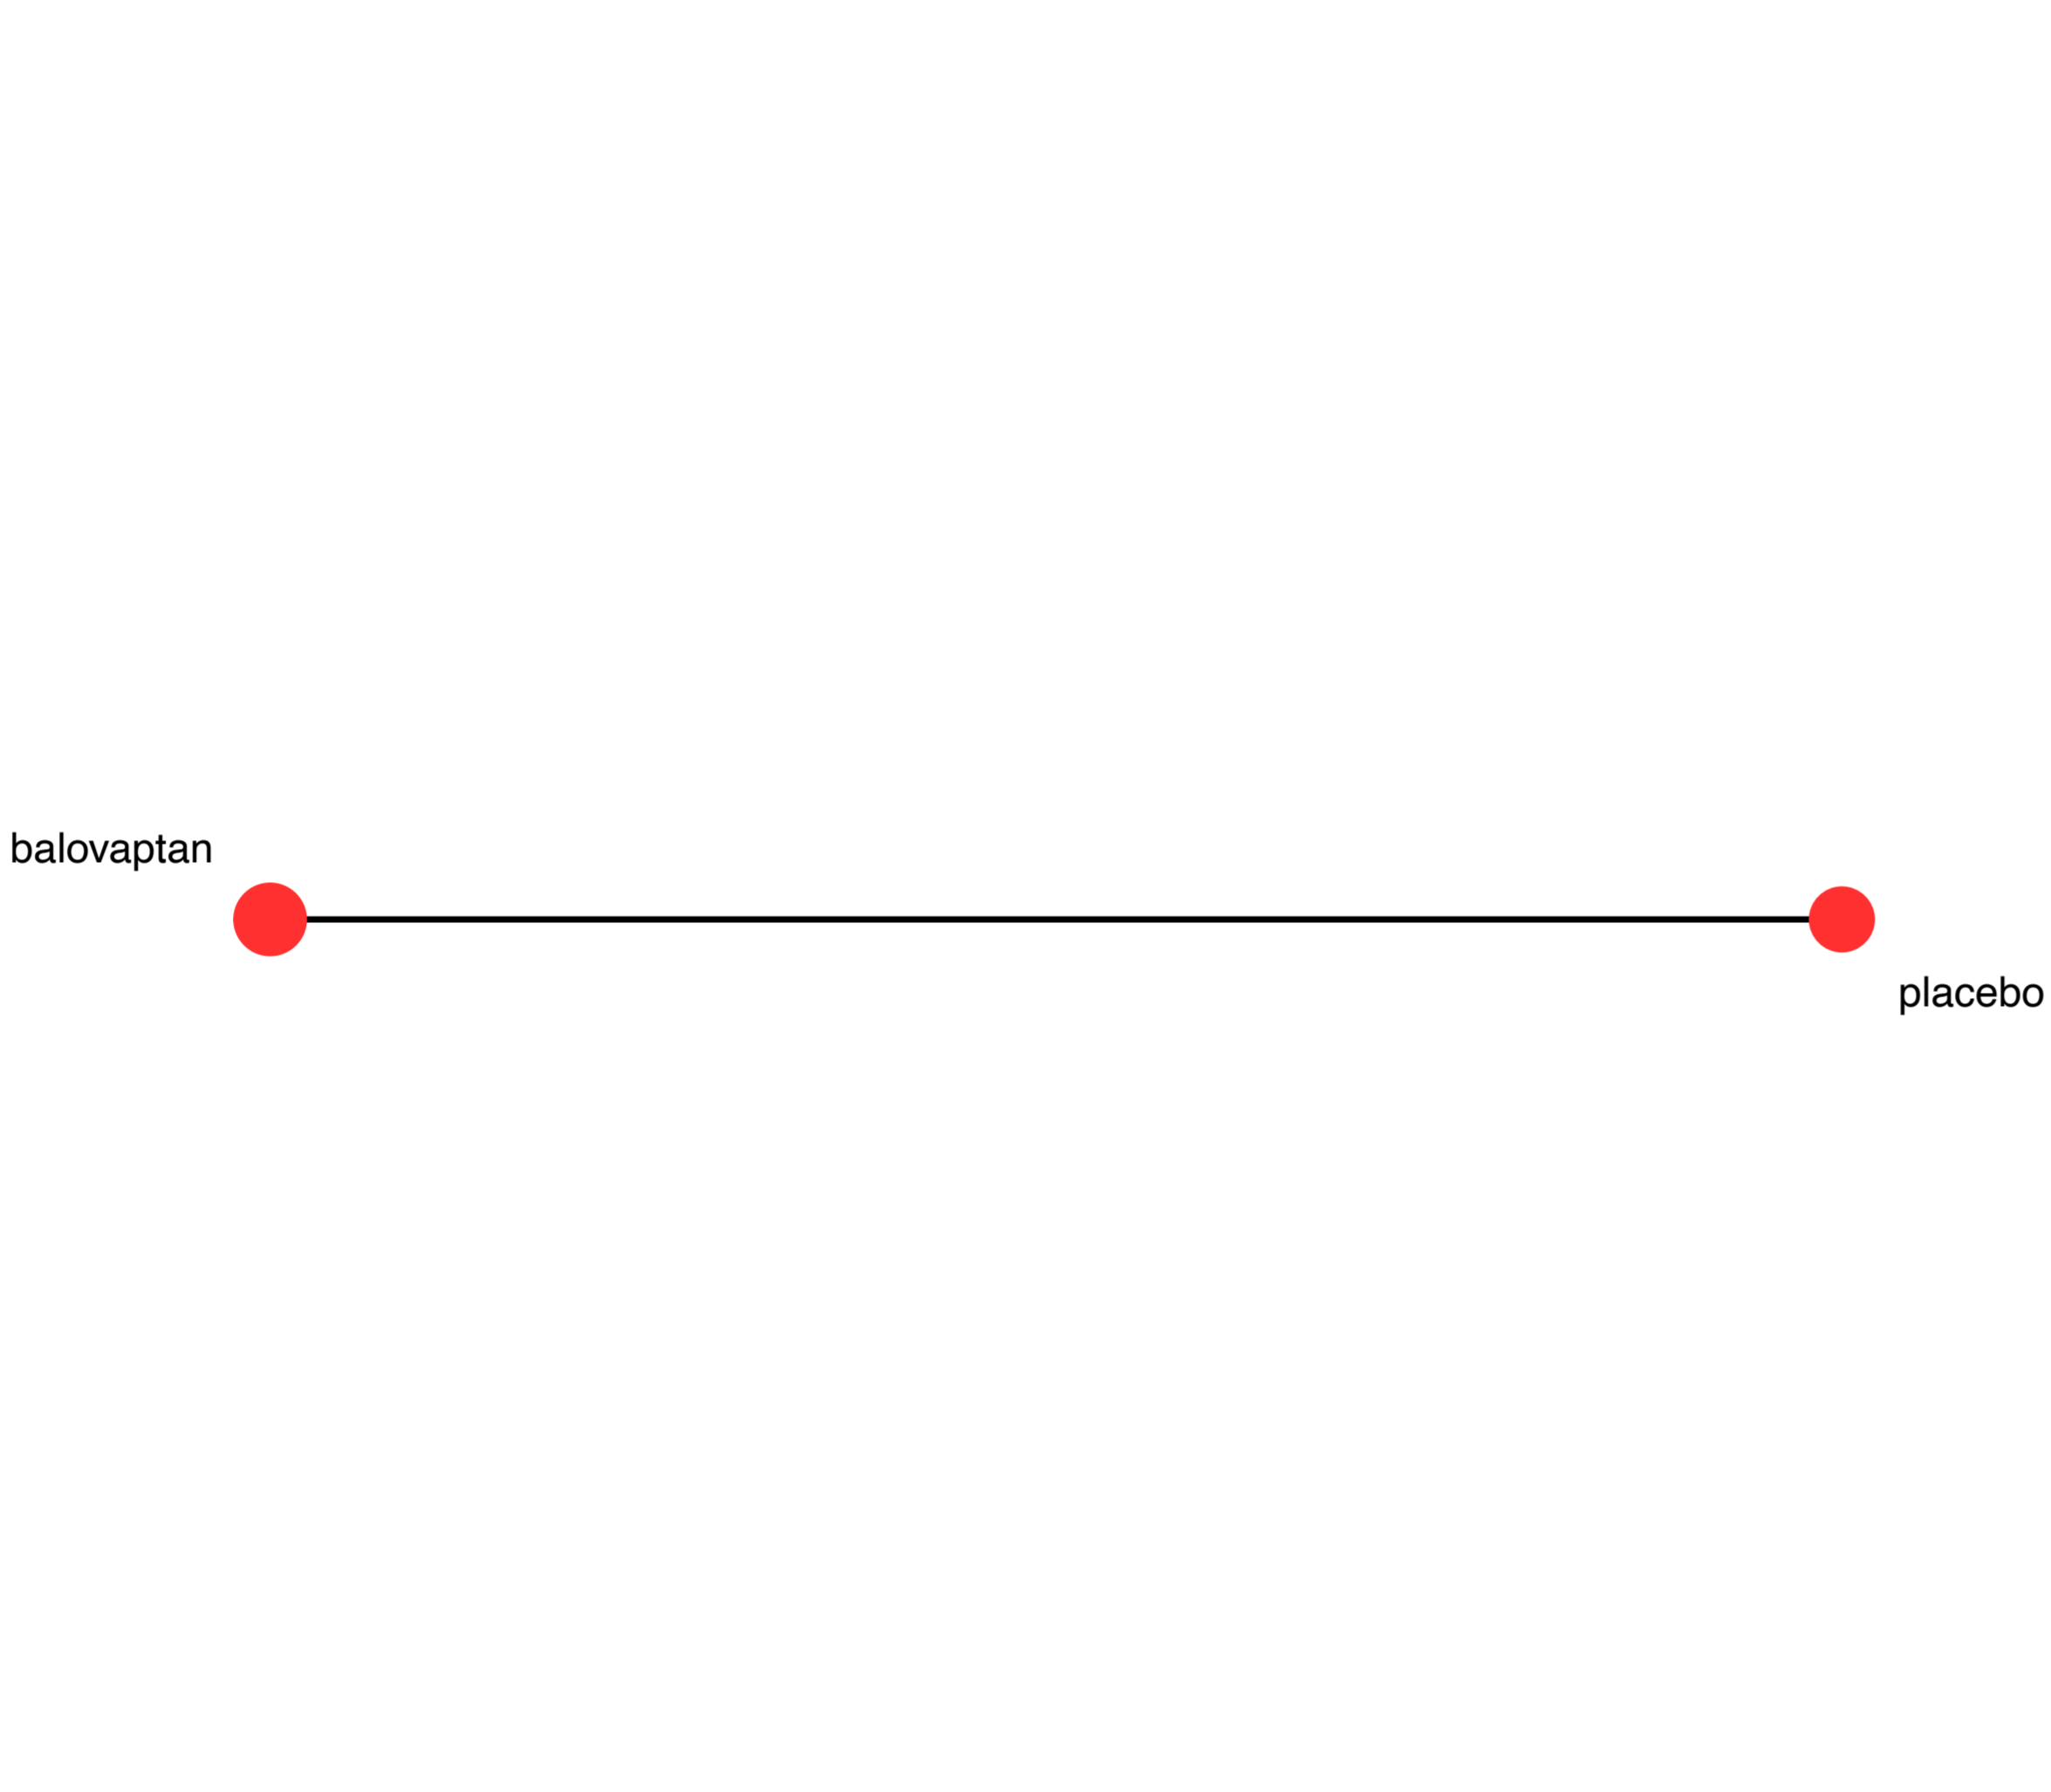

Quality of life

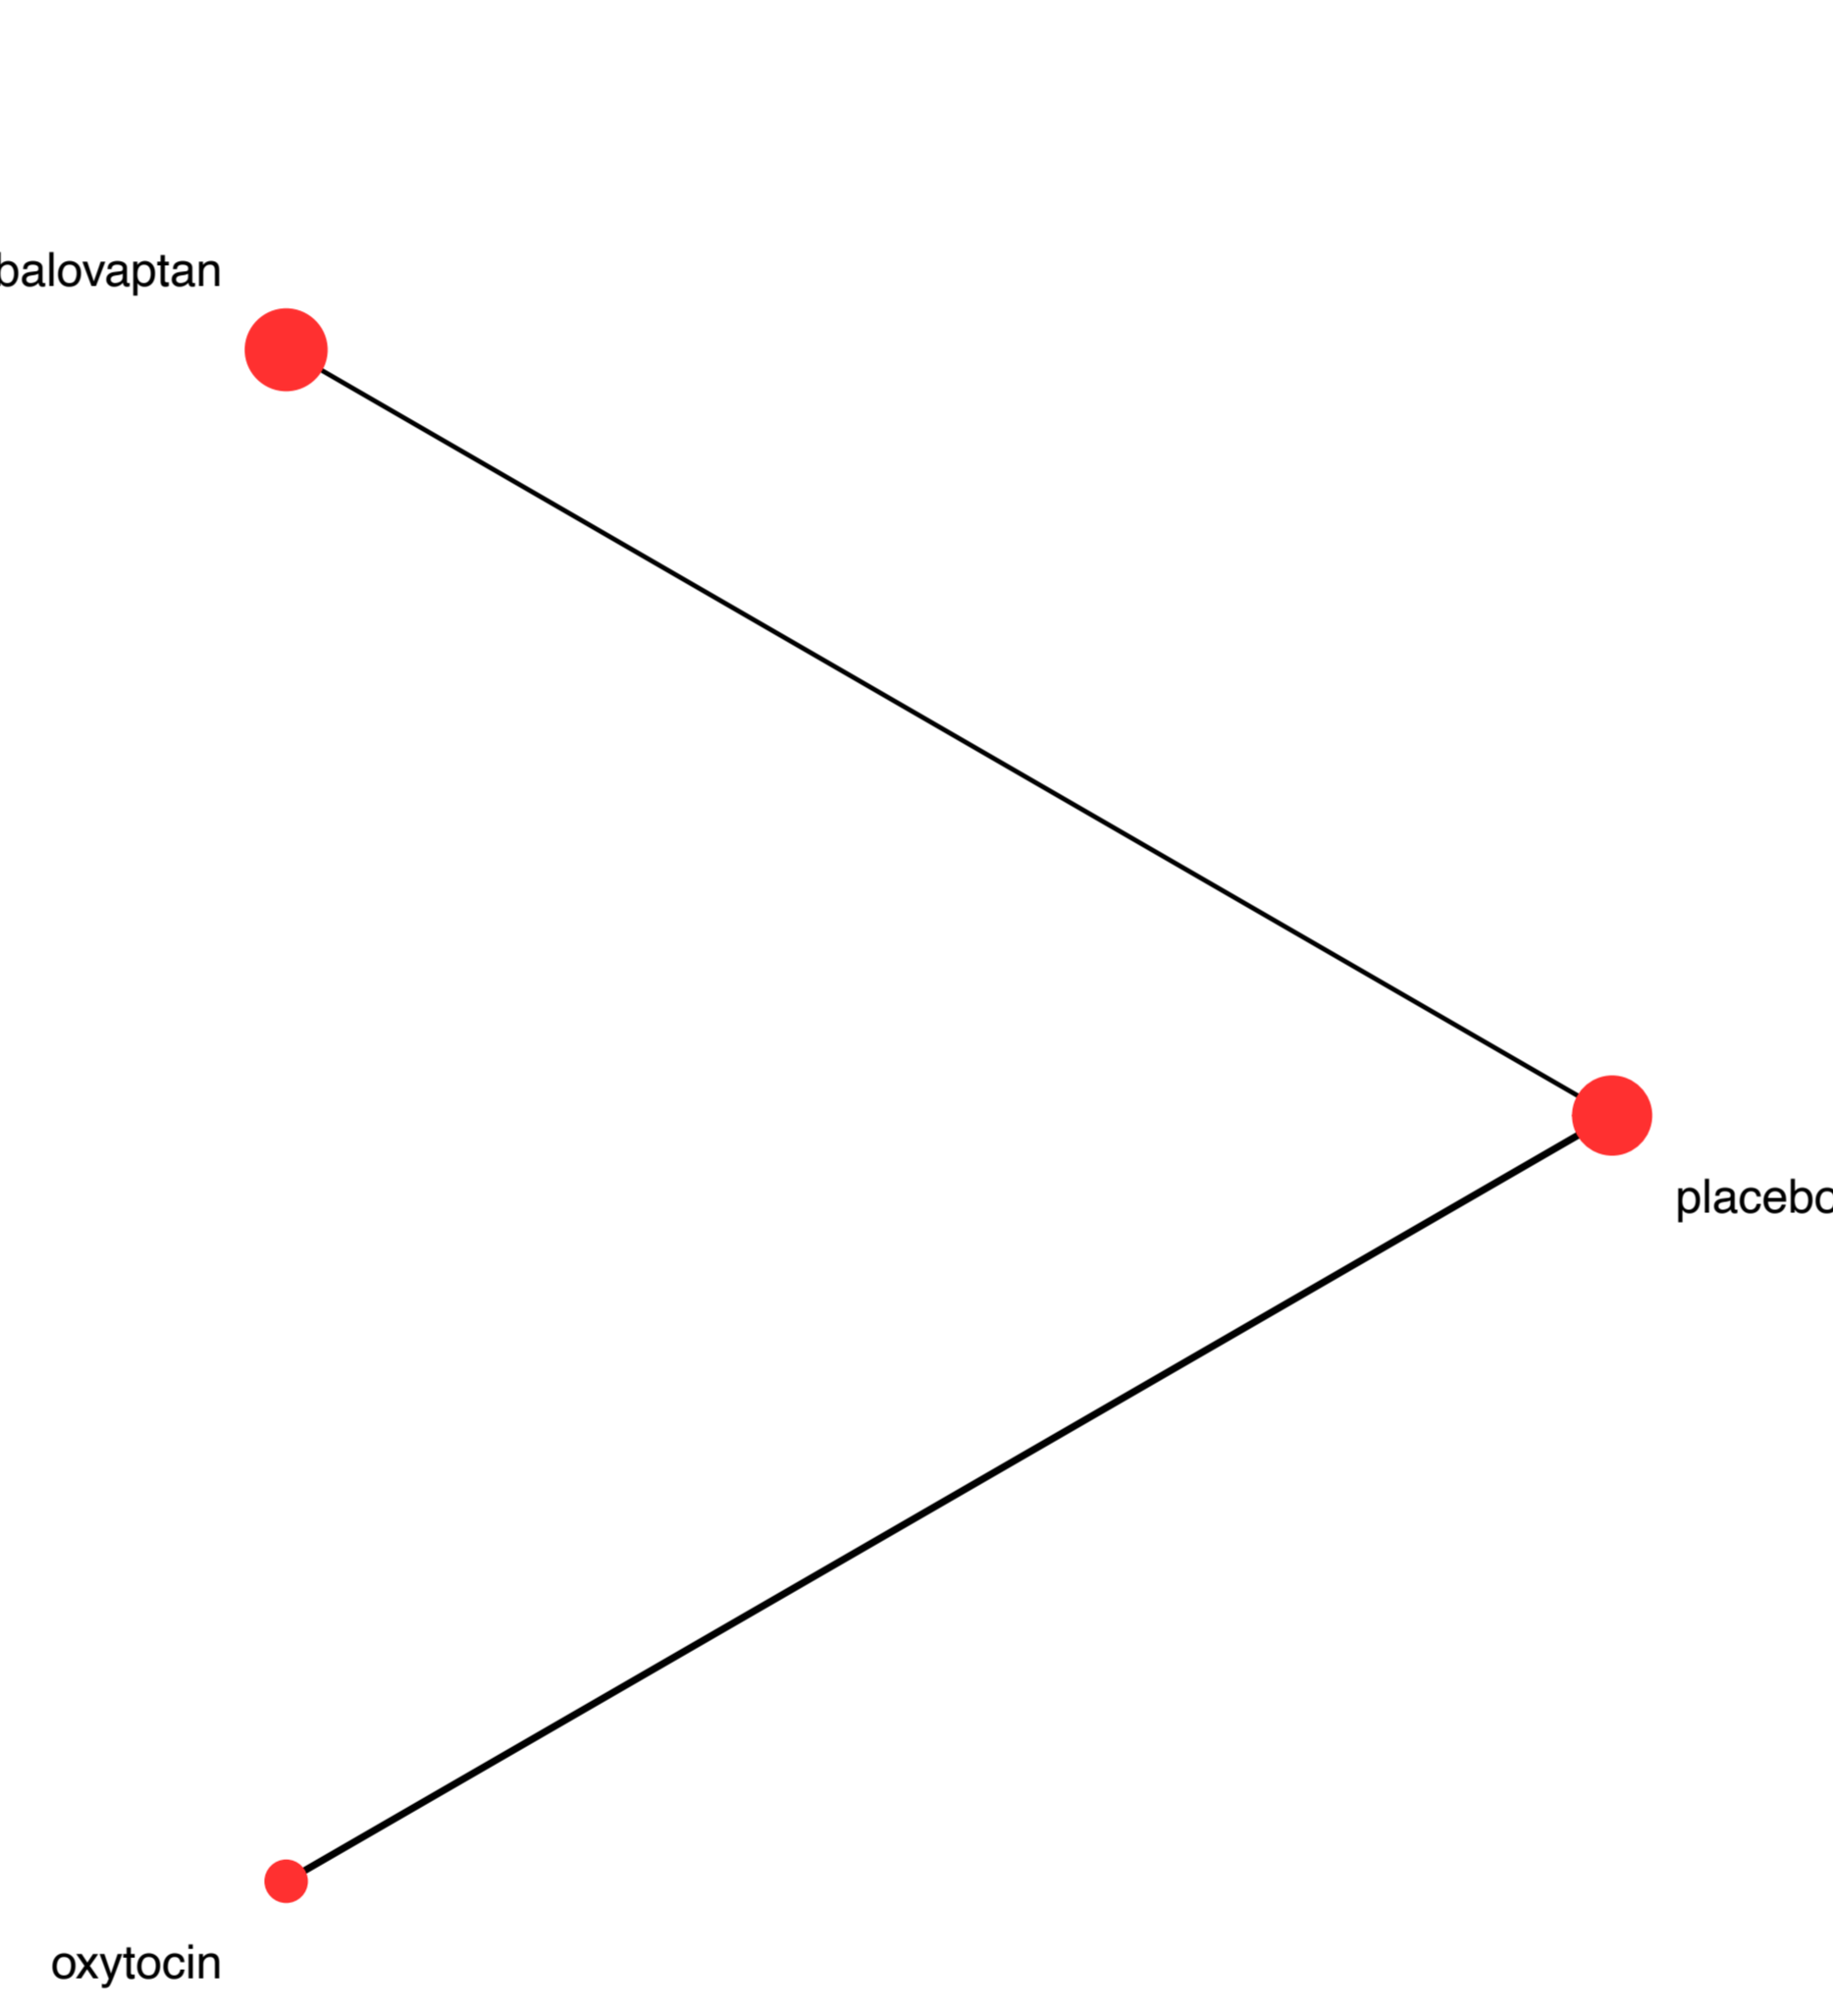

Global functioning

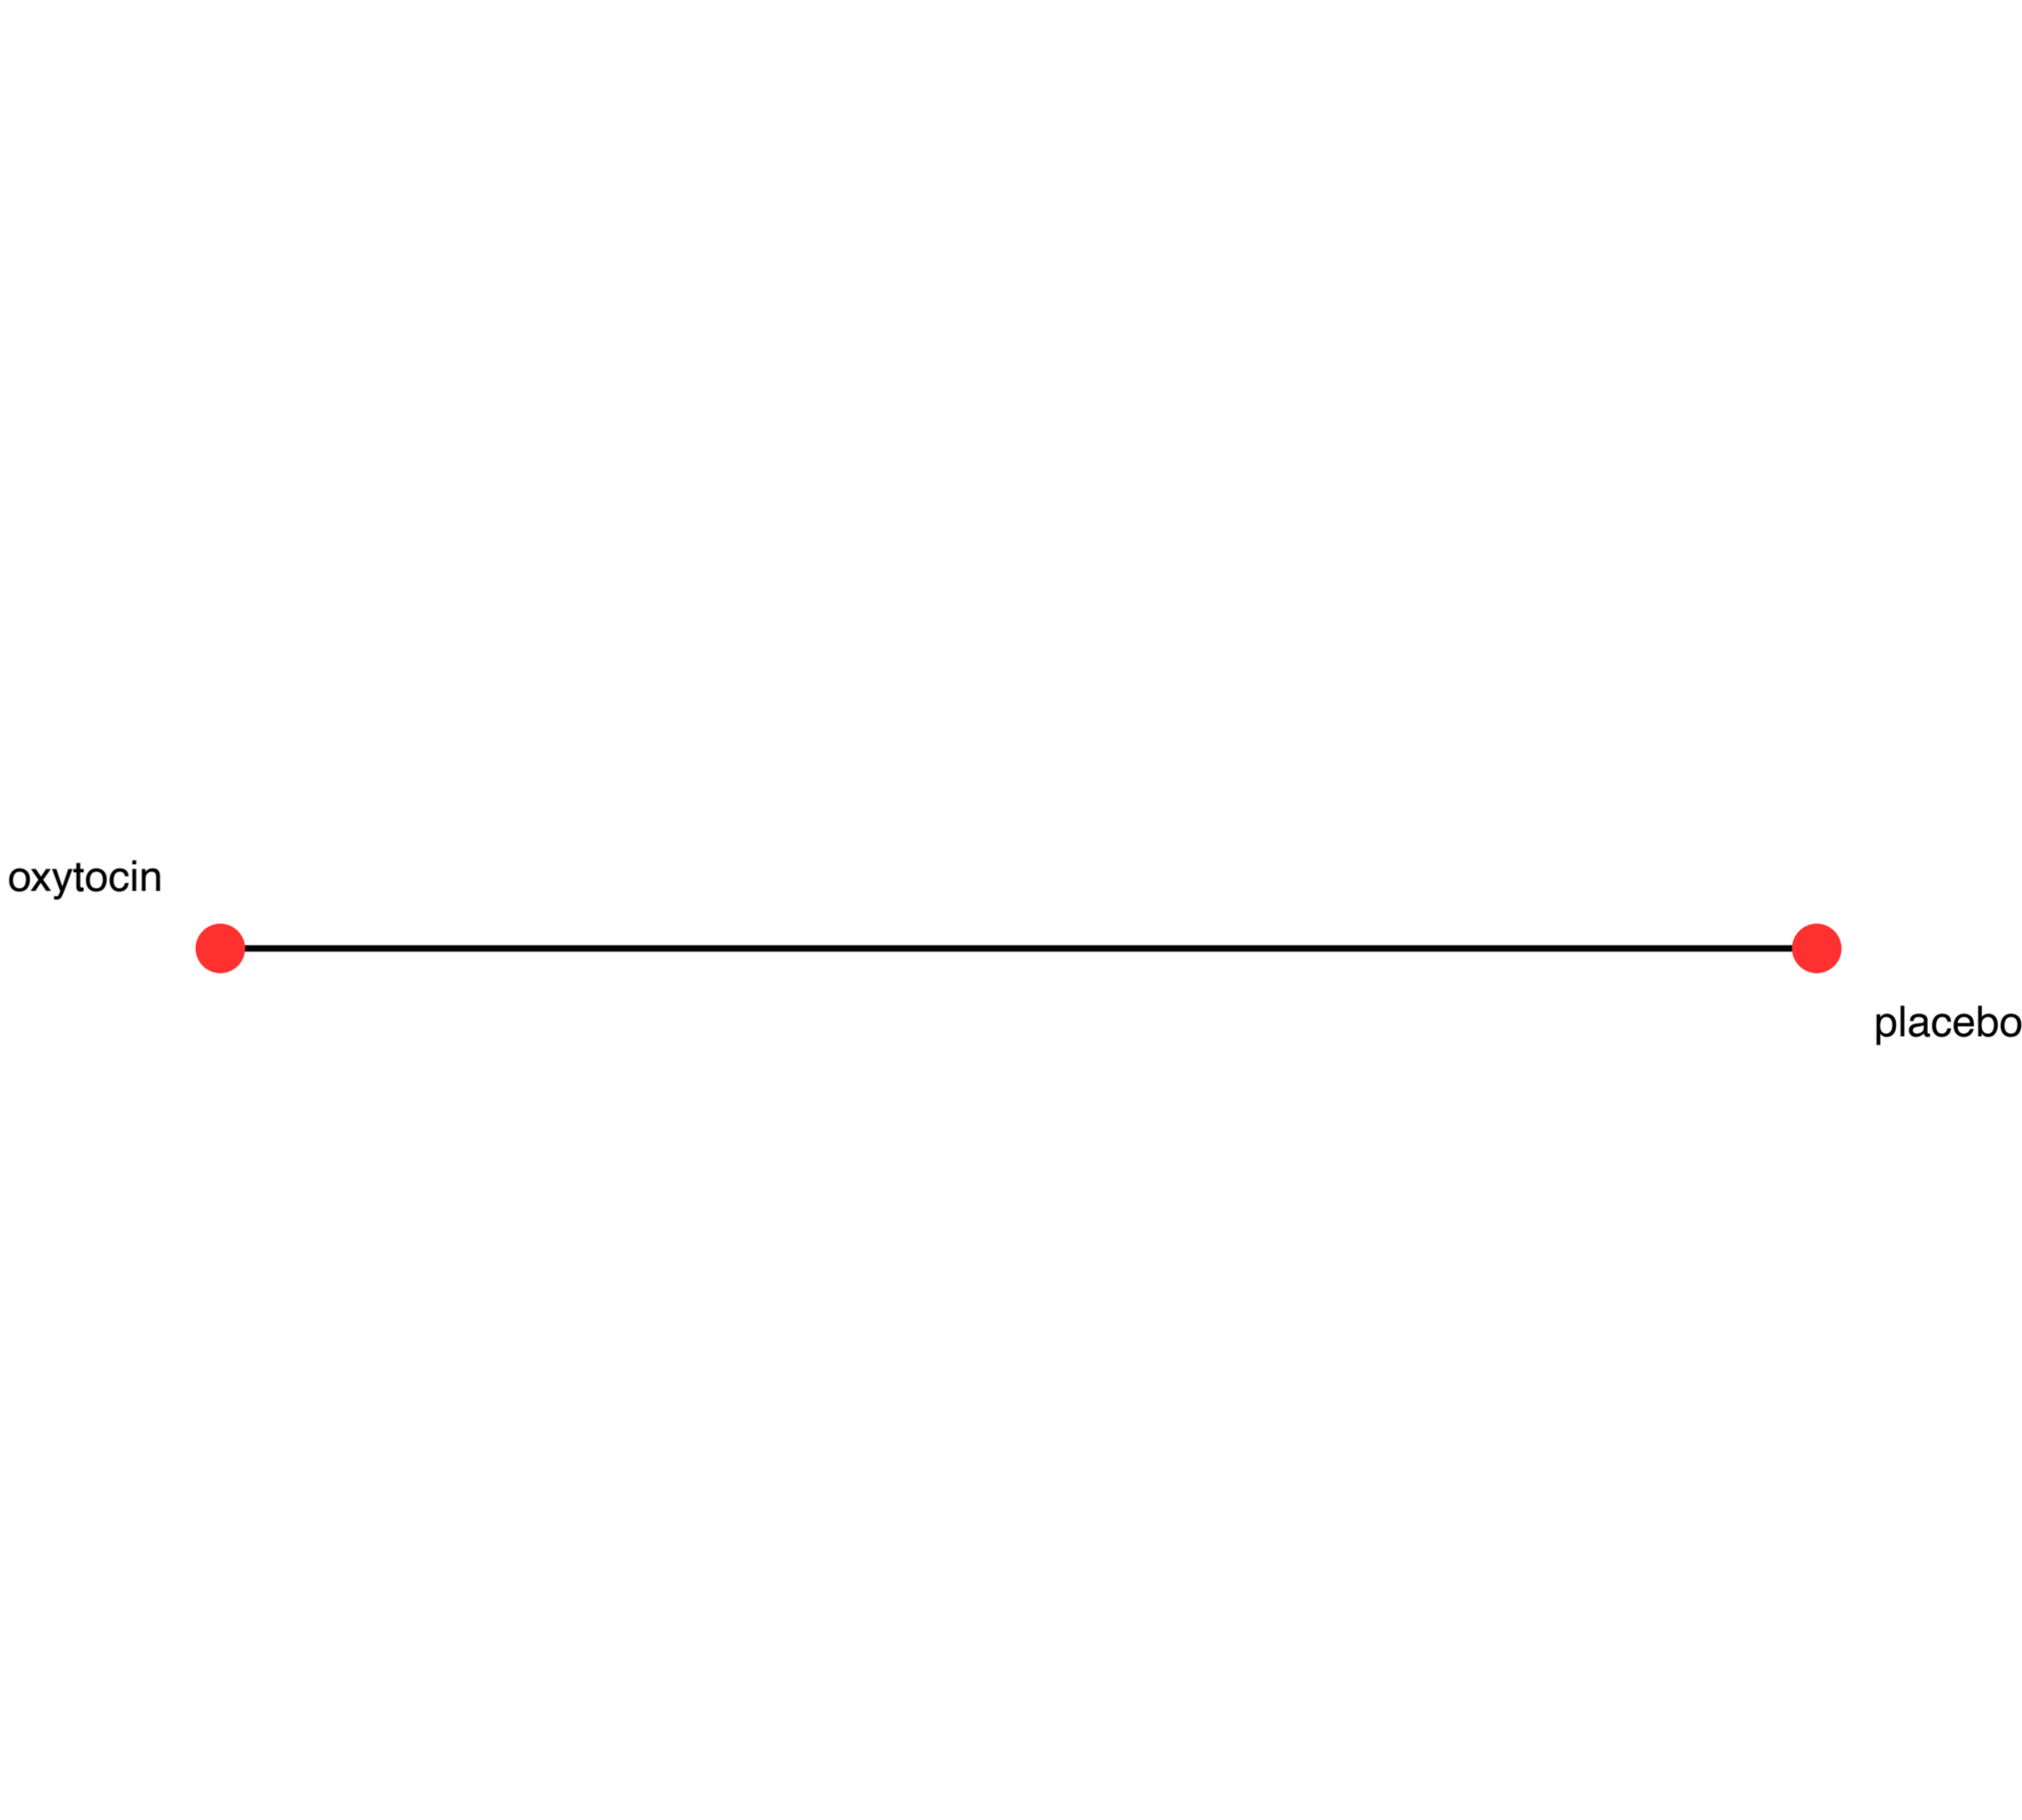

Response to treatment

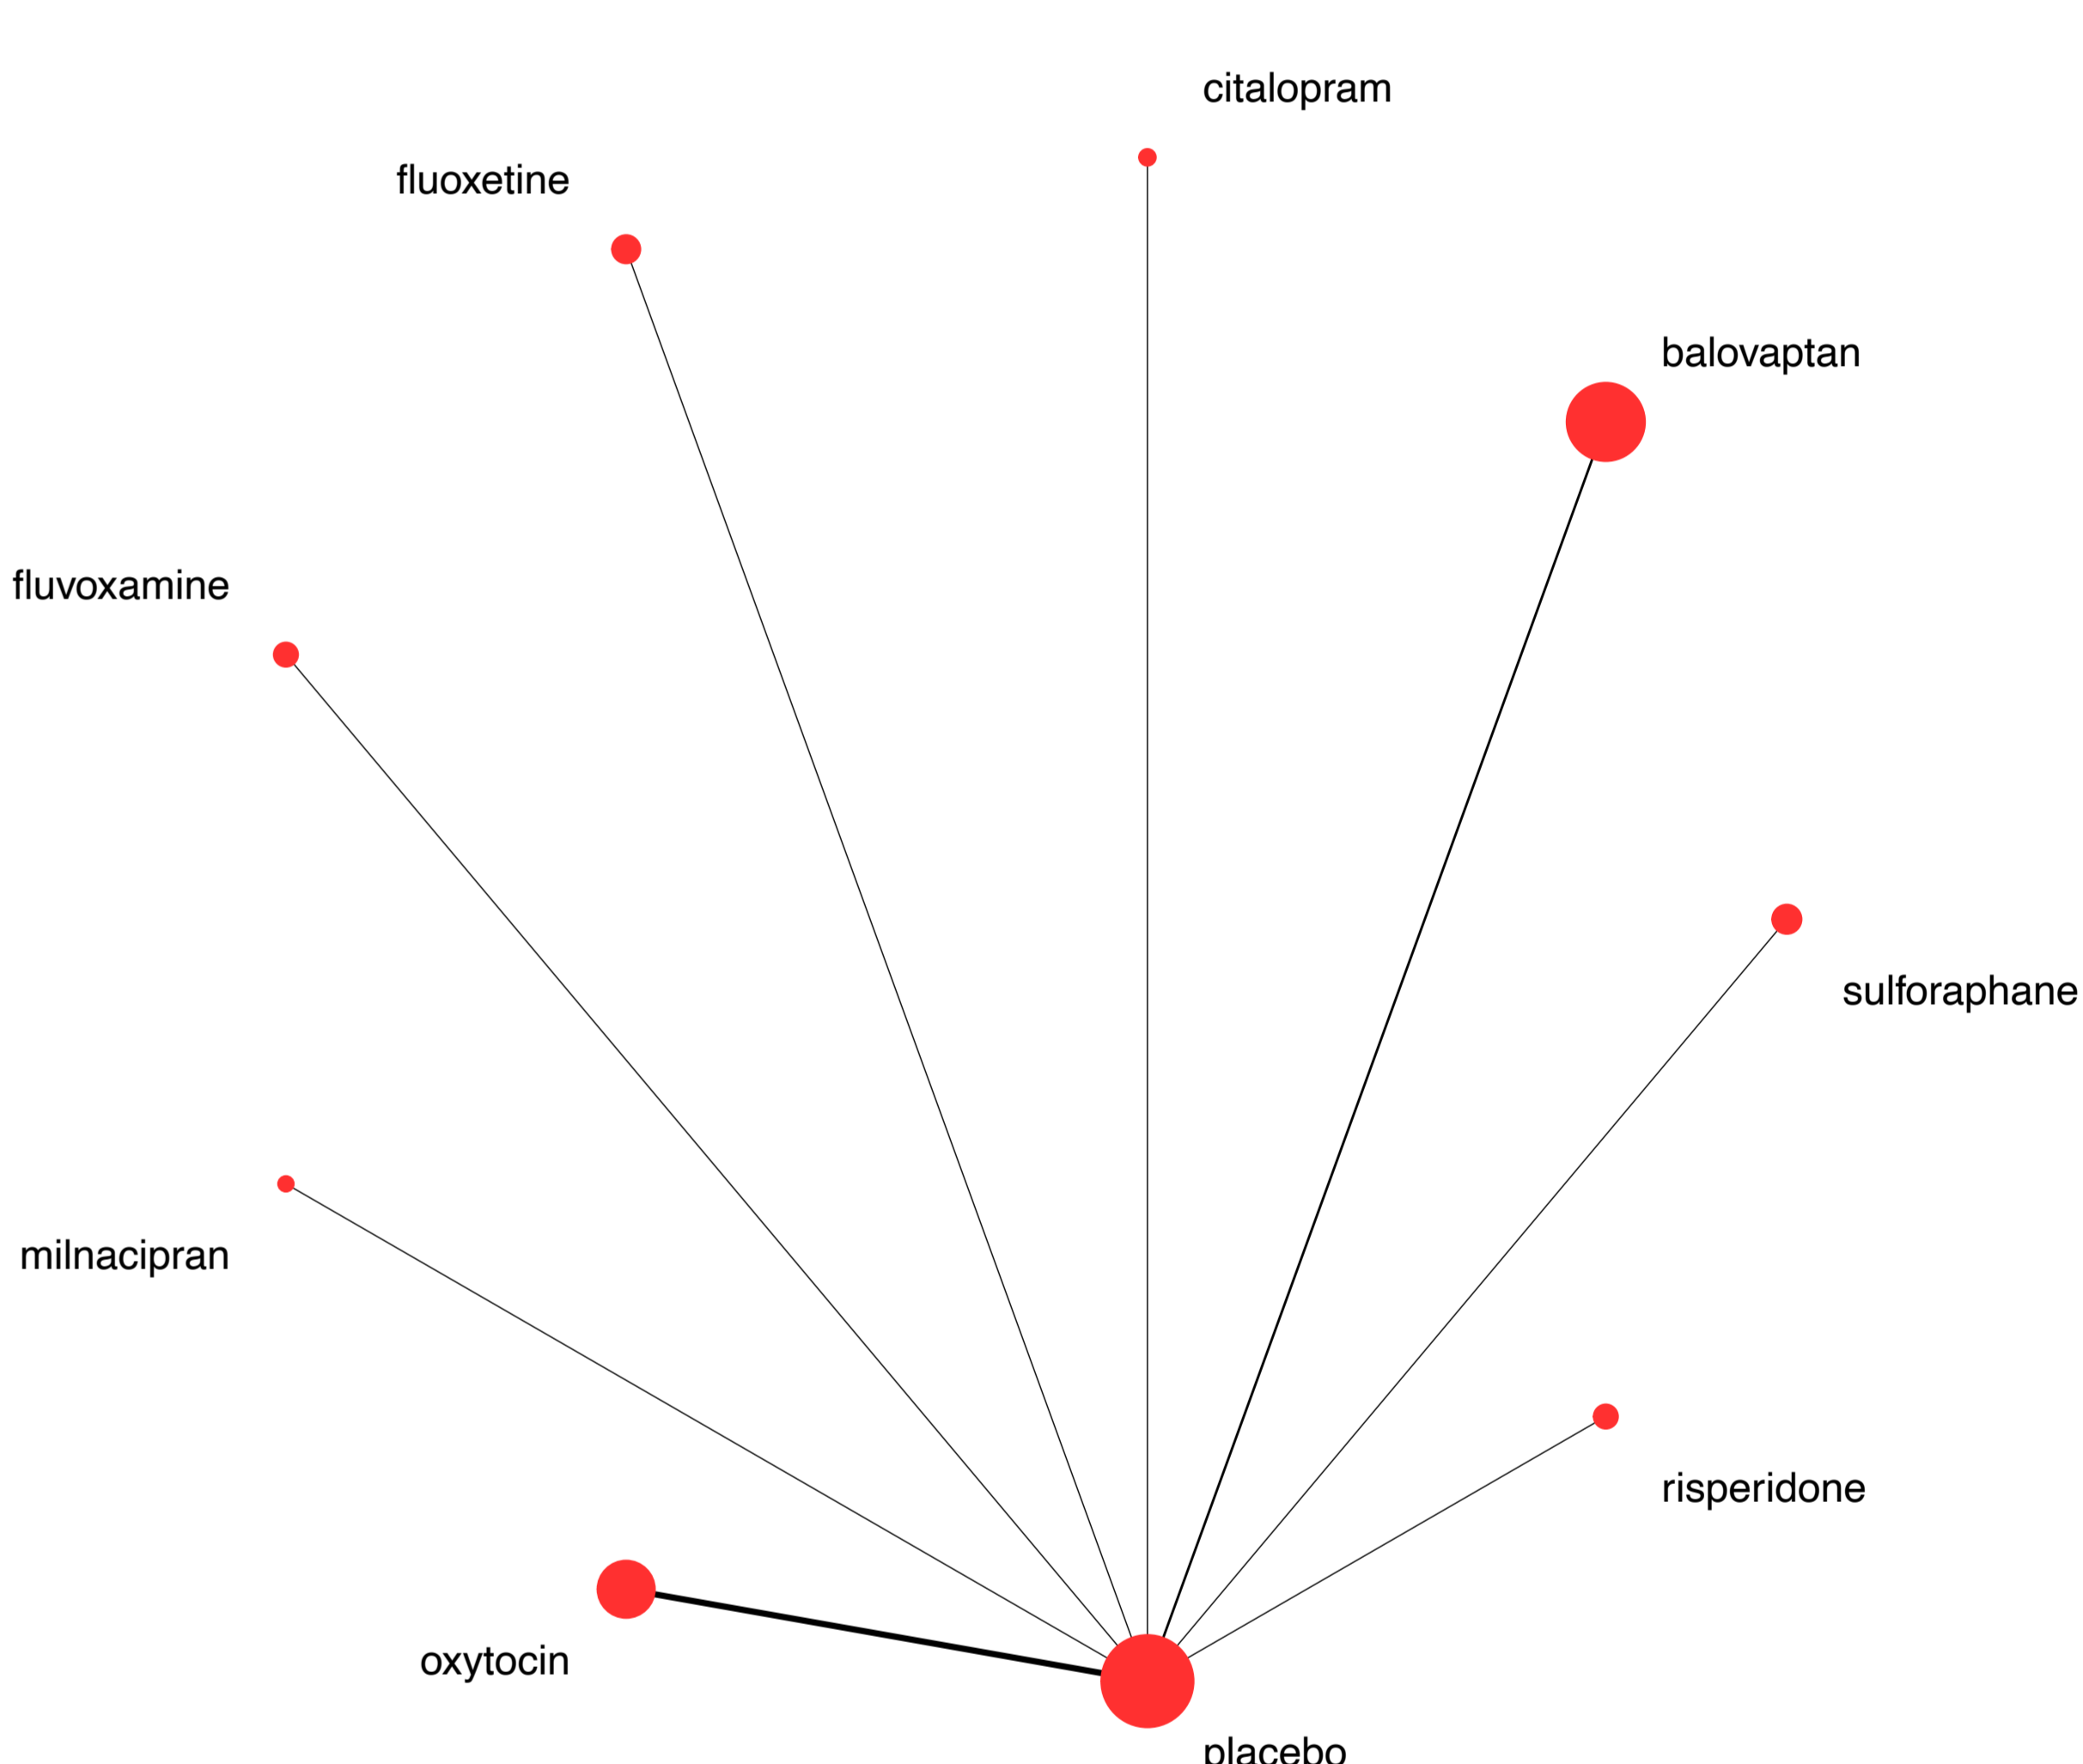

Dropouts due to any reason

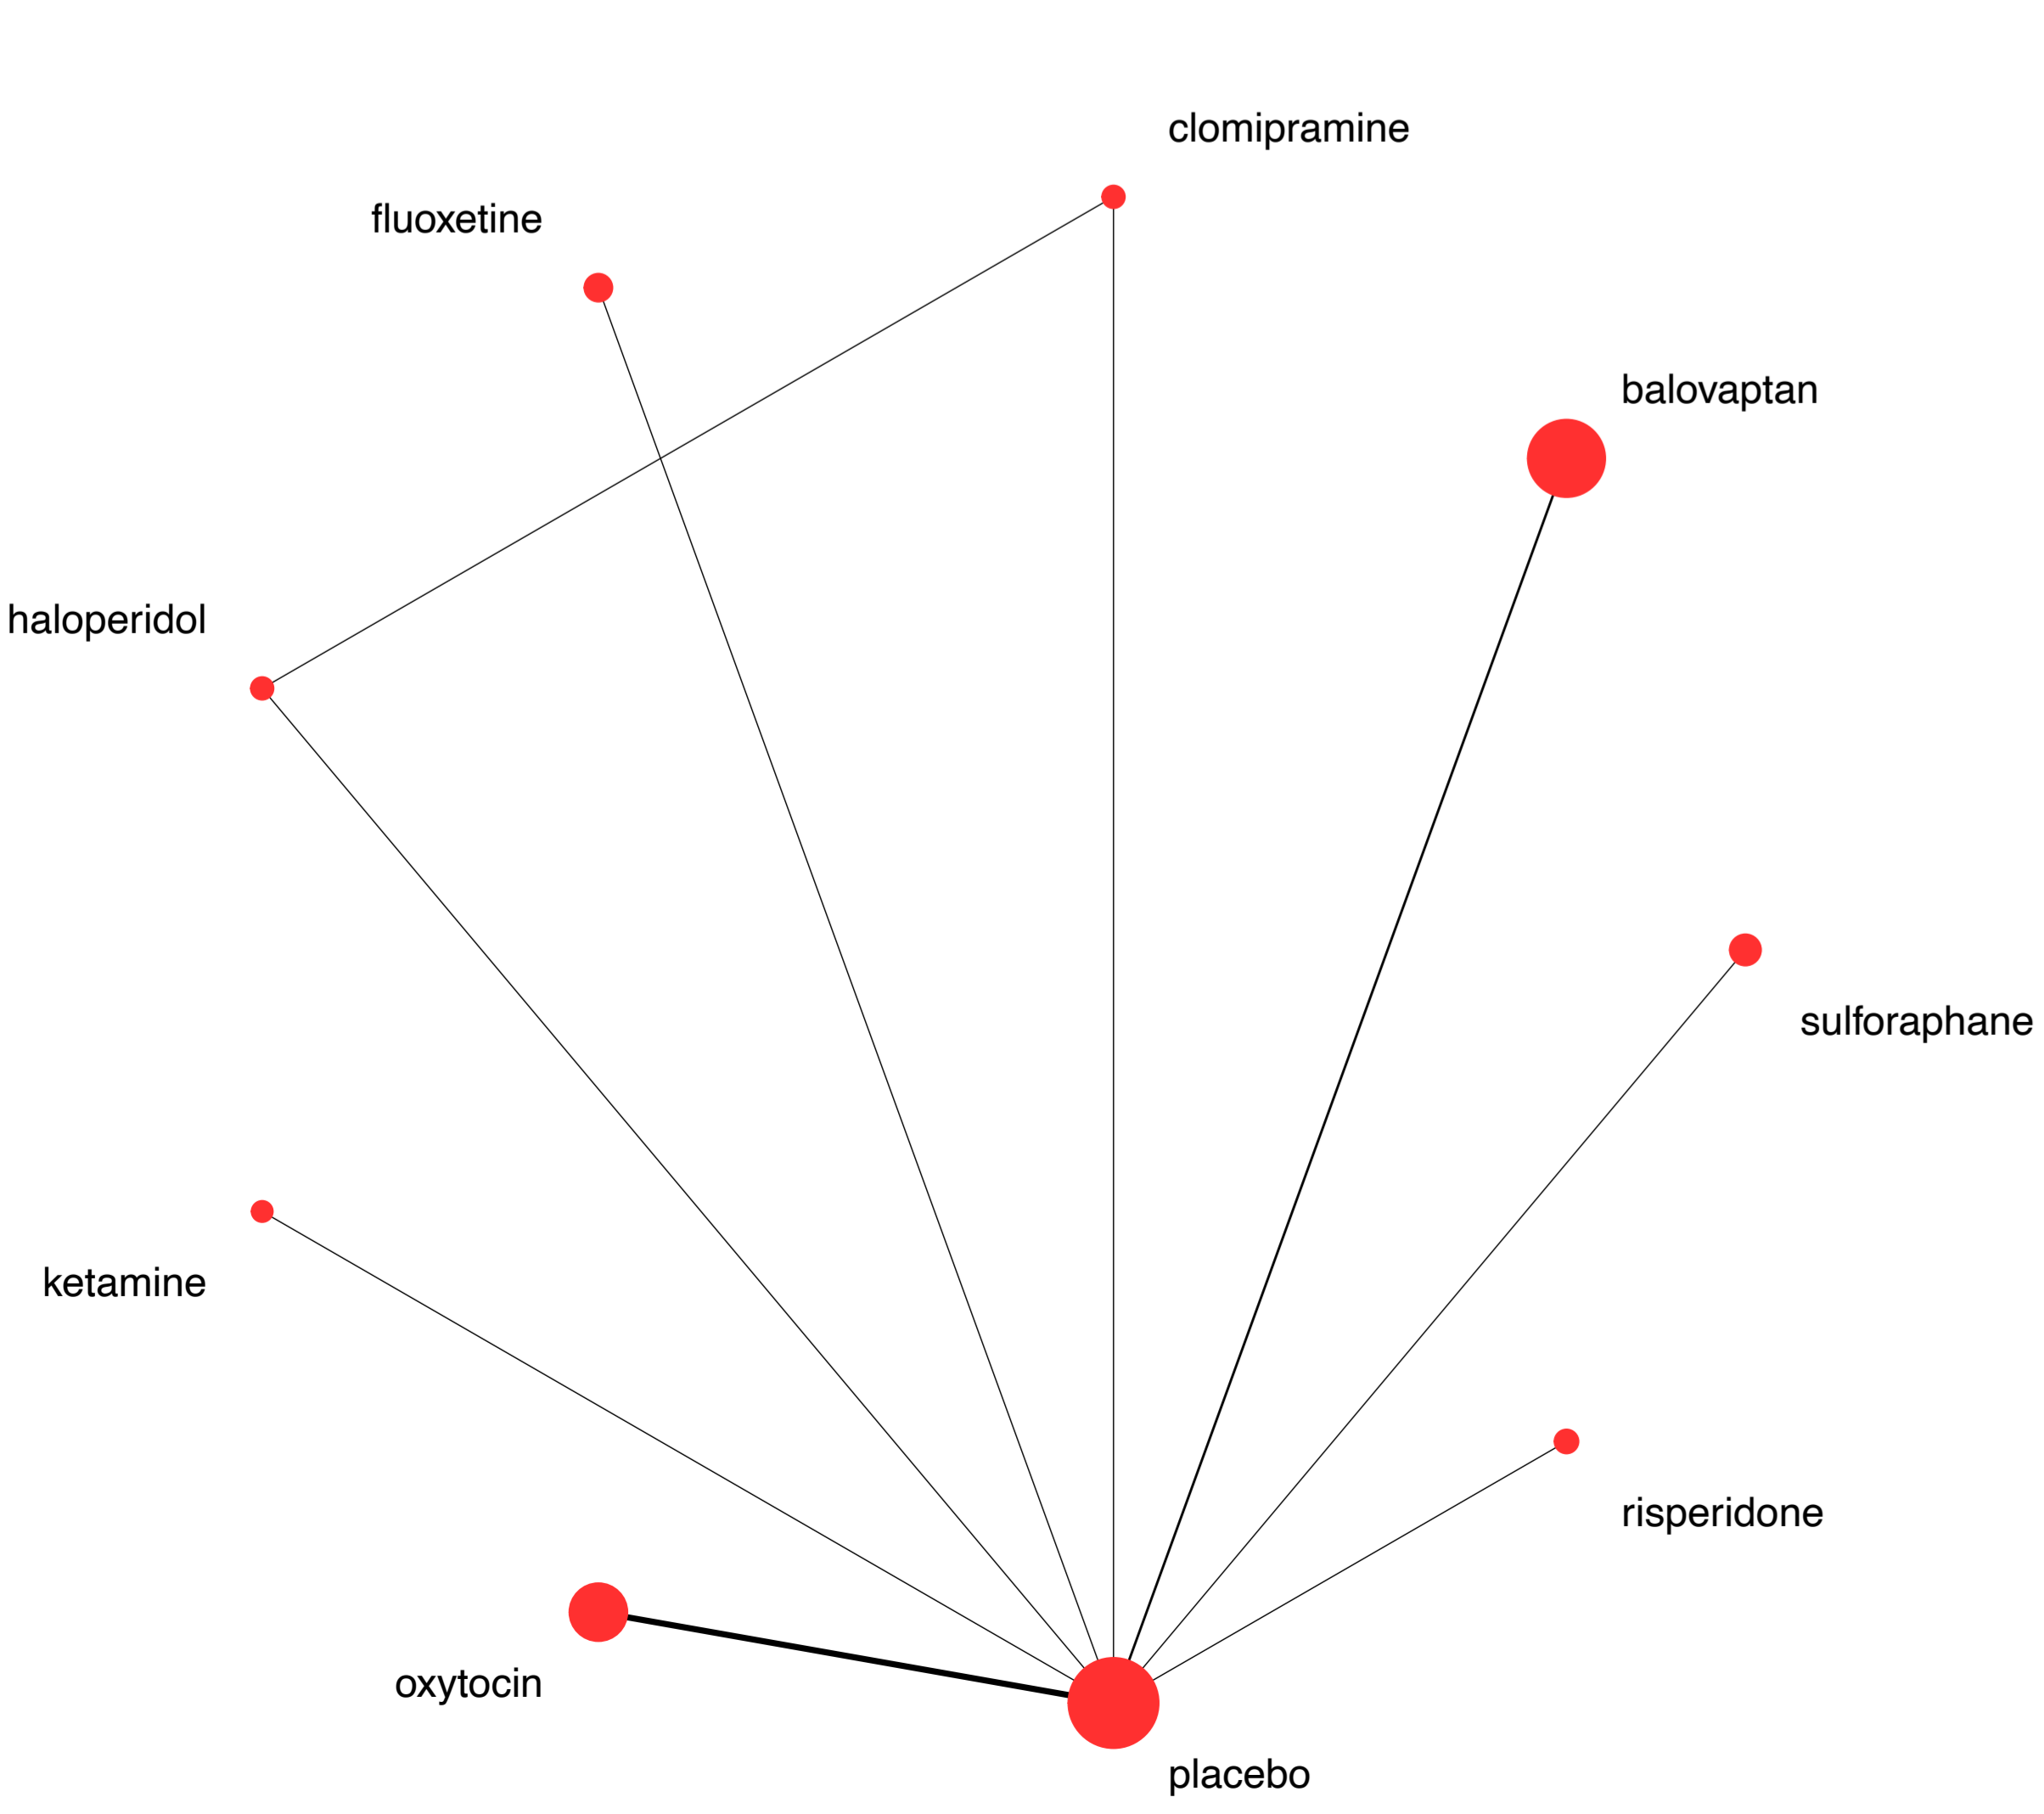

Dropouts due to adverse events

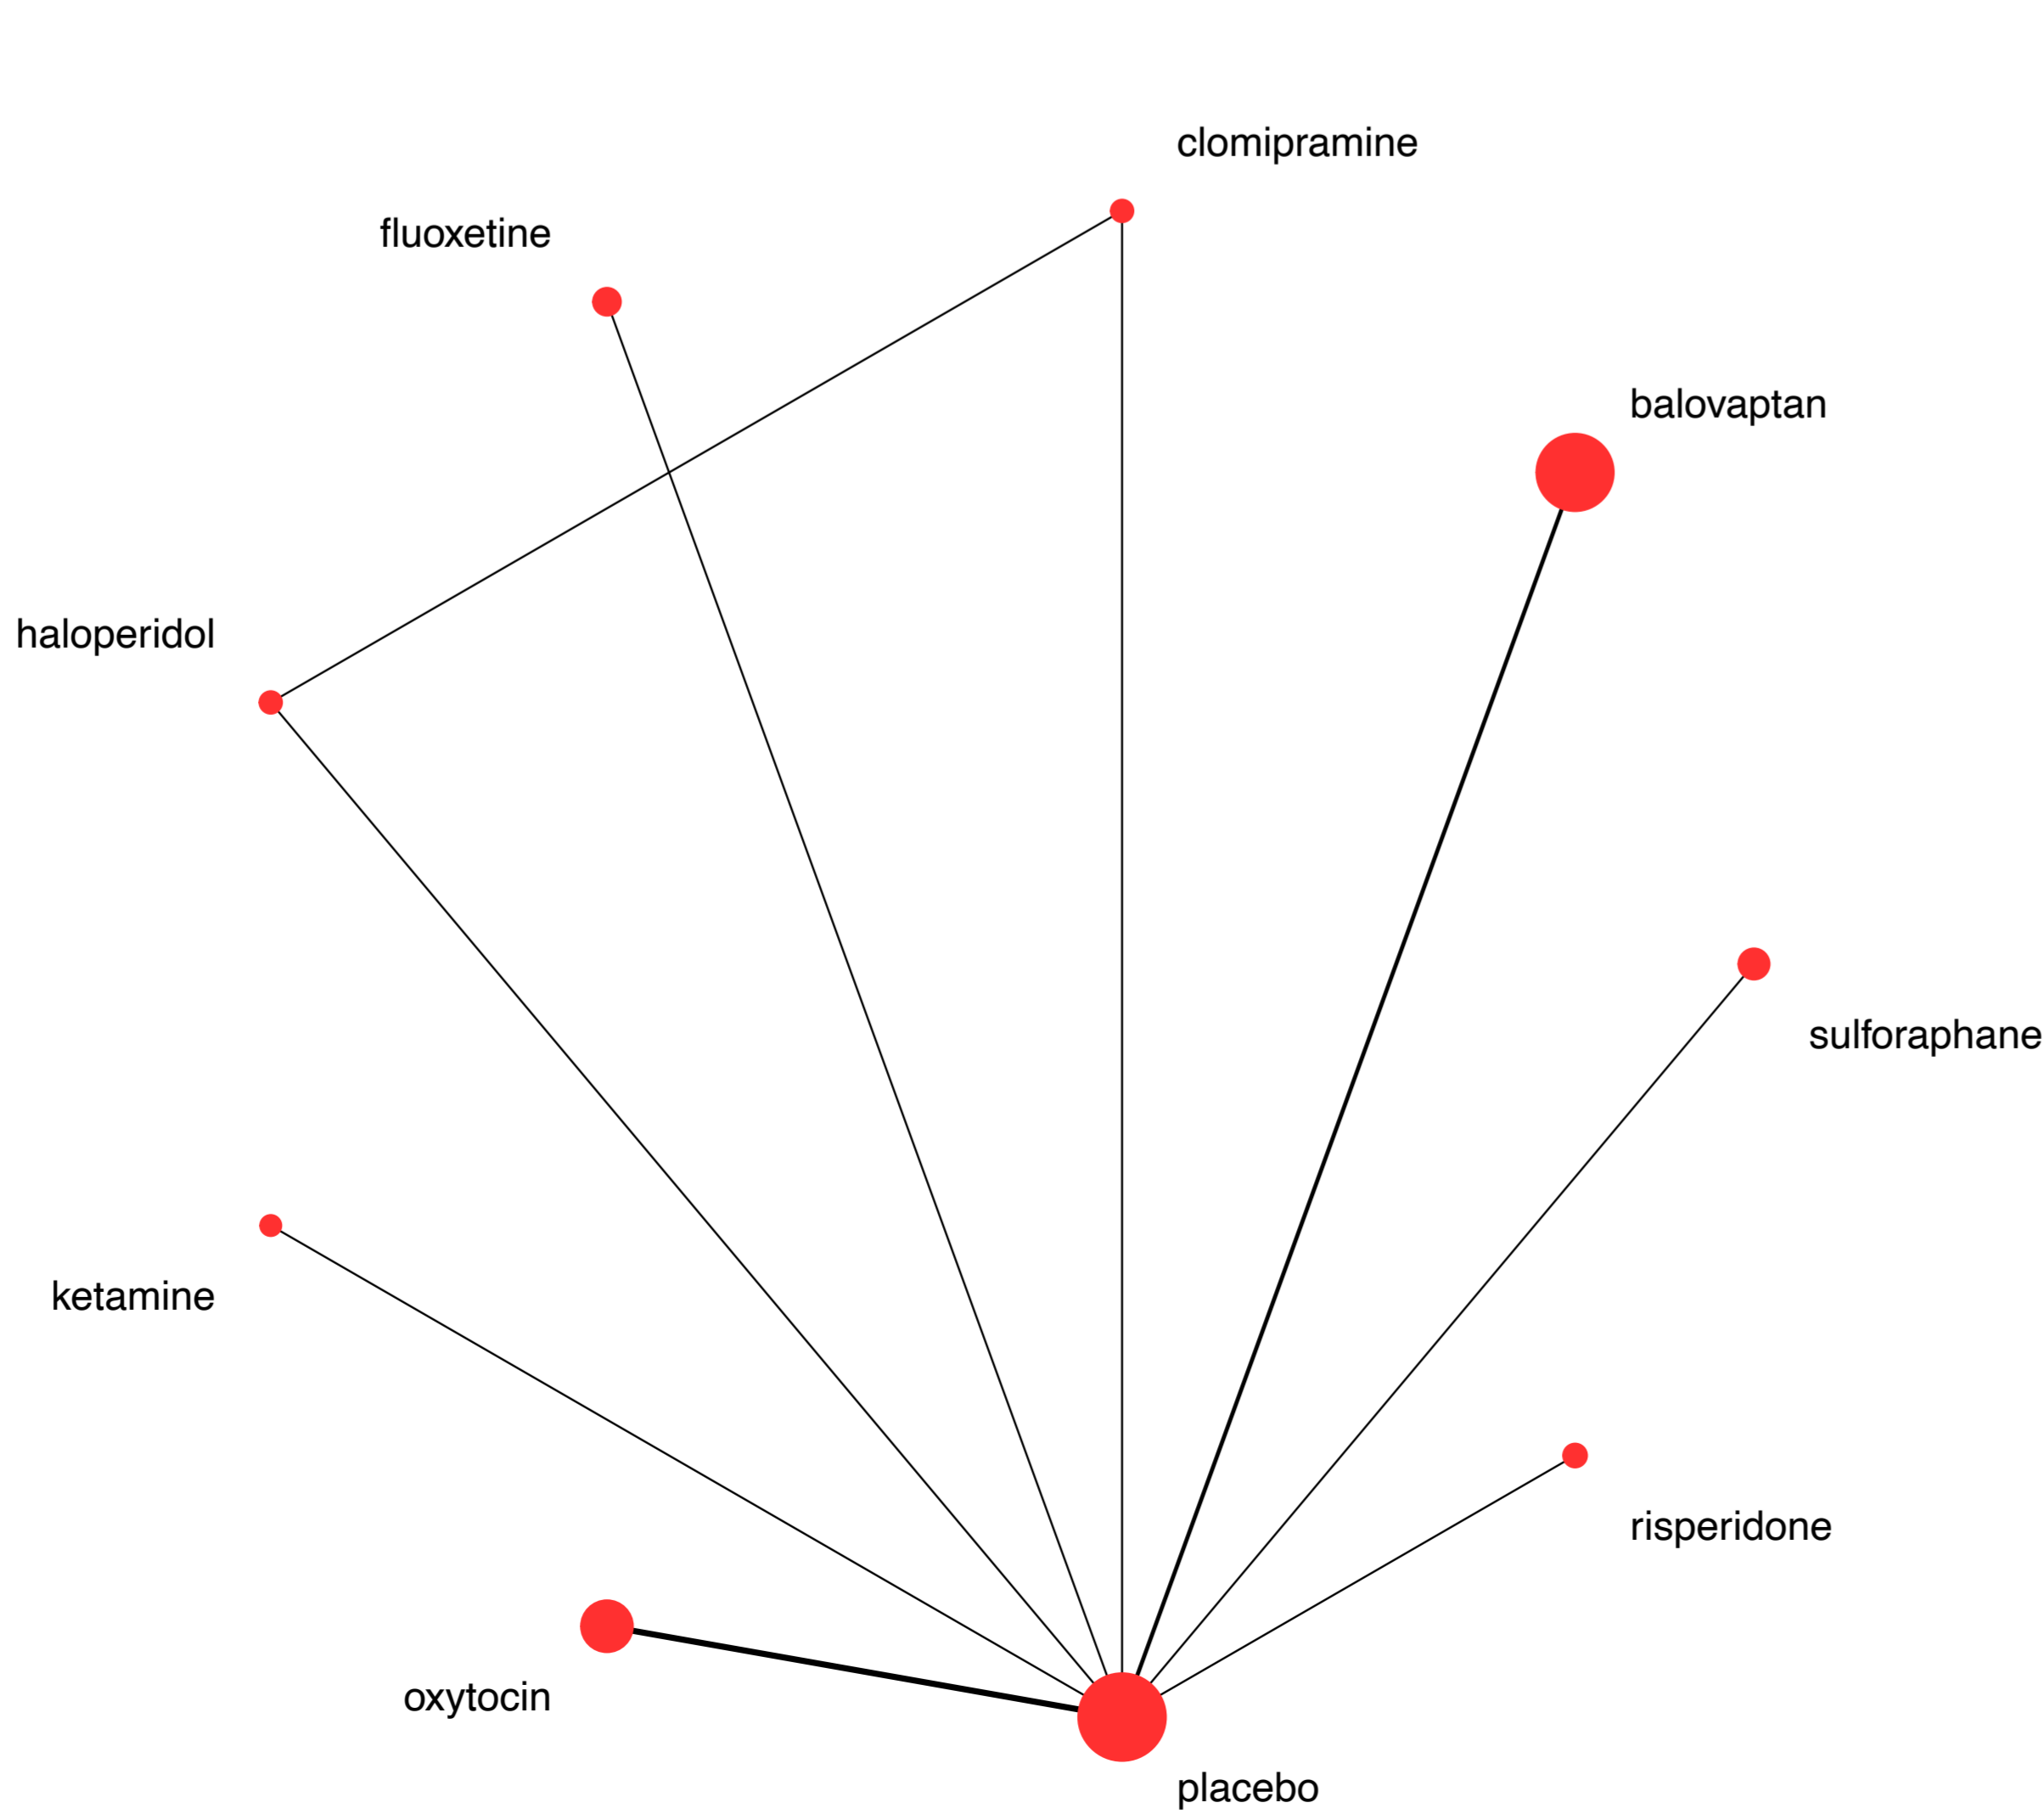

Any adverse event

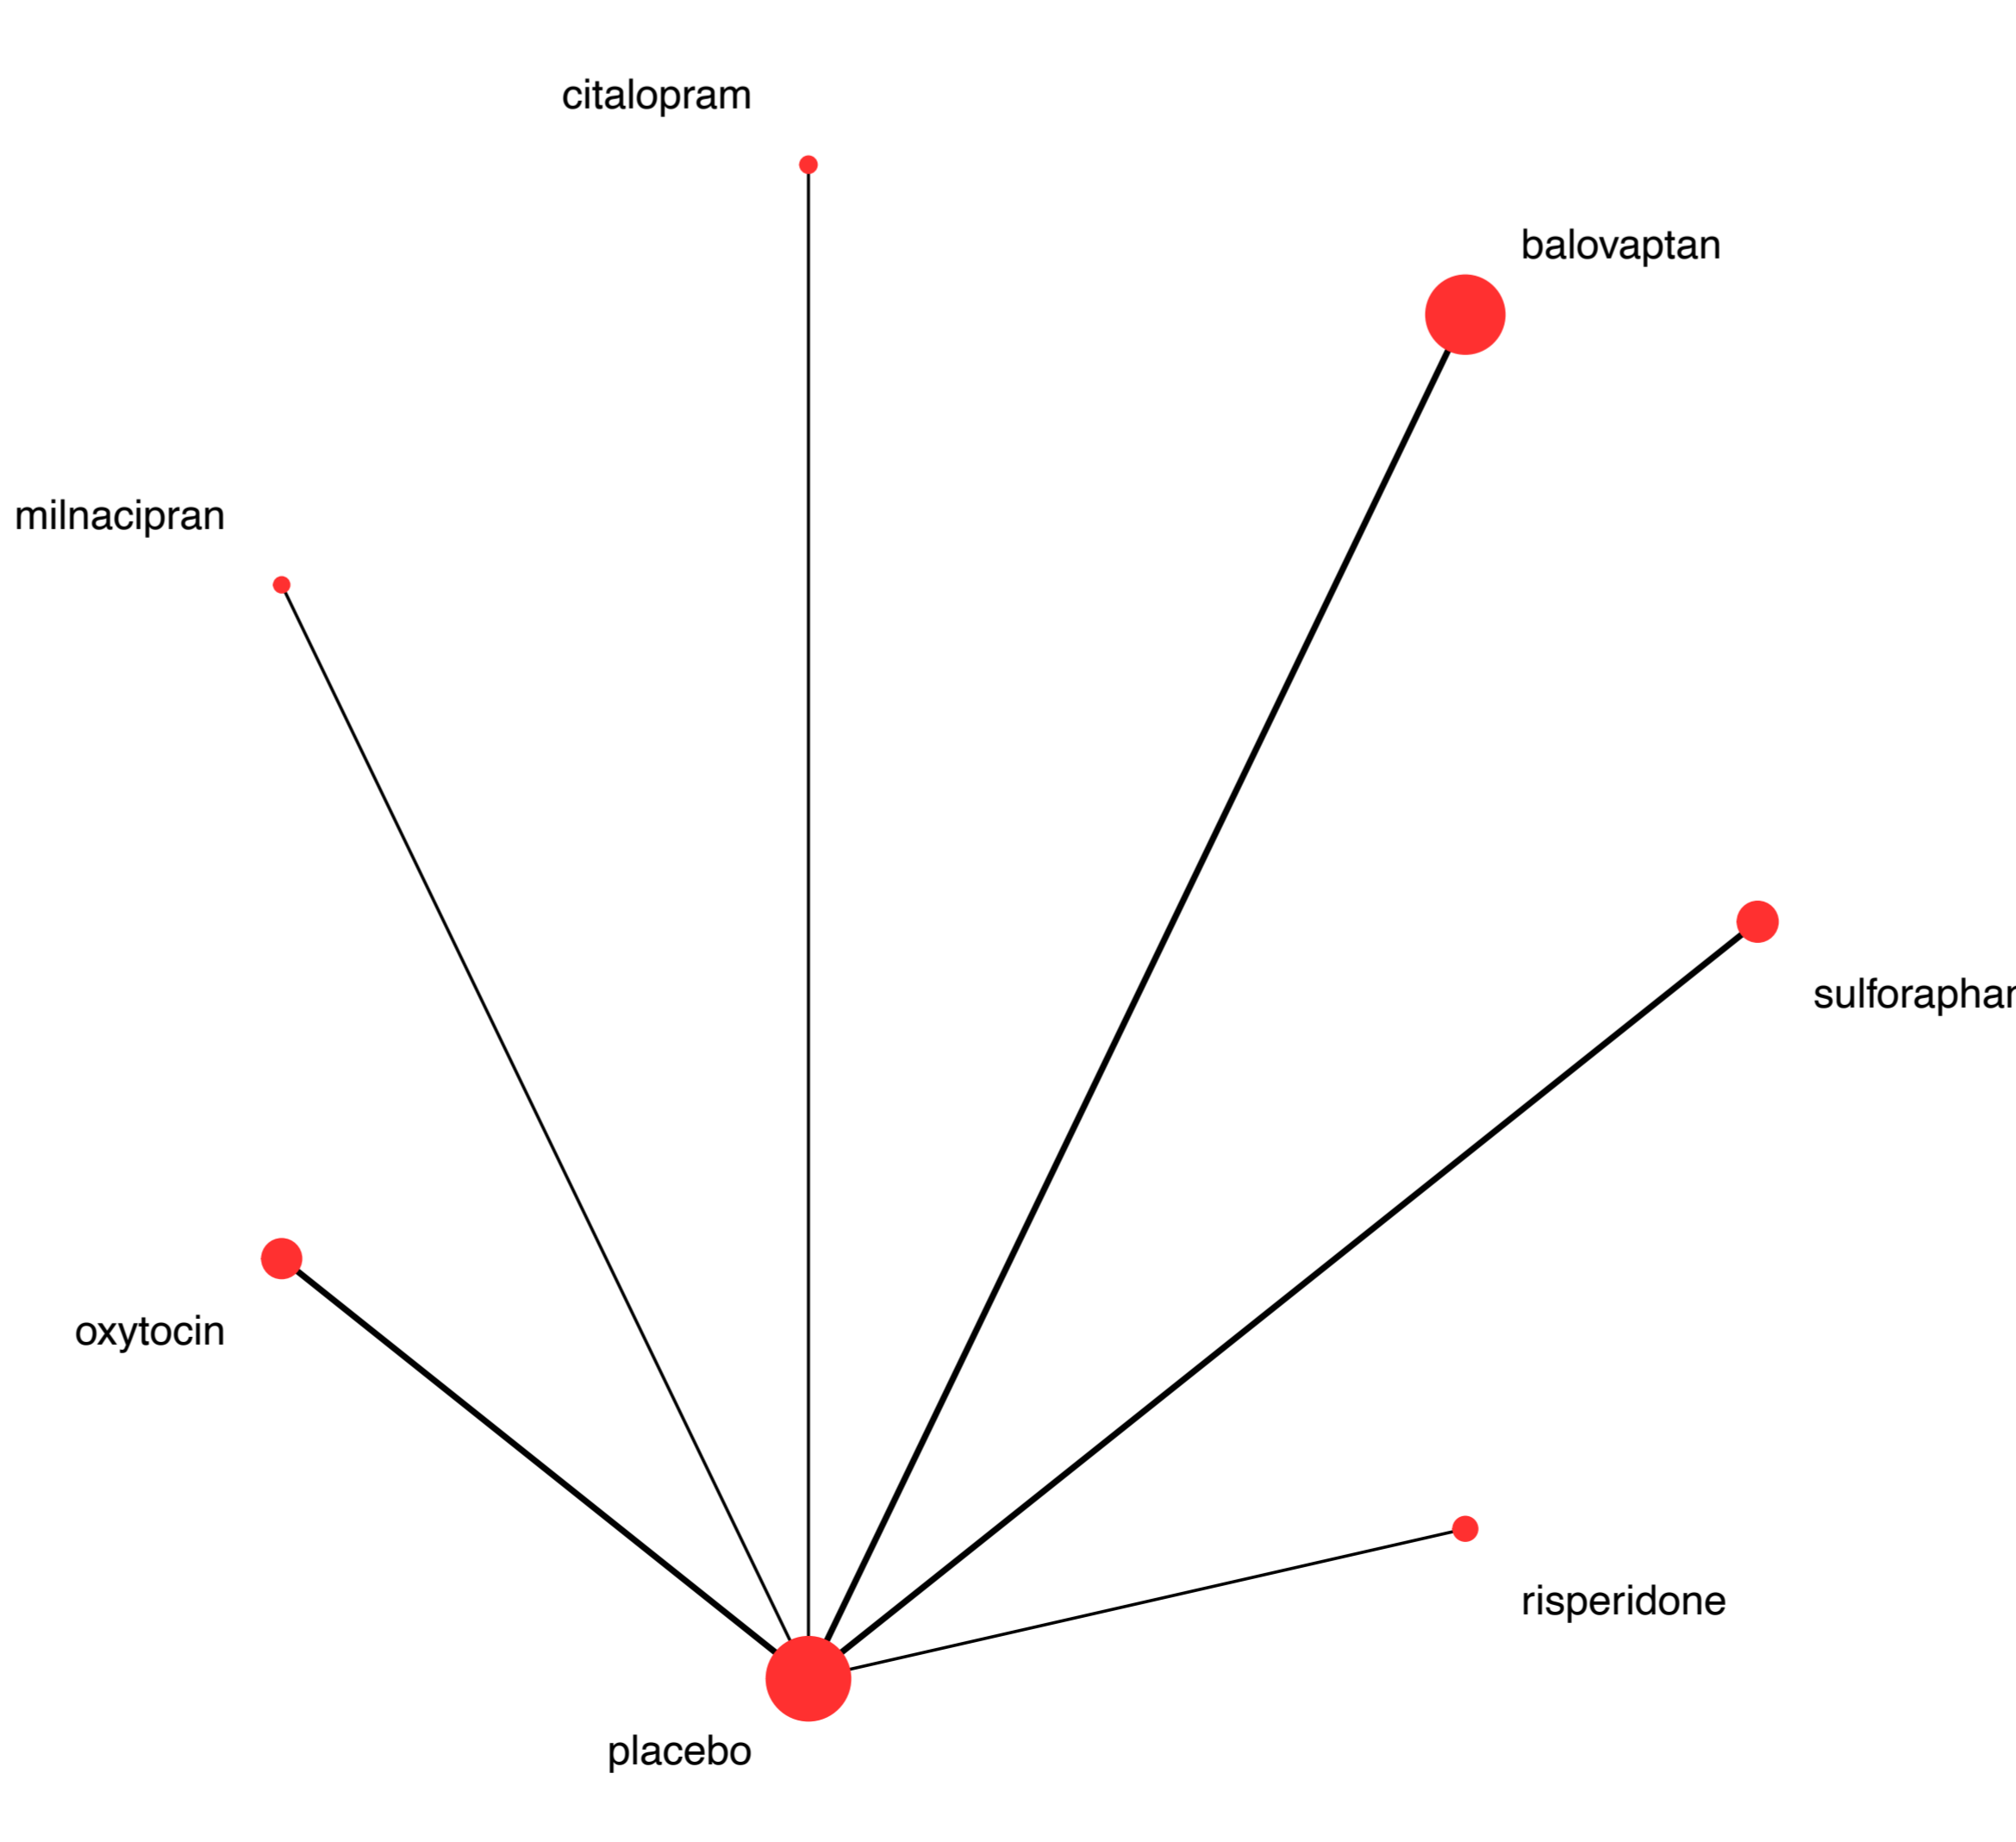

Sedation

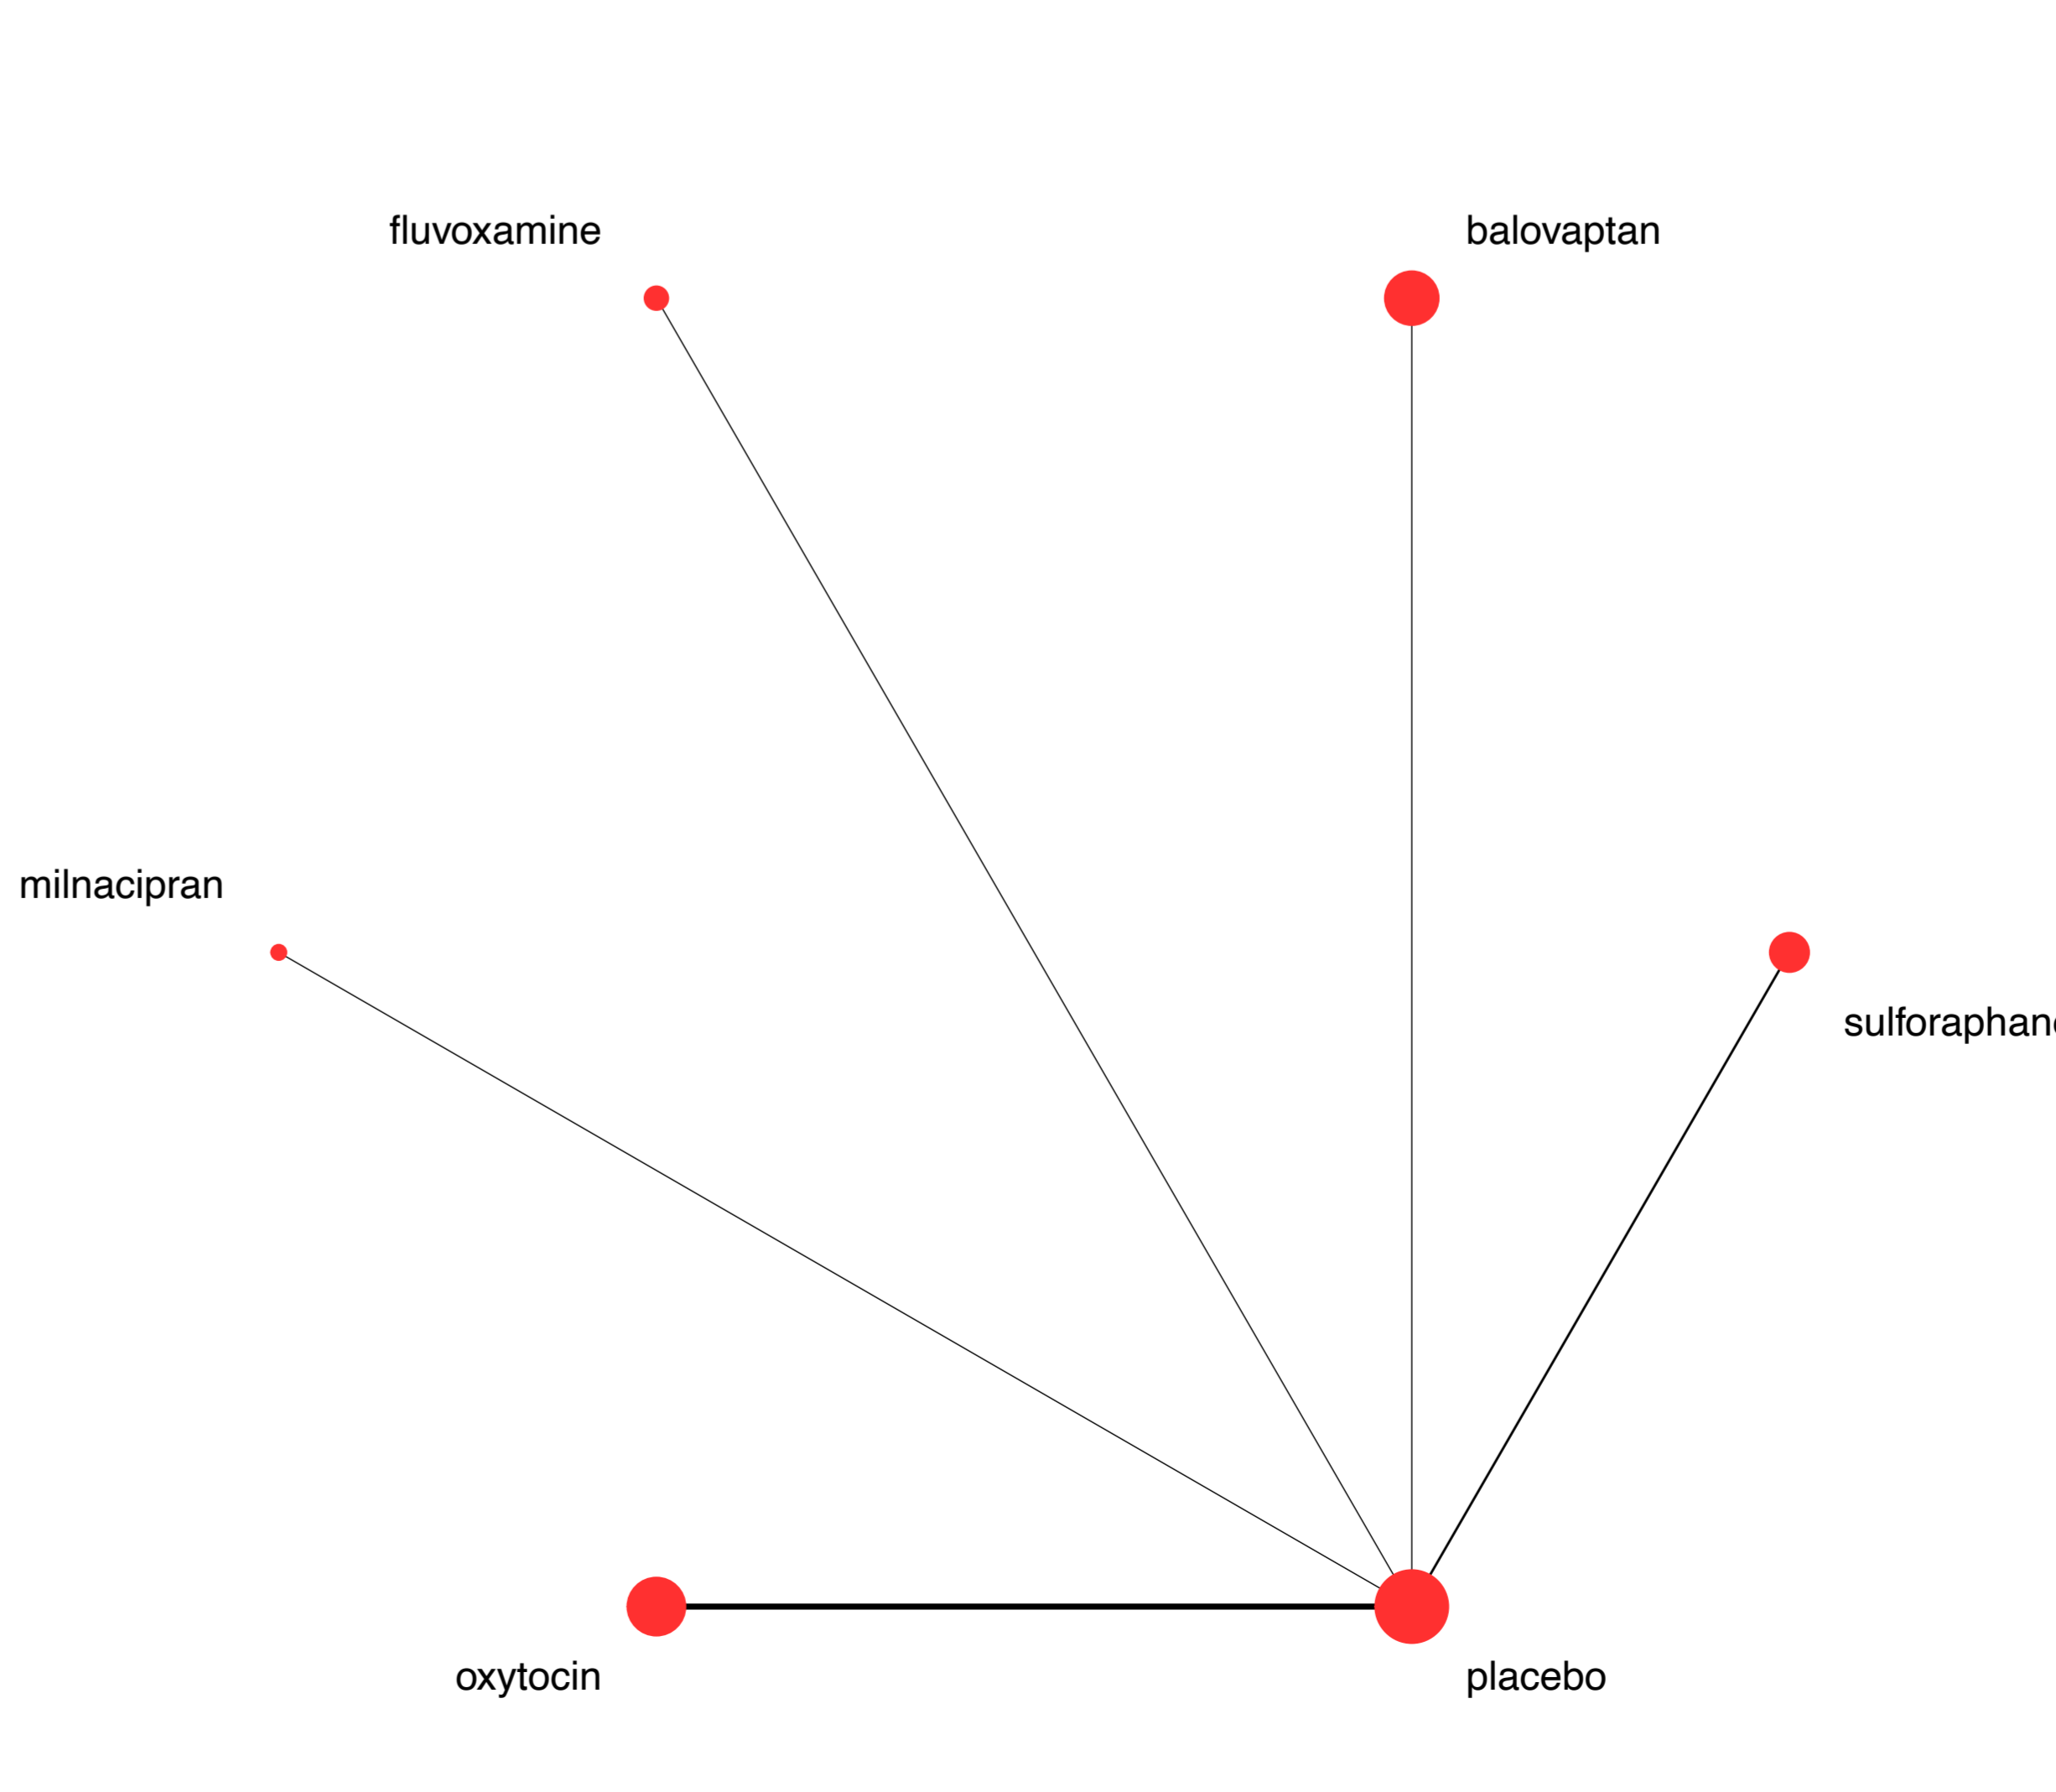

Weight gain

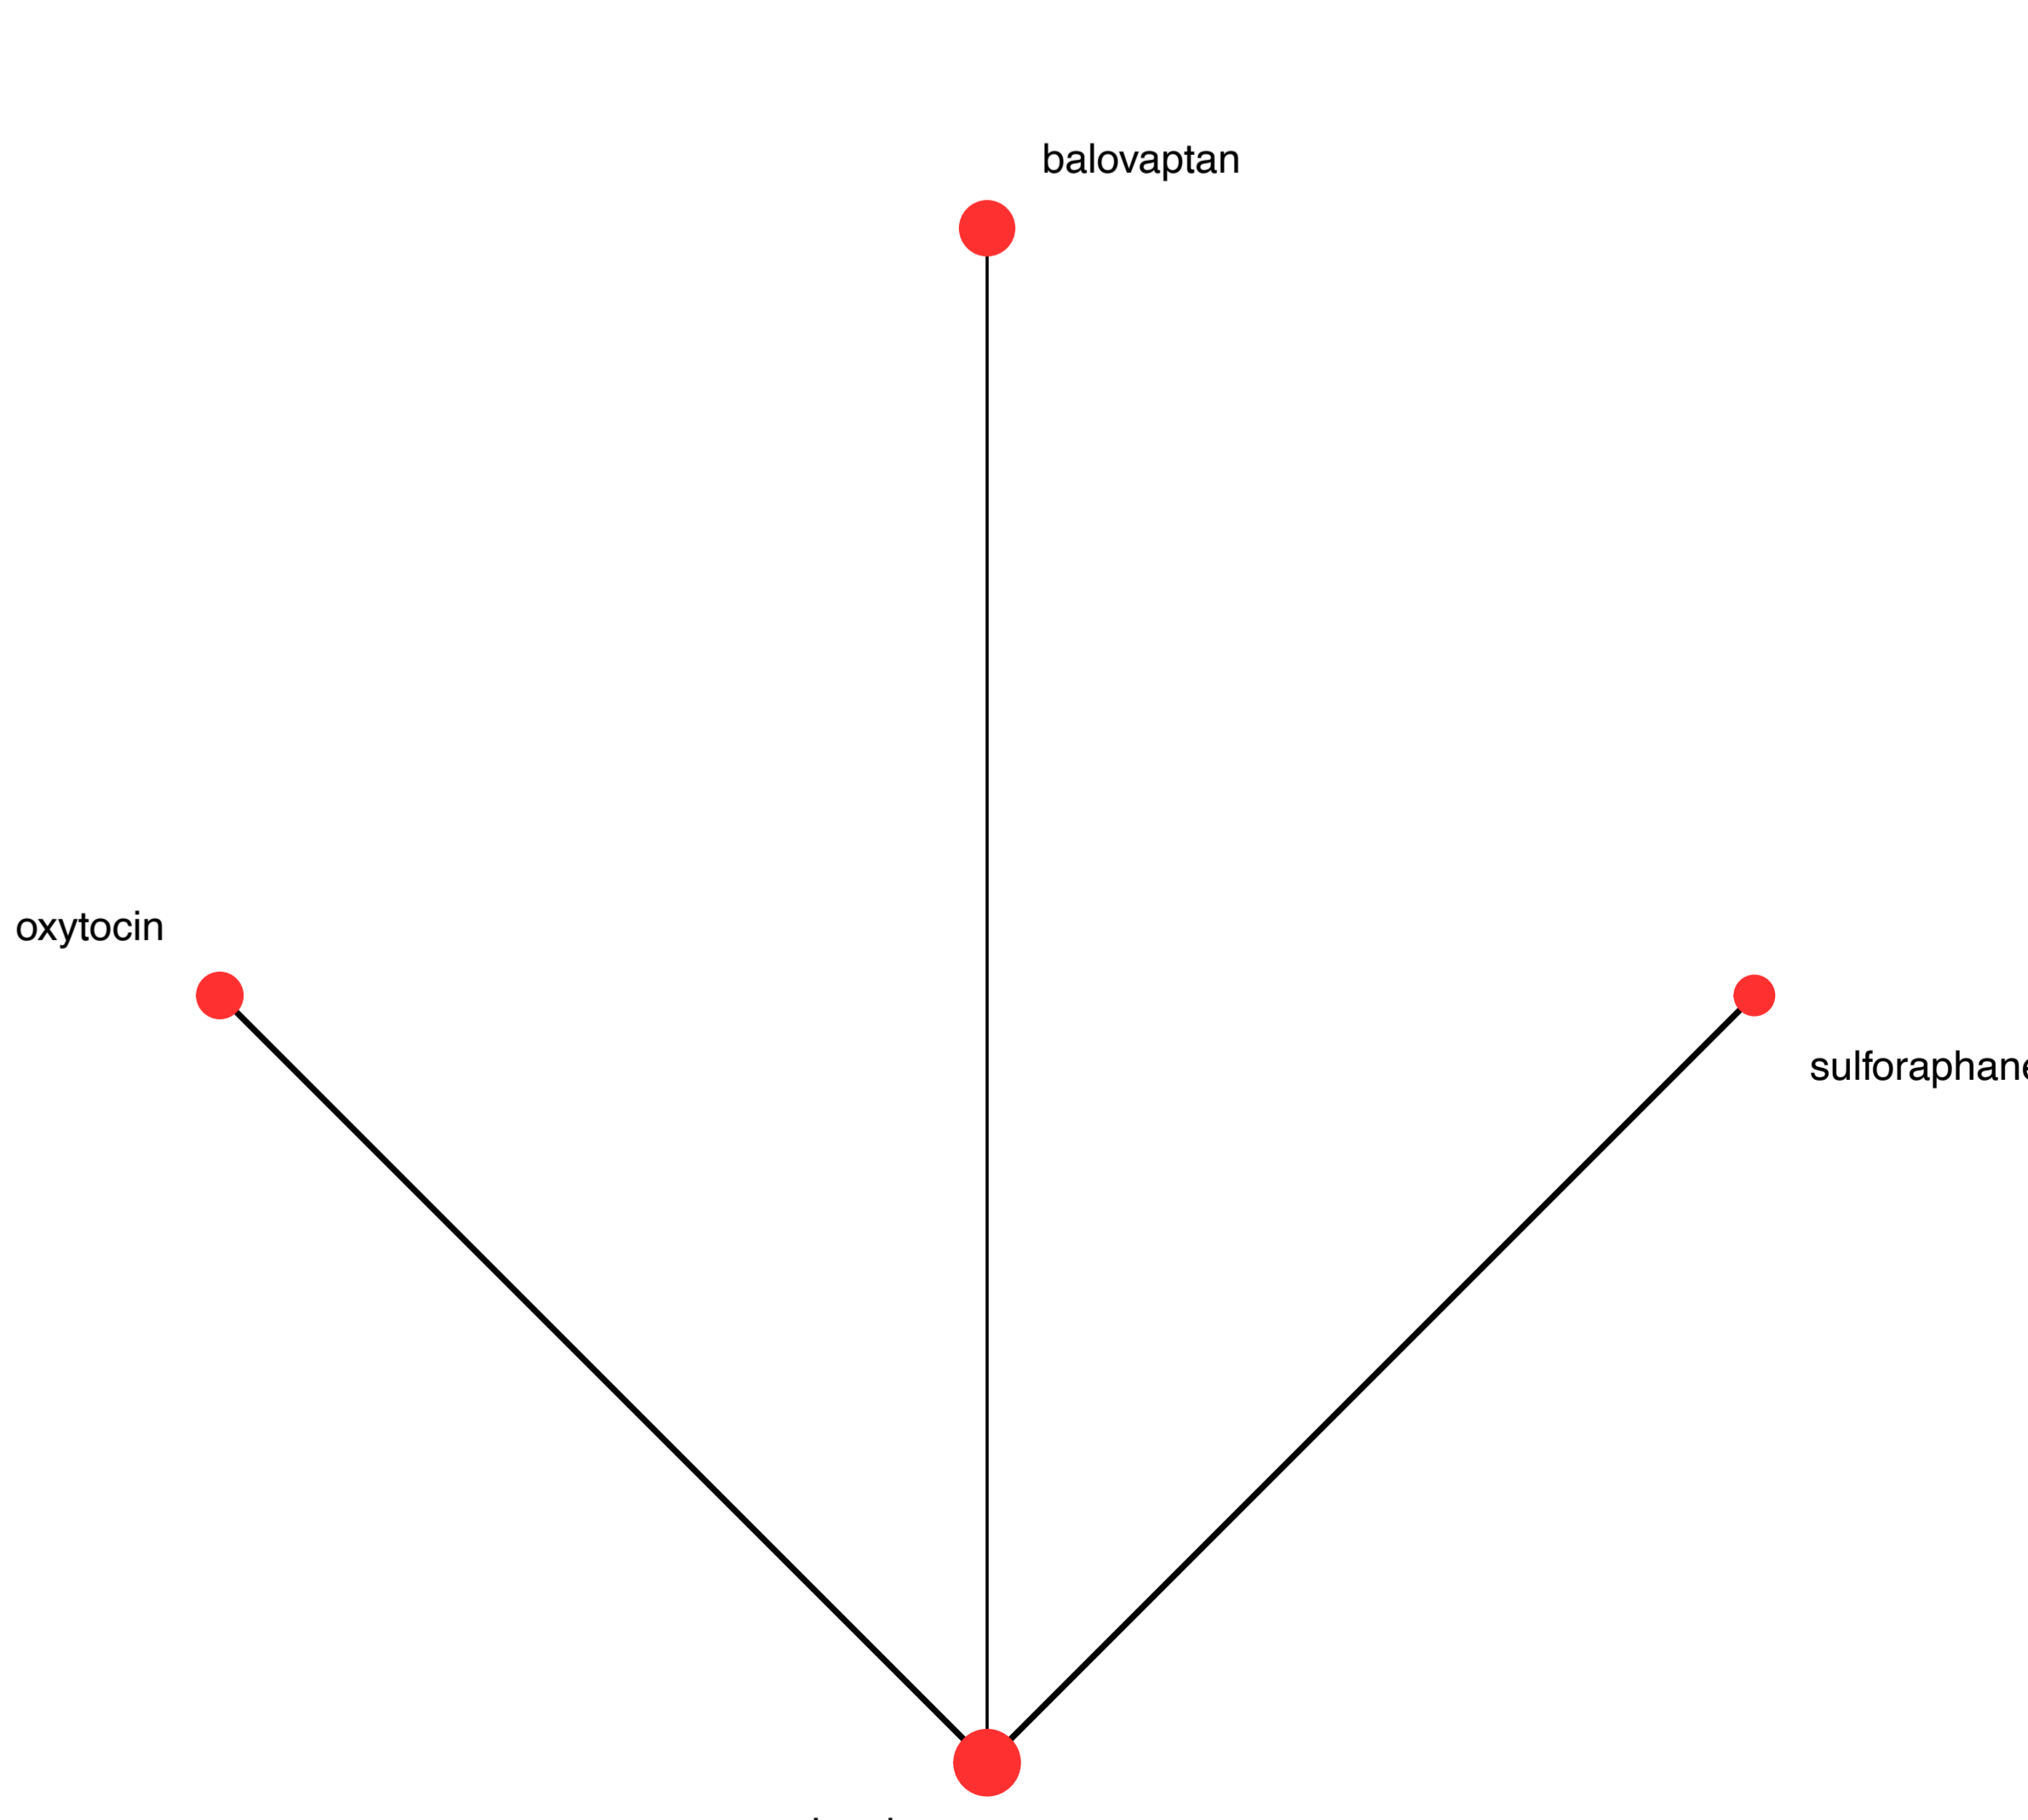

Supplement: Supplementary file 2 — Additional file 2. Fig. S1. Network plots. [file 13229_2022_488_MOESM2_ESM.pdf]
