# Supplementary material for: Pharmacological and dietary-supplement treatments for autism spectrum disorder: a systematic review and network meta-analysis
Source: Springer Nature journal article supplement (doi:10.1186/s13229-022-00488-4), 2022-03-04

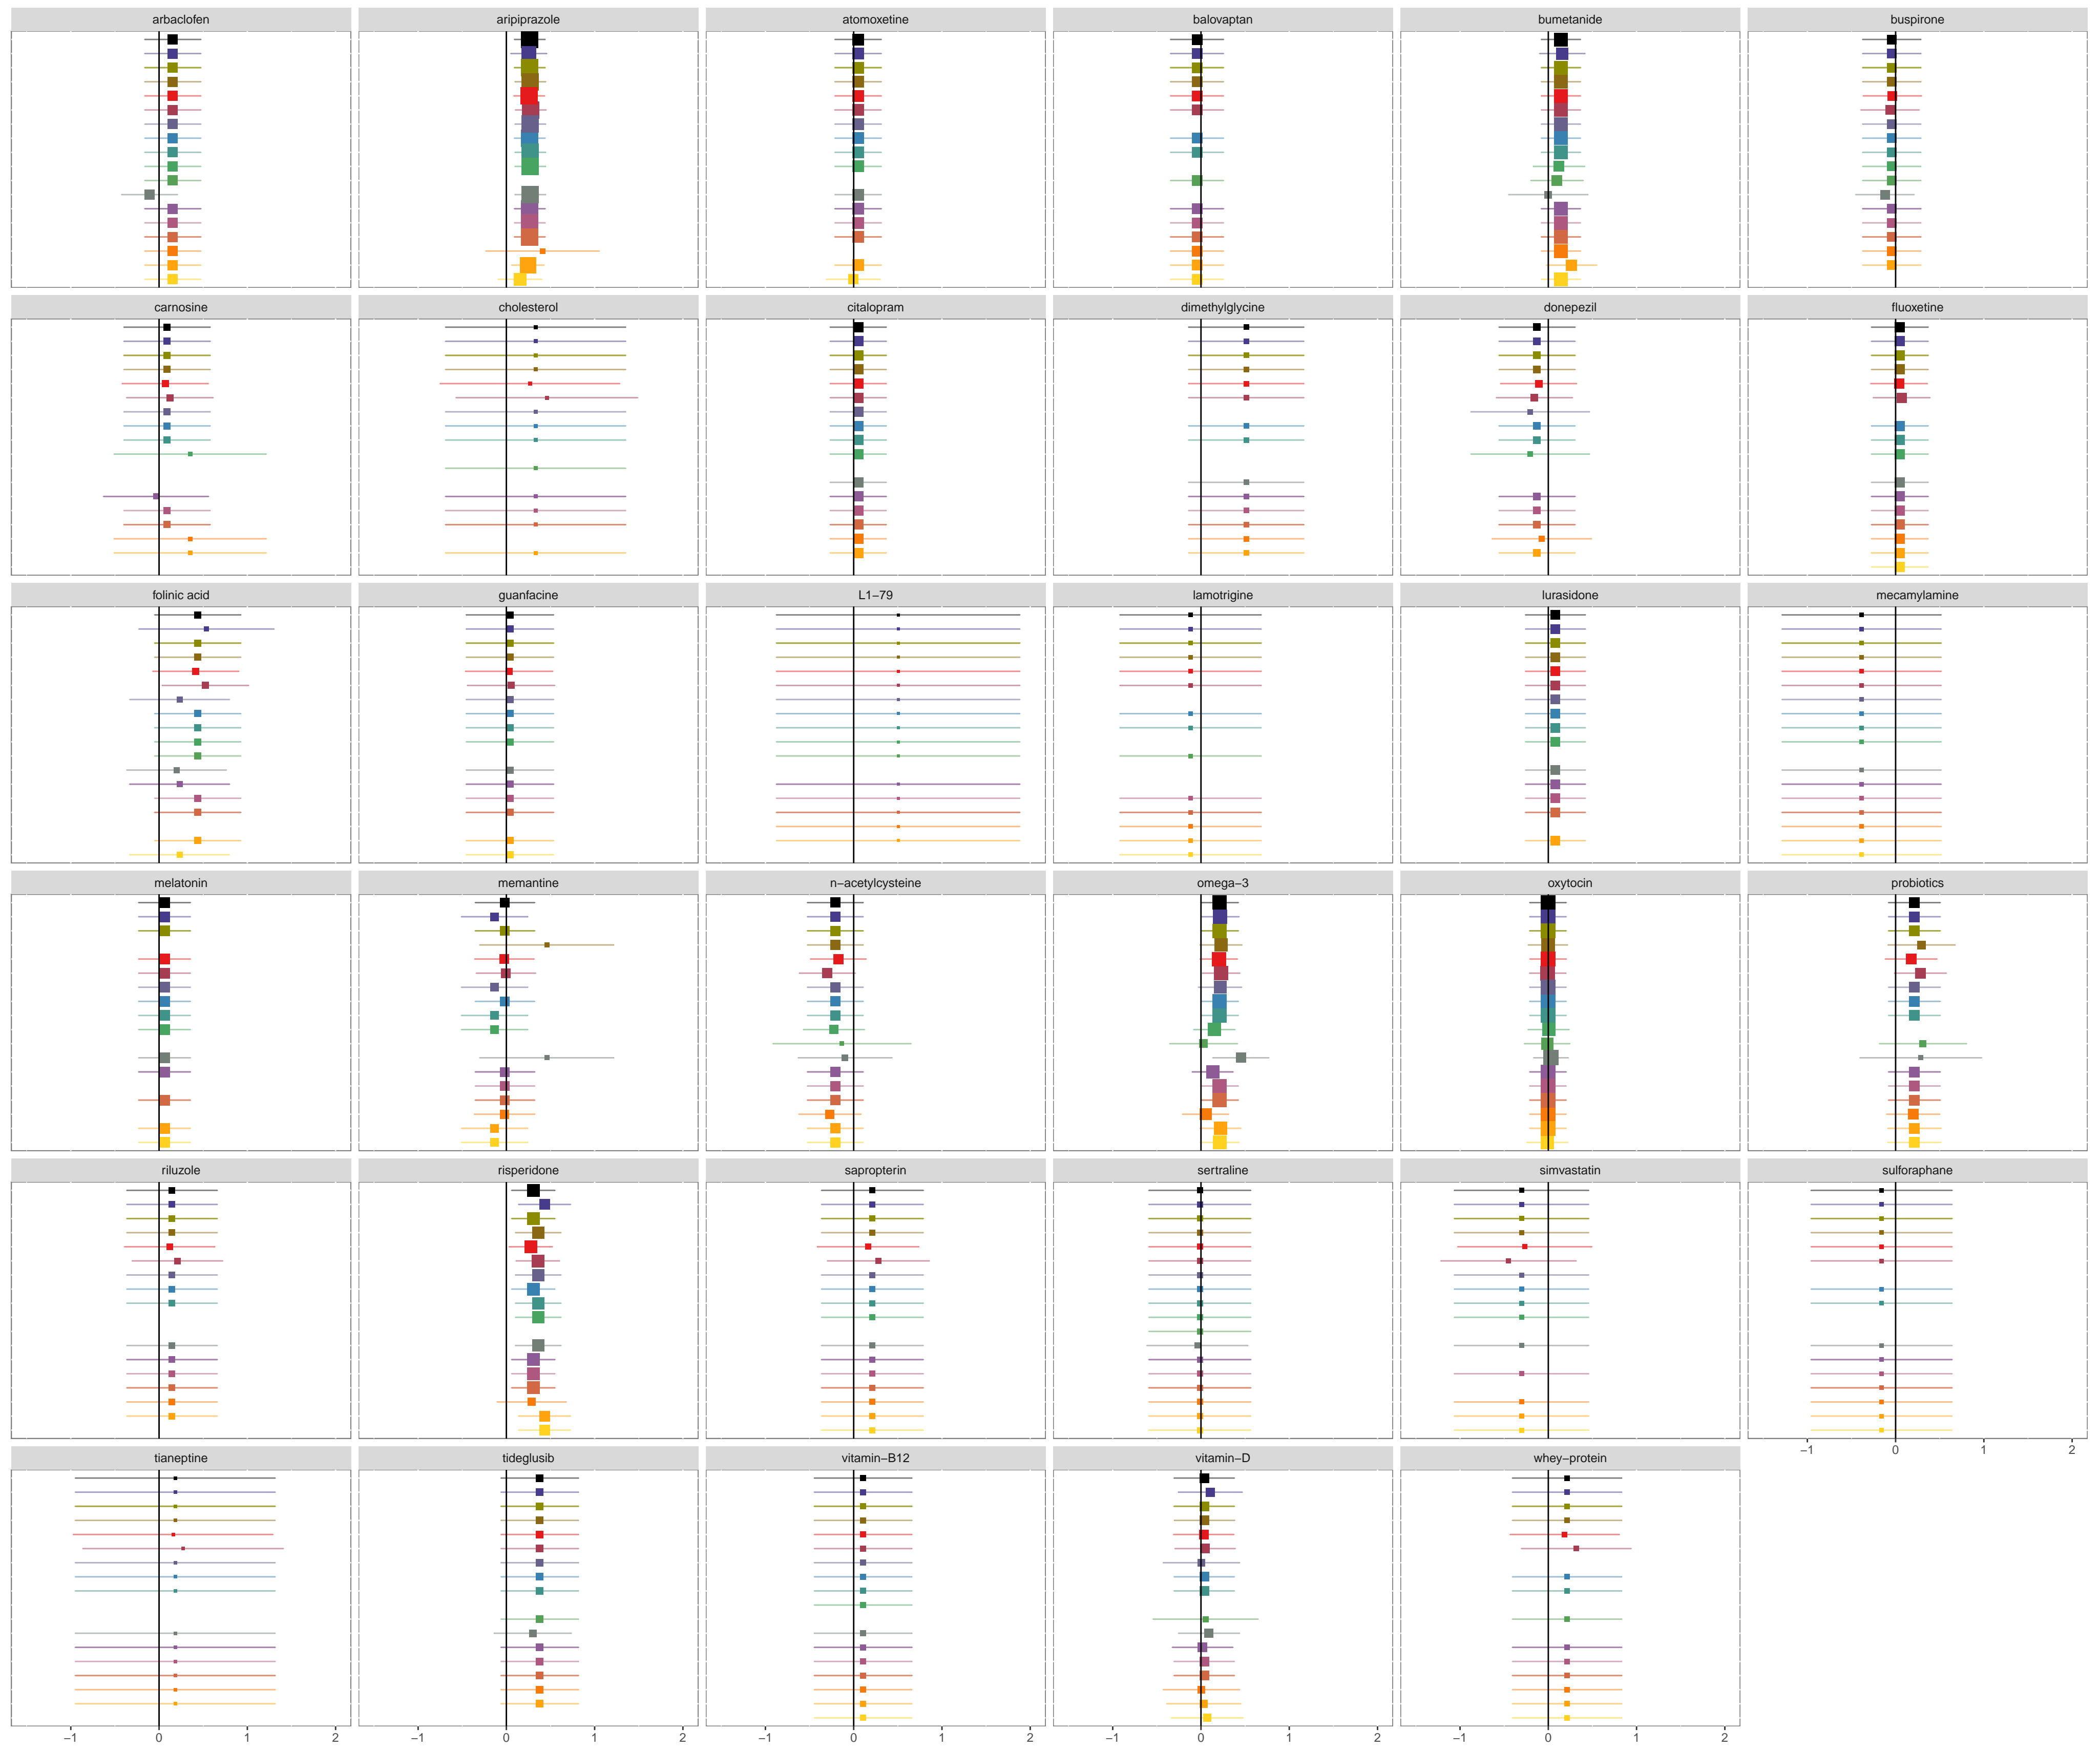

- 01. main
- 02. pairwise
- 03. fixed-effects
- 04. nonimputed SDs
- 05.  $r=0.25$
- 06.  $r=0.75$
- 07. low/moderate RoB
- 08. nonassumed randomization
- 09. blinded trials
- 10. ITT
- 11. clinician ratings
- 12. ABC-L/SW
- 13. DSM/ICD
- 14. >3 weeks
- 15. no genetic syndrome
- 16. no associated symptoms
- 17. more developed countries
- 18. low RoB (sequence/concealment)

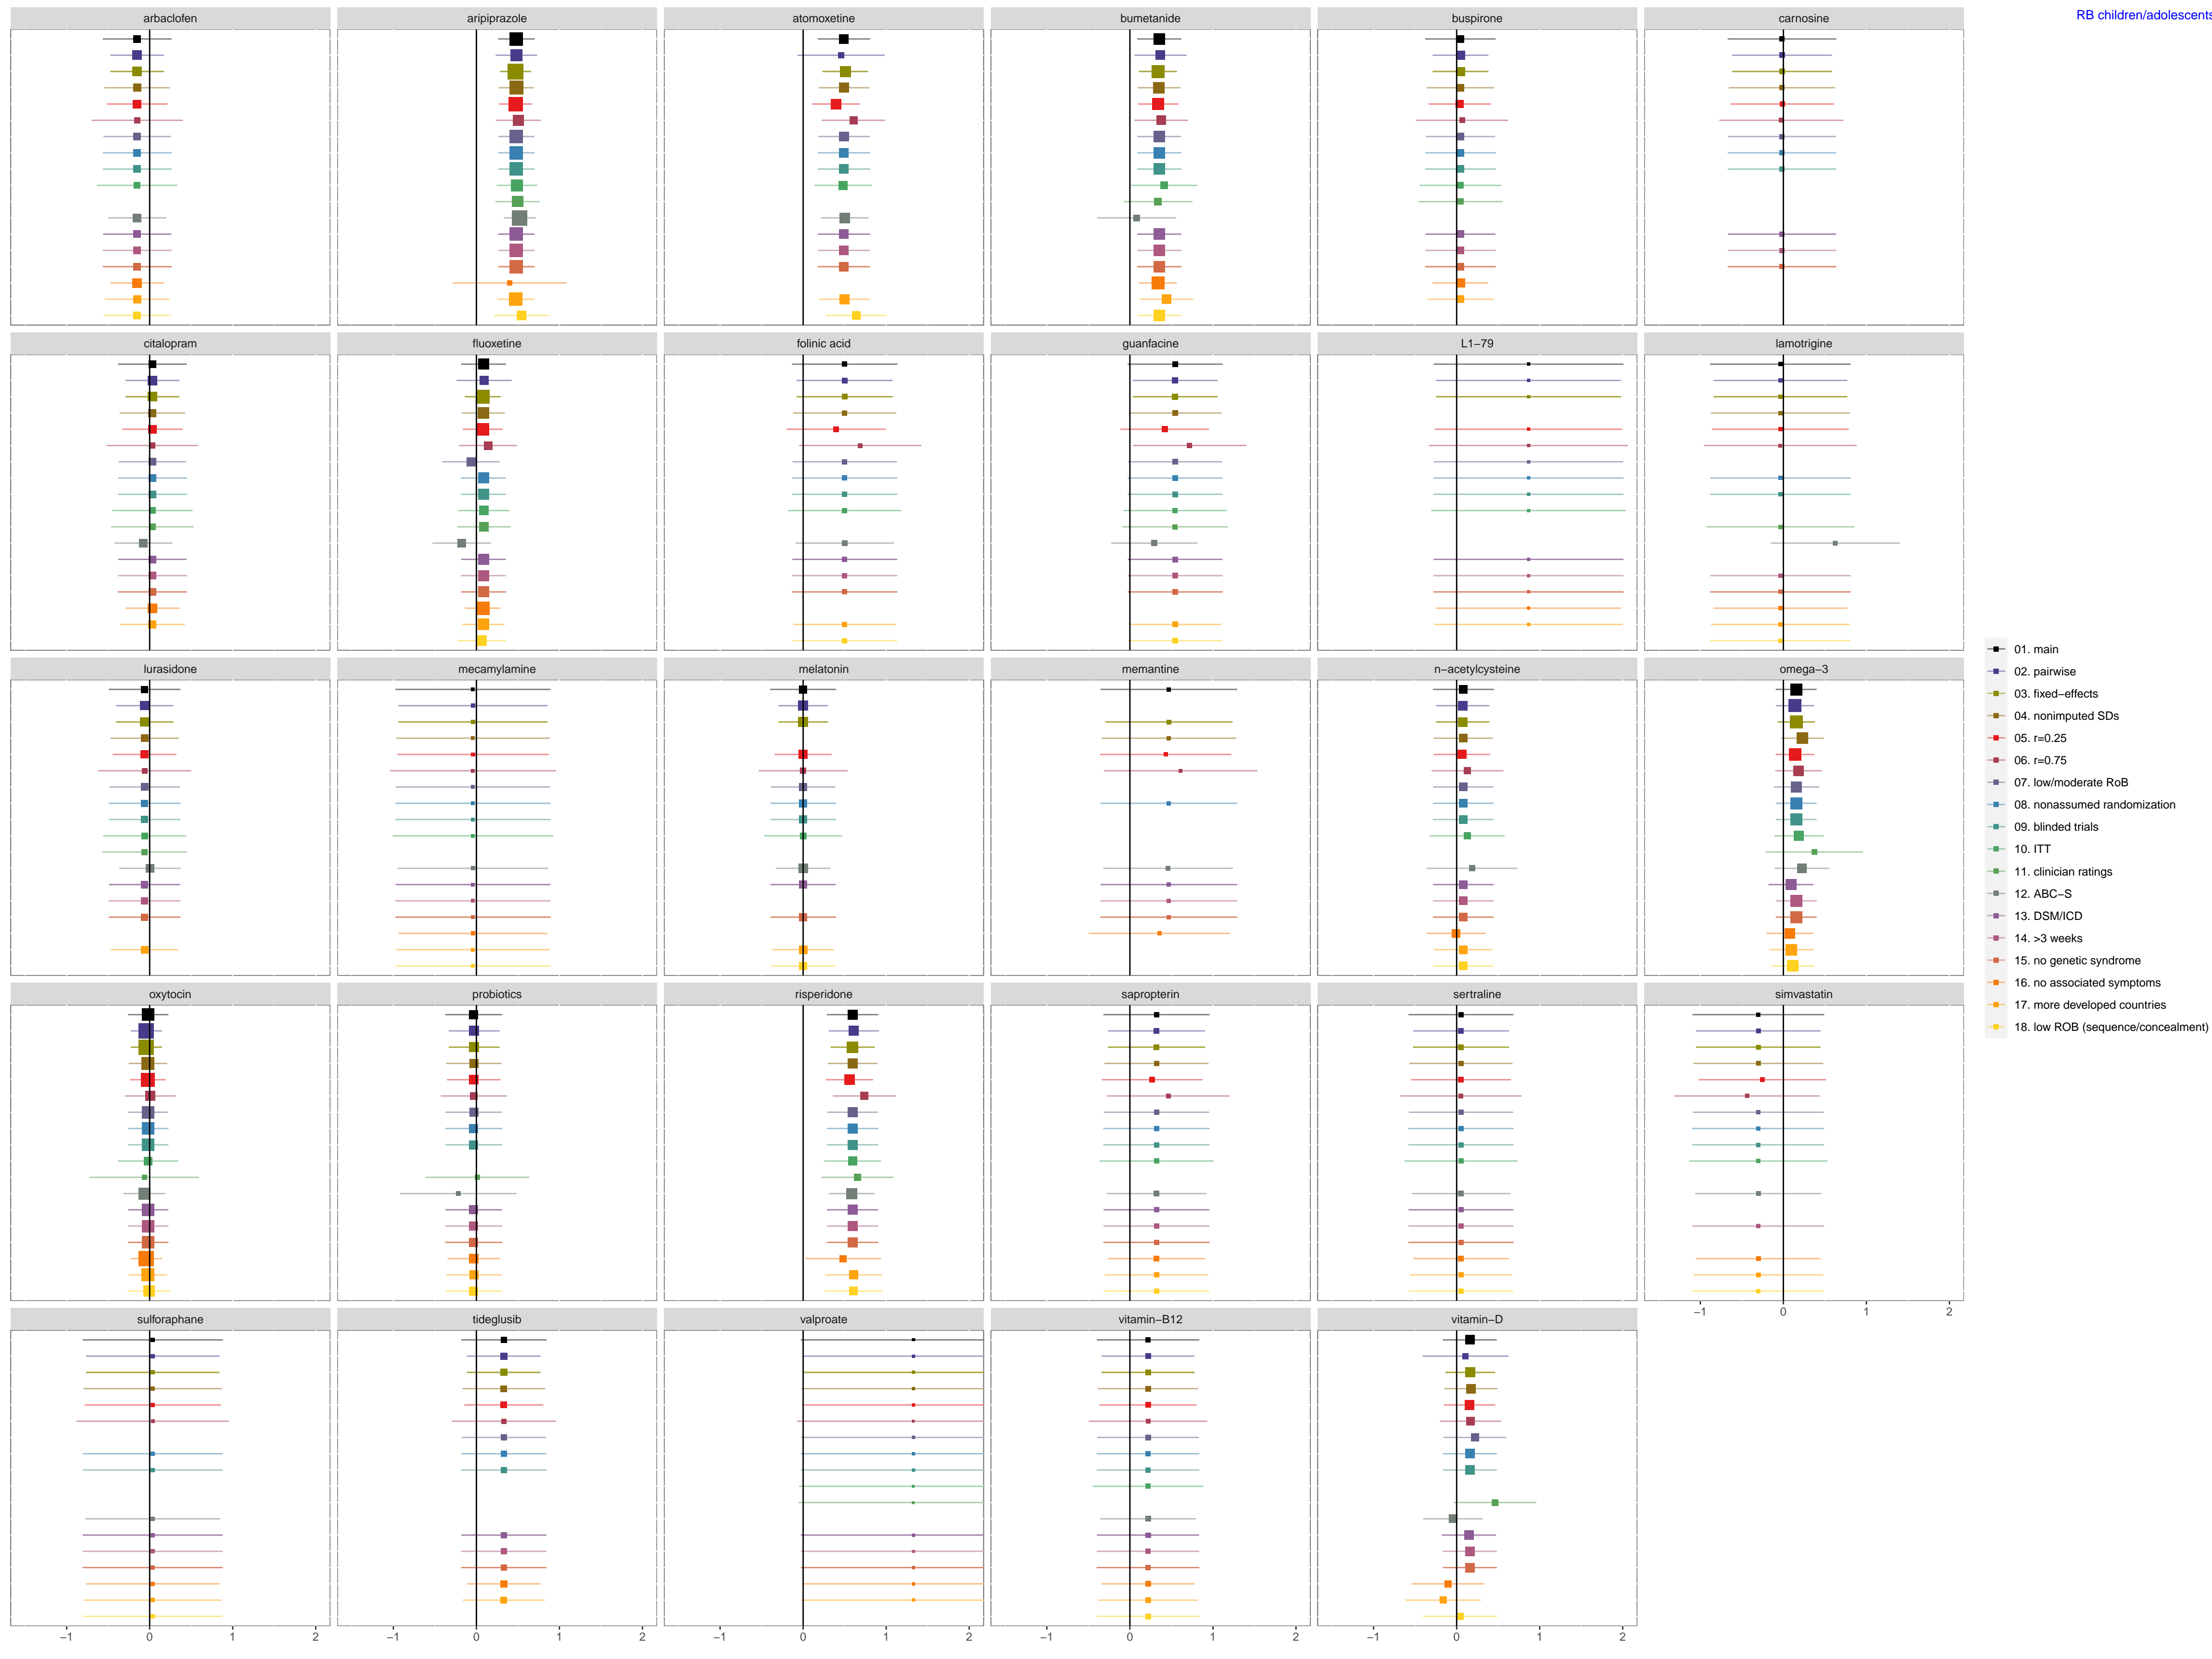

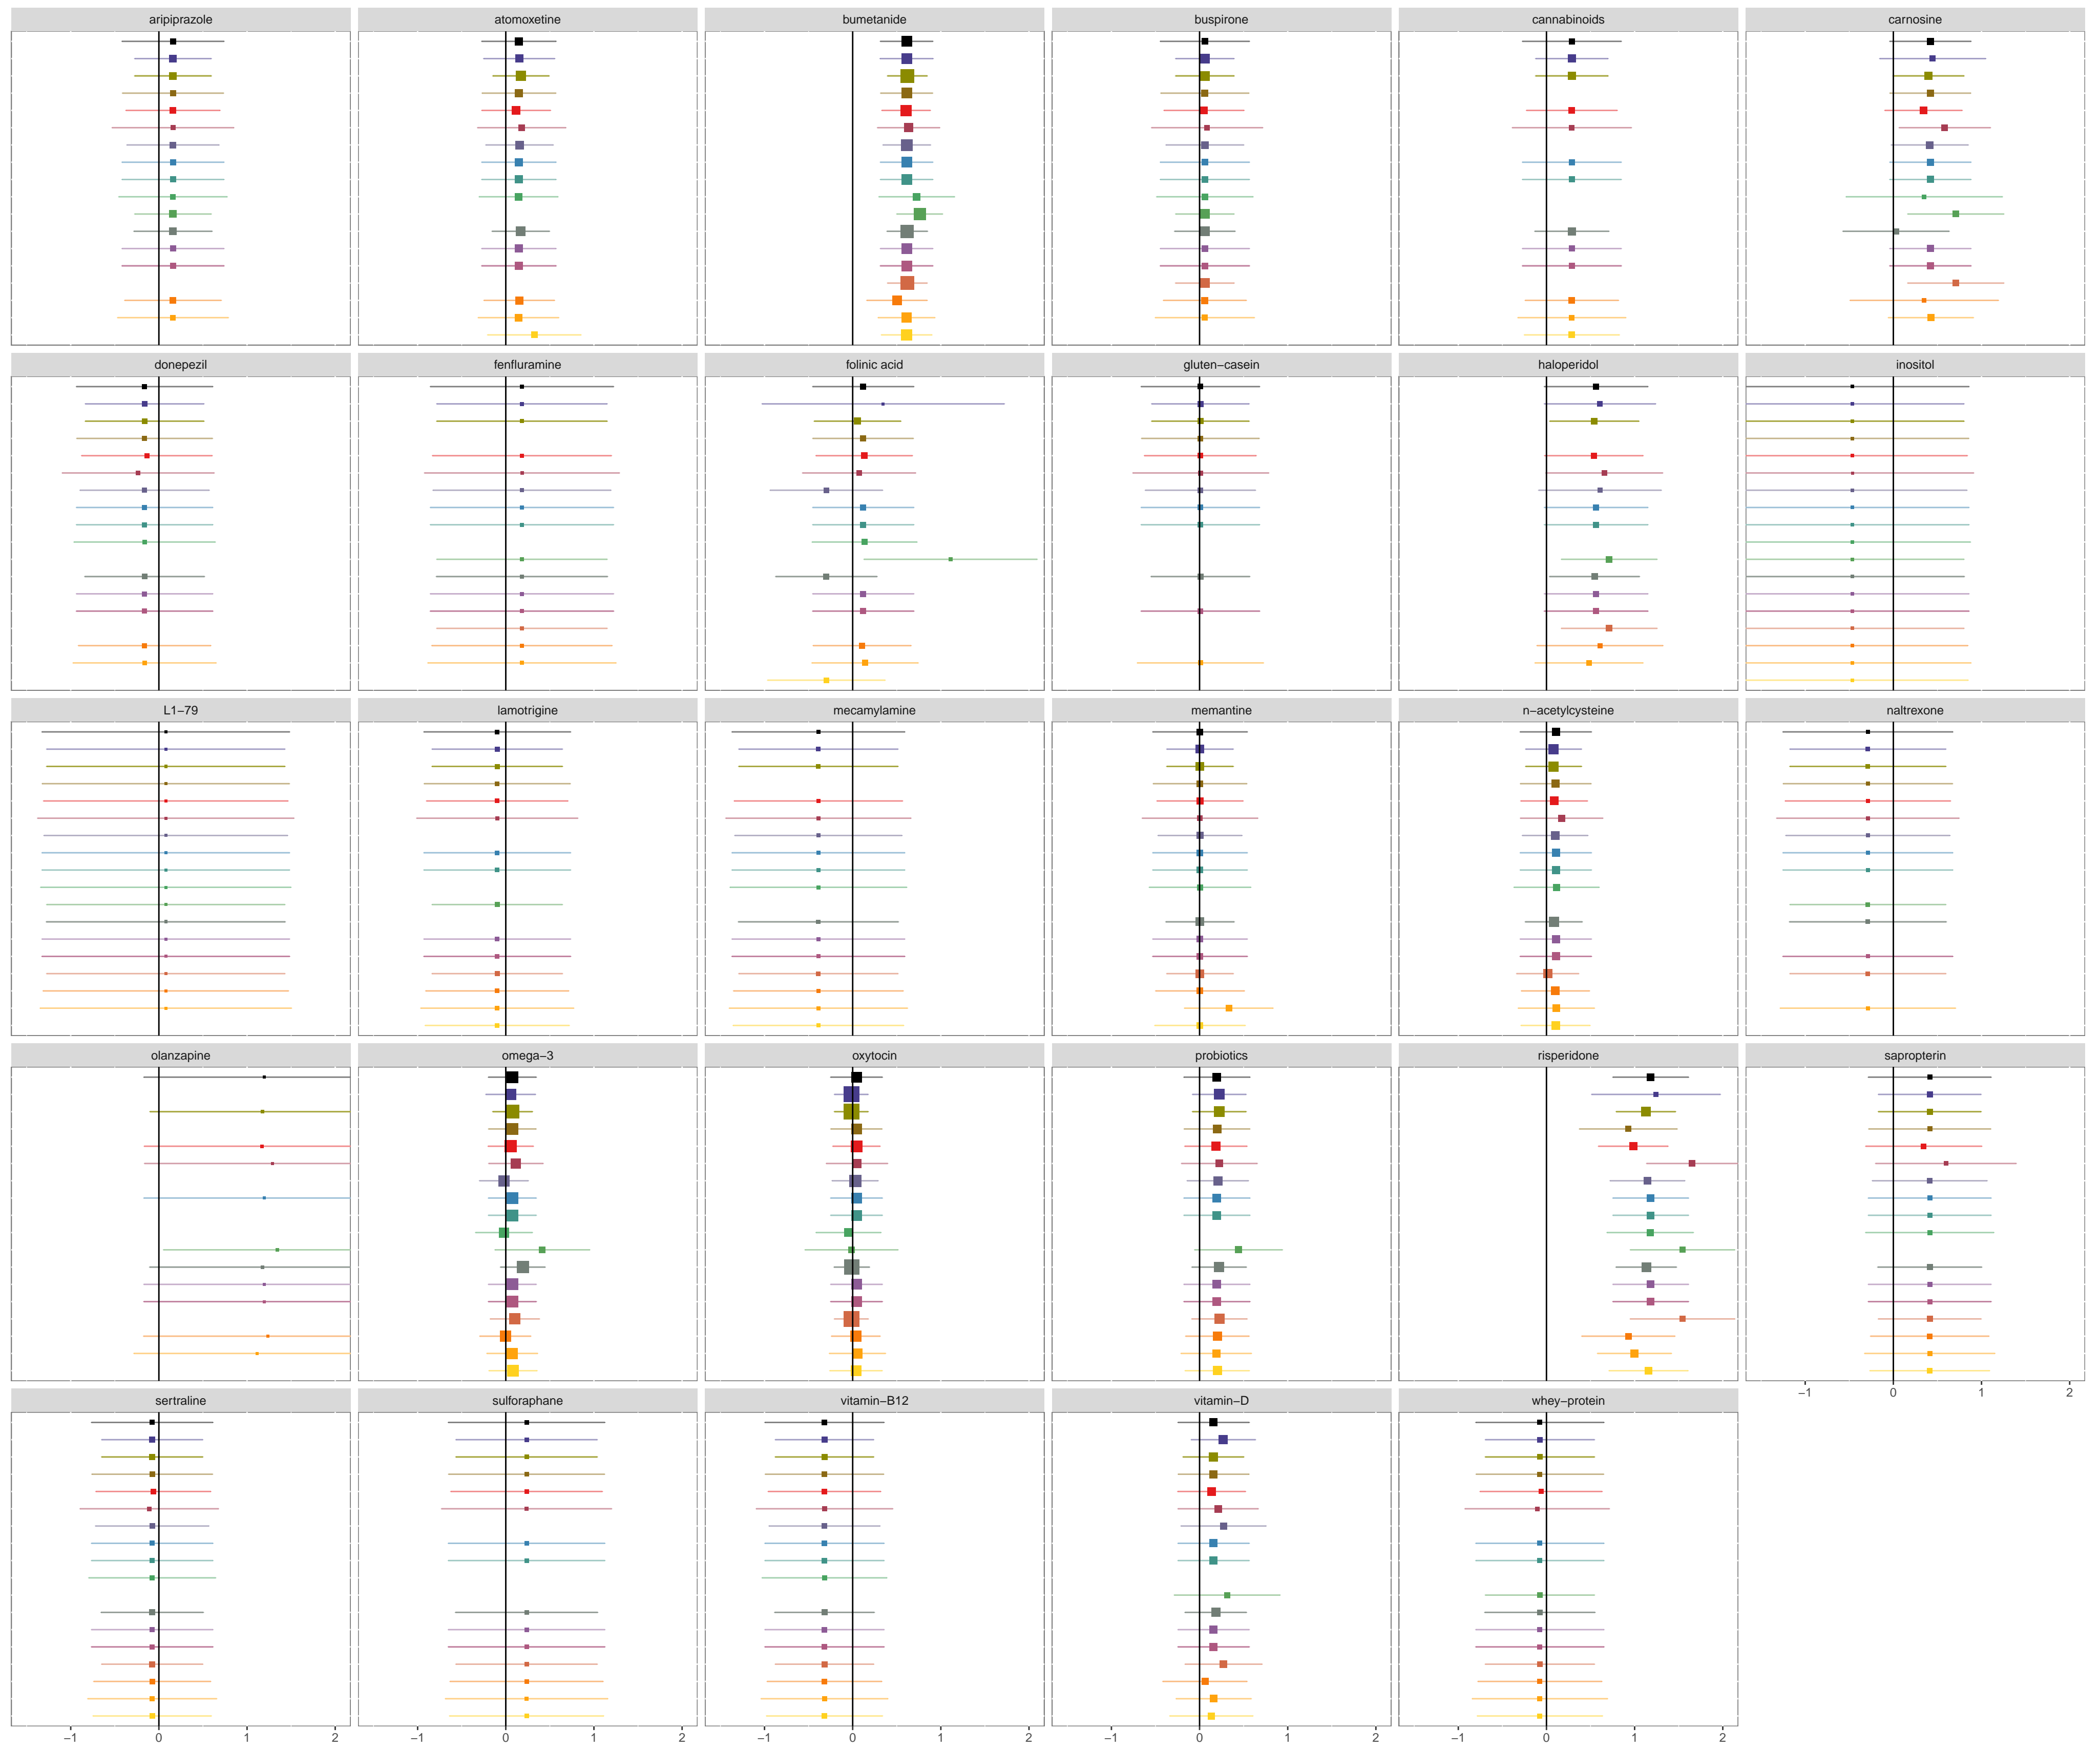

- 01. main
- 02. pairwise
- 03. fixed-effects
- 04. nonimputed SDs
- 05.  $r=0.25$
- 06.  $r=0.75$
- 07. low/moderate RoB
- 08. nonassumed randomization
- 09. blinded trials
- 10. ITT
- 11. clinician ratings
- 12. DSM/ICD
- 13. >3 weeks
- 14. no genetic syndrome
- 15. no associated symptoms
- 16. more developed countries
- 17. including Nikvarz 2017
- 18. low ROB (sequence/concealment)

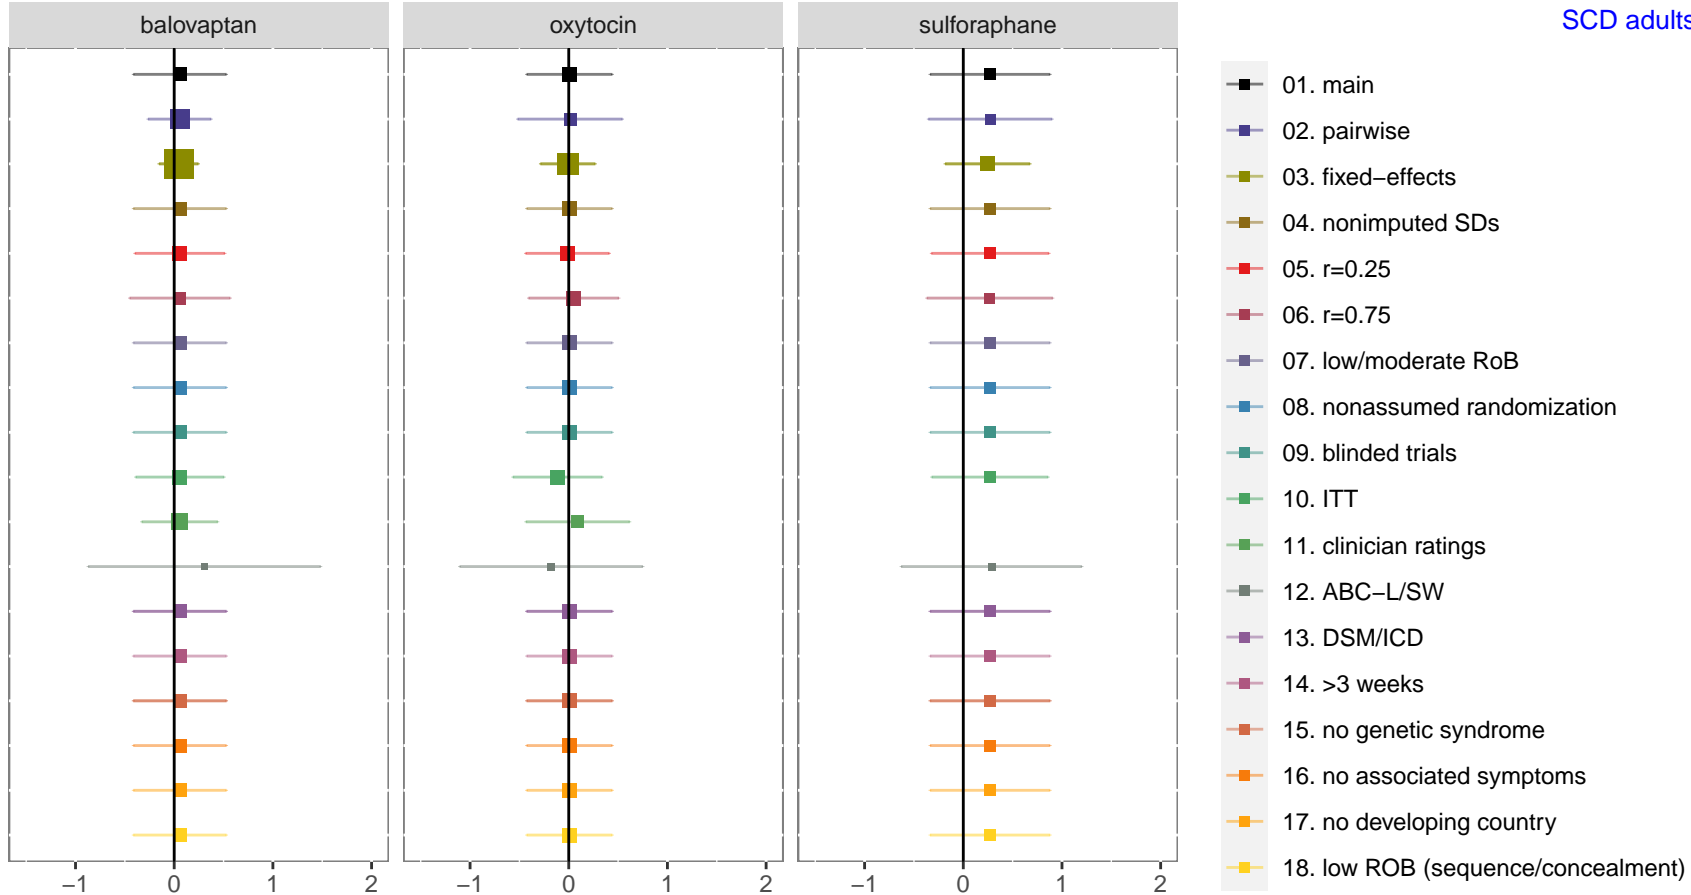



balovaptan

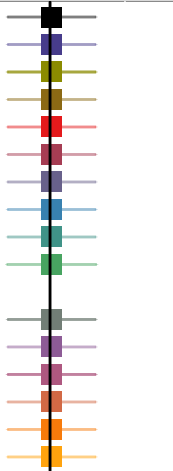

oxytocin

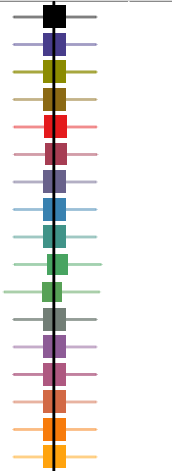

risperidone

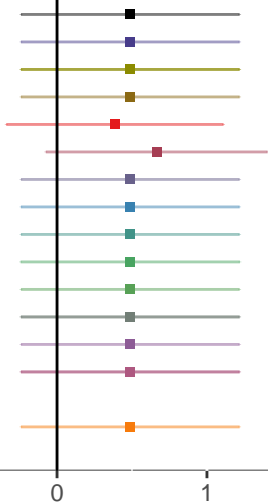

sulforaphane

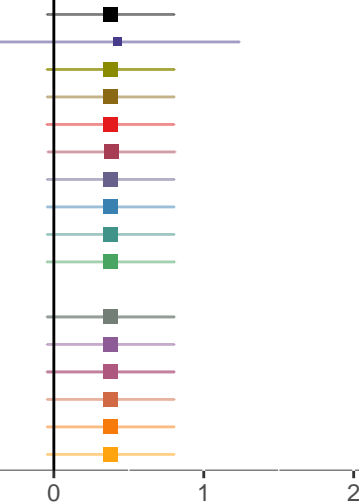

- 01. main
- 02. pairwise
- 03. fixed-effects
- 04. nonimputed SDs
- 05.  $r=0.25$
- 06.  $r=0.75$
- 07. low/moderate RoB
- 08. nonassumed randomization
- 09. blinded trials
- 10. ITT
- 11. clinician ratings
- 12. DSM/ICD
- 13. >3 weeks
- 14. no genetic syndrome
- 15. no associated symptoms
- 16. no developing country
- 17. low ROB (sequence/concealment)

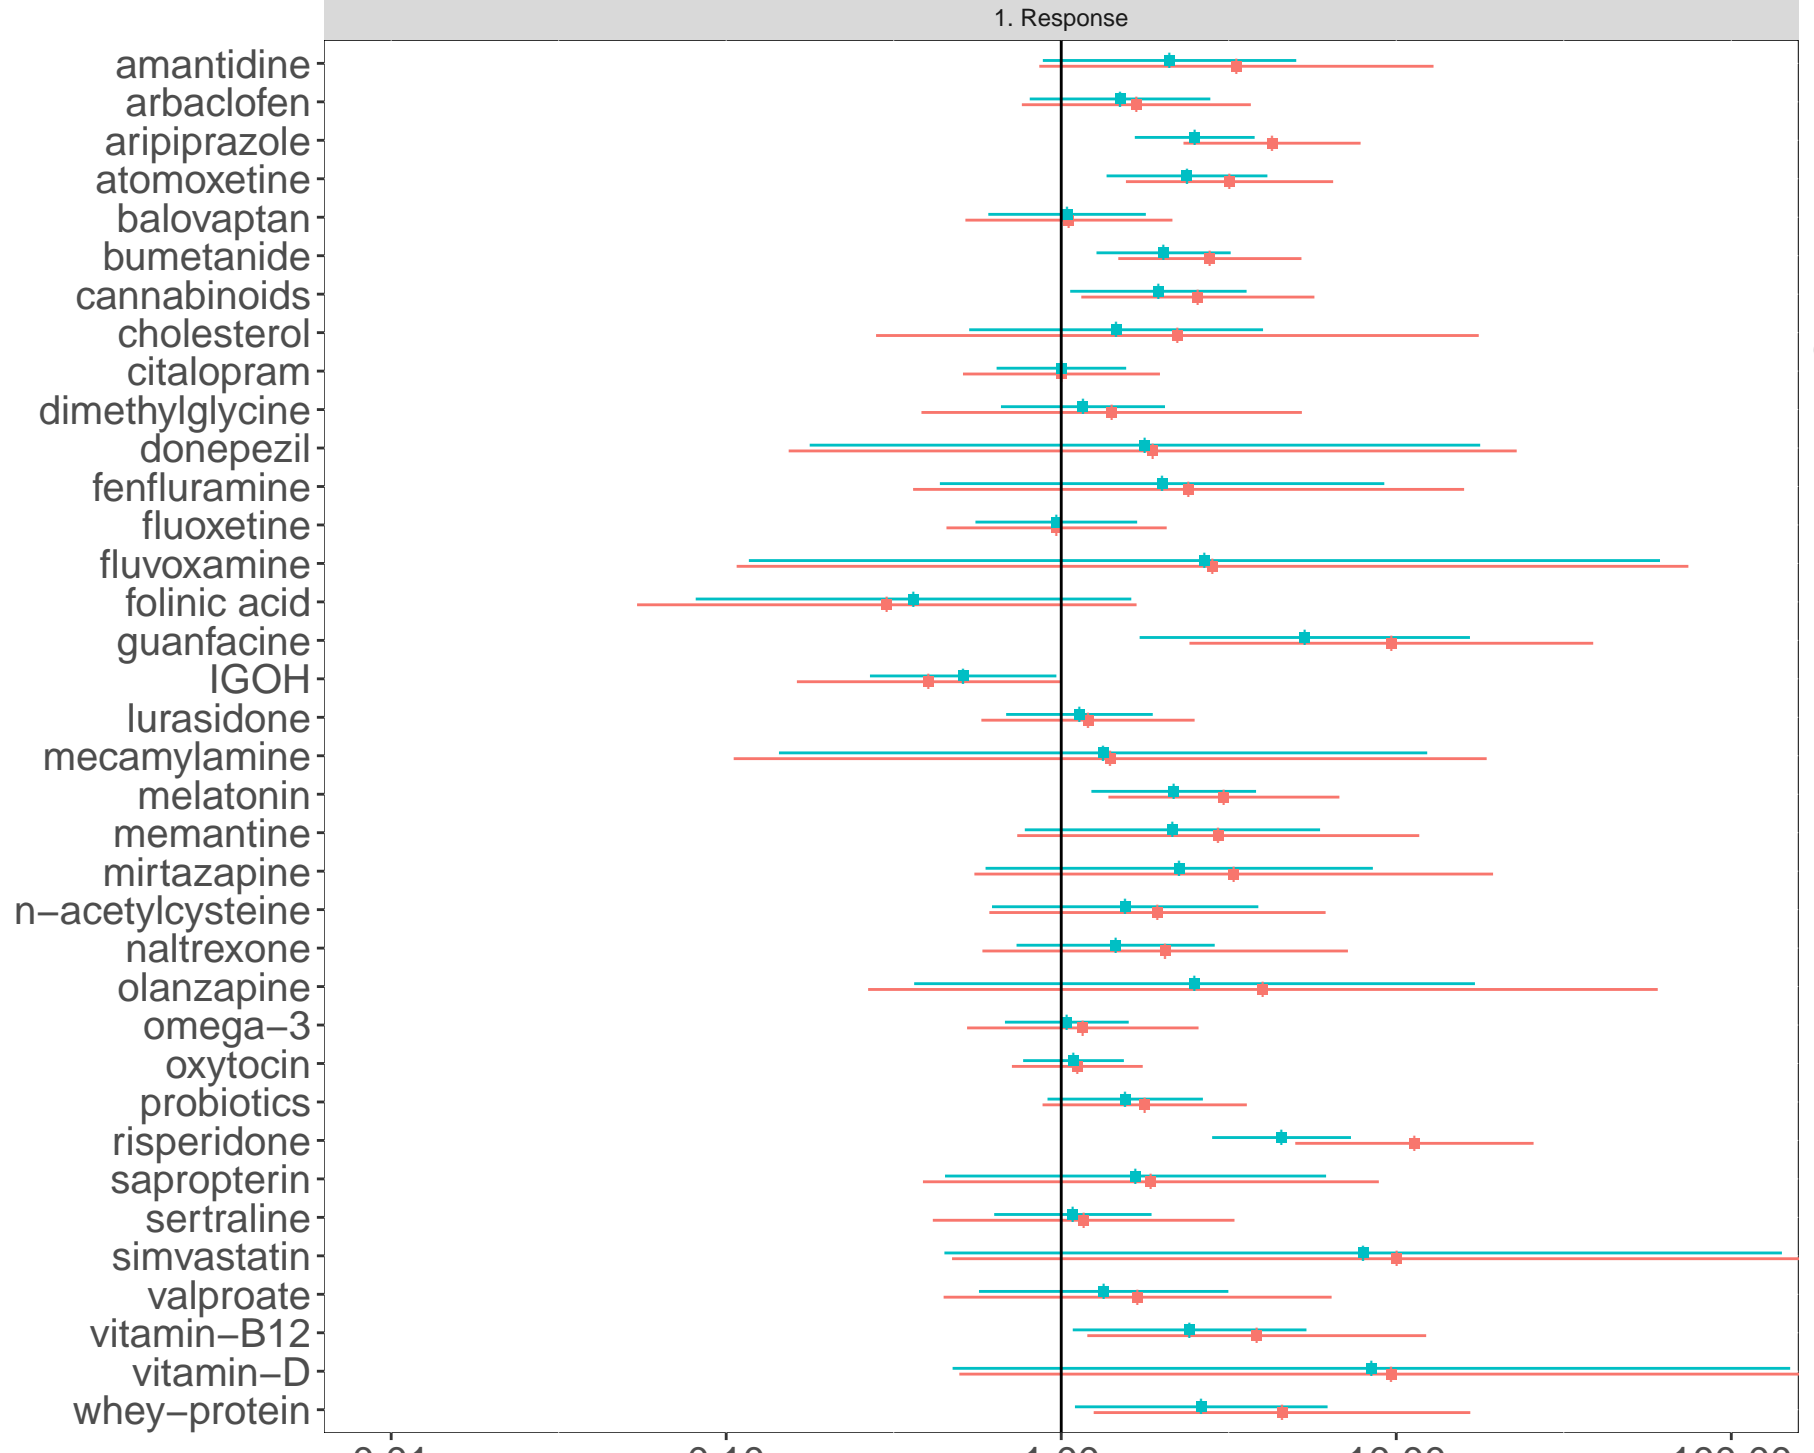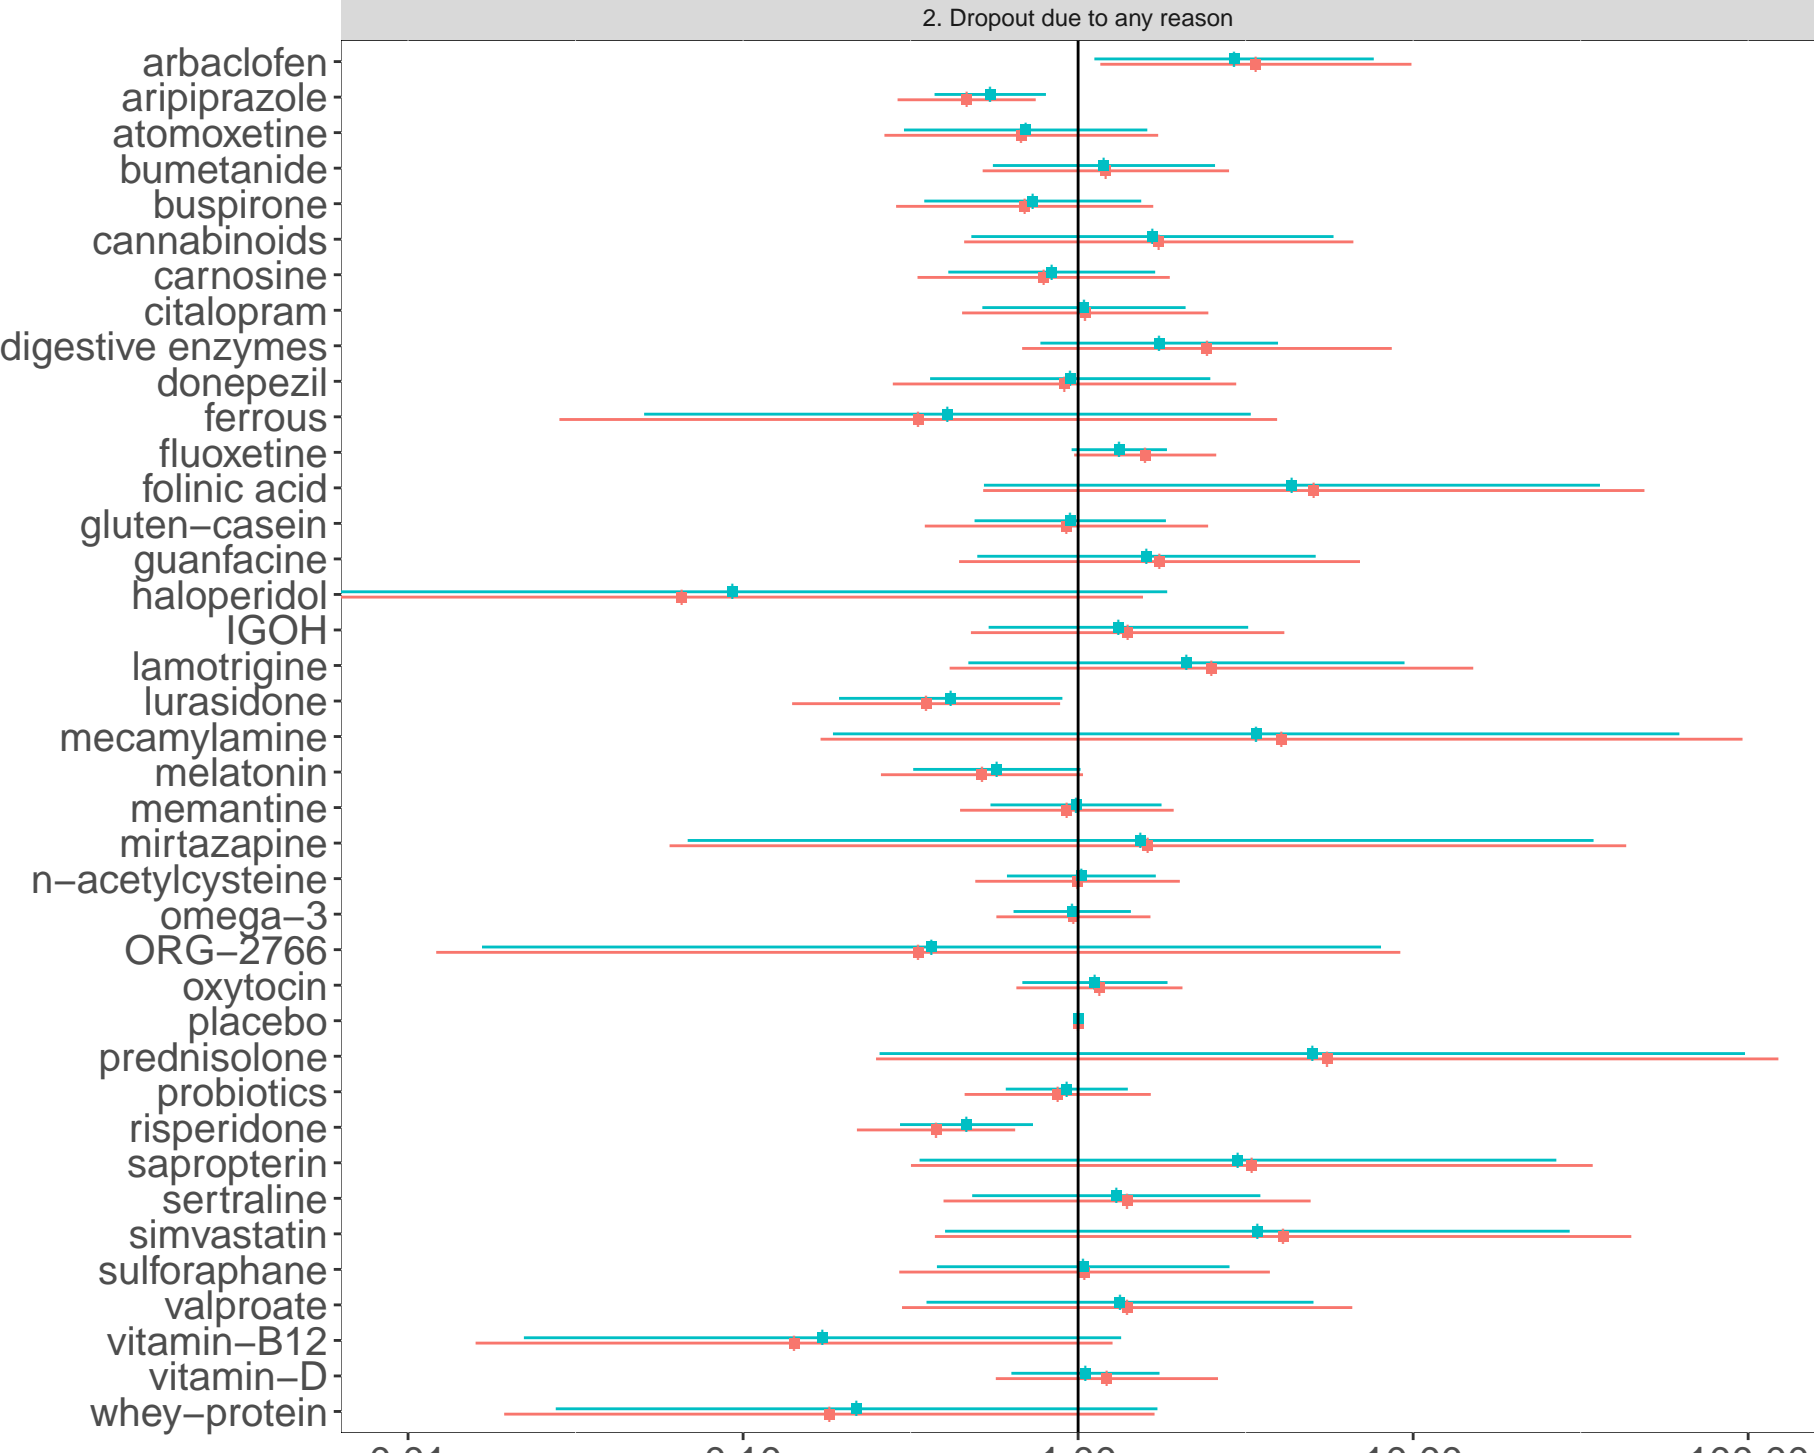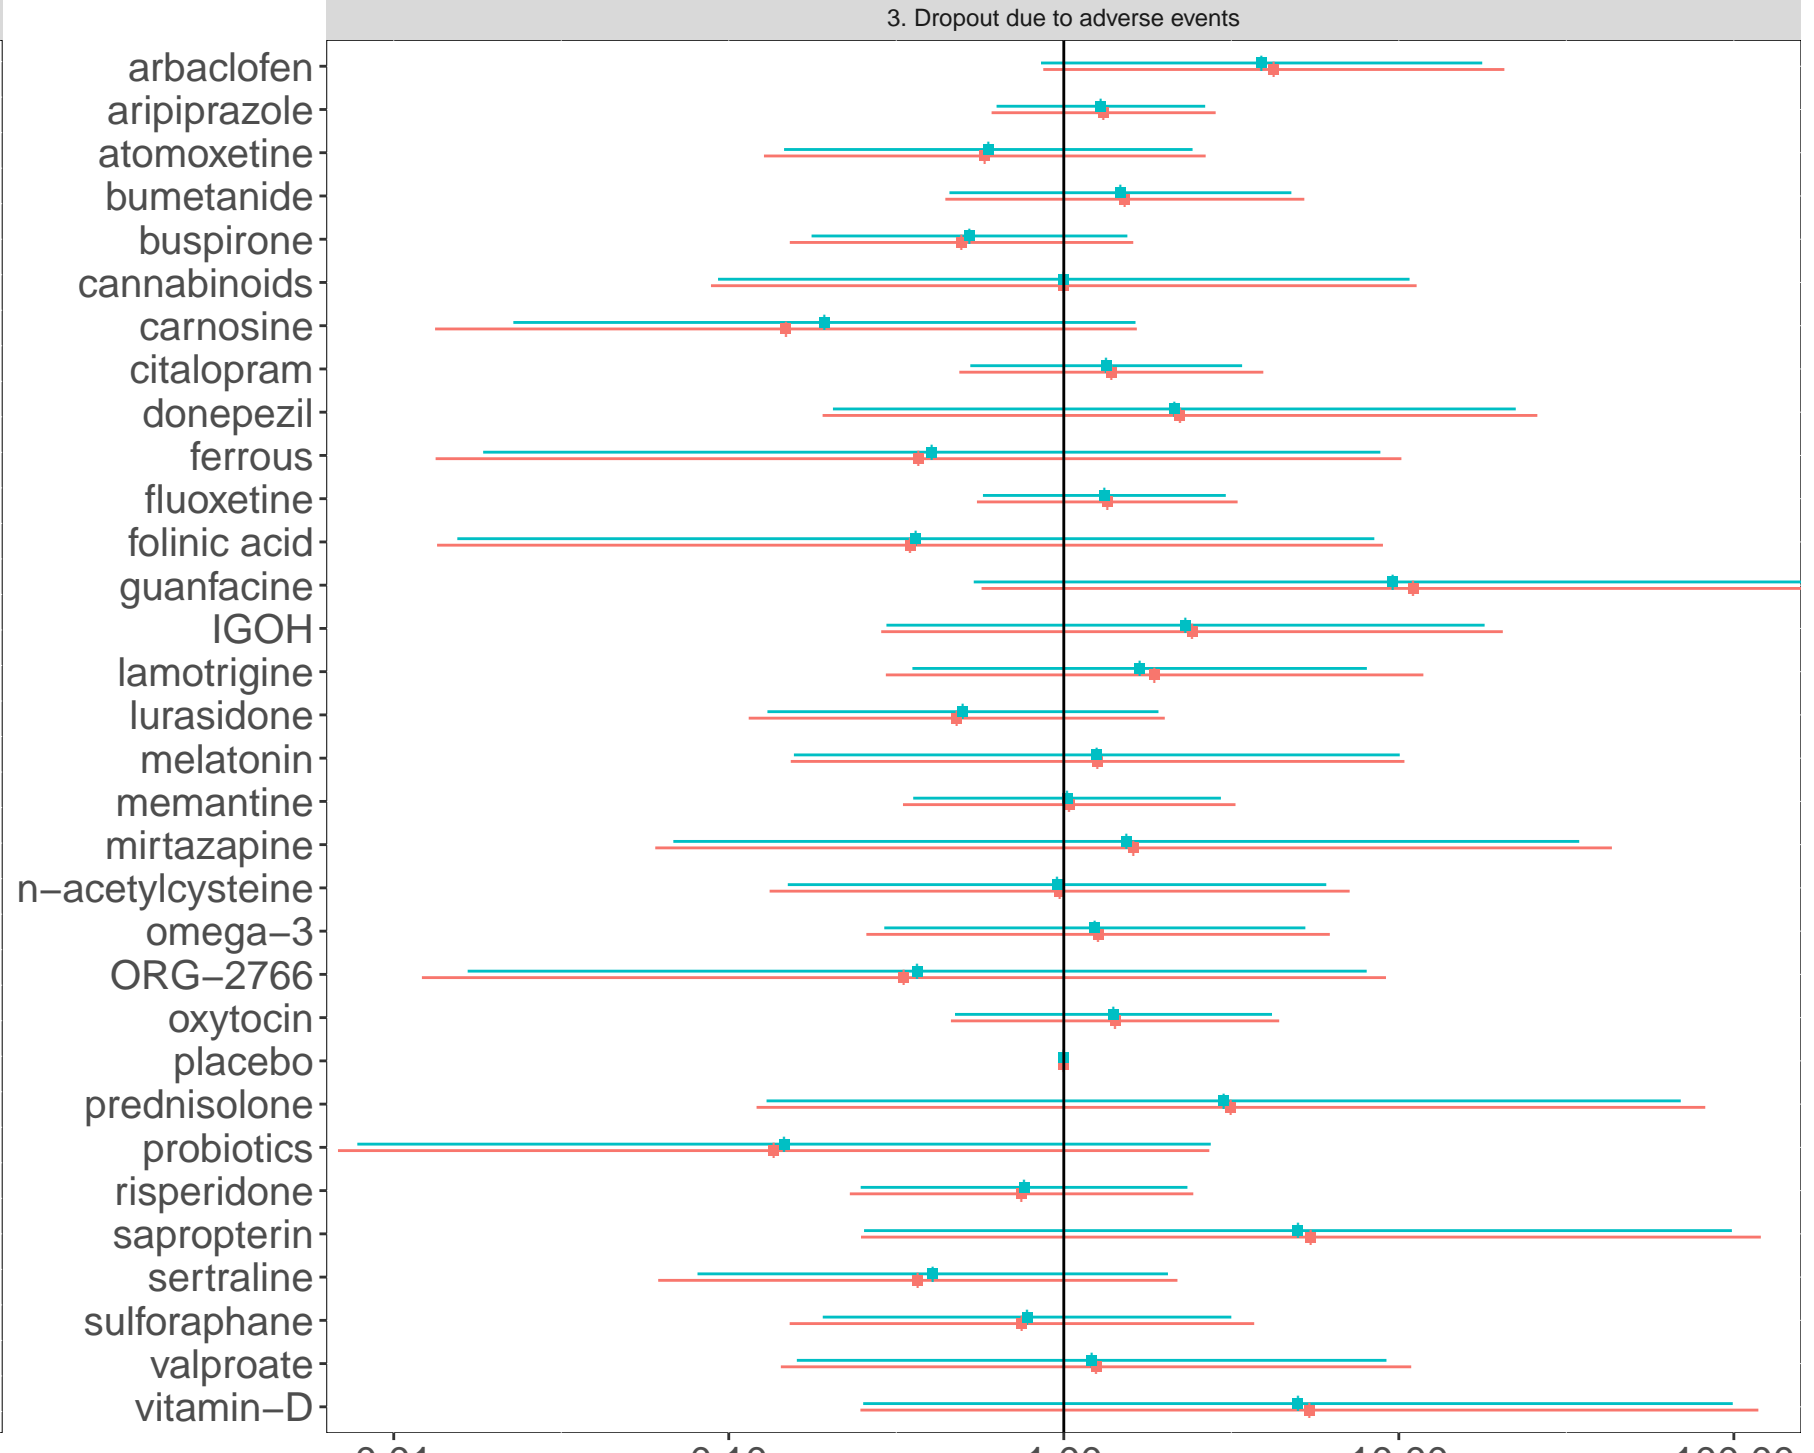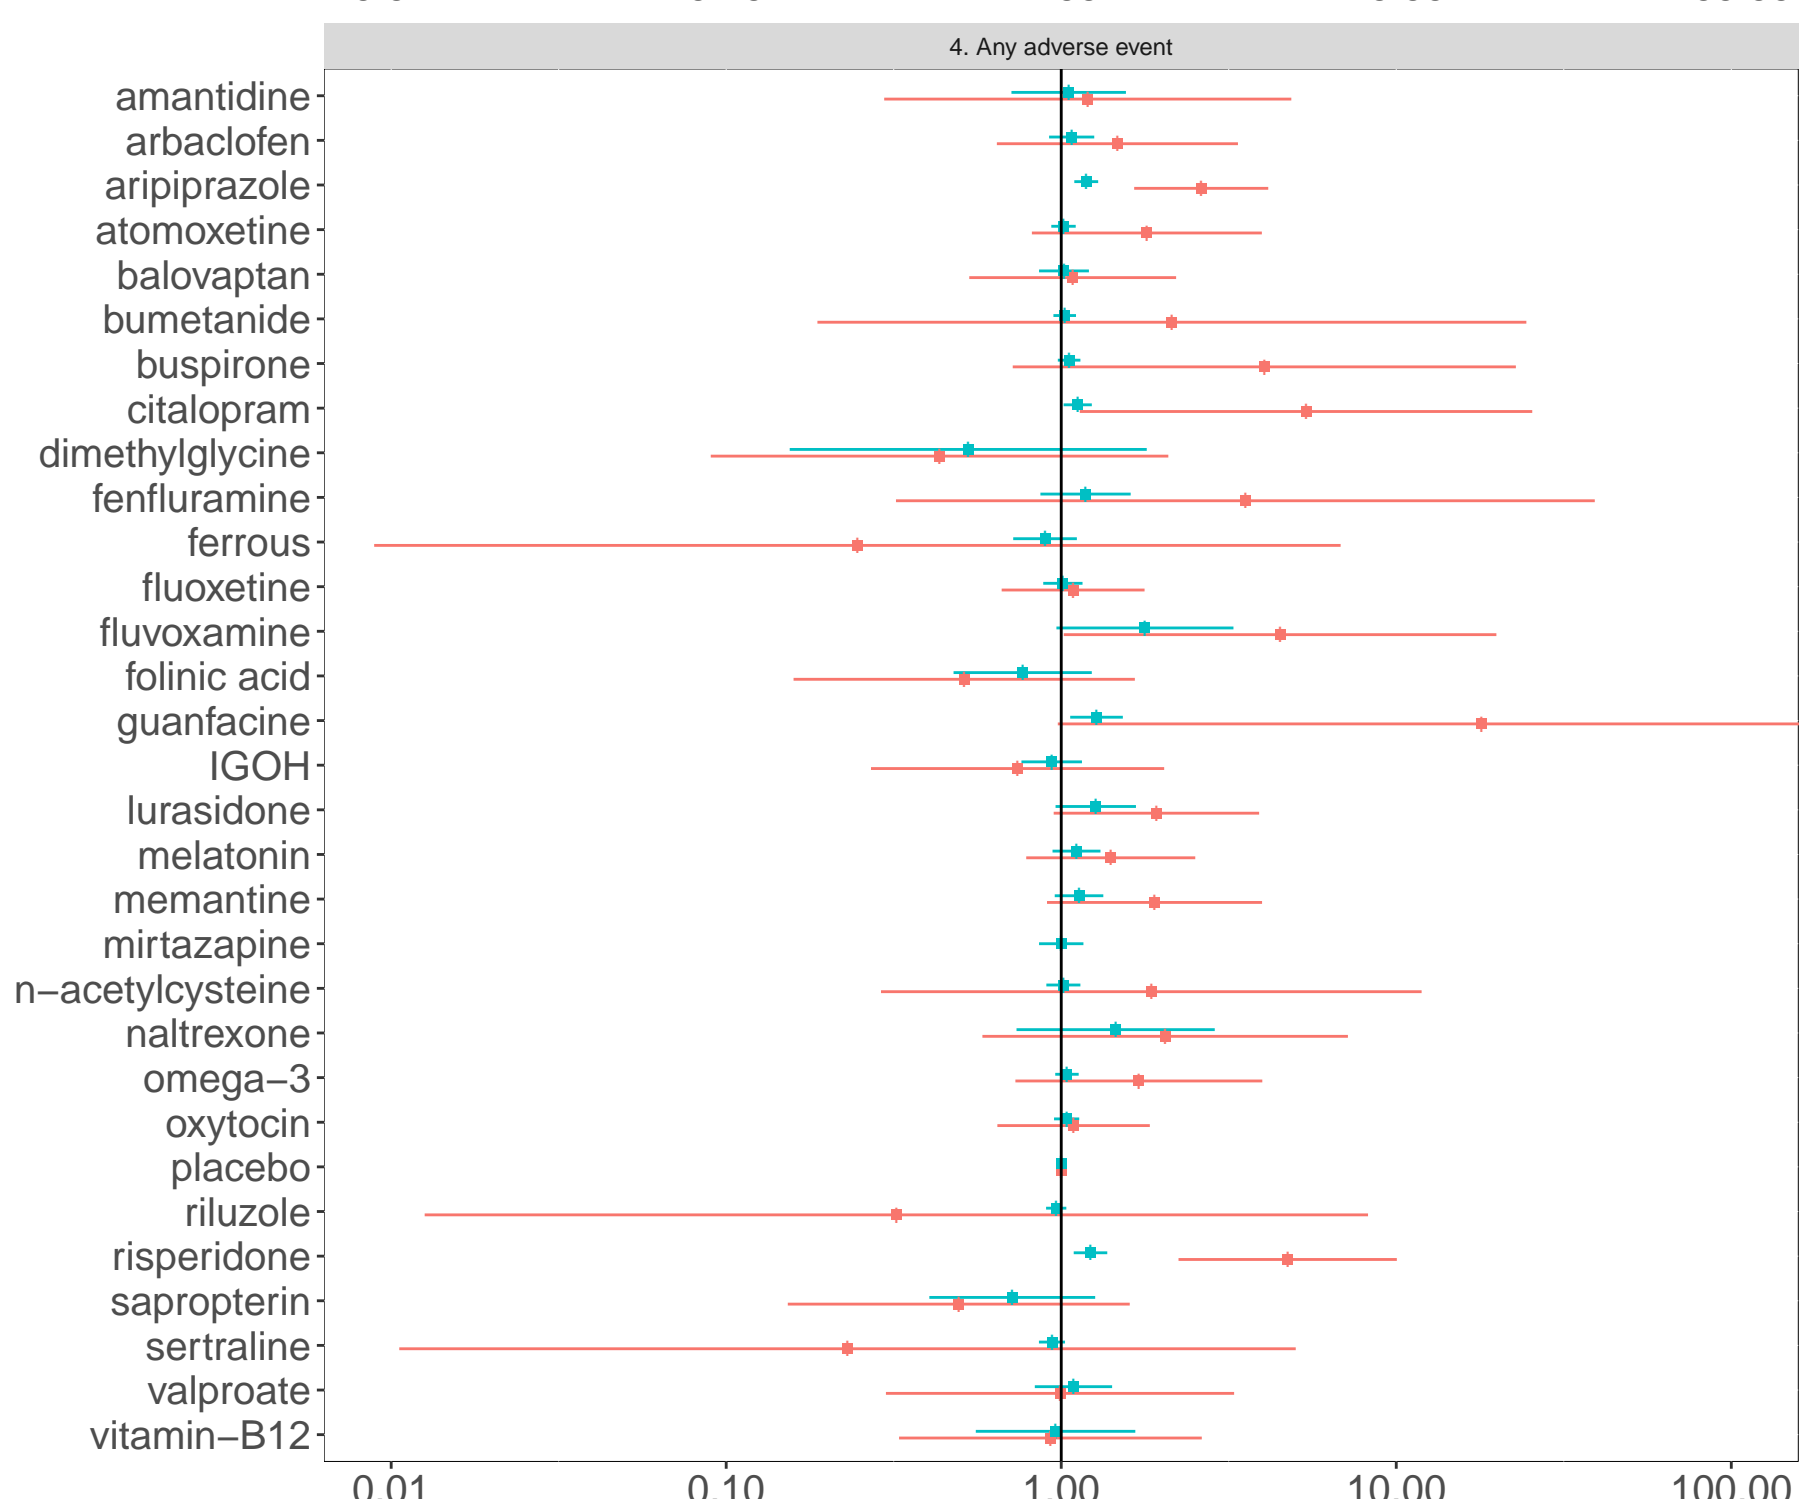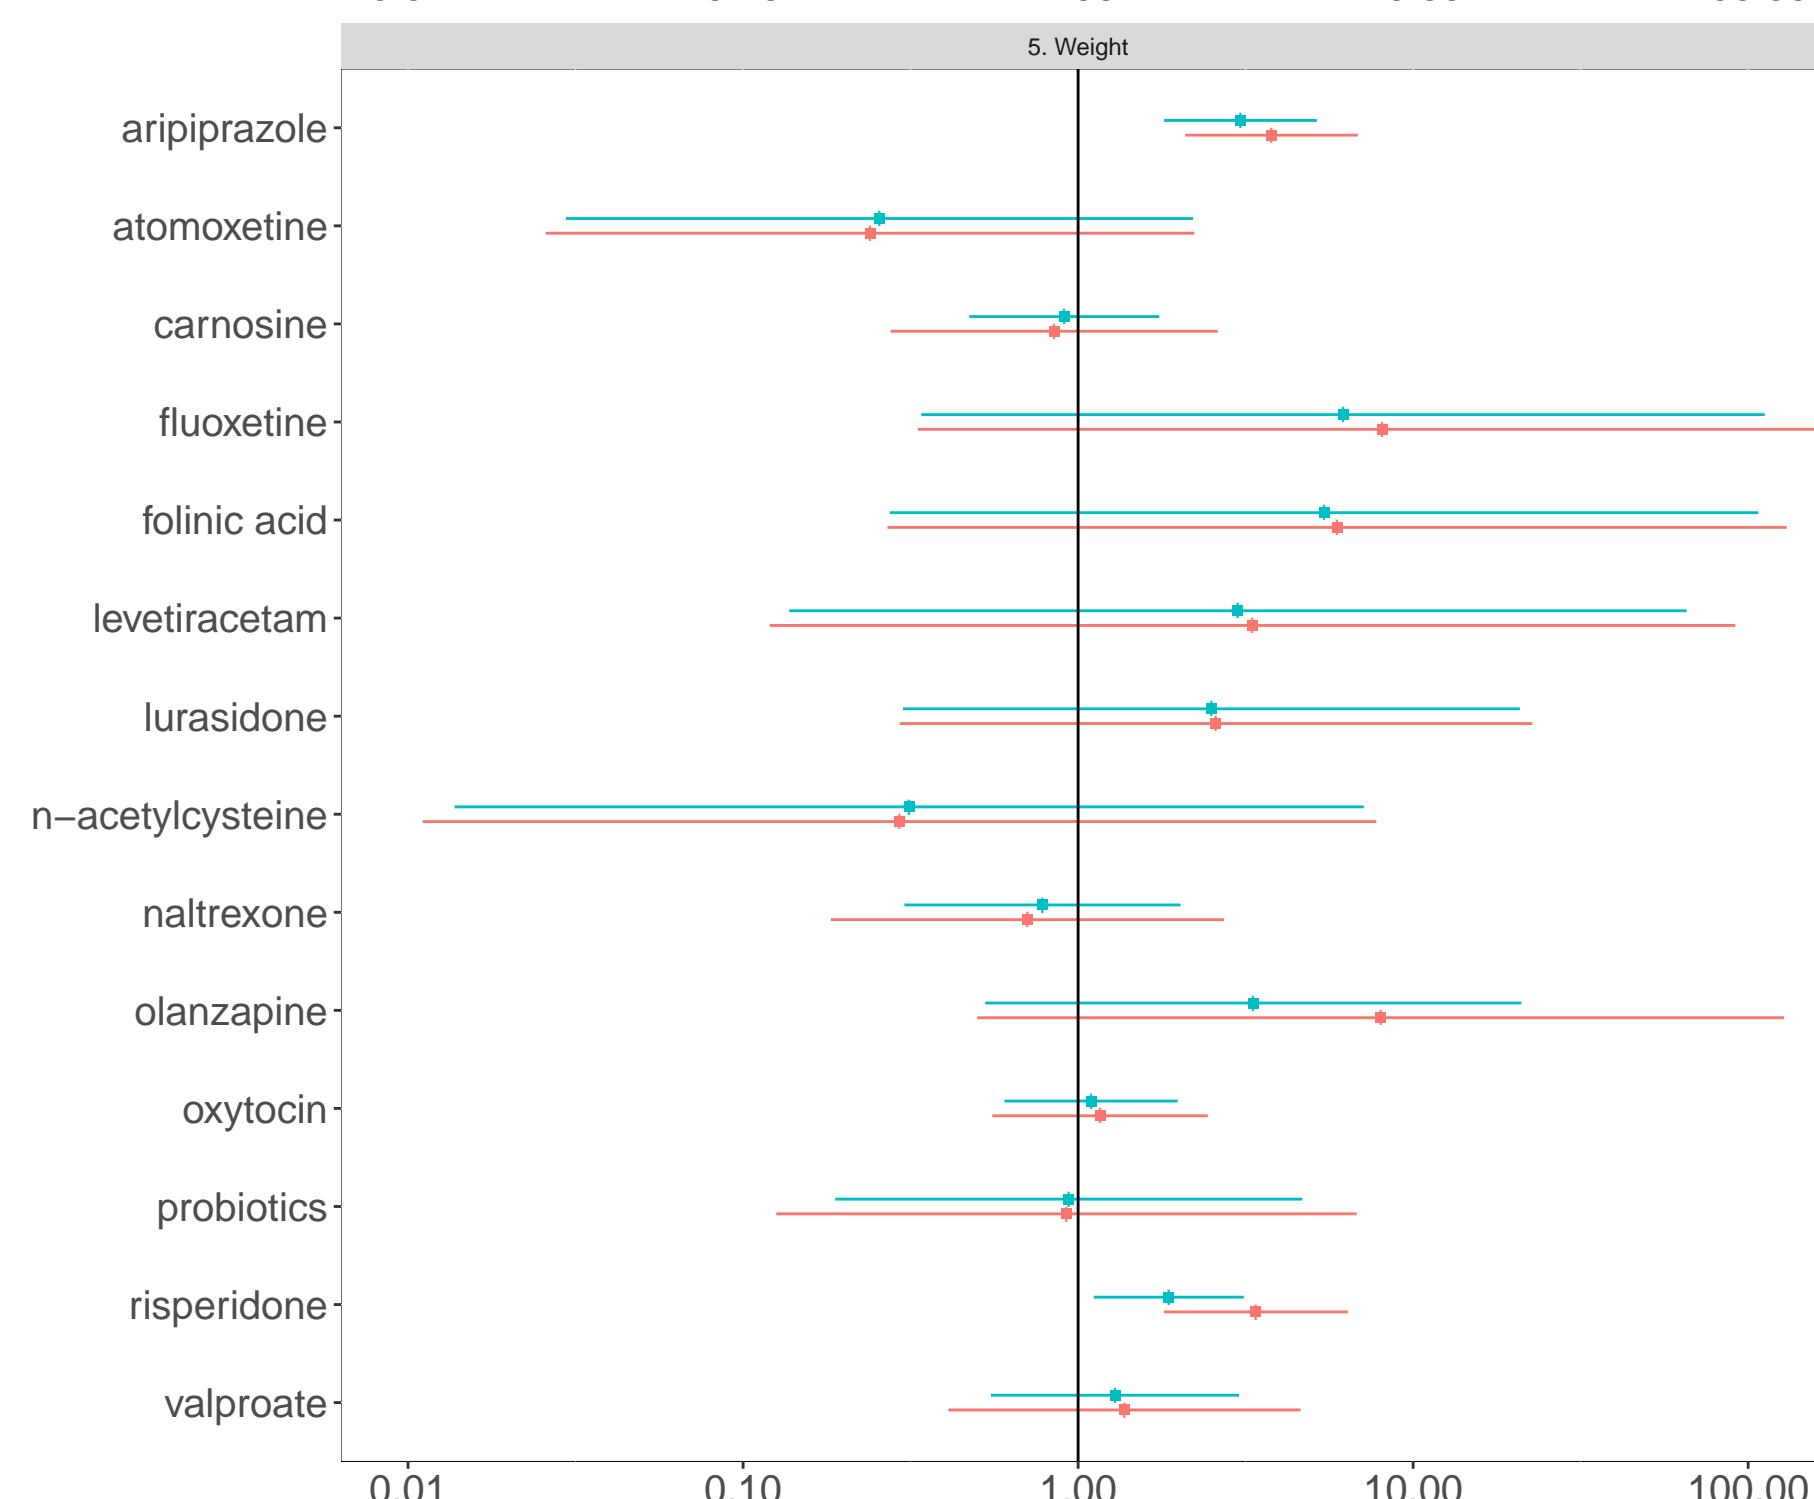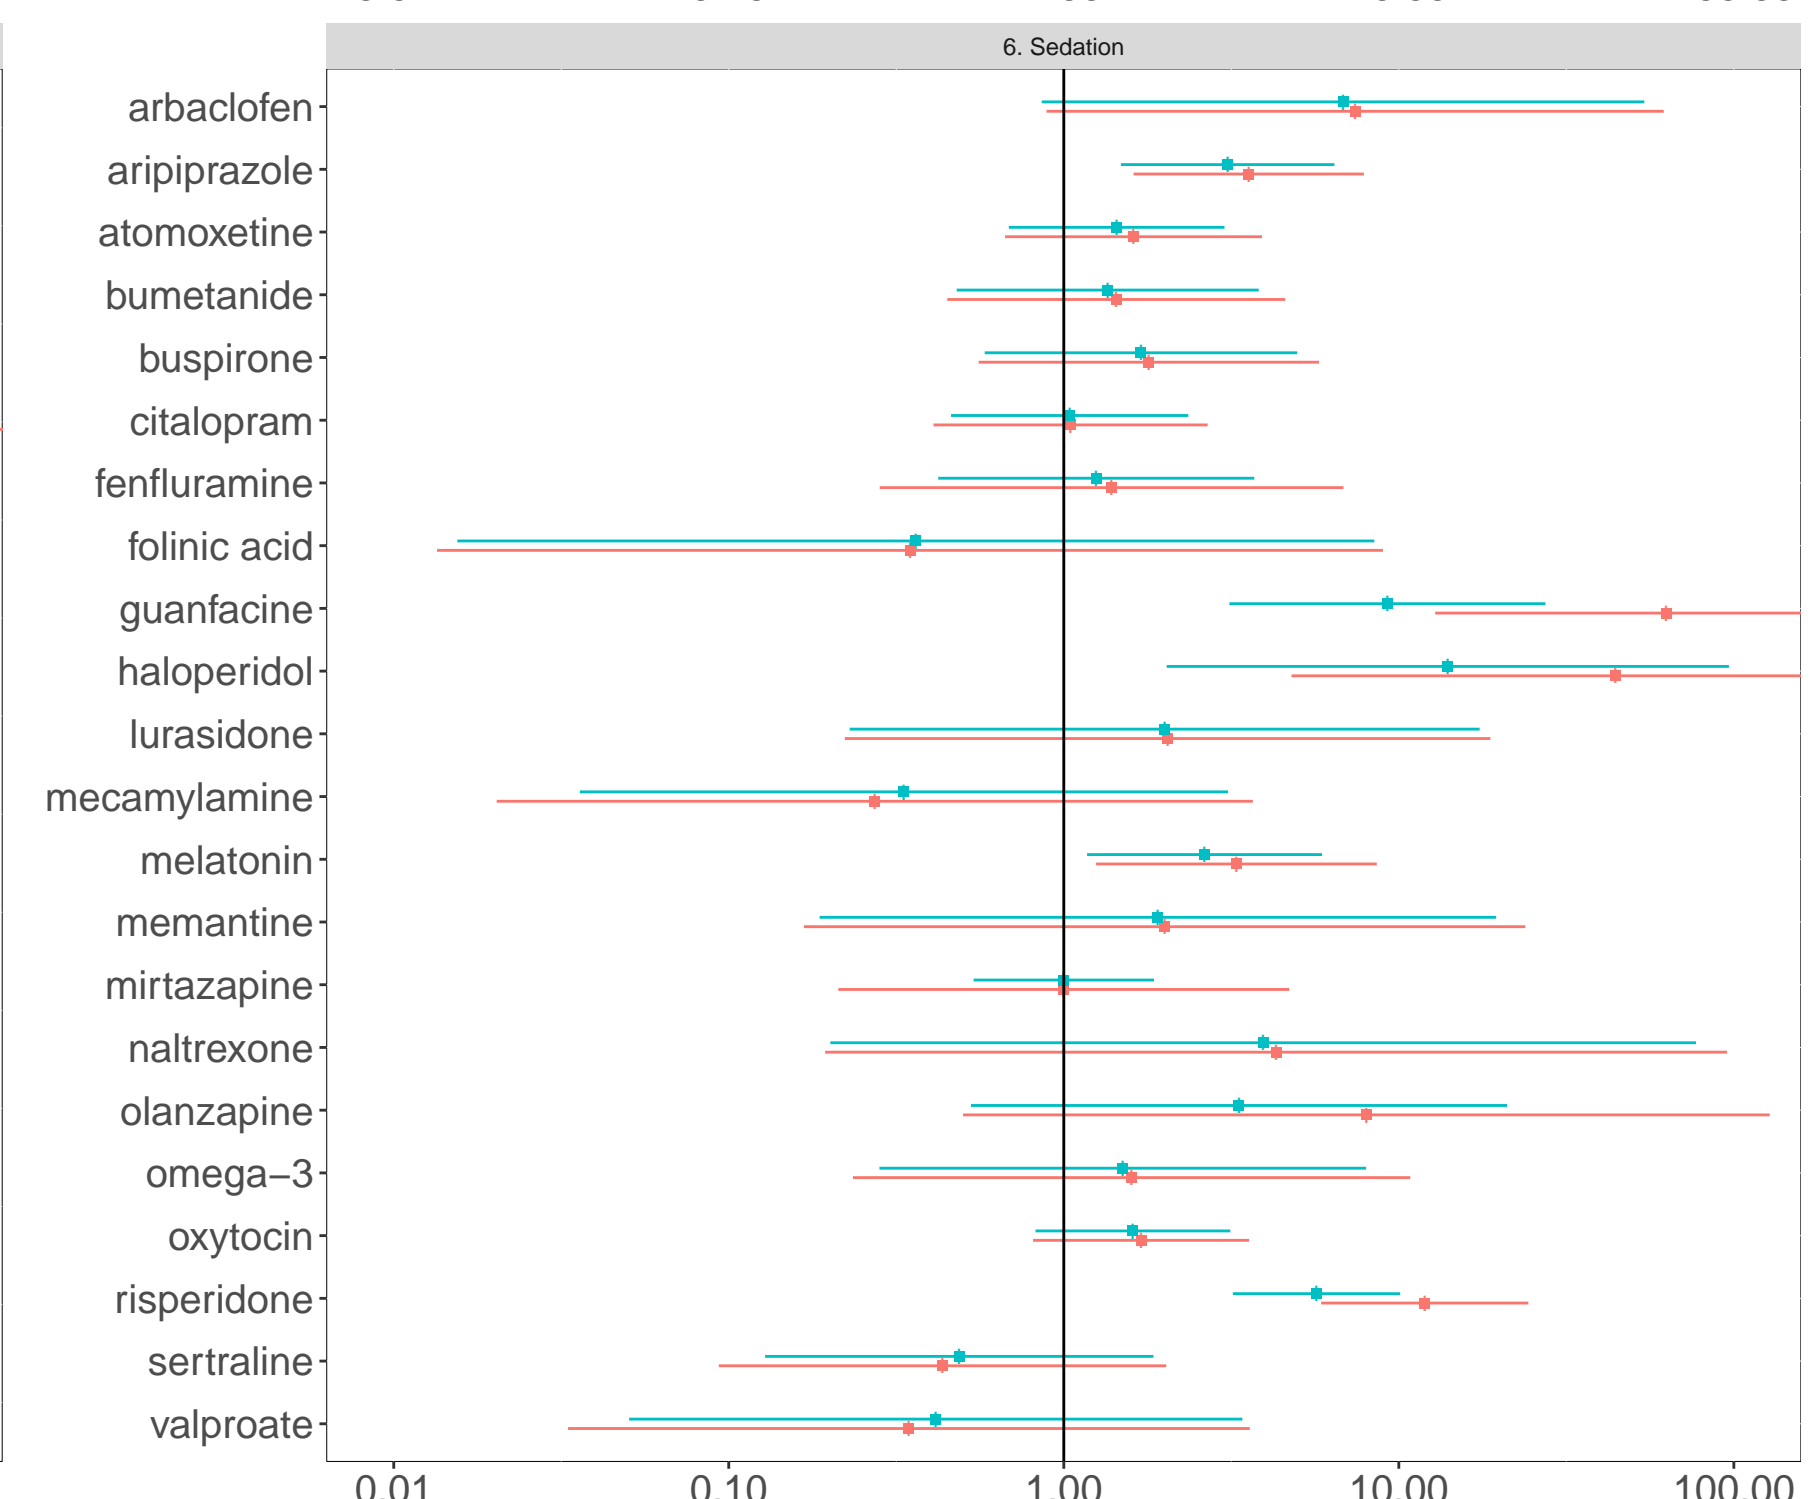

effect\_size  
OR  
RR

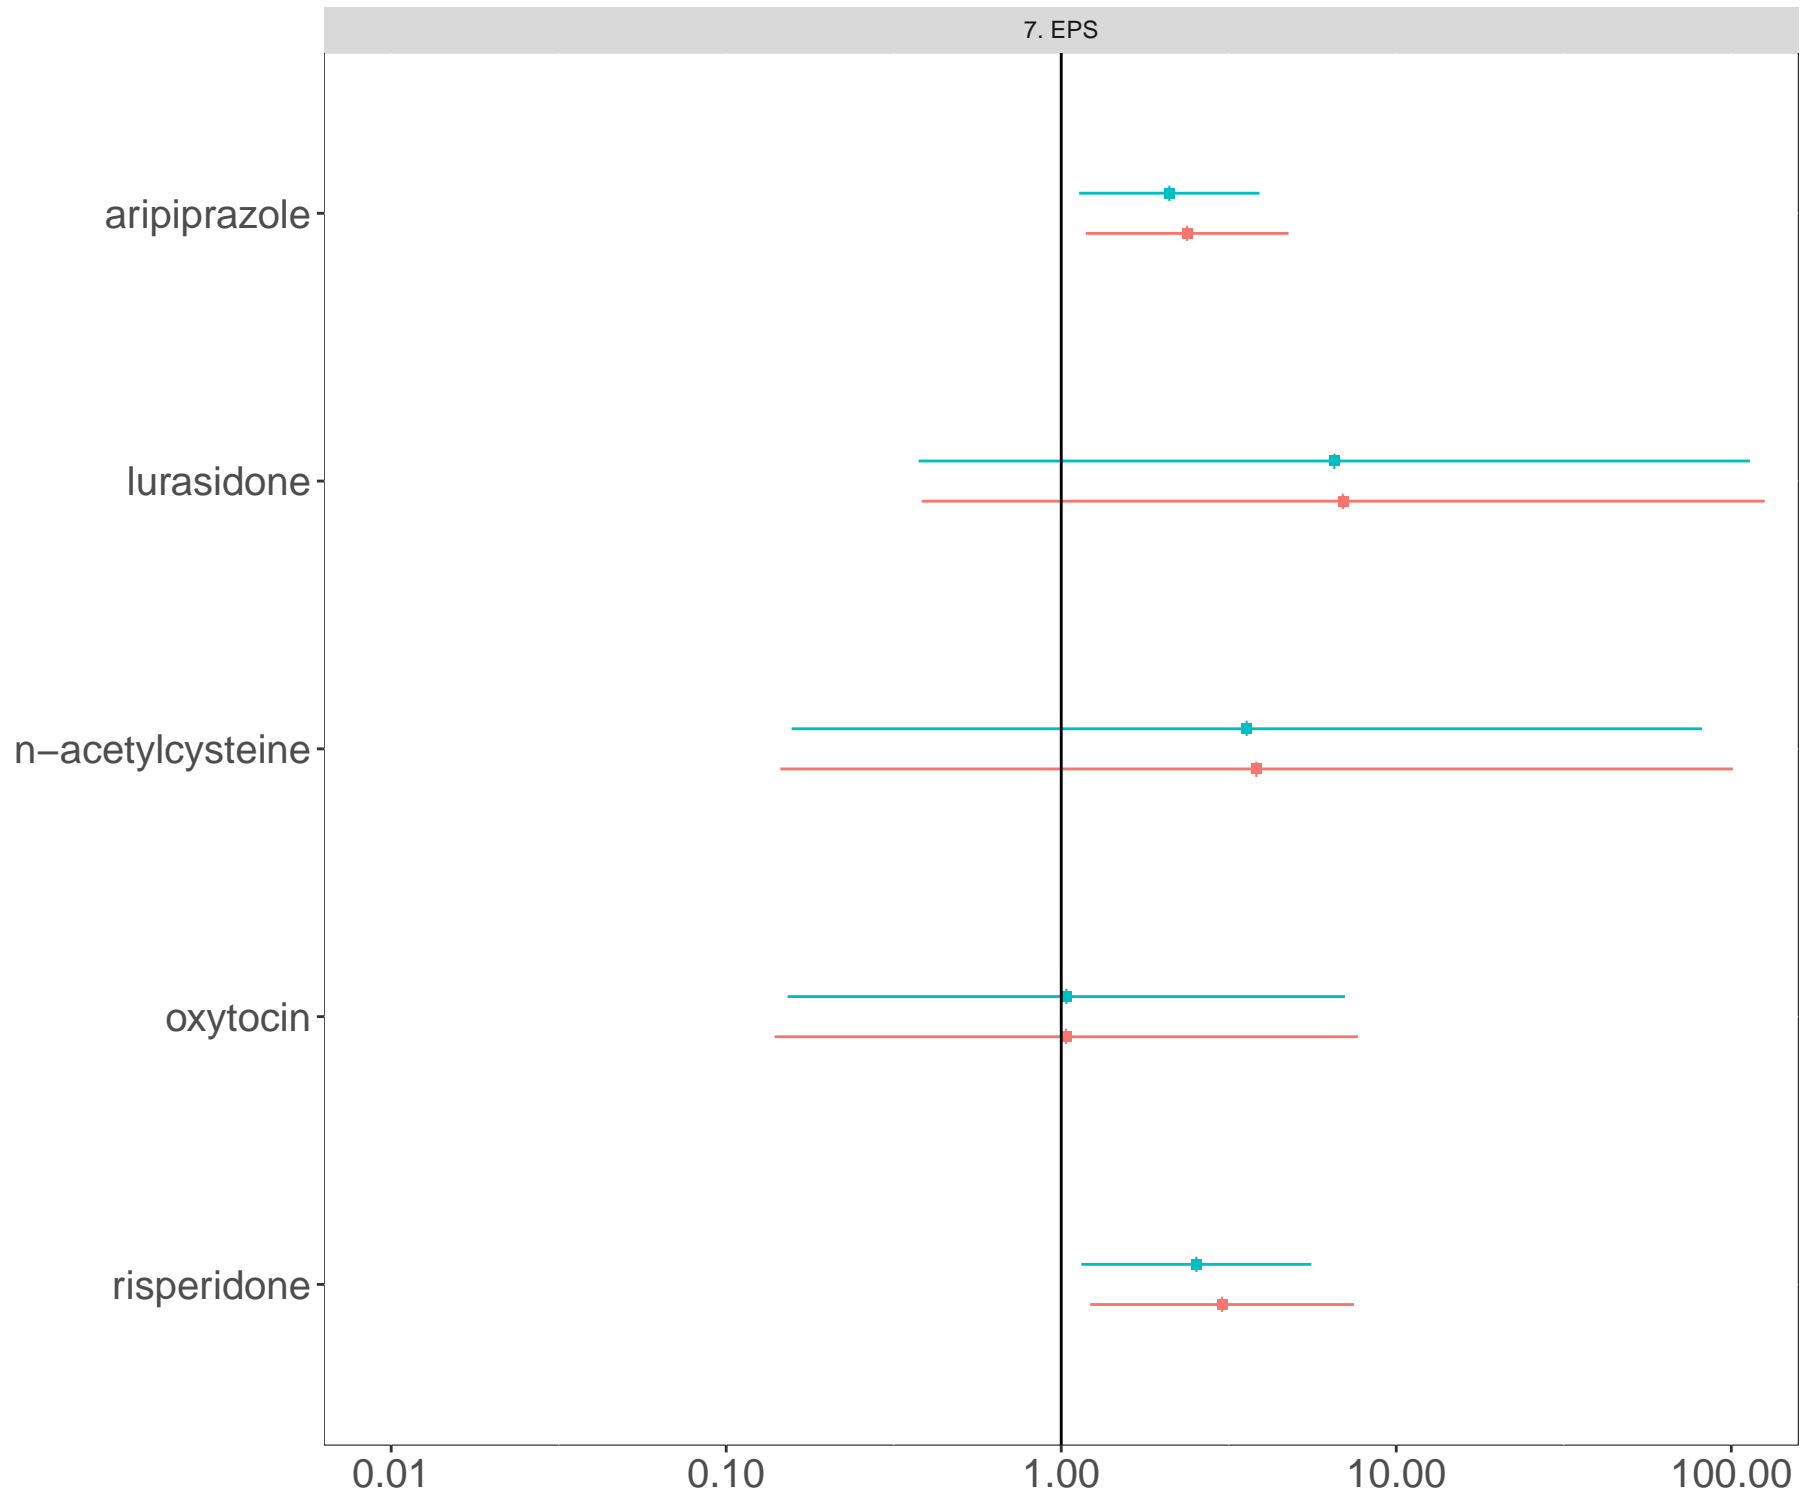

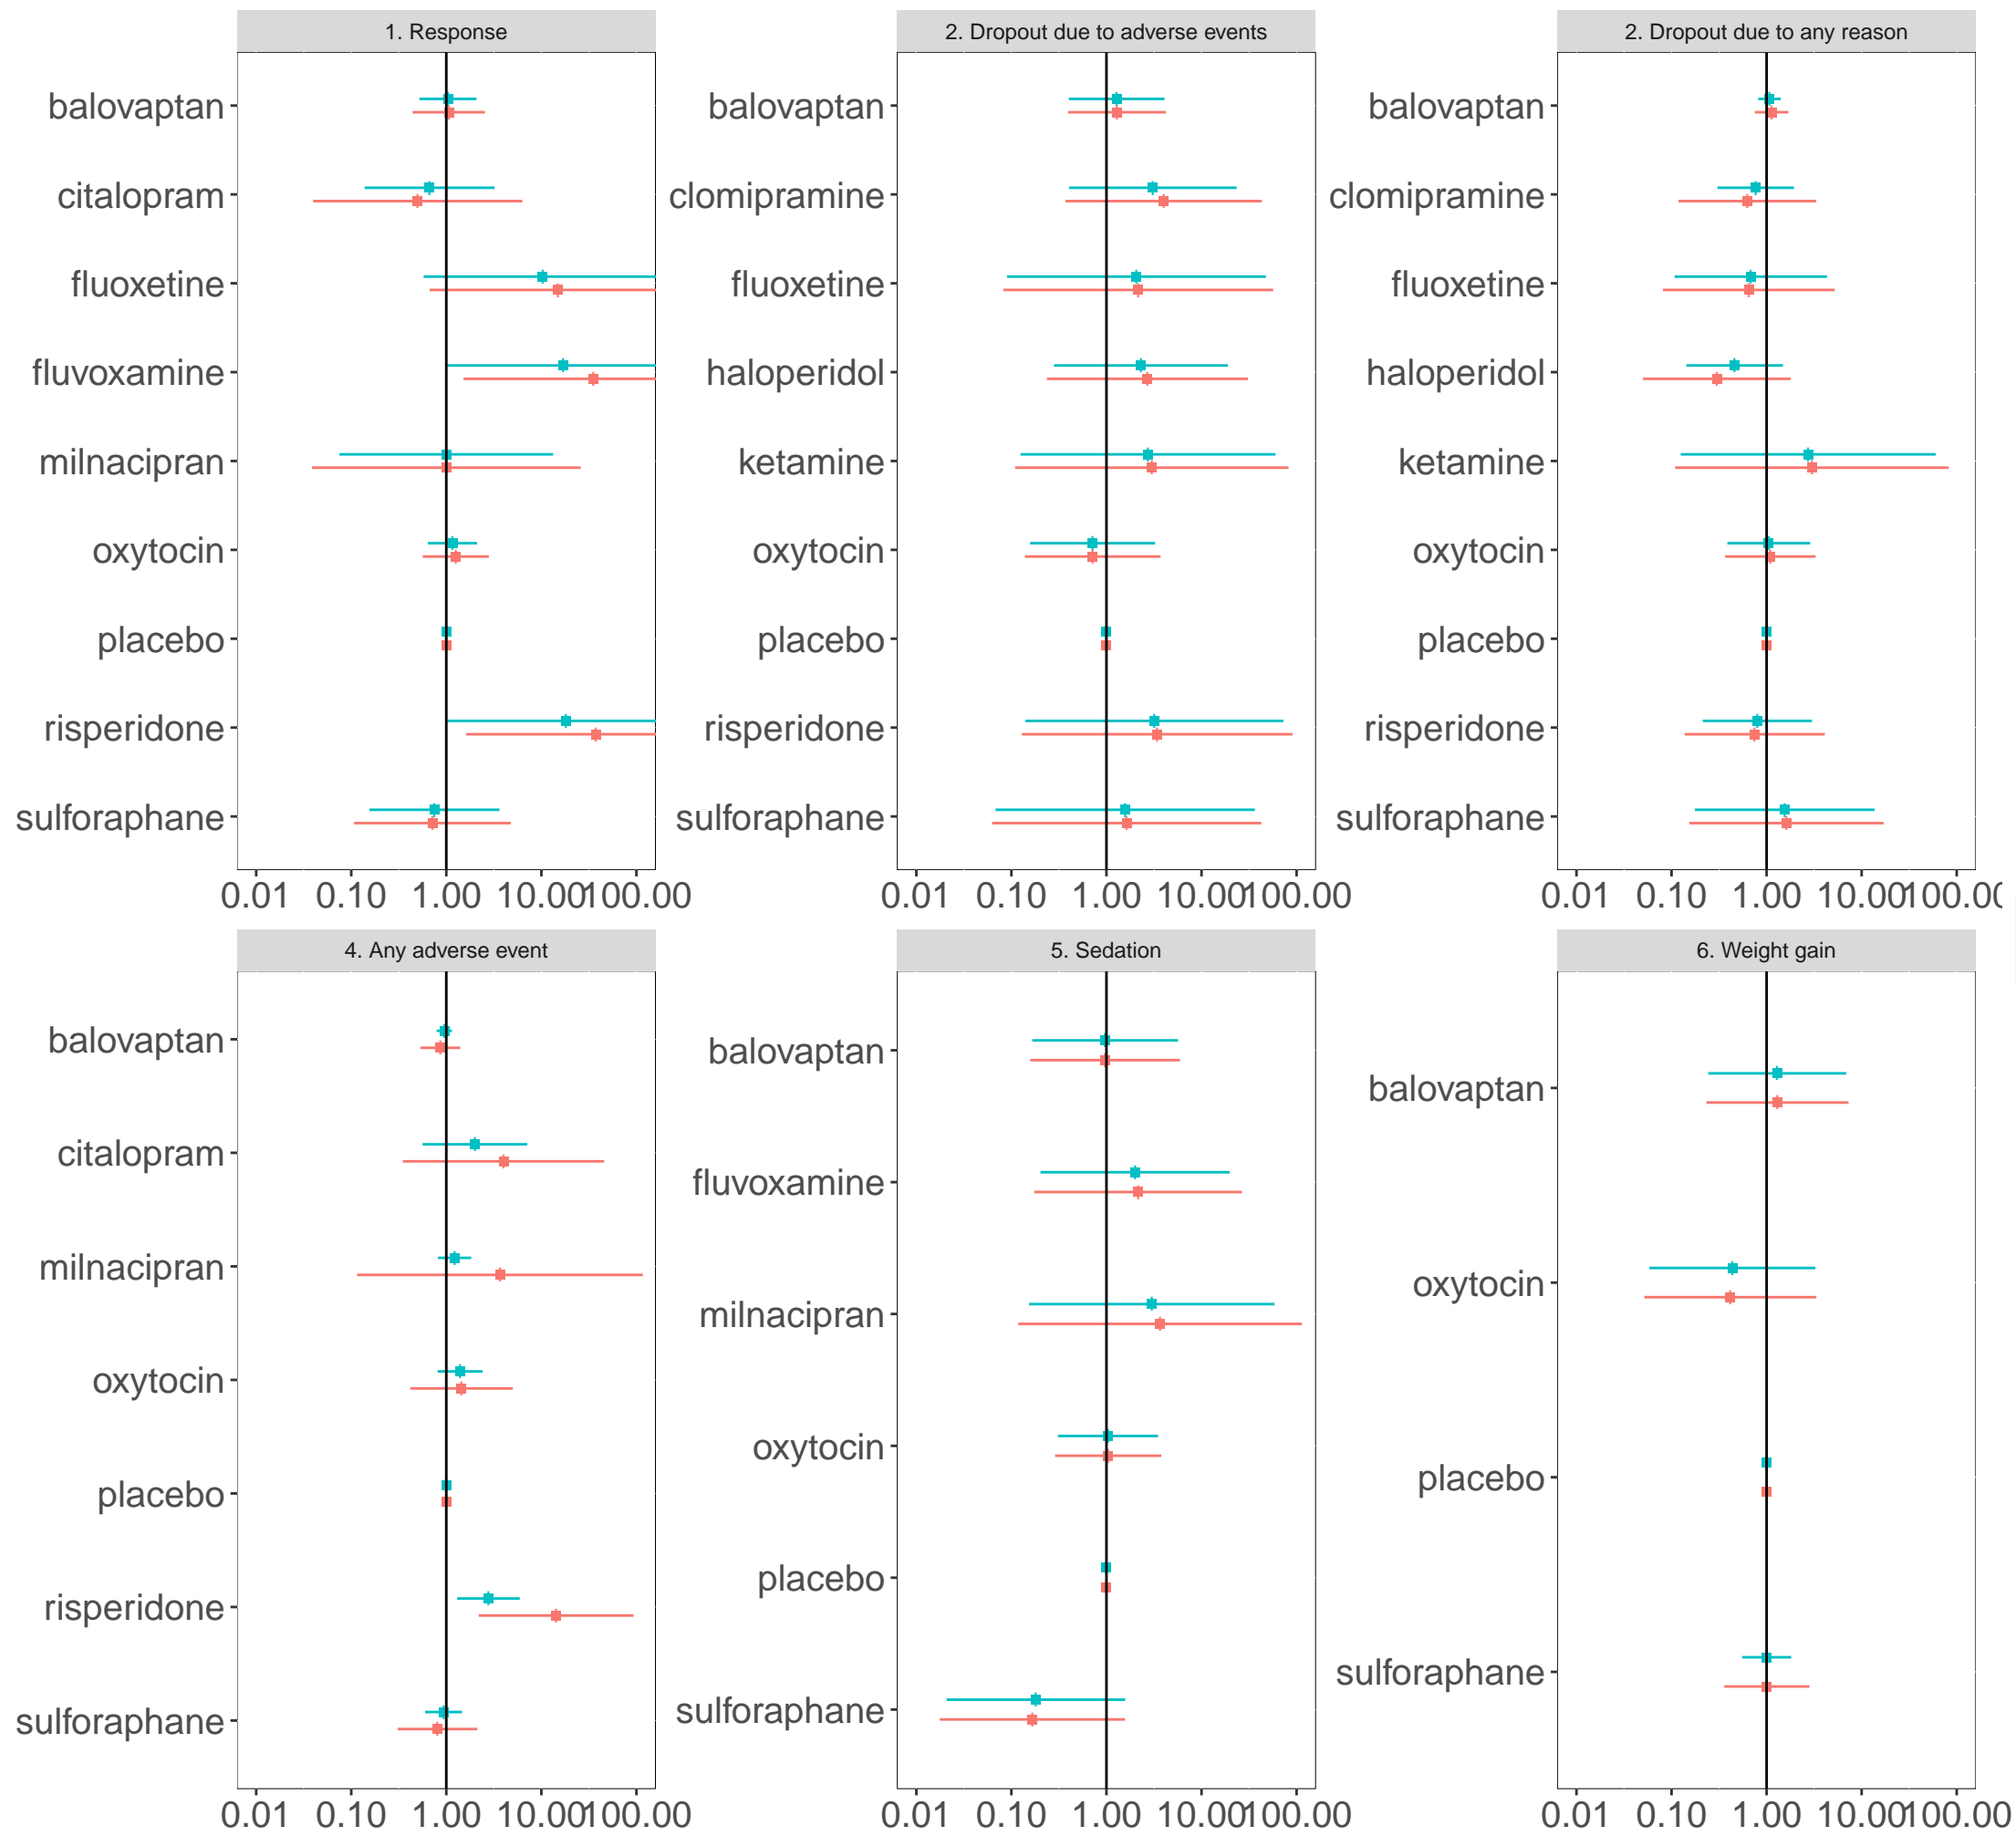

Supplement: MOESM6 [file 20193664]
