# Supplementary material for: Pharmacological and dietary-supplement treatments for autism spectrum disorder: a systematic review and network meta-analysis
Source: PubMed Central journal article supplement (PMC8896153; doi:10.1186/s13229-022-00488-4), 2022-03-04
Supplement: 13229_2022_488_MOESM3_ESM.pdf [file 13229_2022_488_MOESM3_ESM.pdf]

# Irritability

## Children/adolescents\*

## Adults

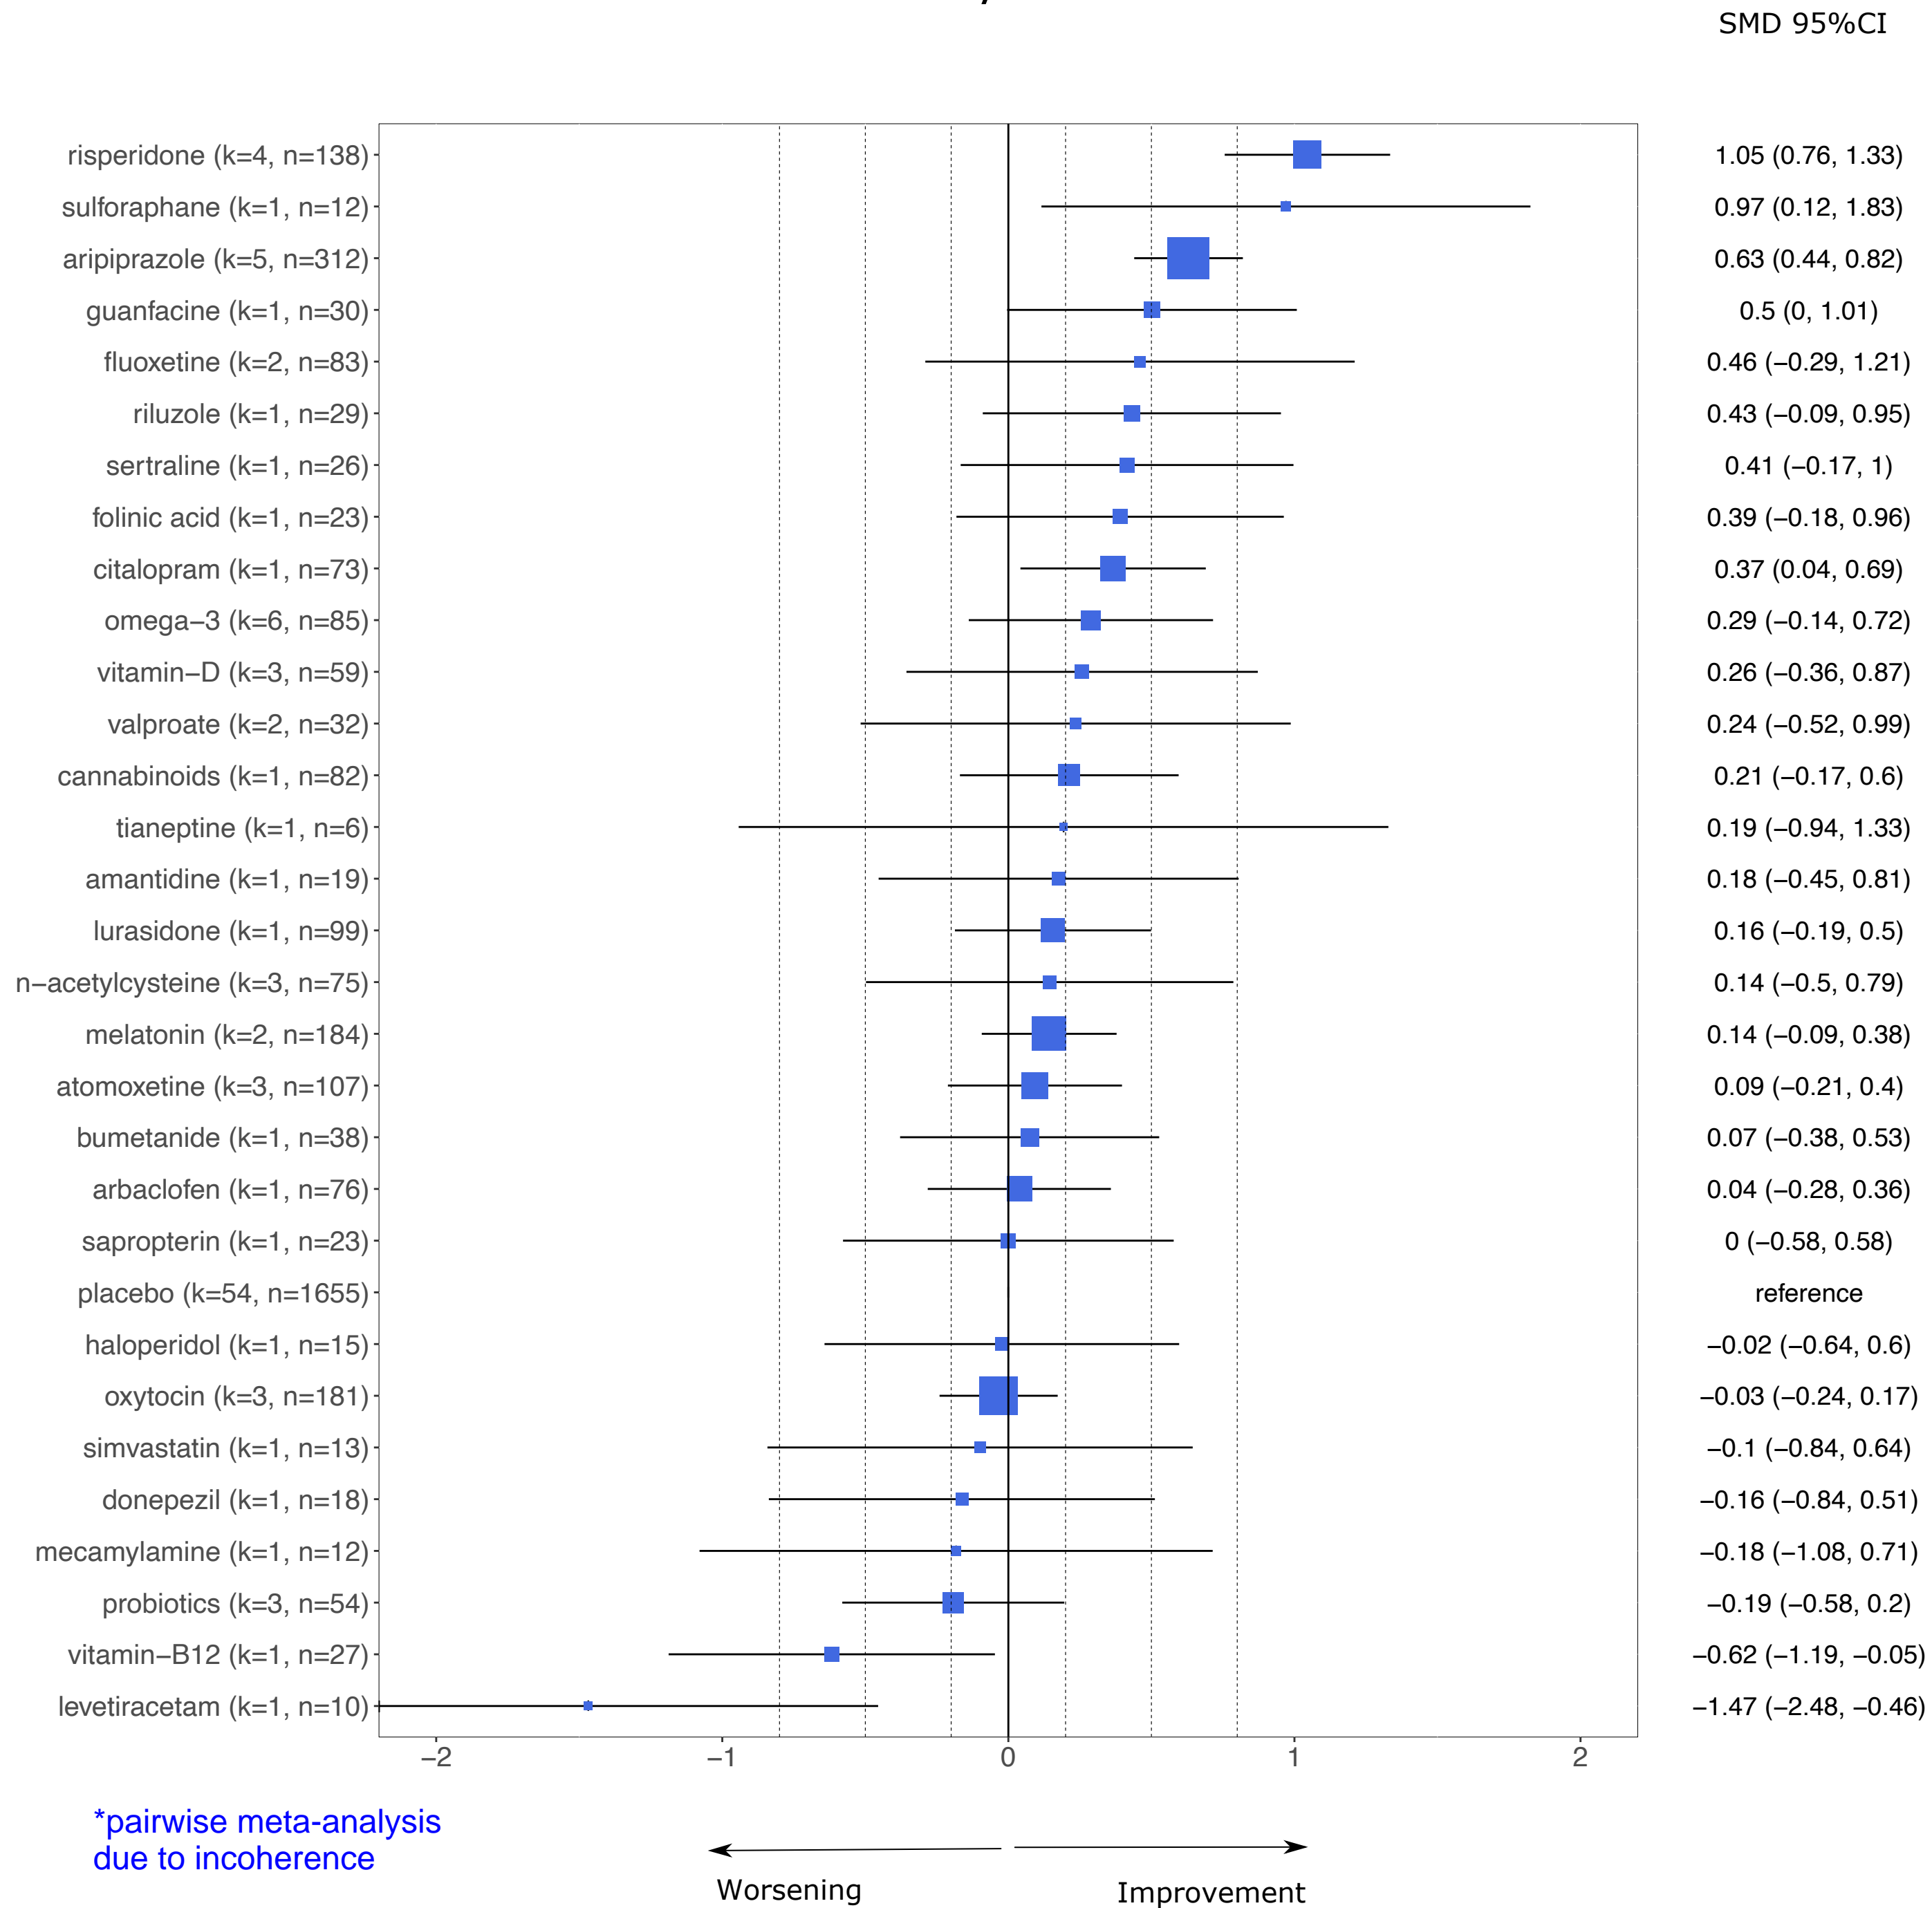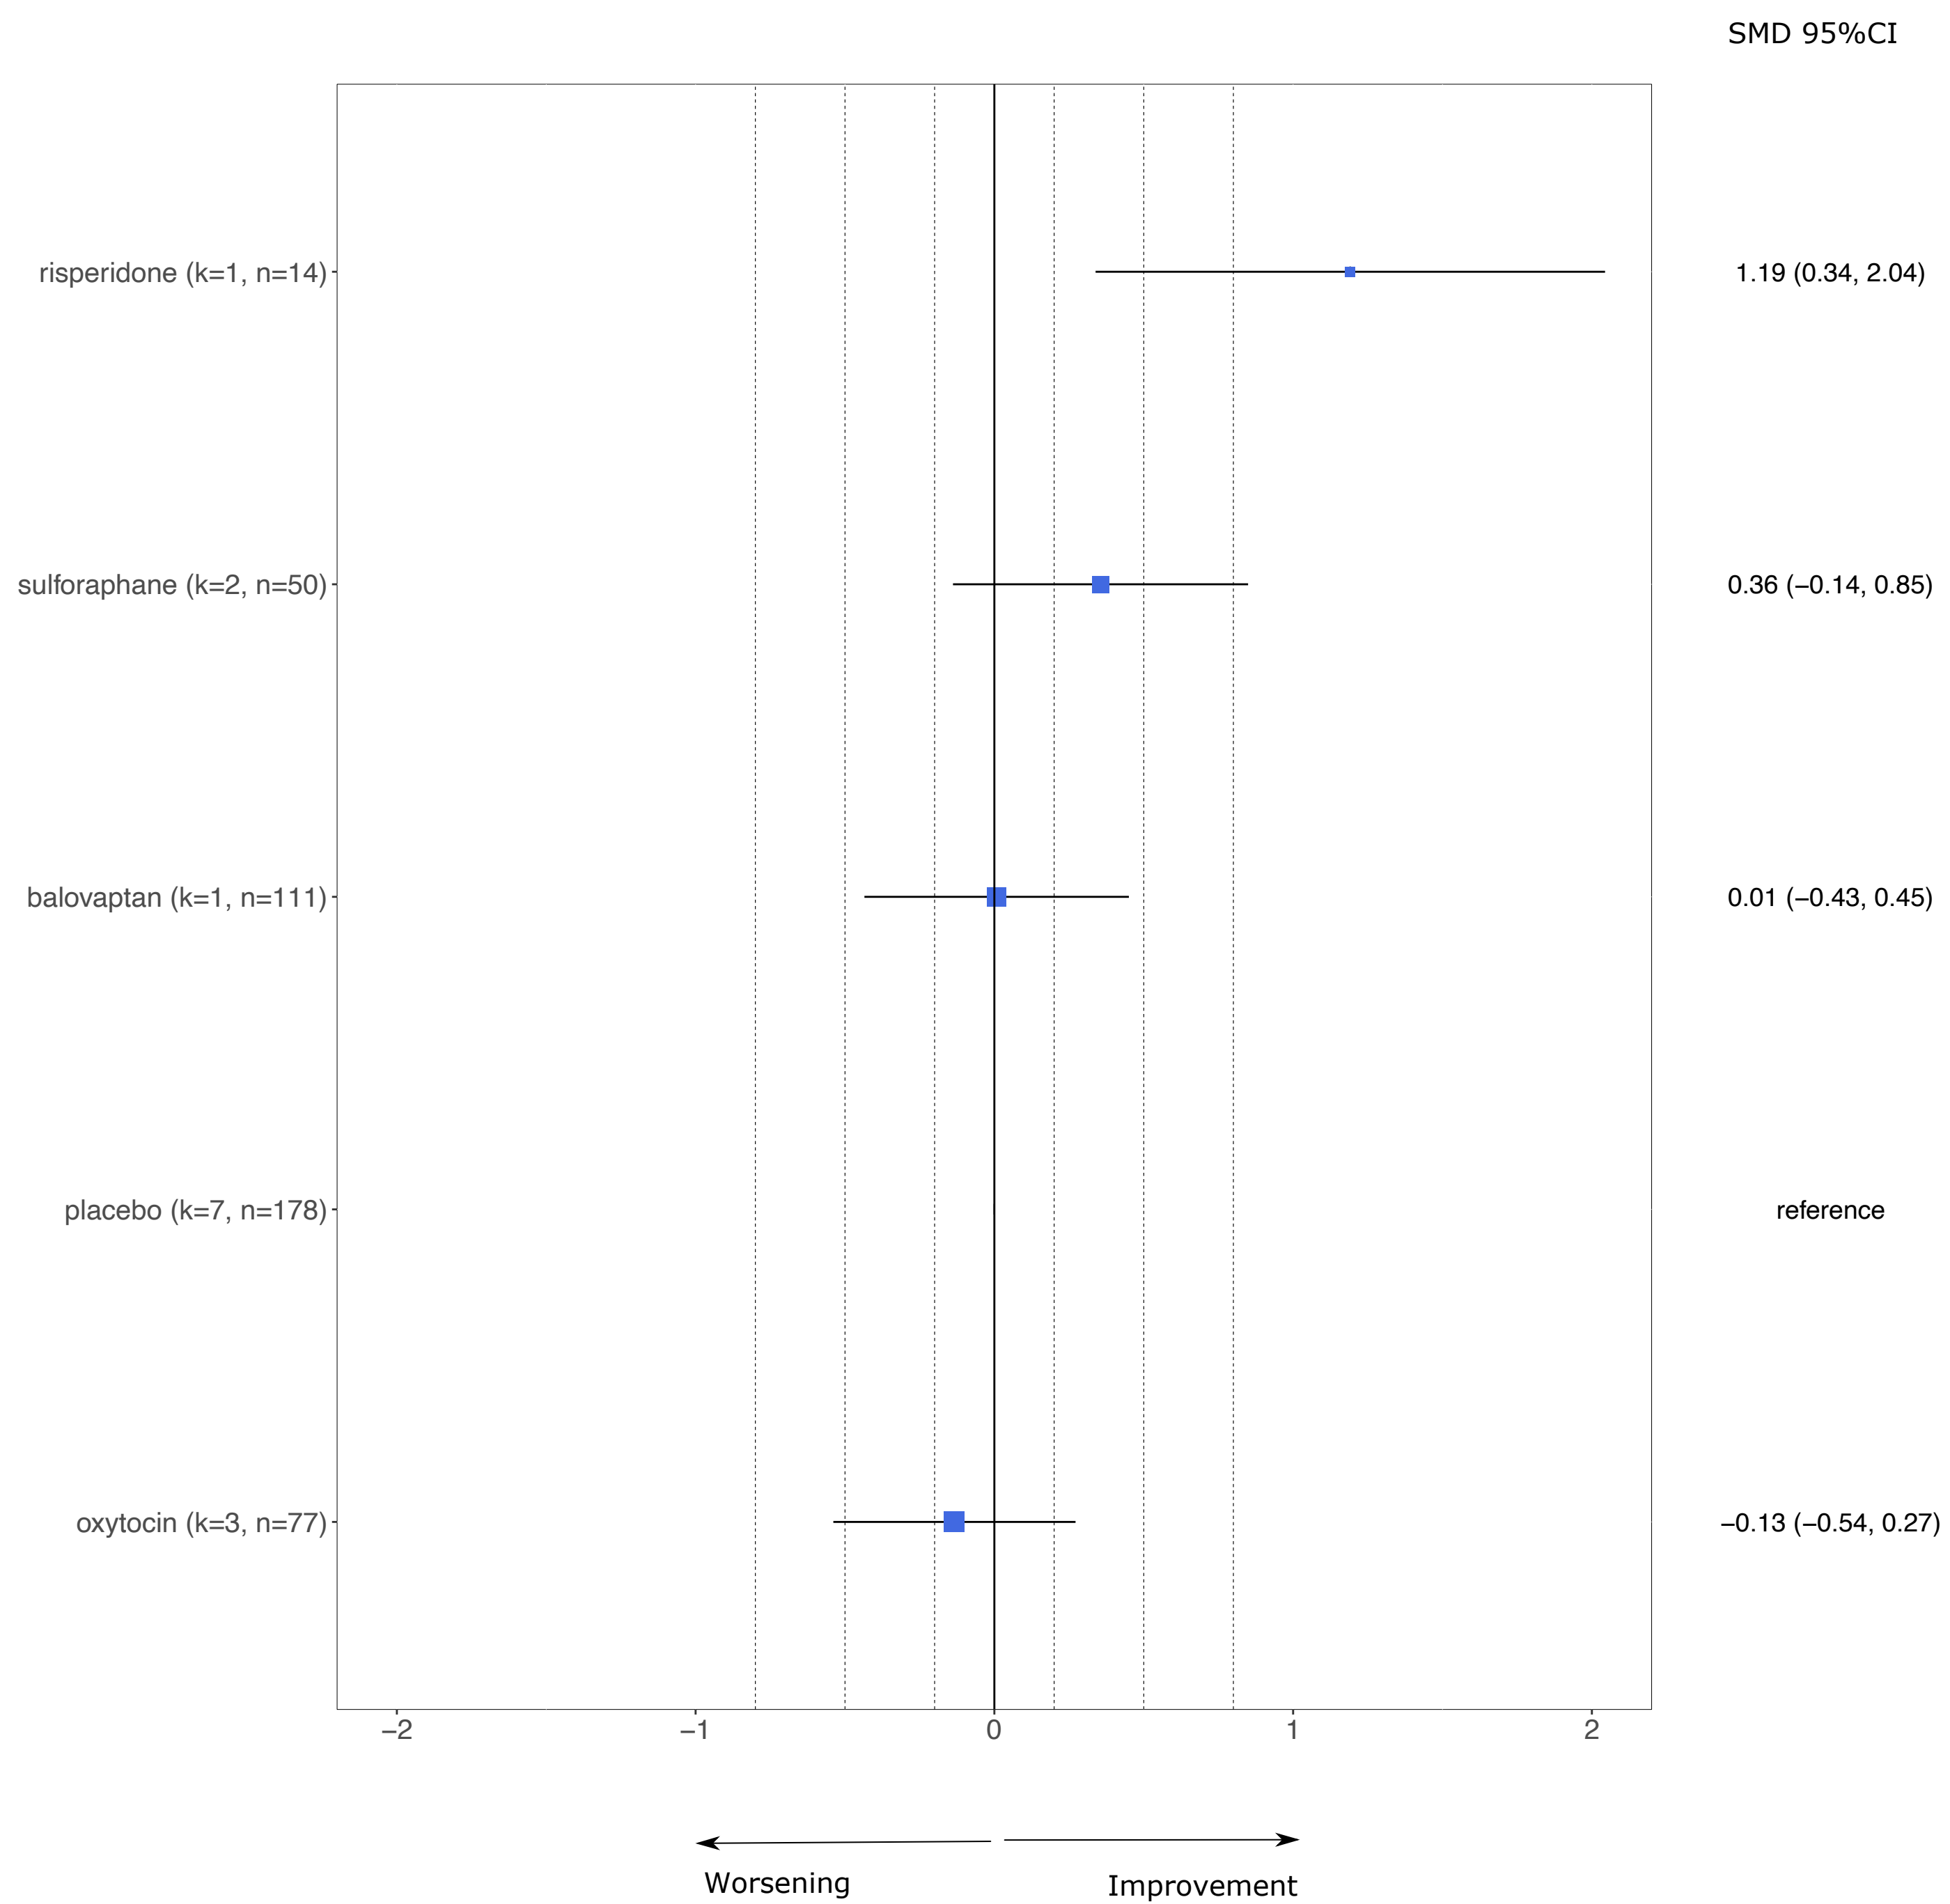

# ADHD symptoms

## Children/adolescents

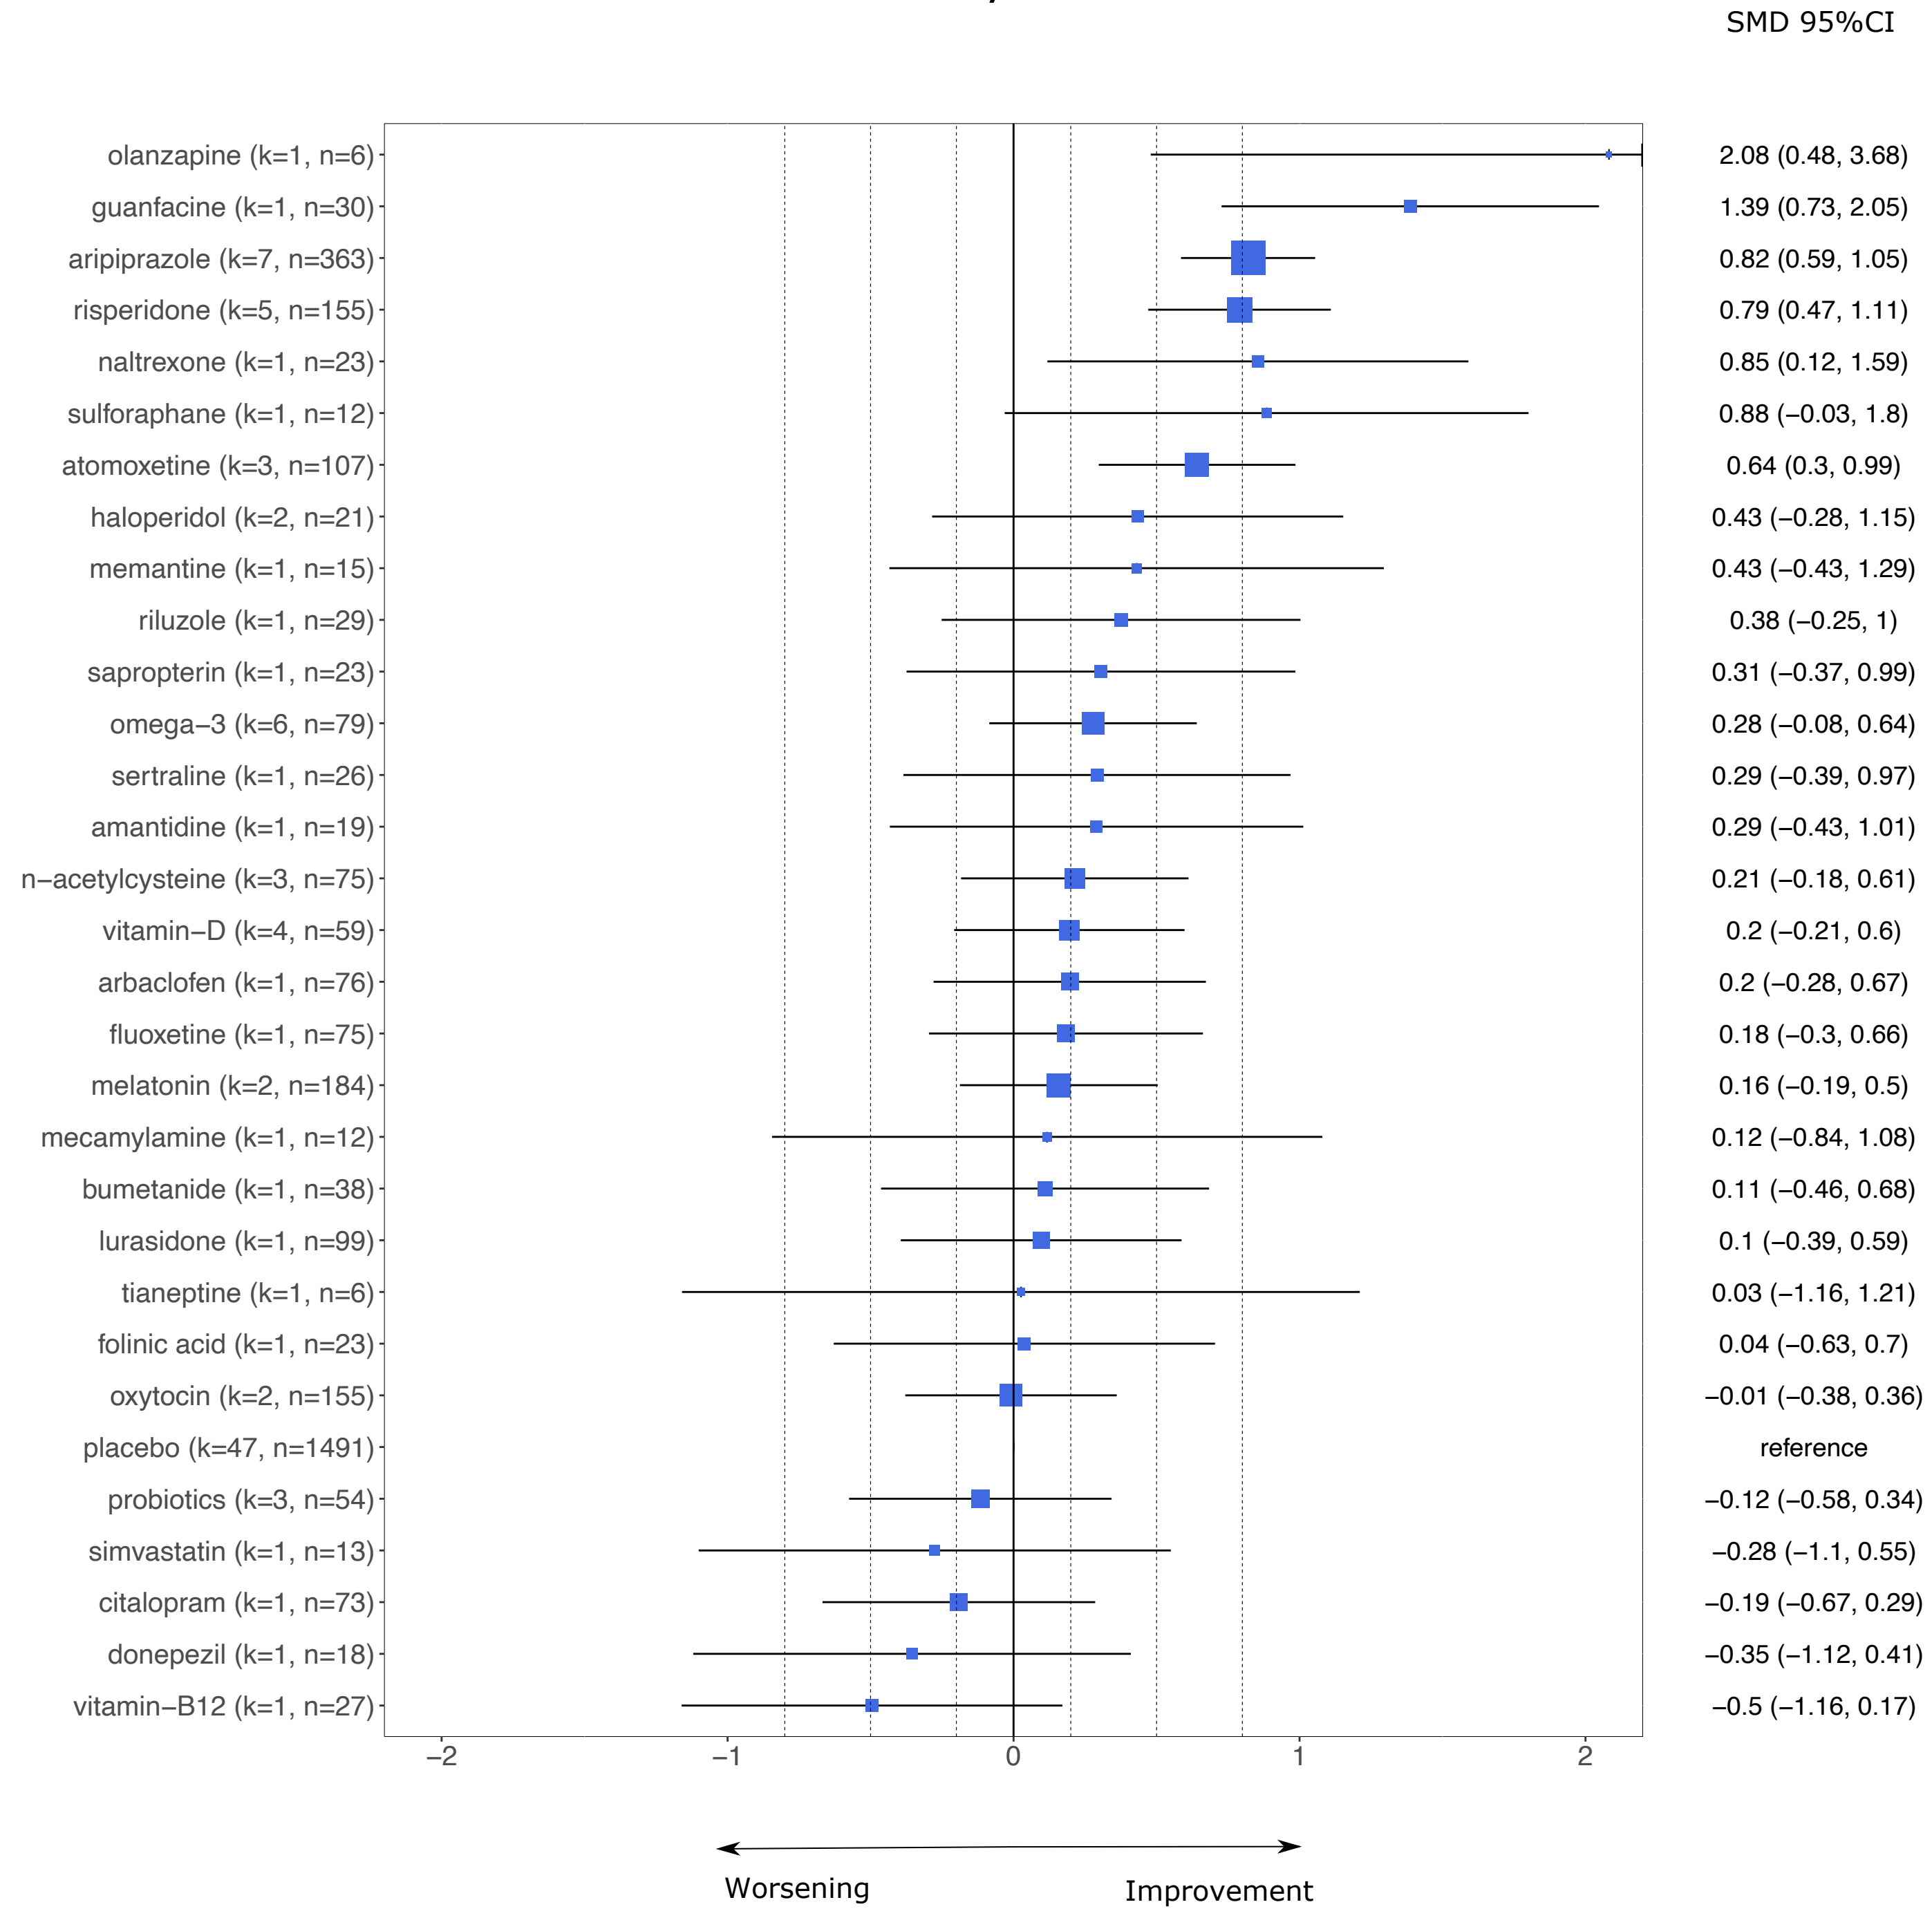

## Adults

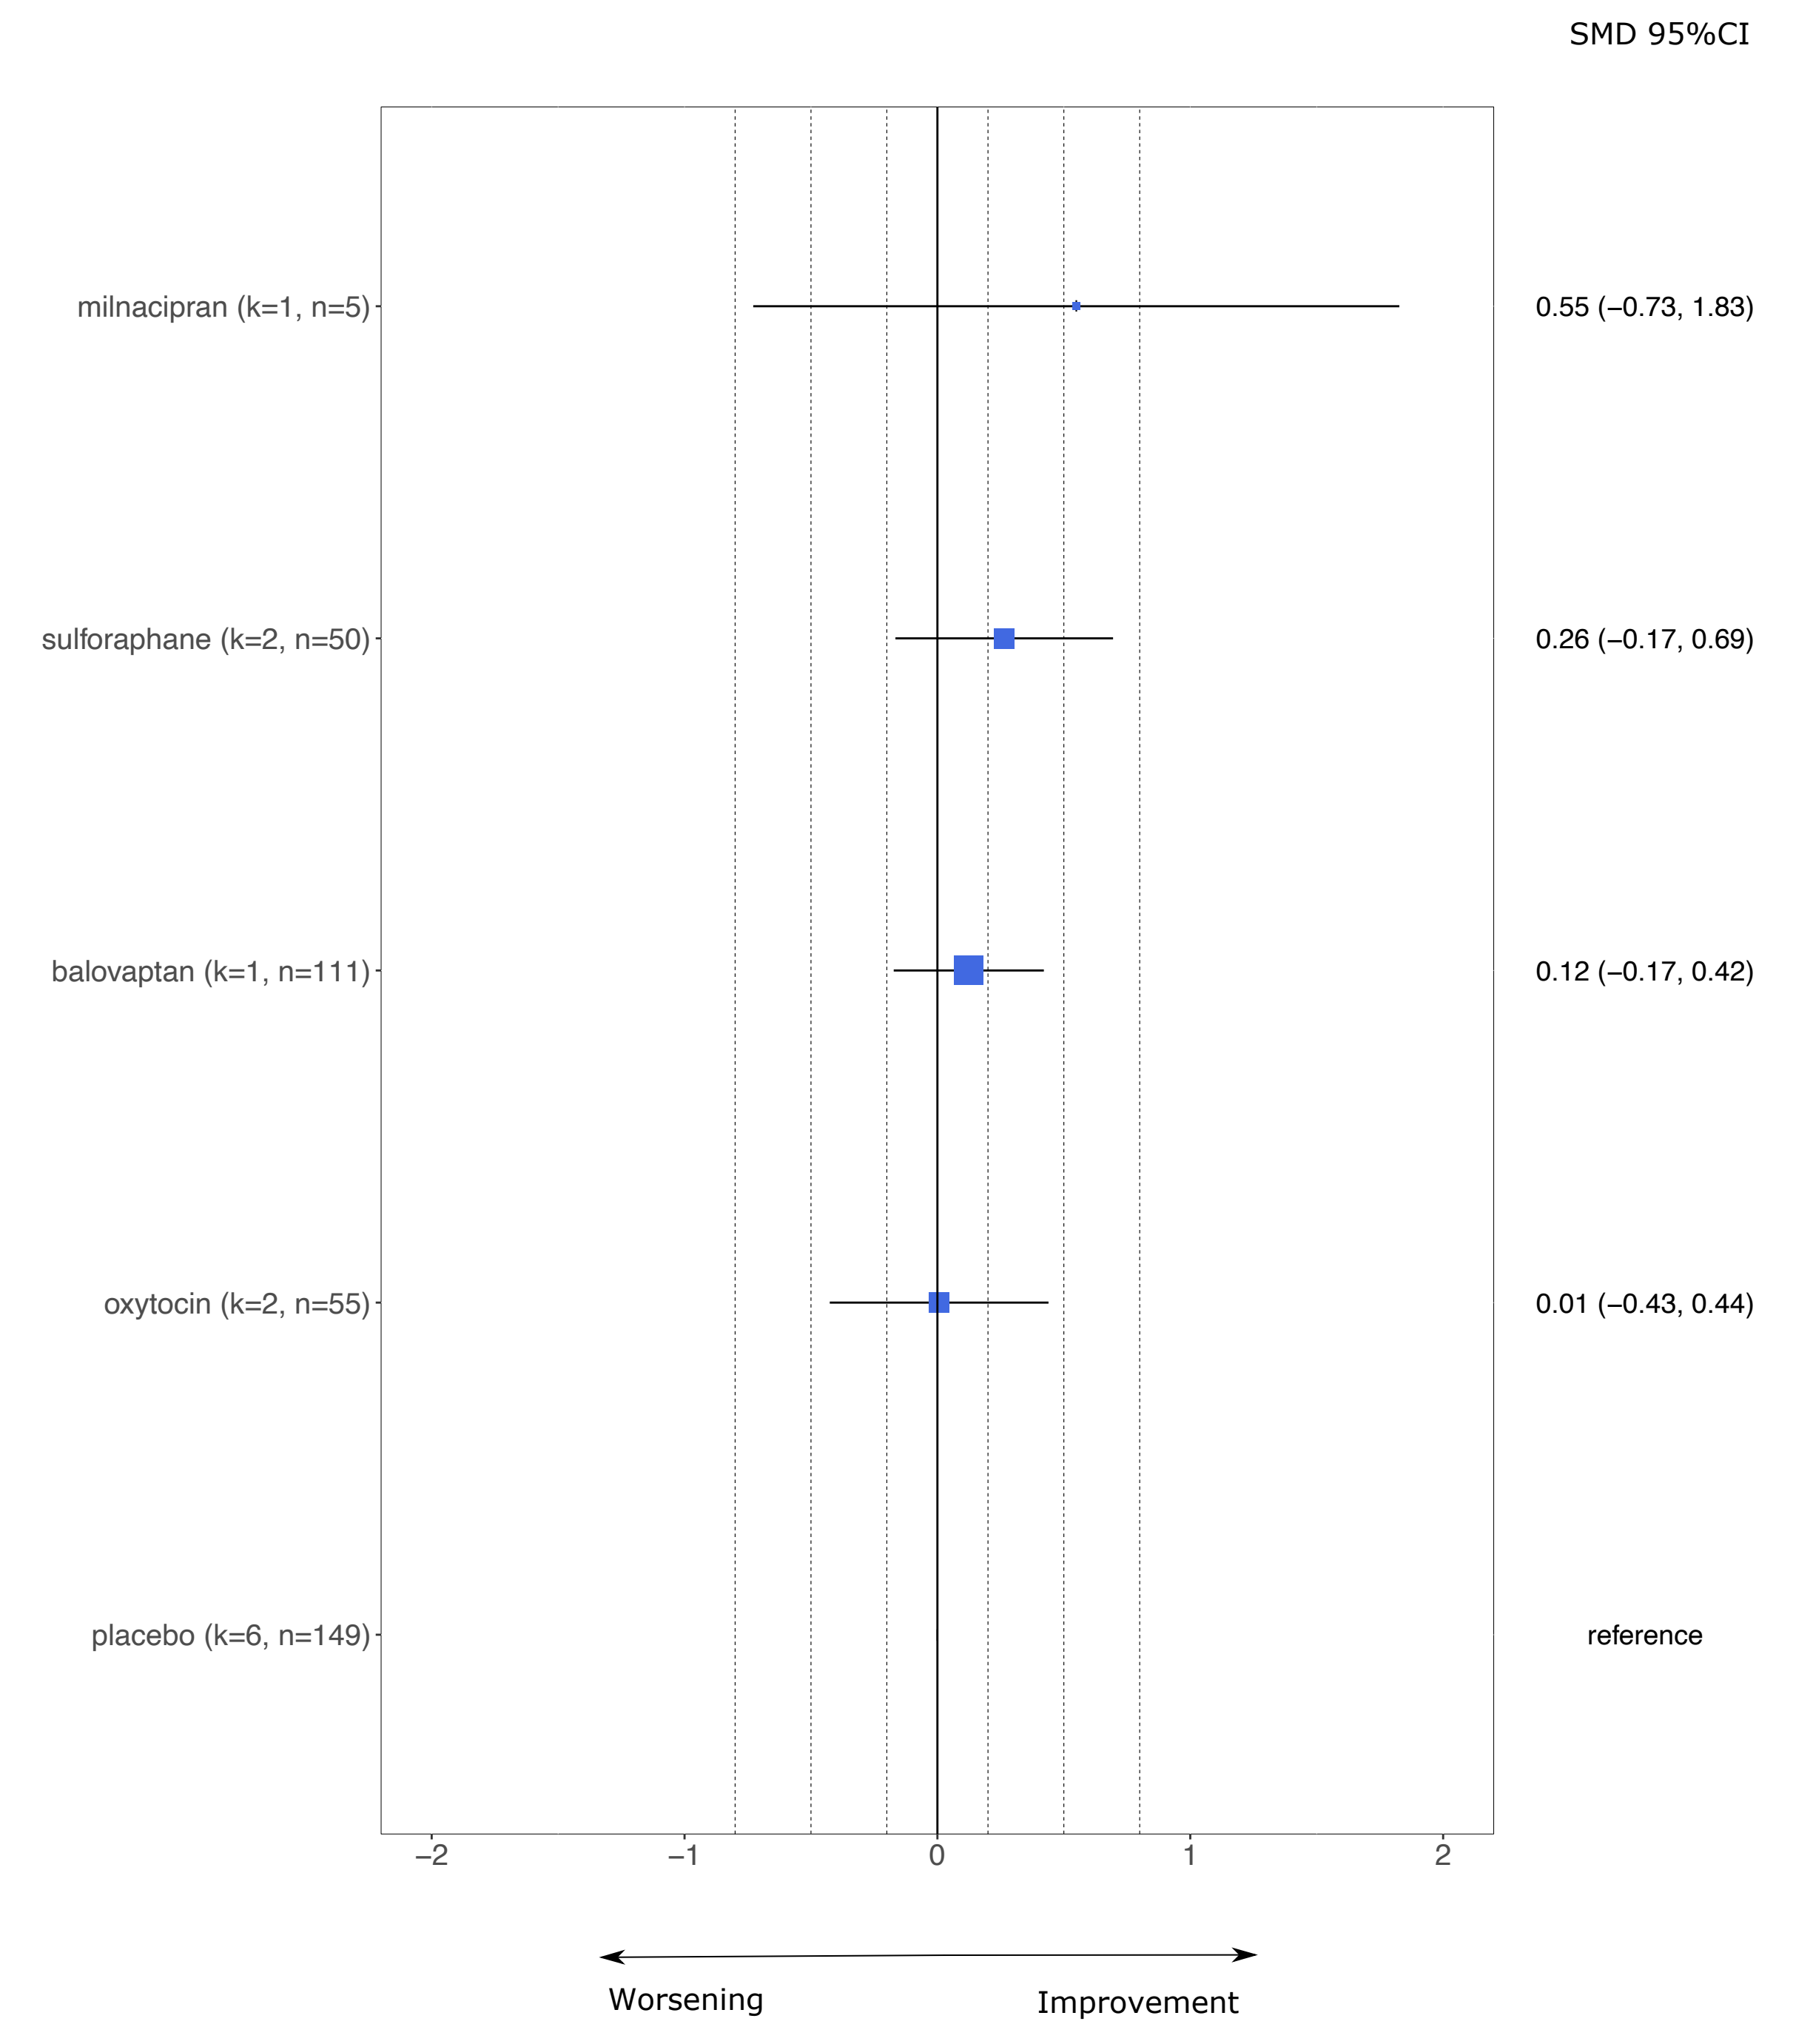

# Anxiety or depressive symptoms

## Children/adolescents

SMD 95%CI

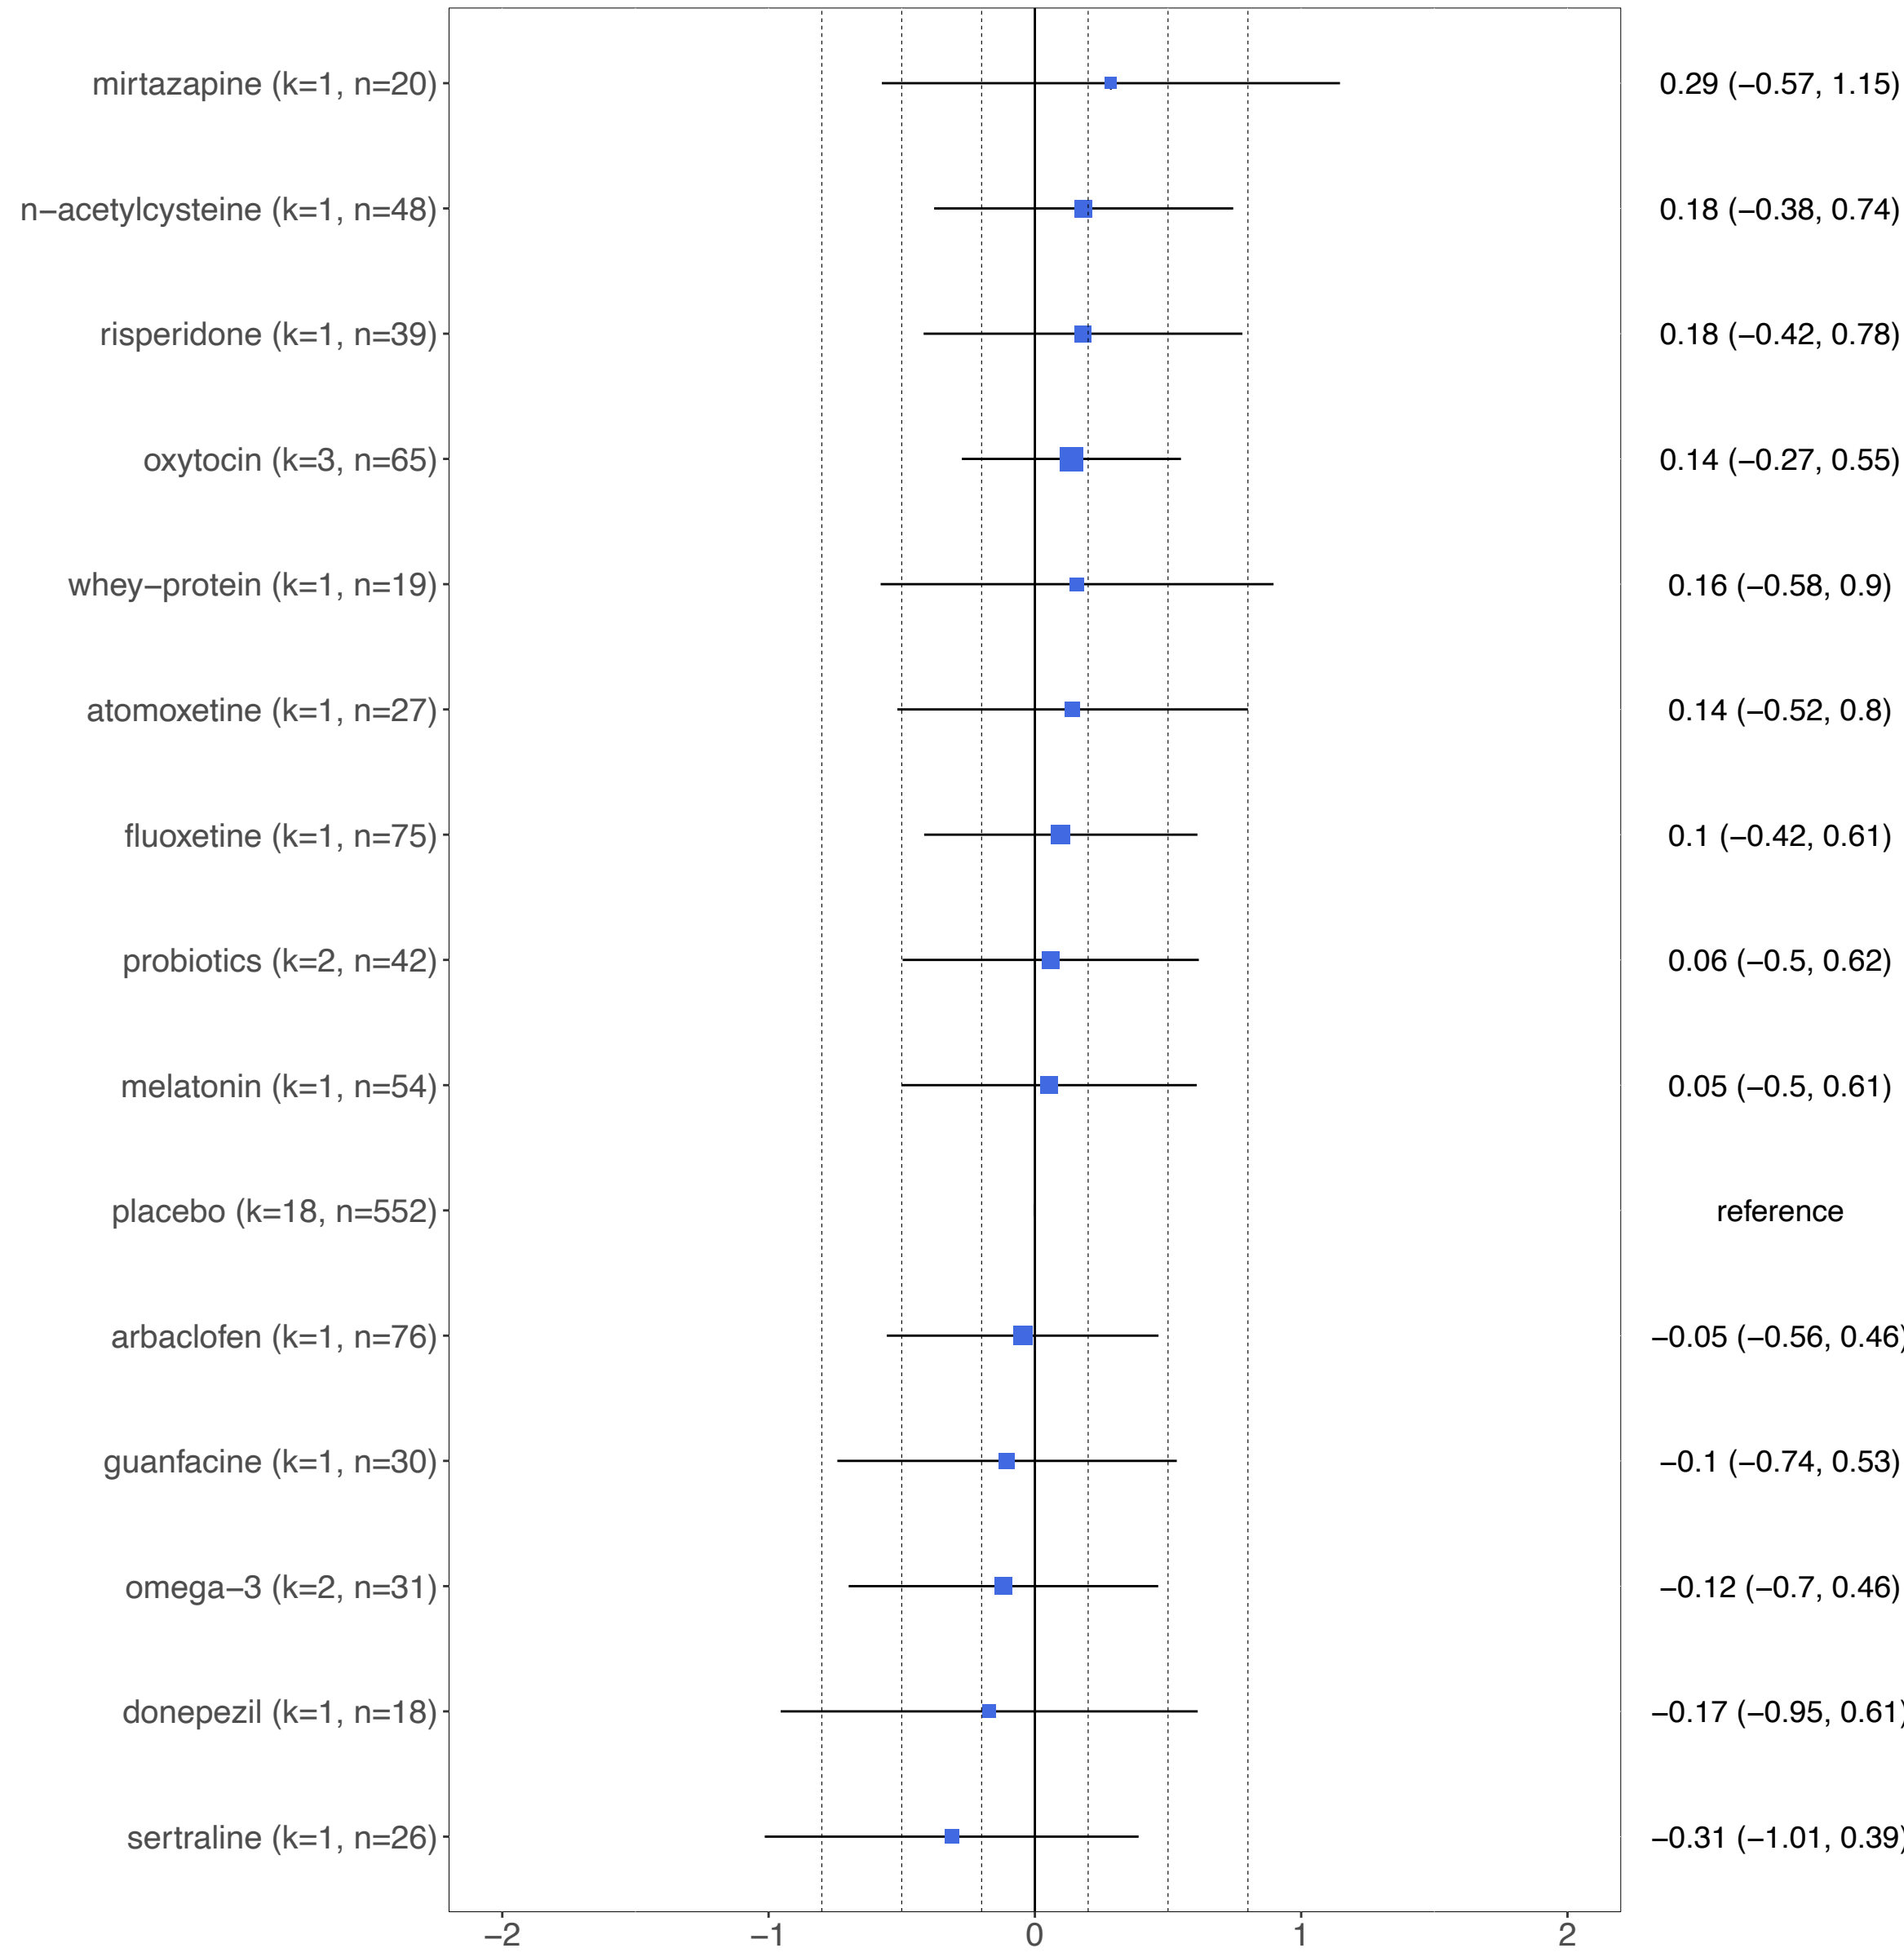

← Worsening      Improvement →

## Adults

SMD 95%CI

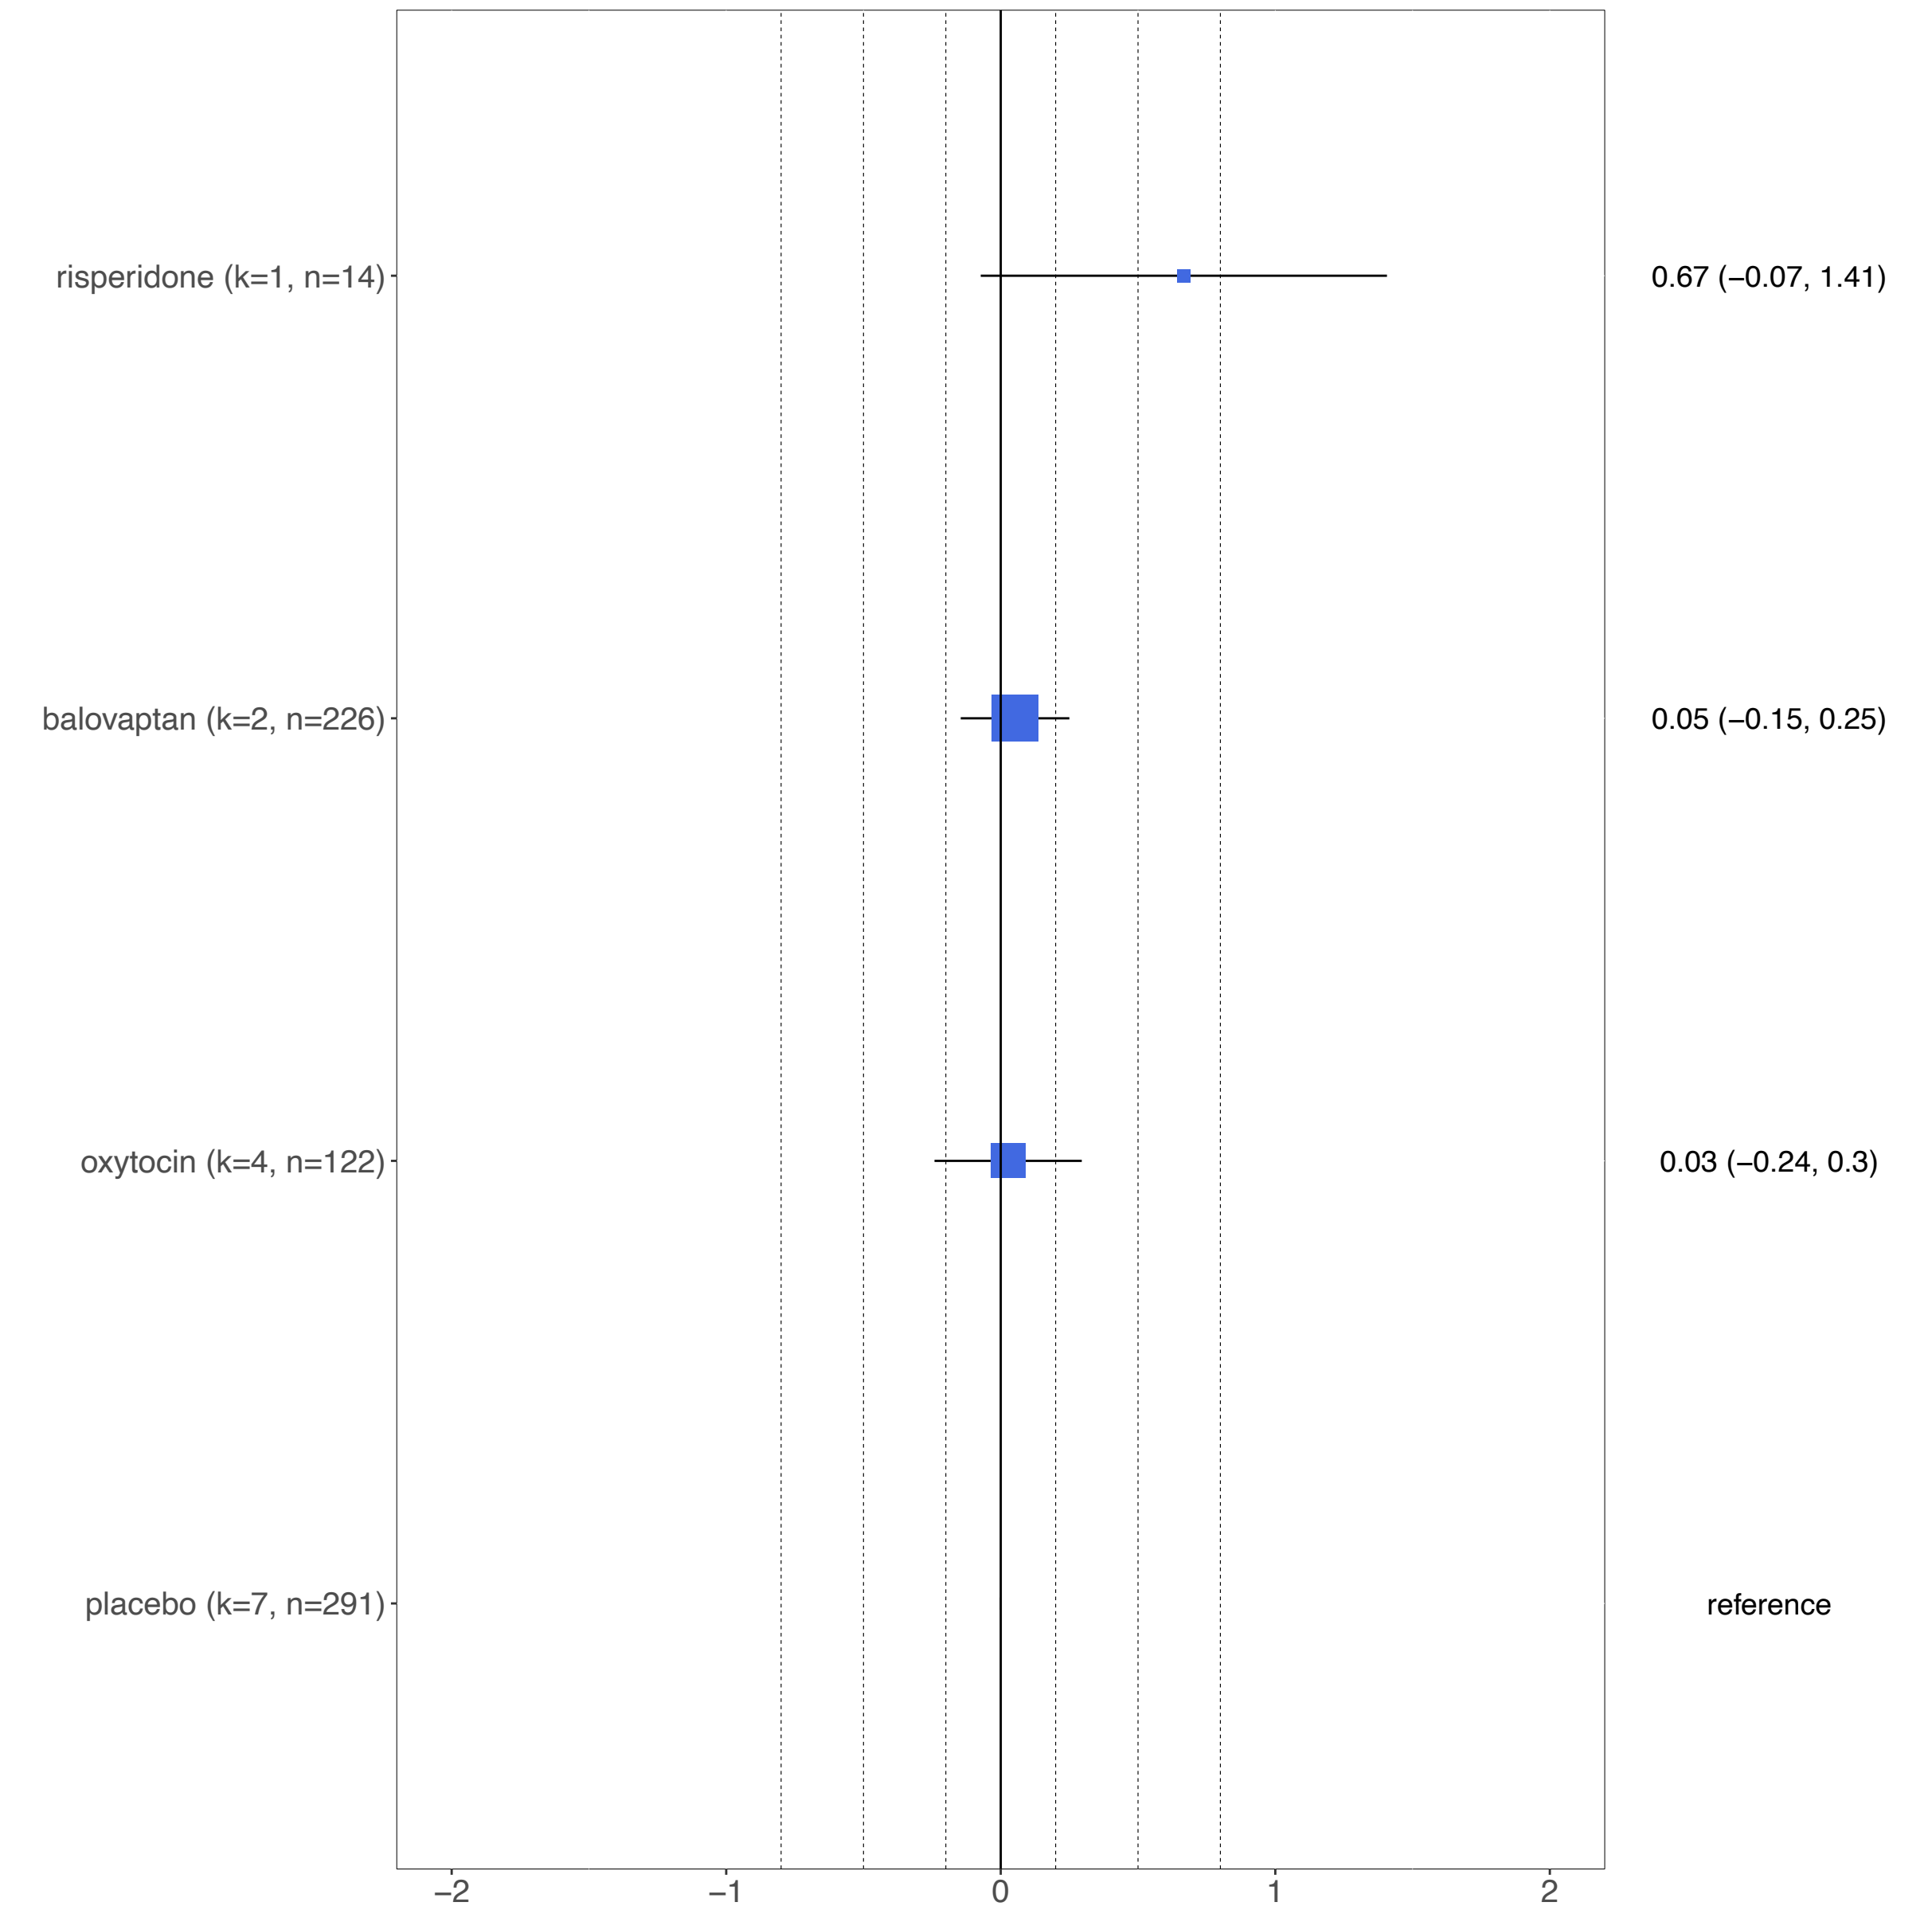

← Worsening      Improvement →

# Caregiver stress

## Children/adolescents

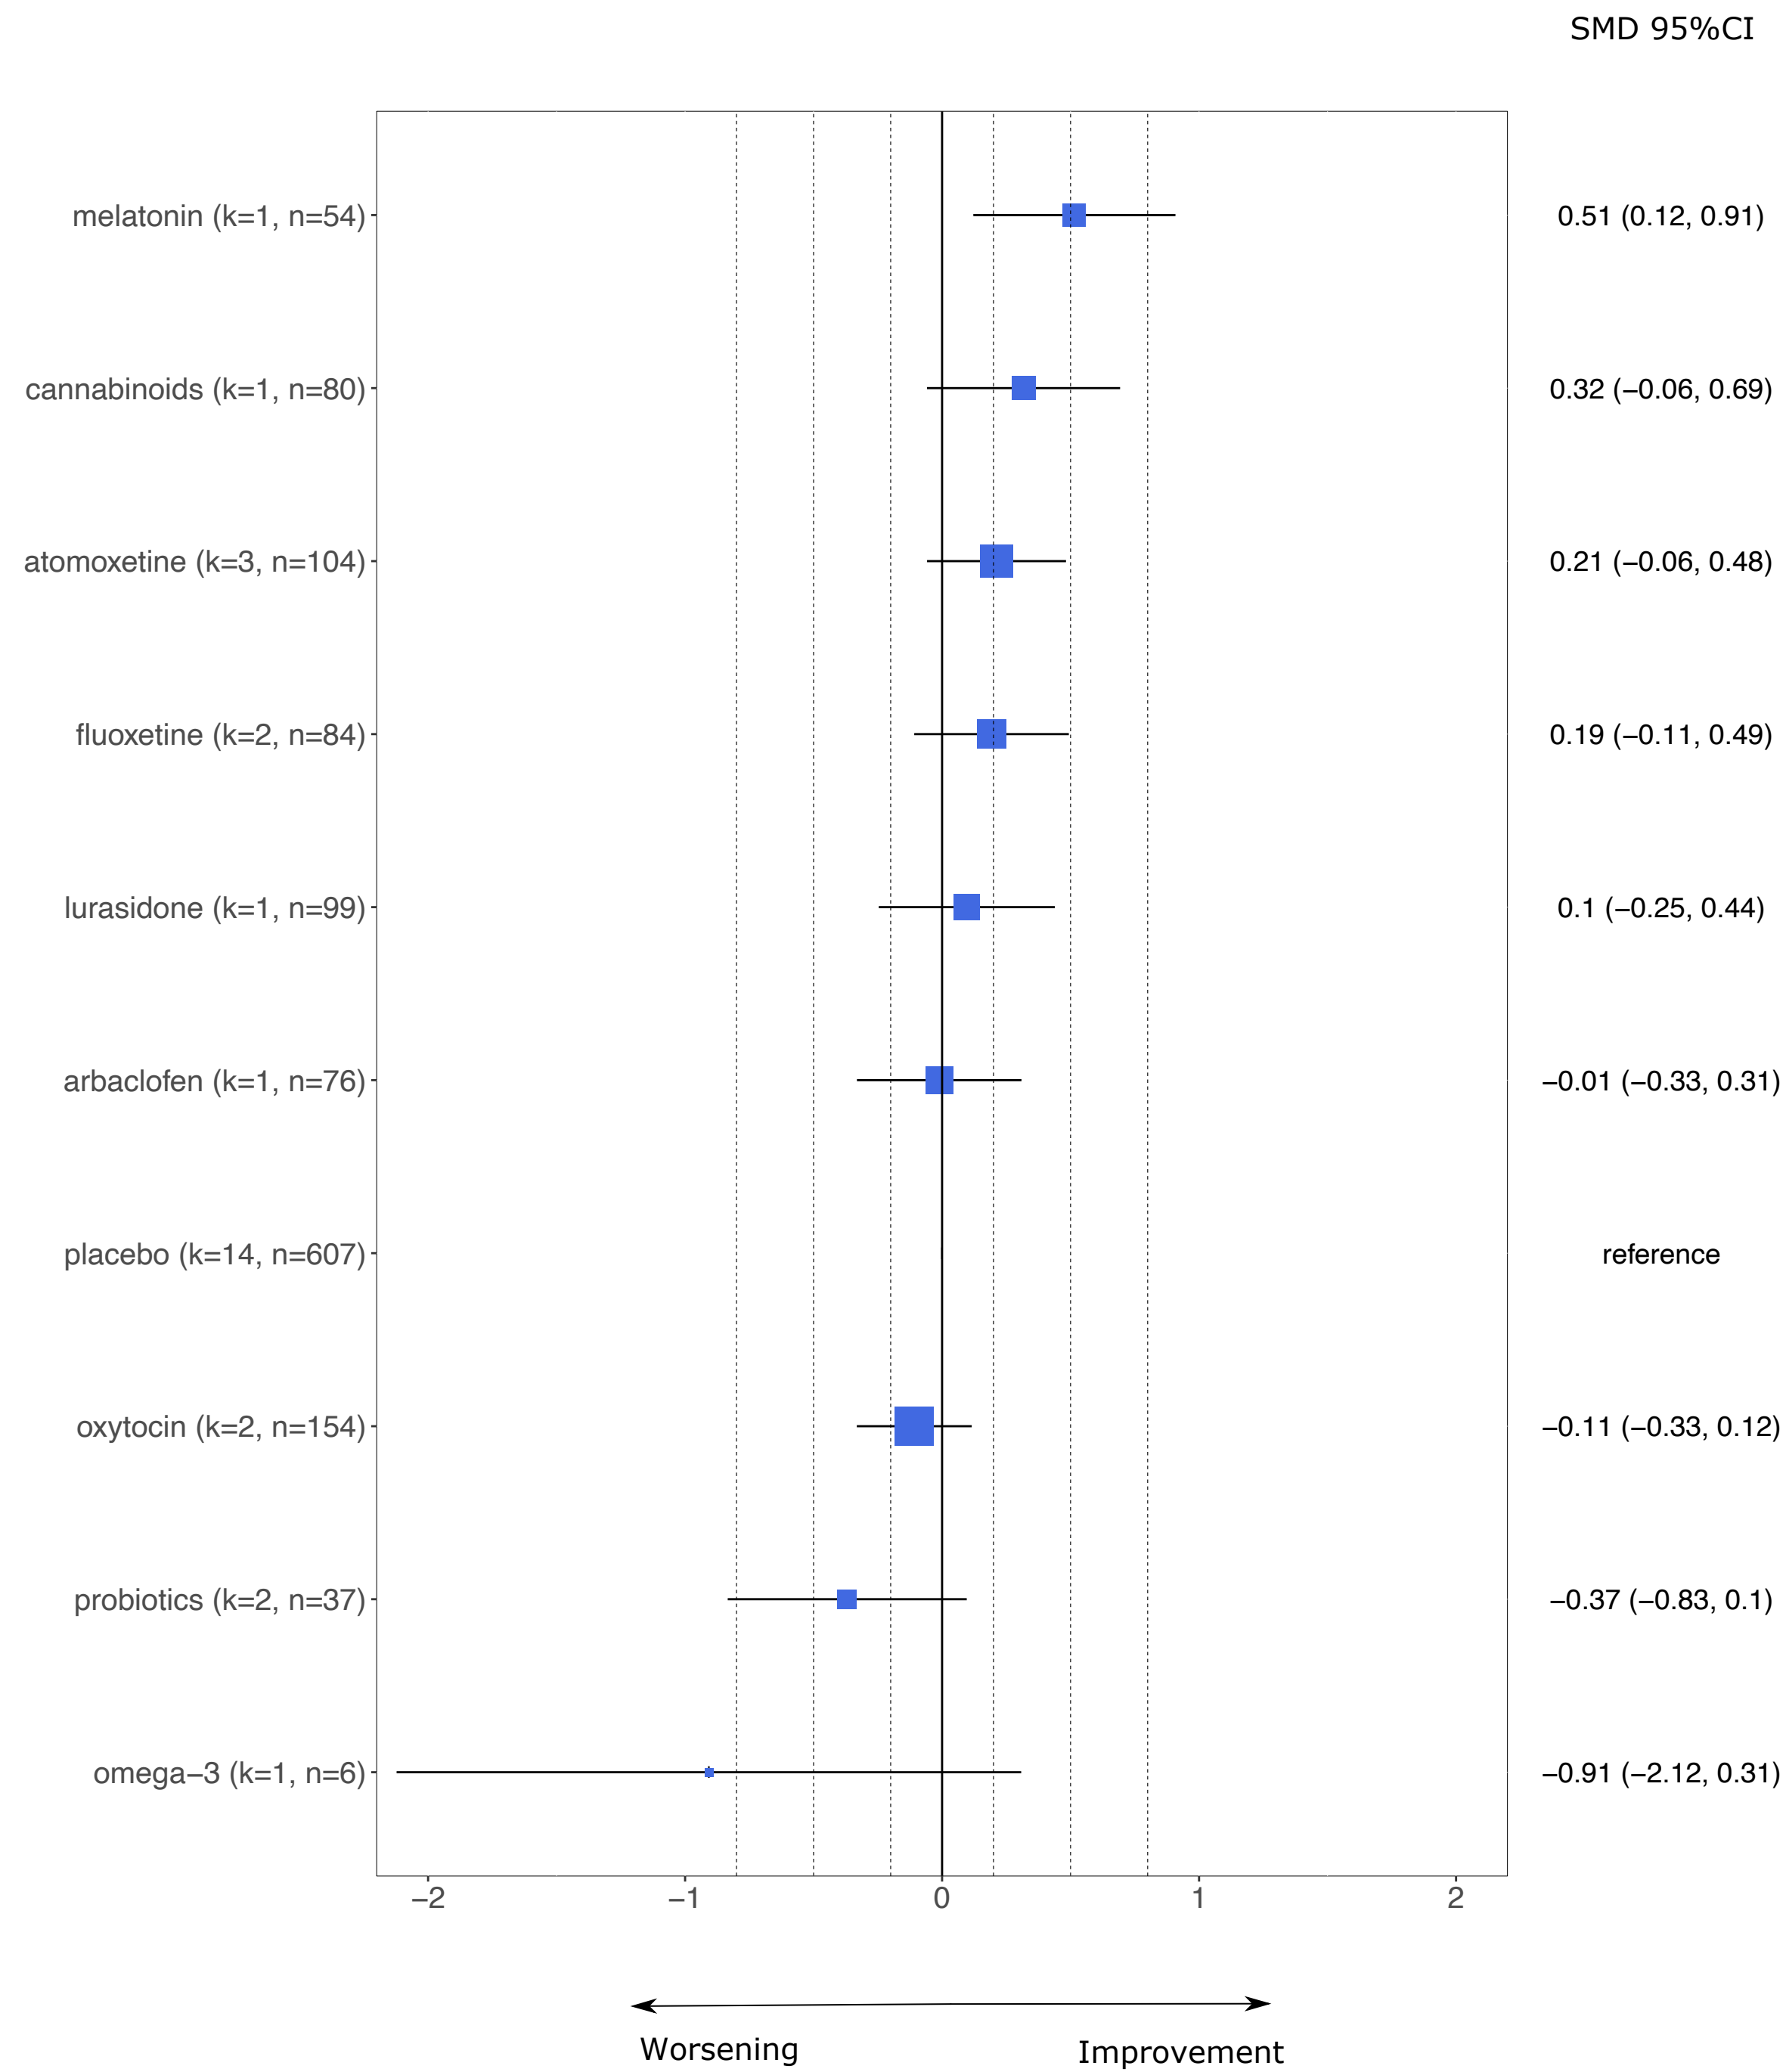

## Adults

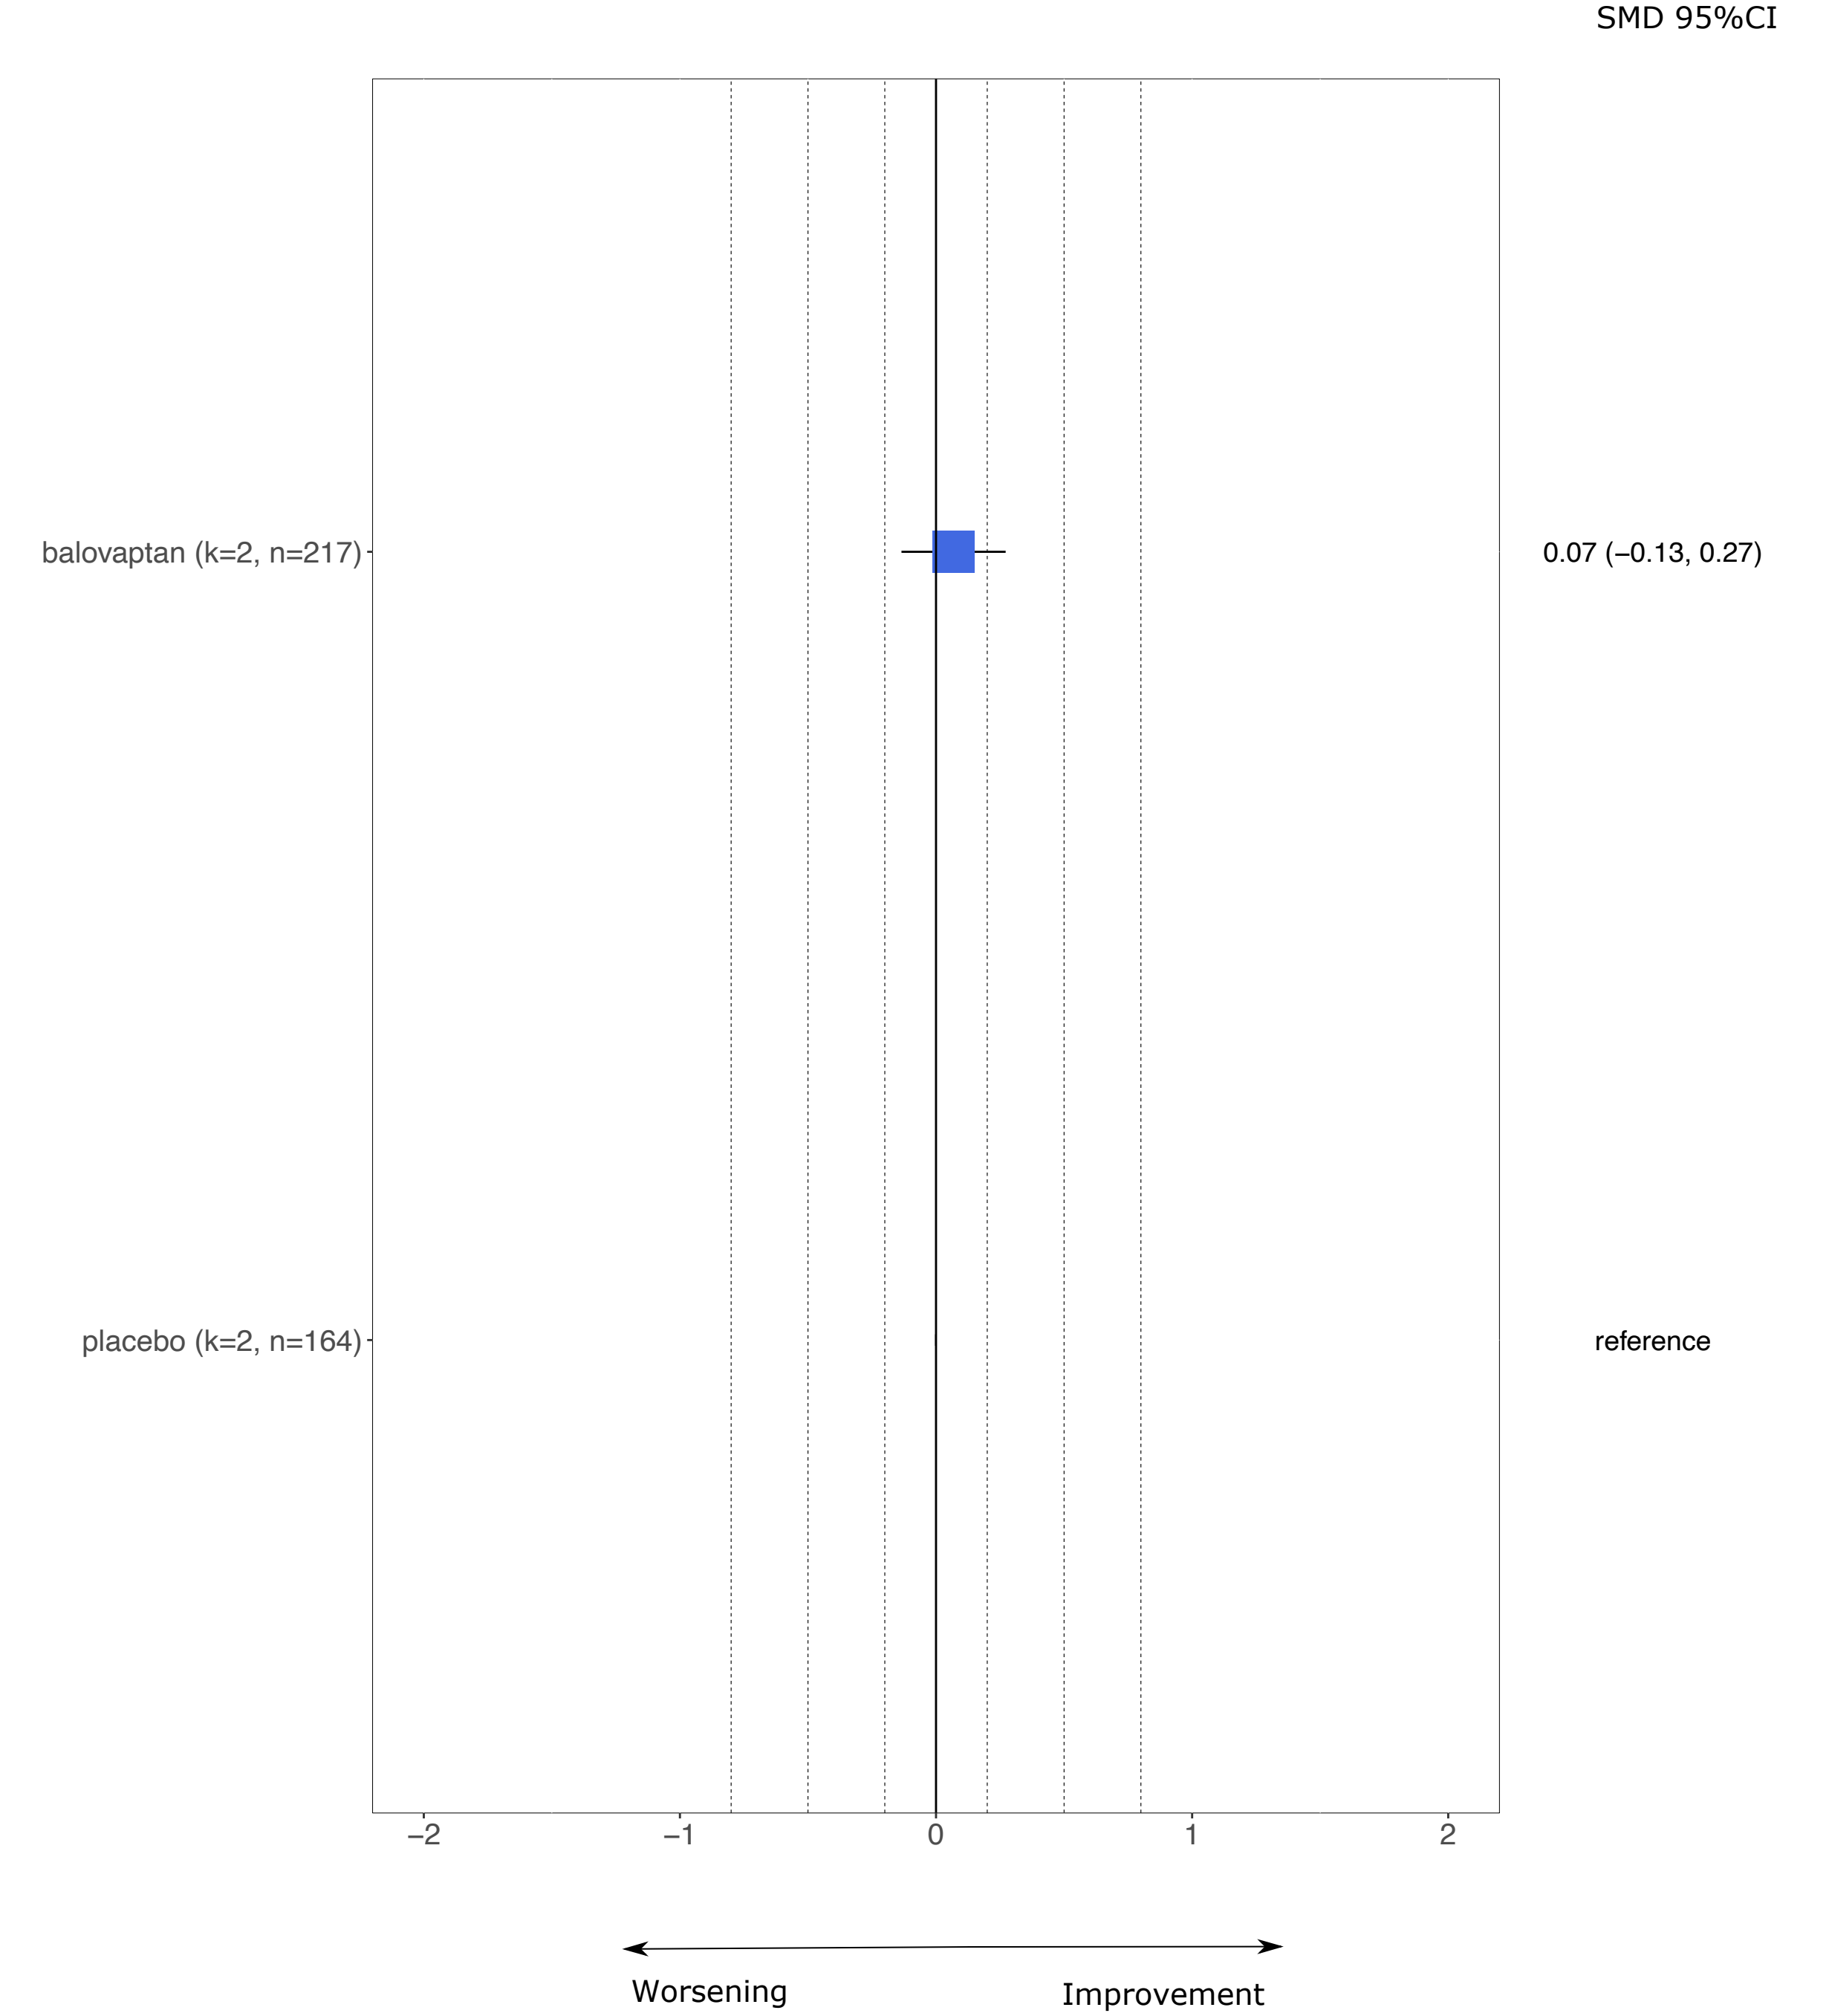

# Global functioning

## Children/adolescents

## Adults

SMD 95%CI

SMD 95%CI

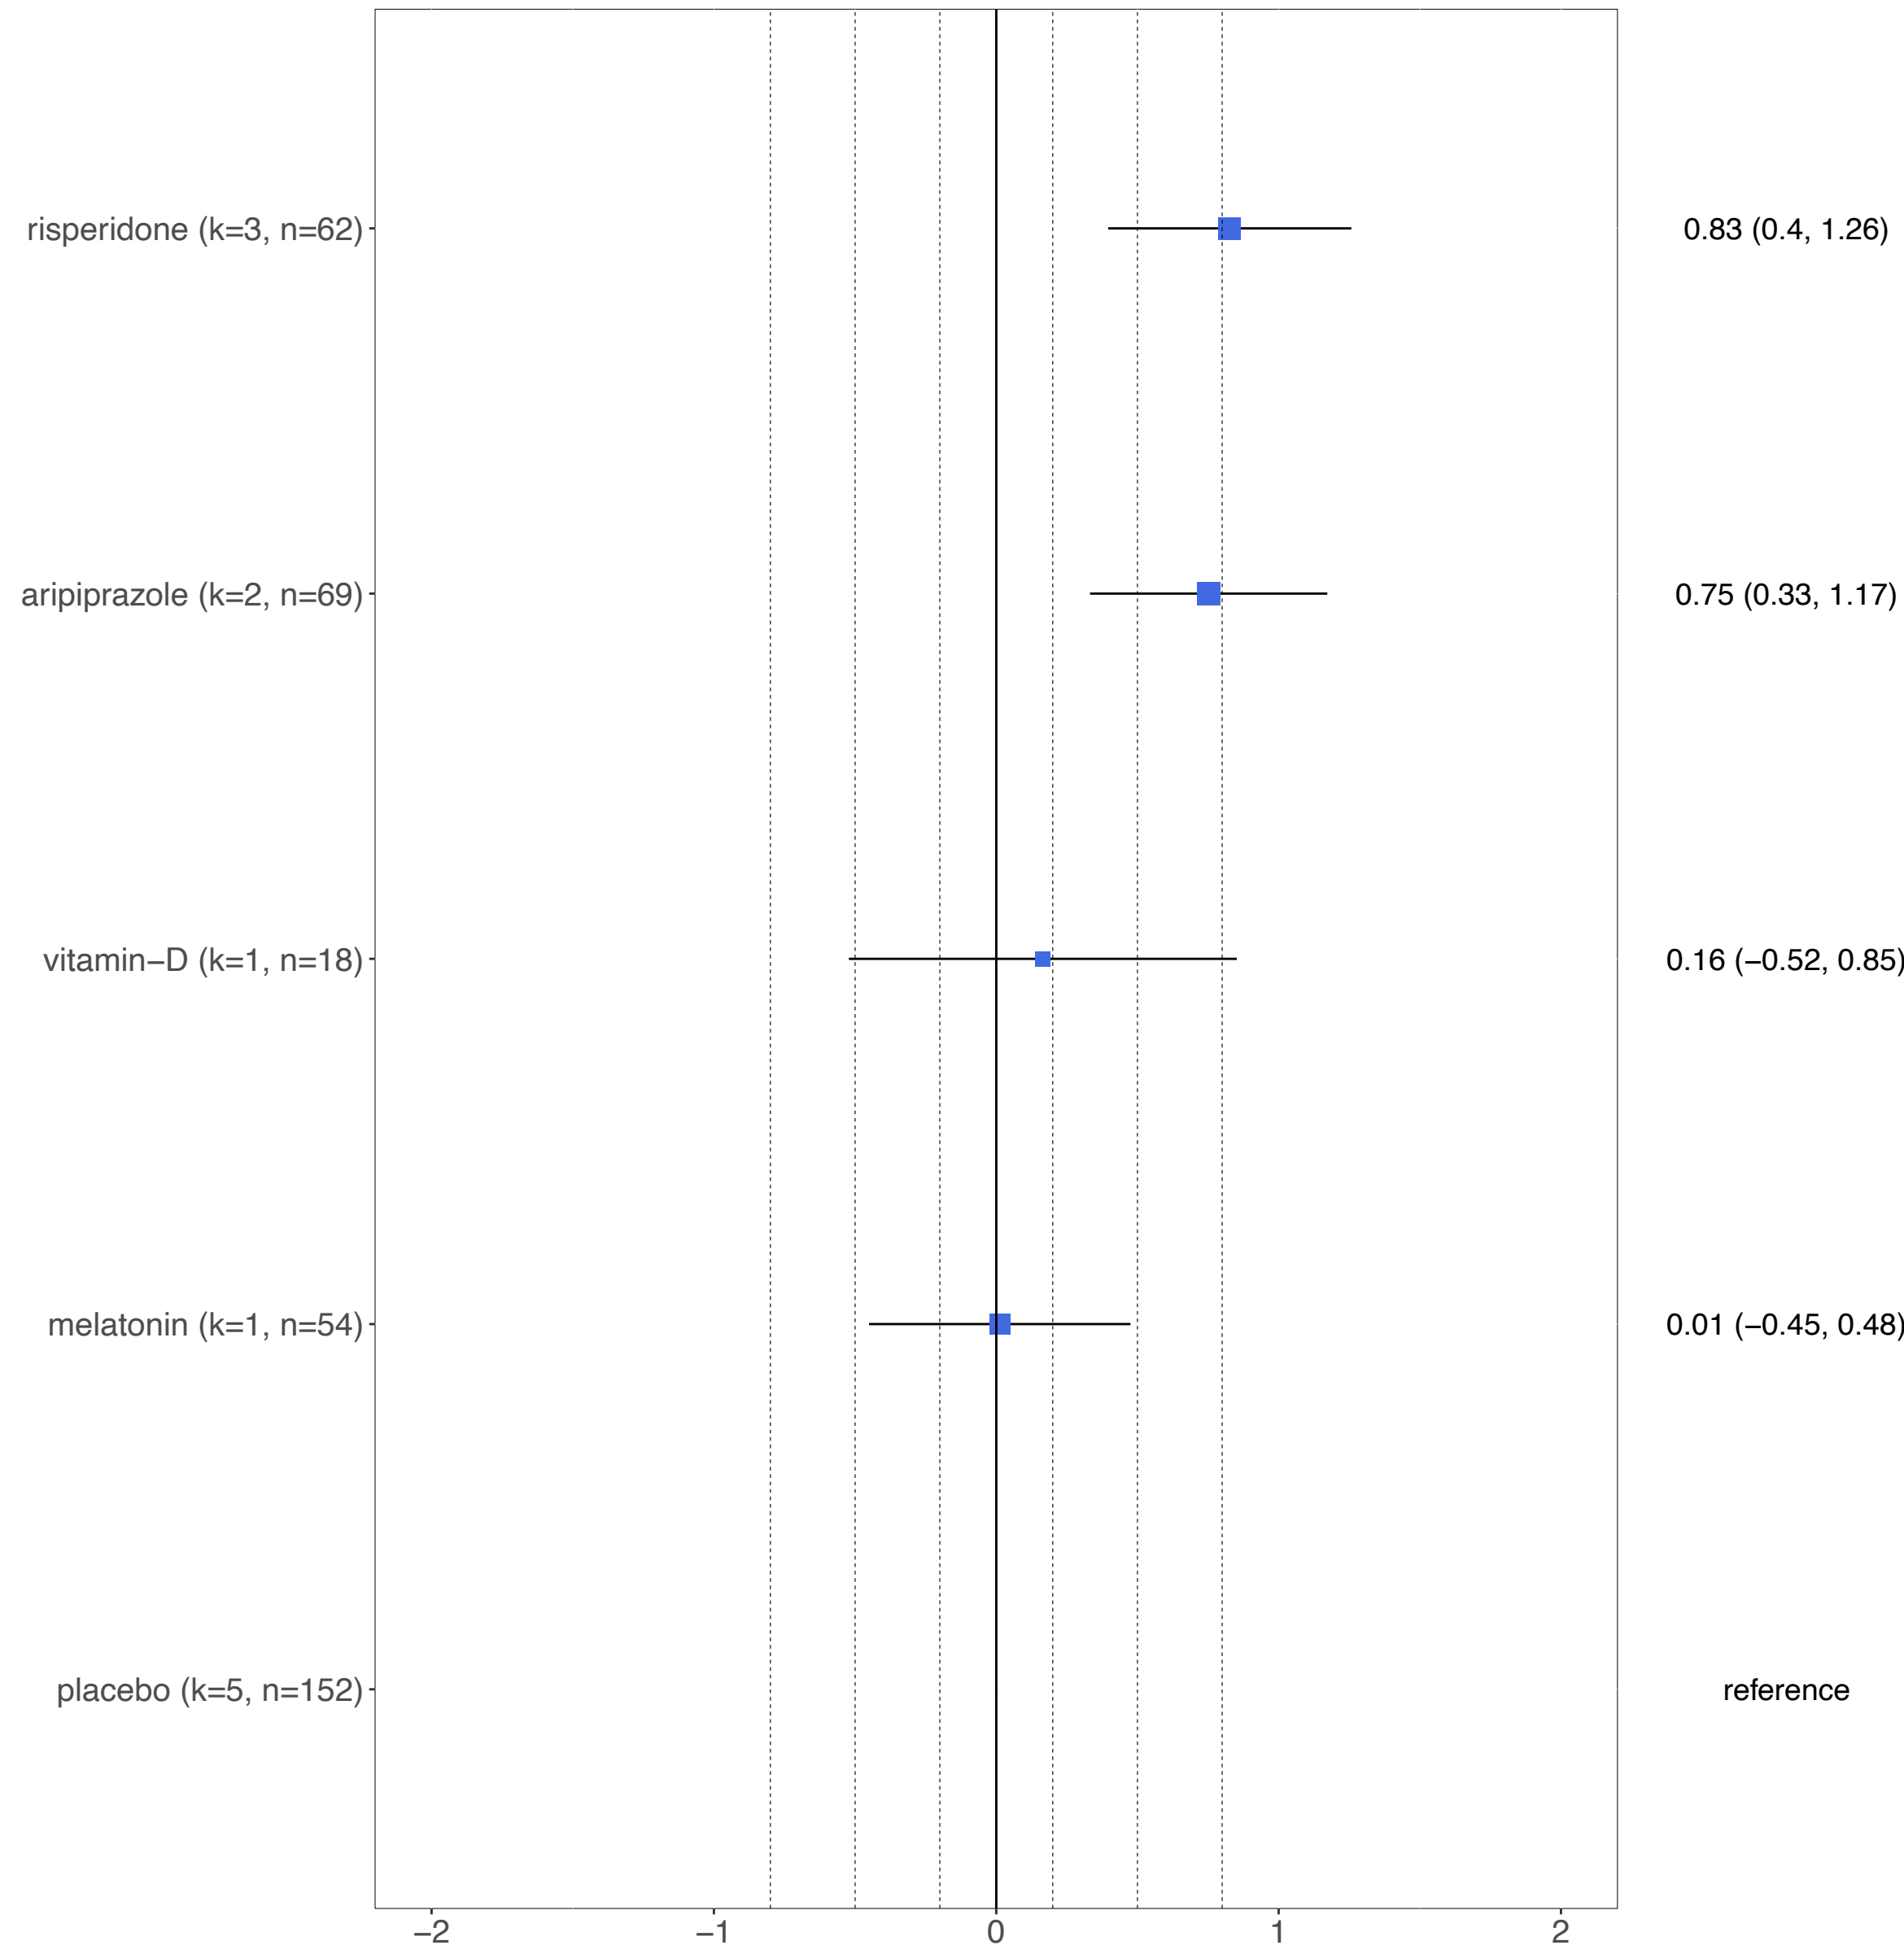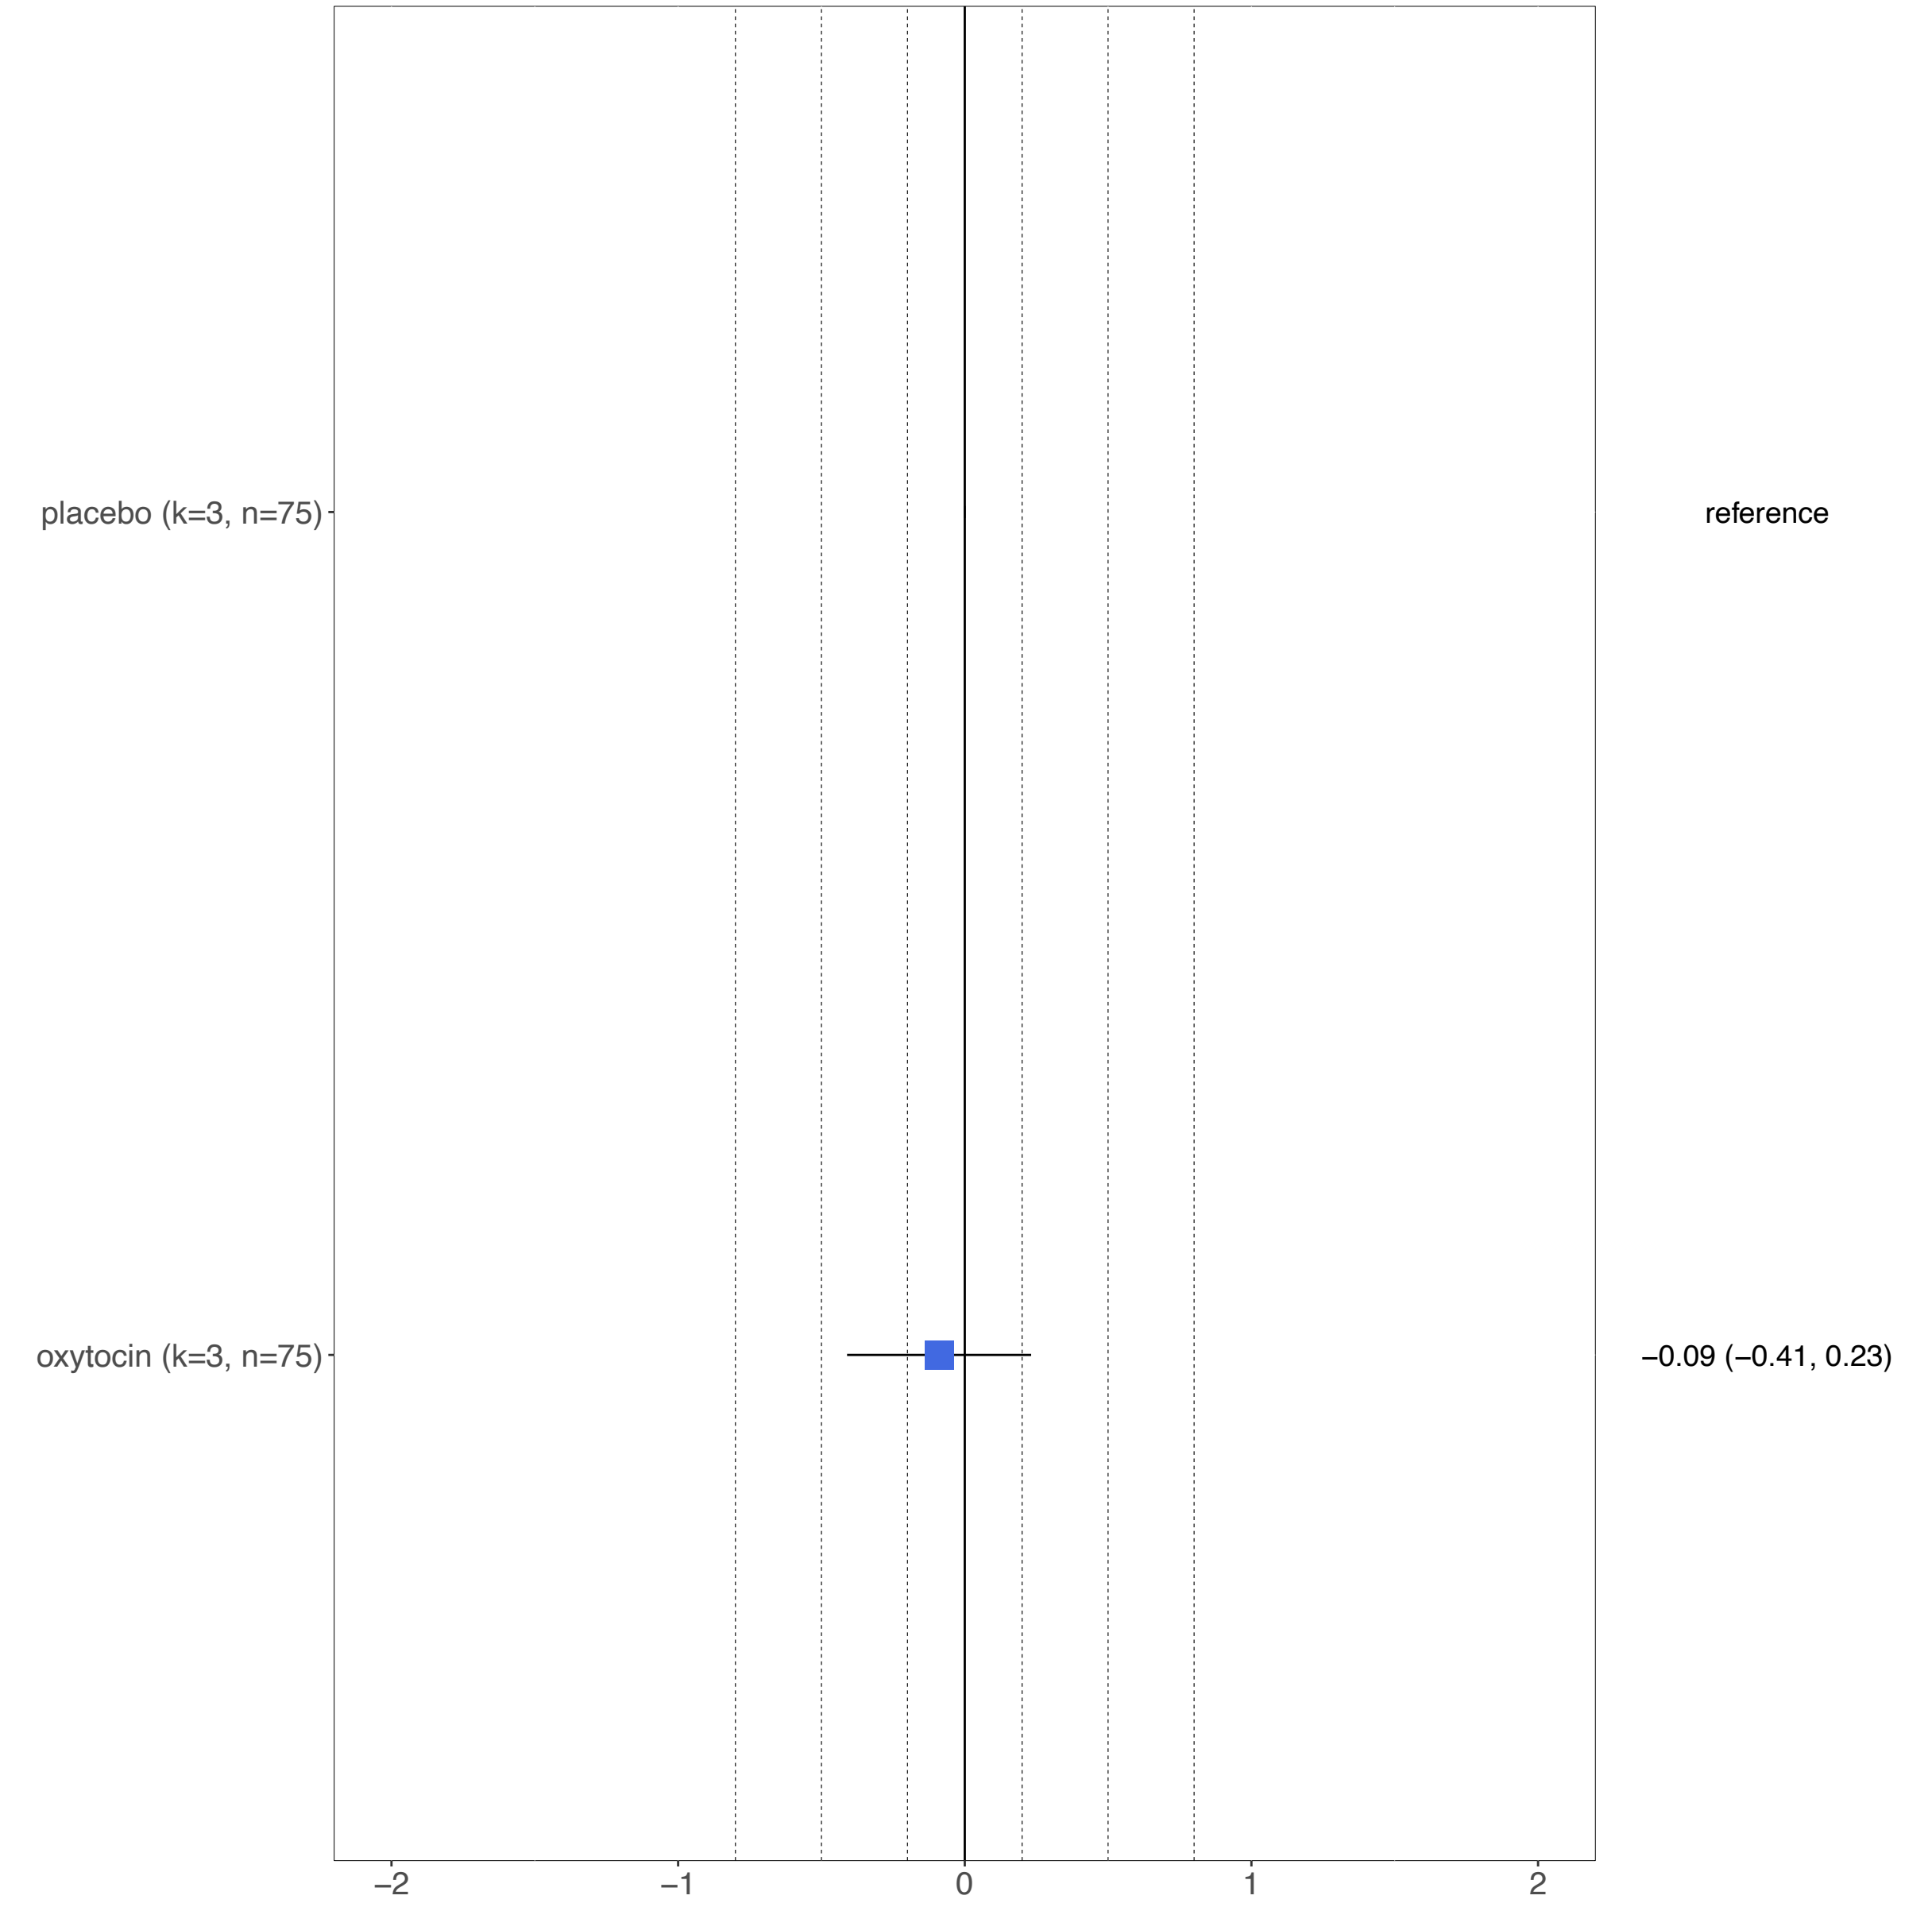

← Worsening      Improvement →

← Worsening      Improvement →

# Quality of life

## Children/adolescents

SMD 95%CI

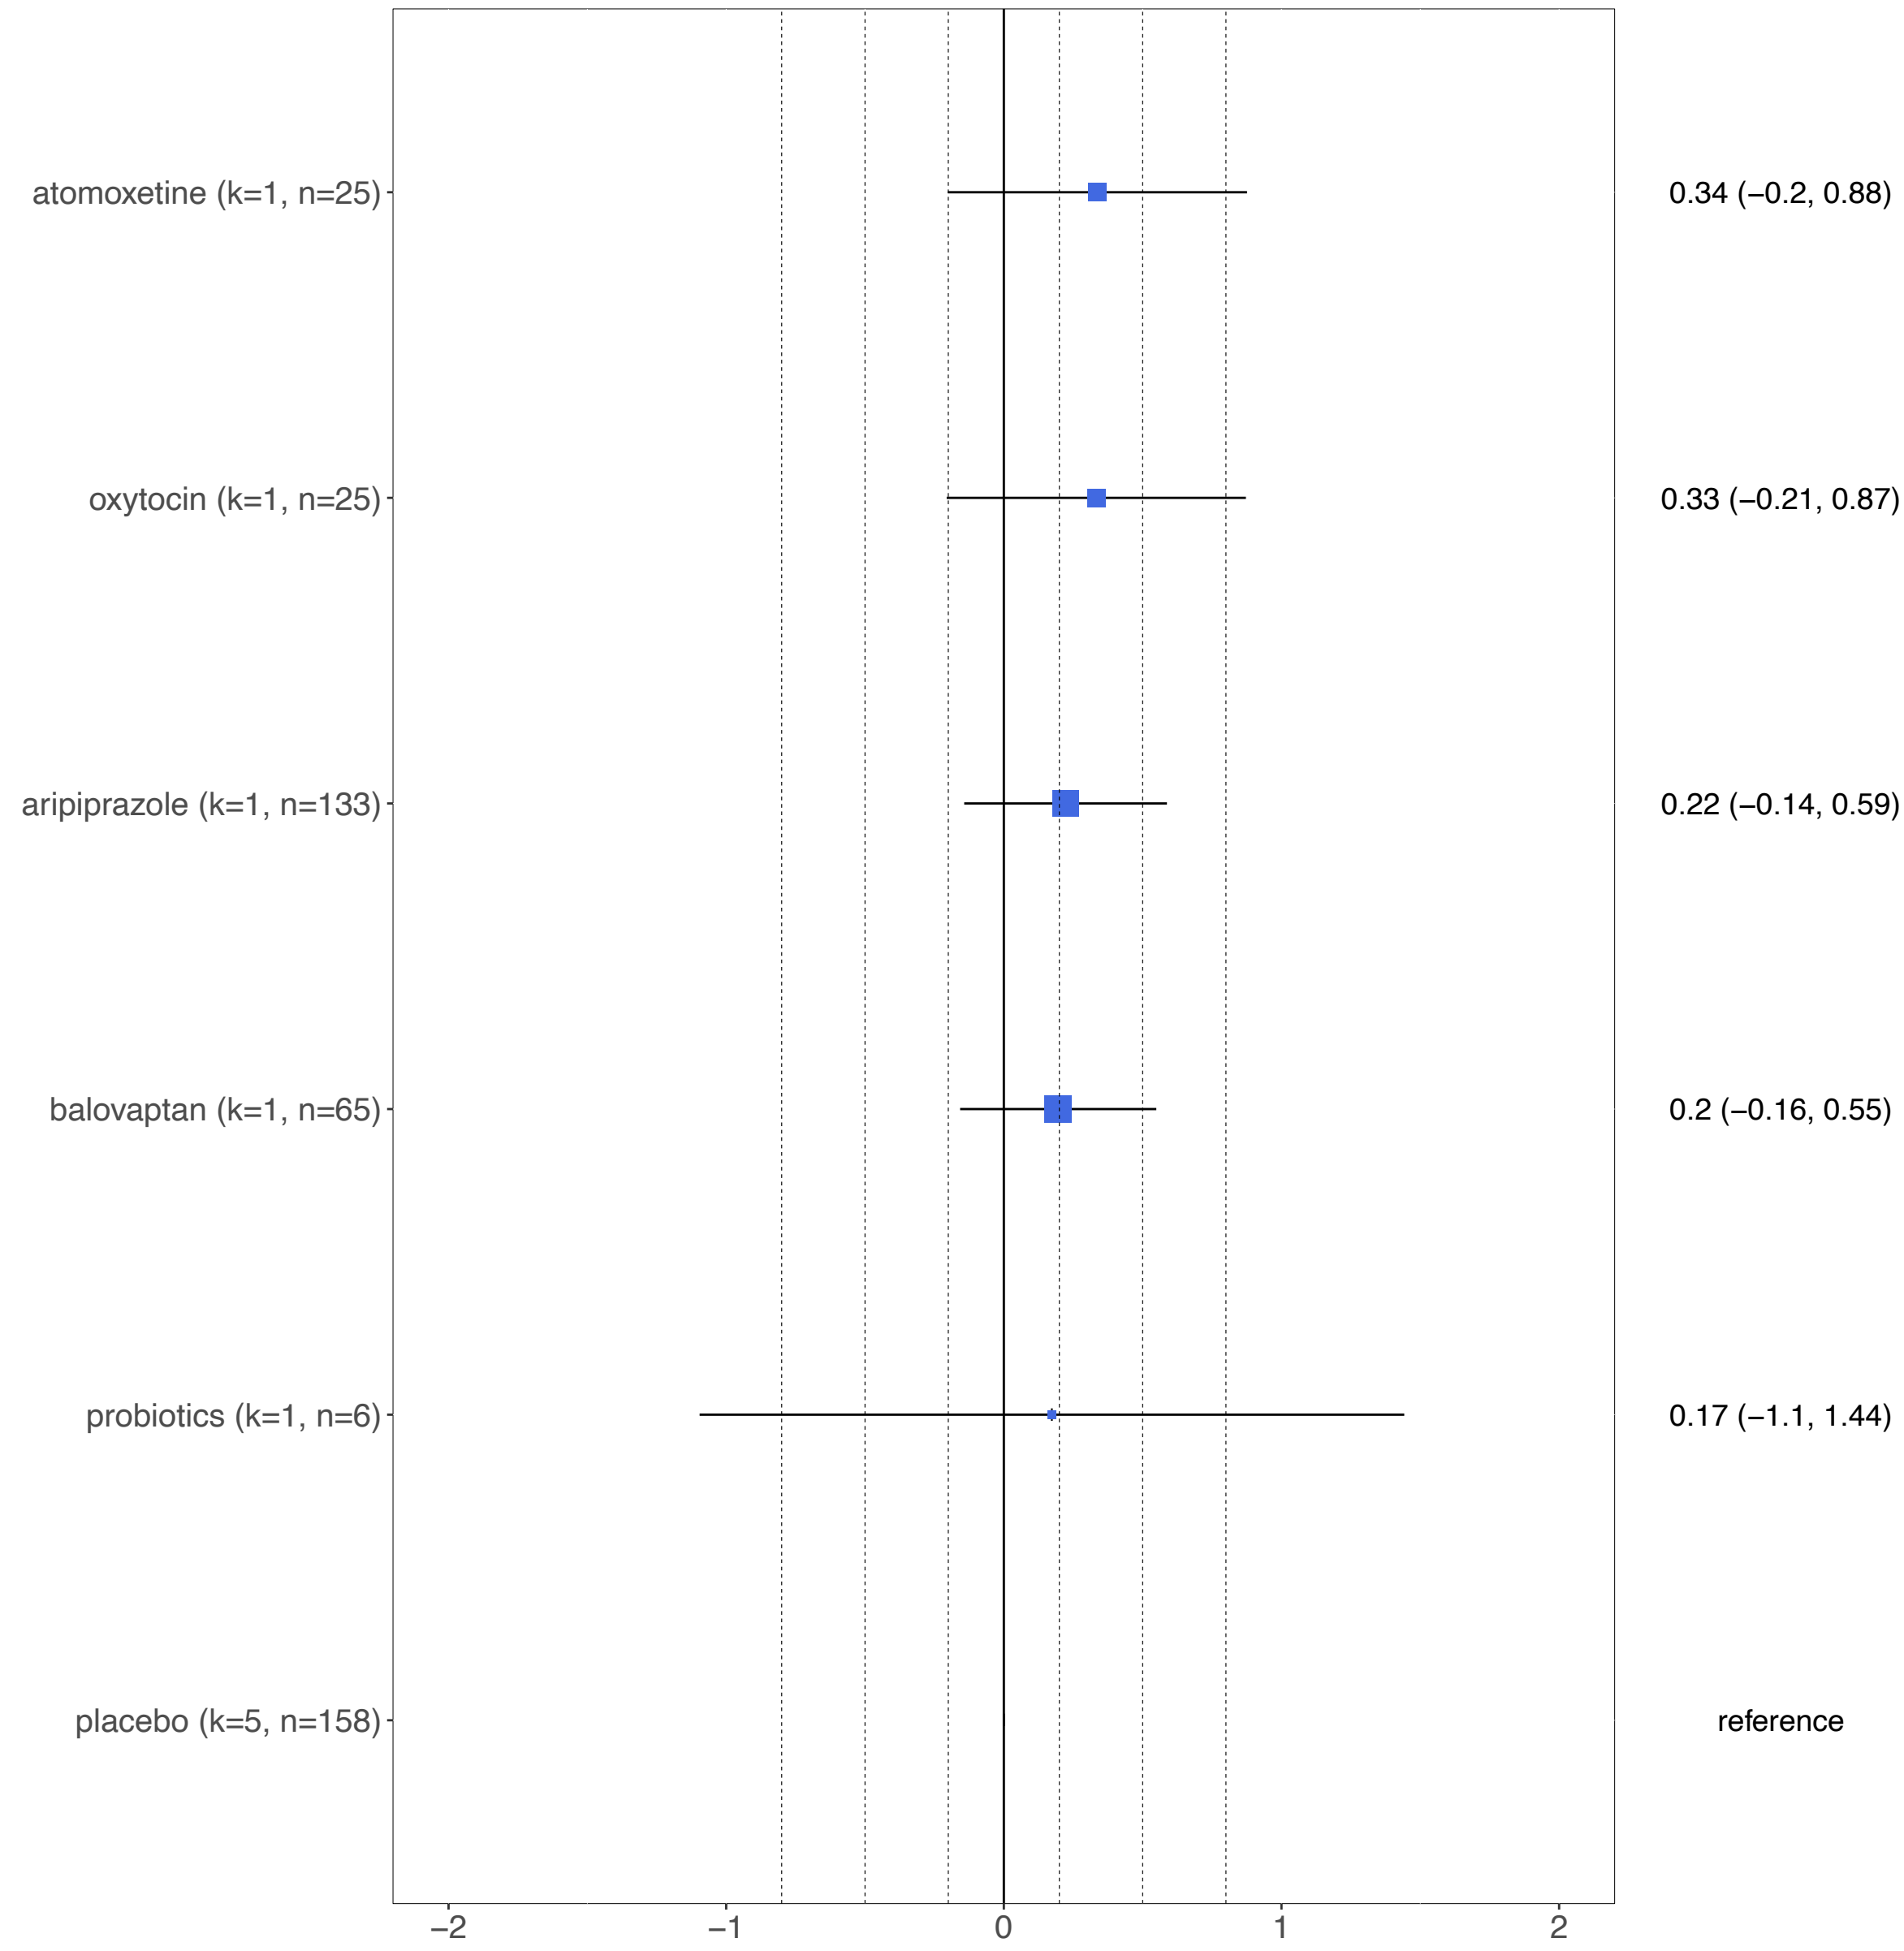

← Worsening      Improvement →

## Adults

SMD 95%CI

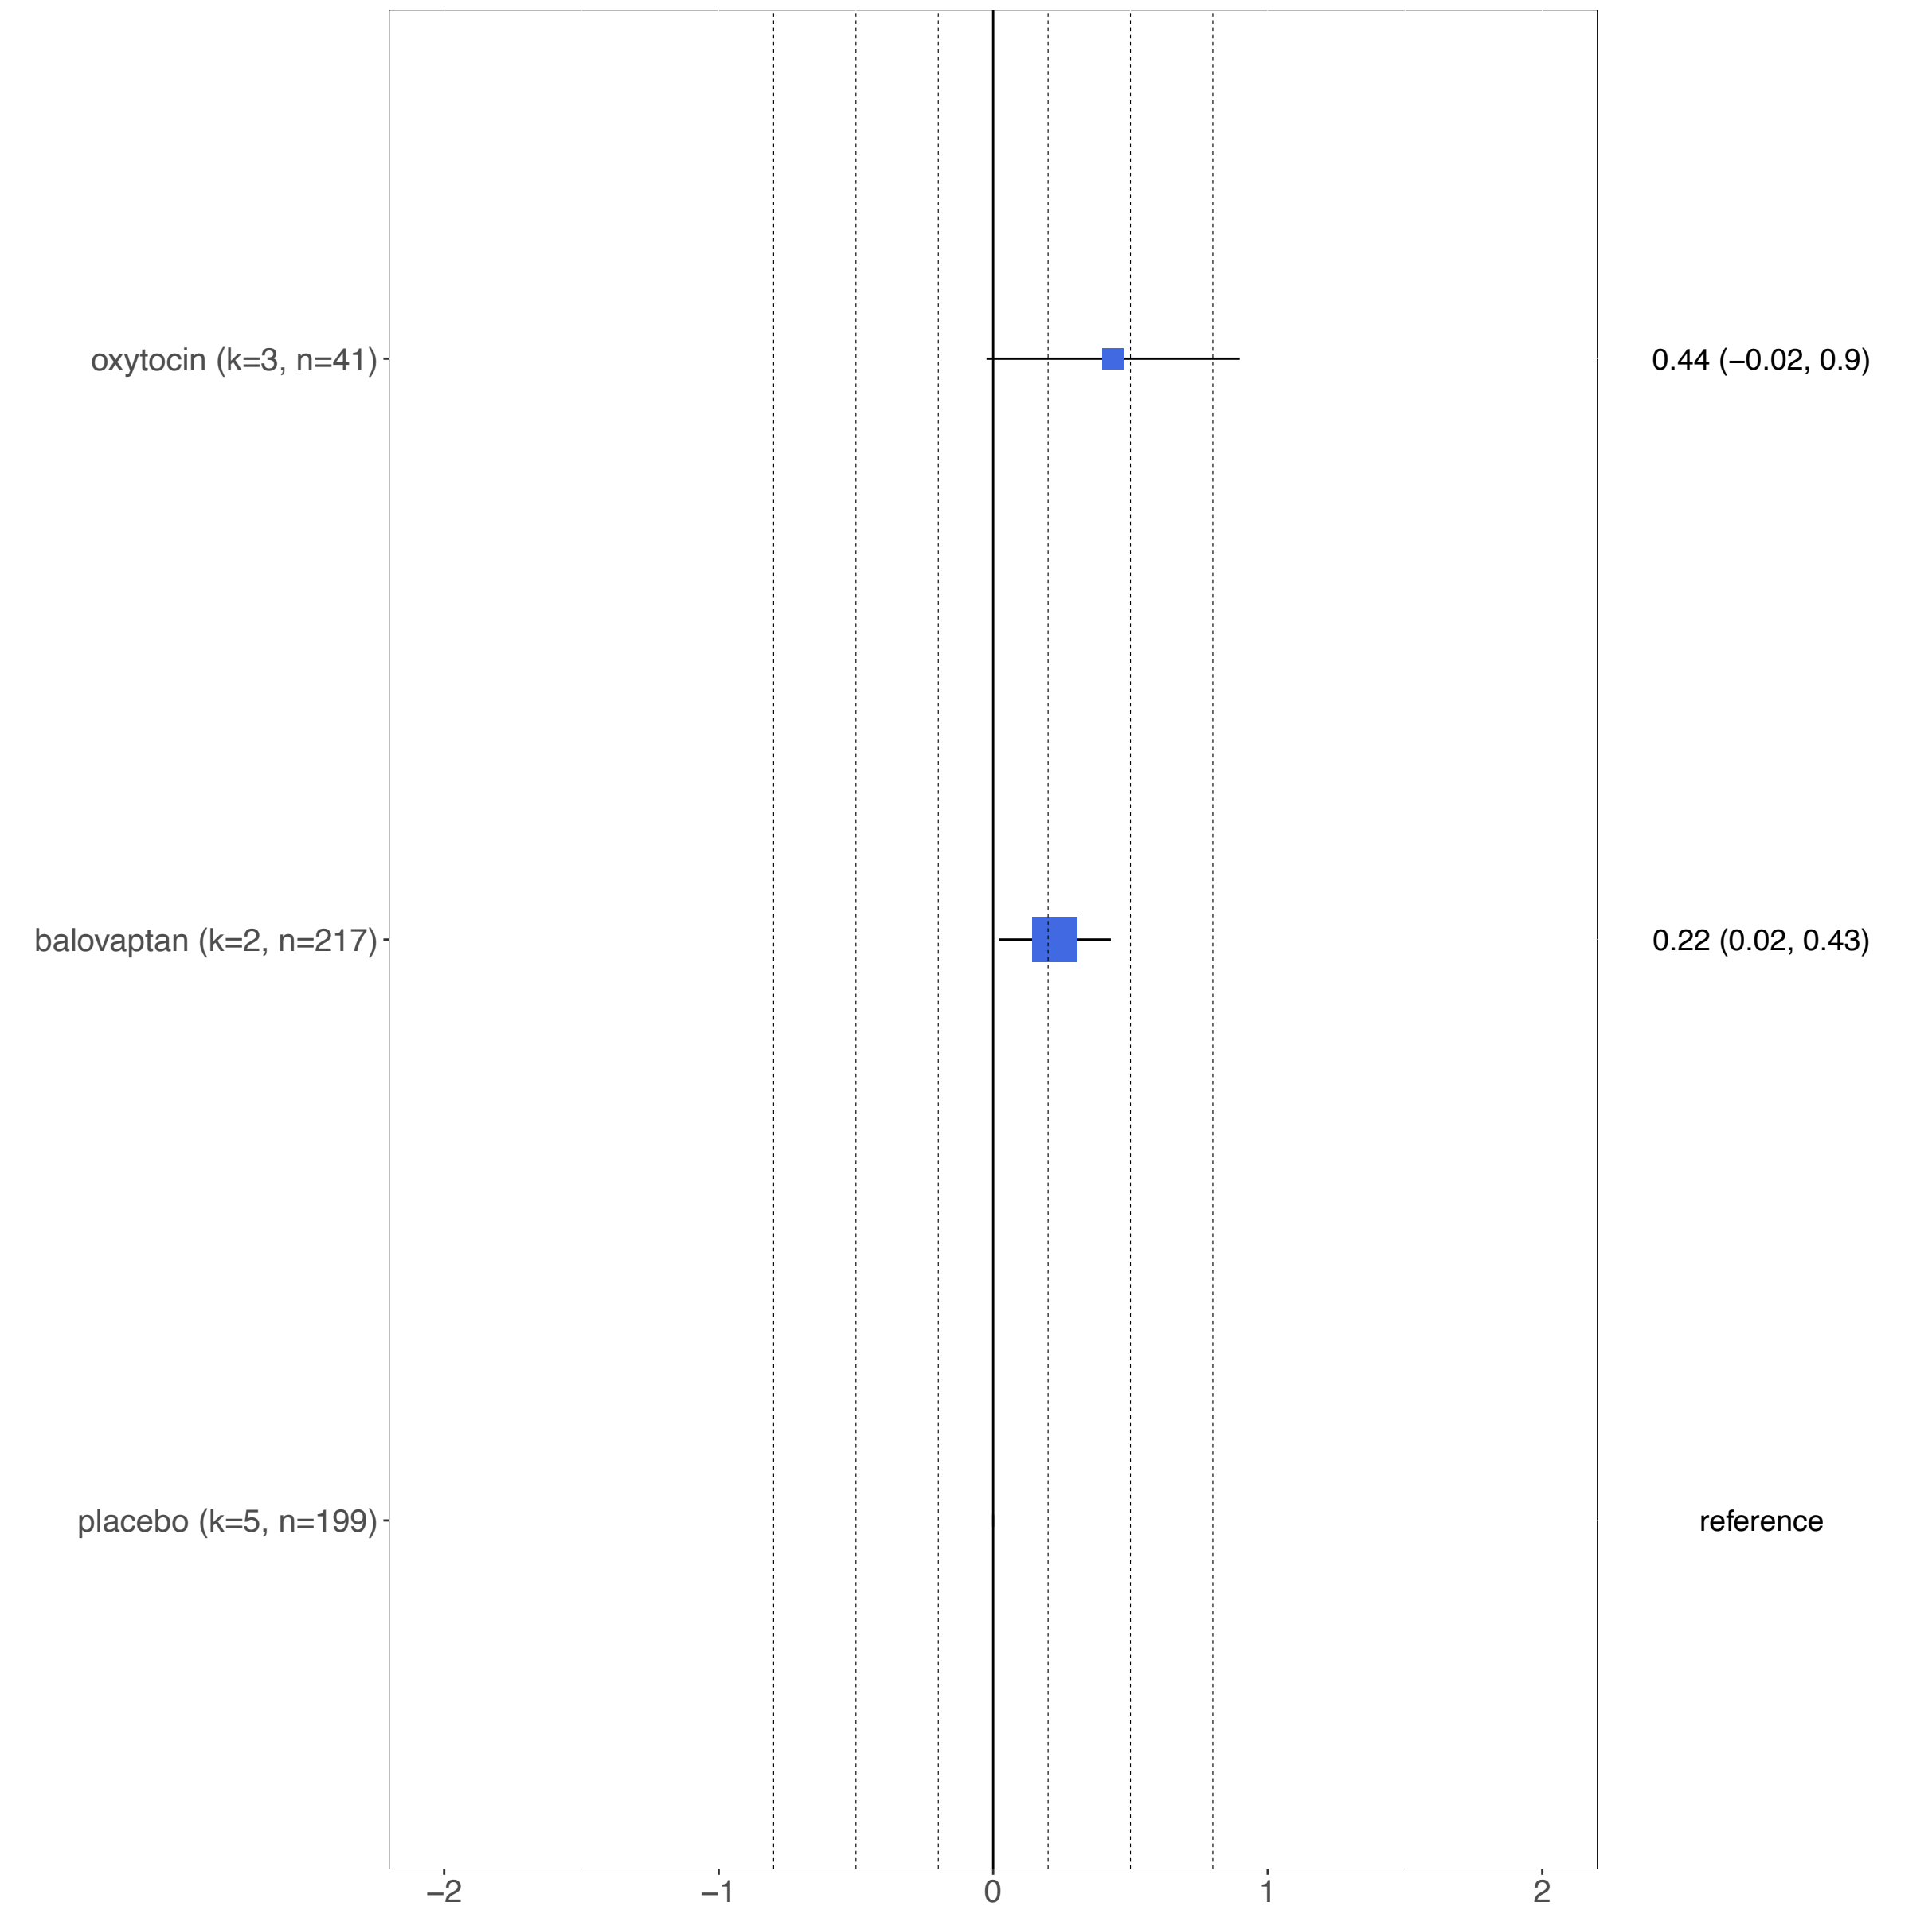

← Worsening      Improvement →

# Response to treatment

## Children/adolescents\*

## Adults

OR 95%CI

OR 95%CI

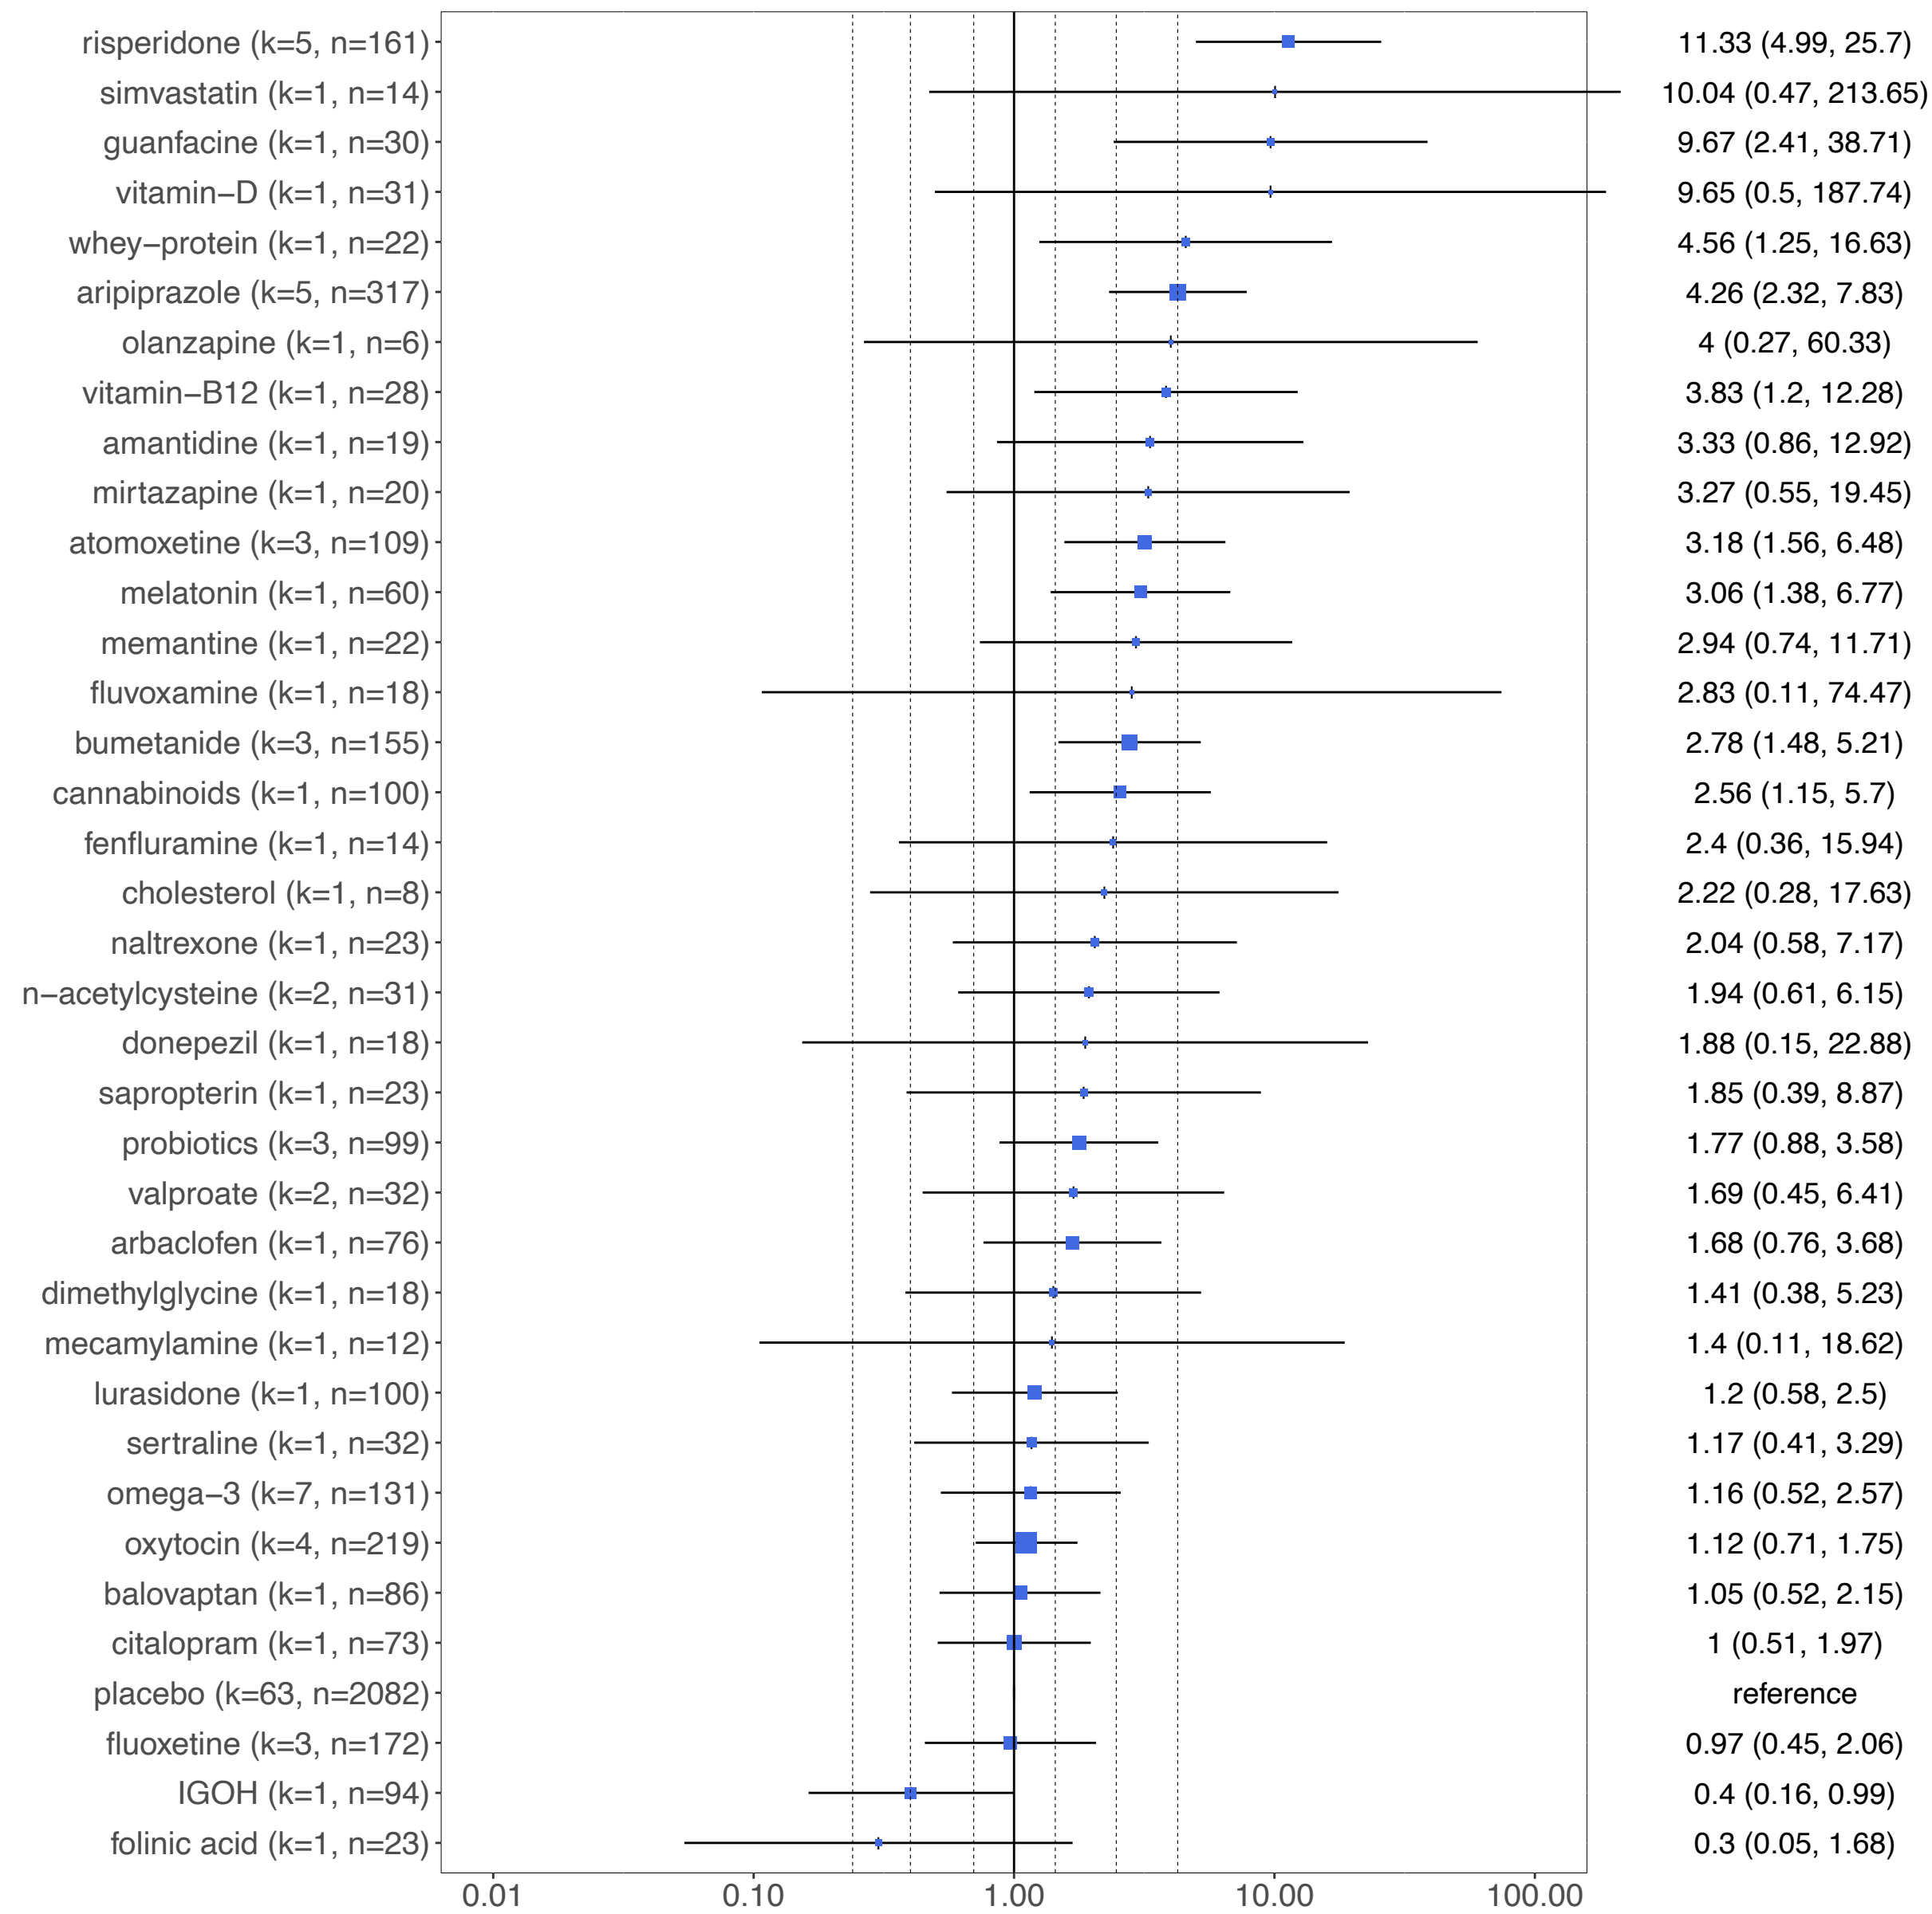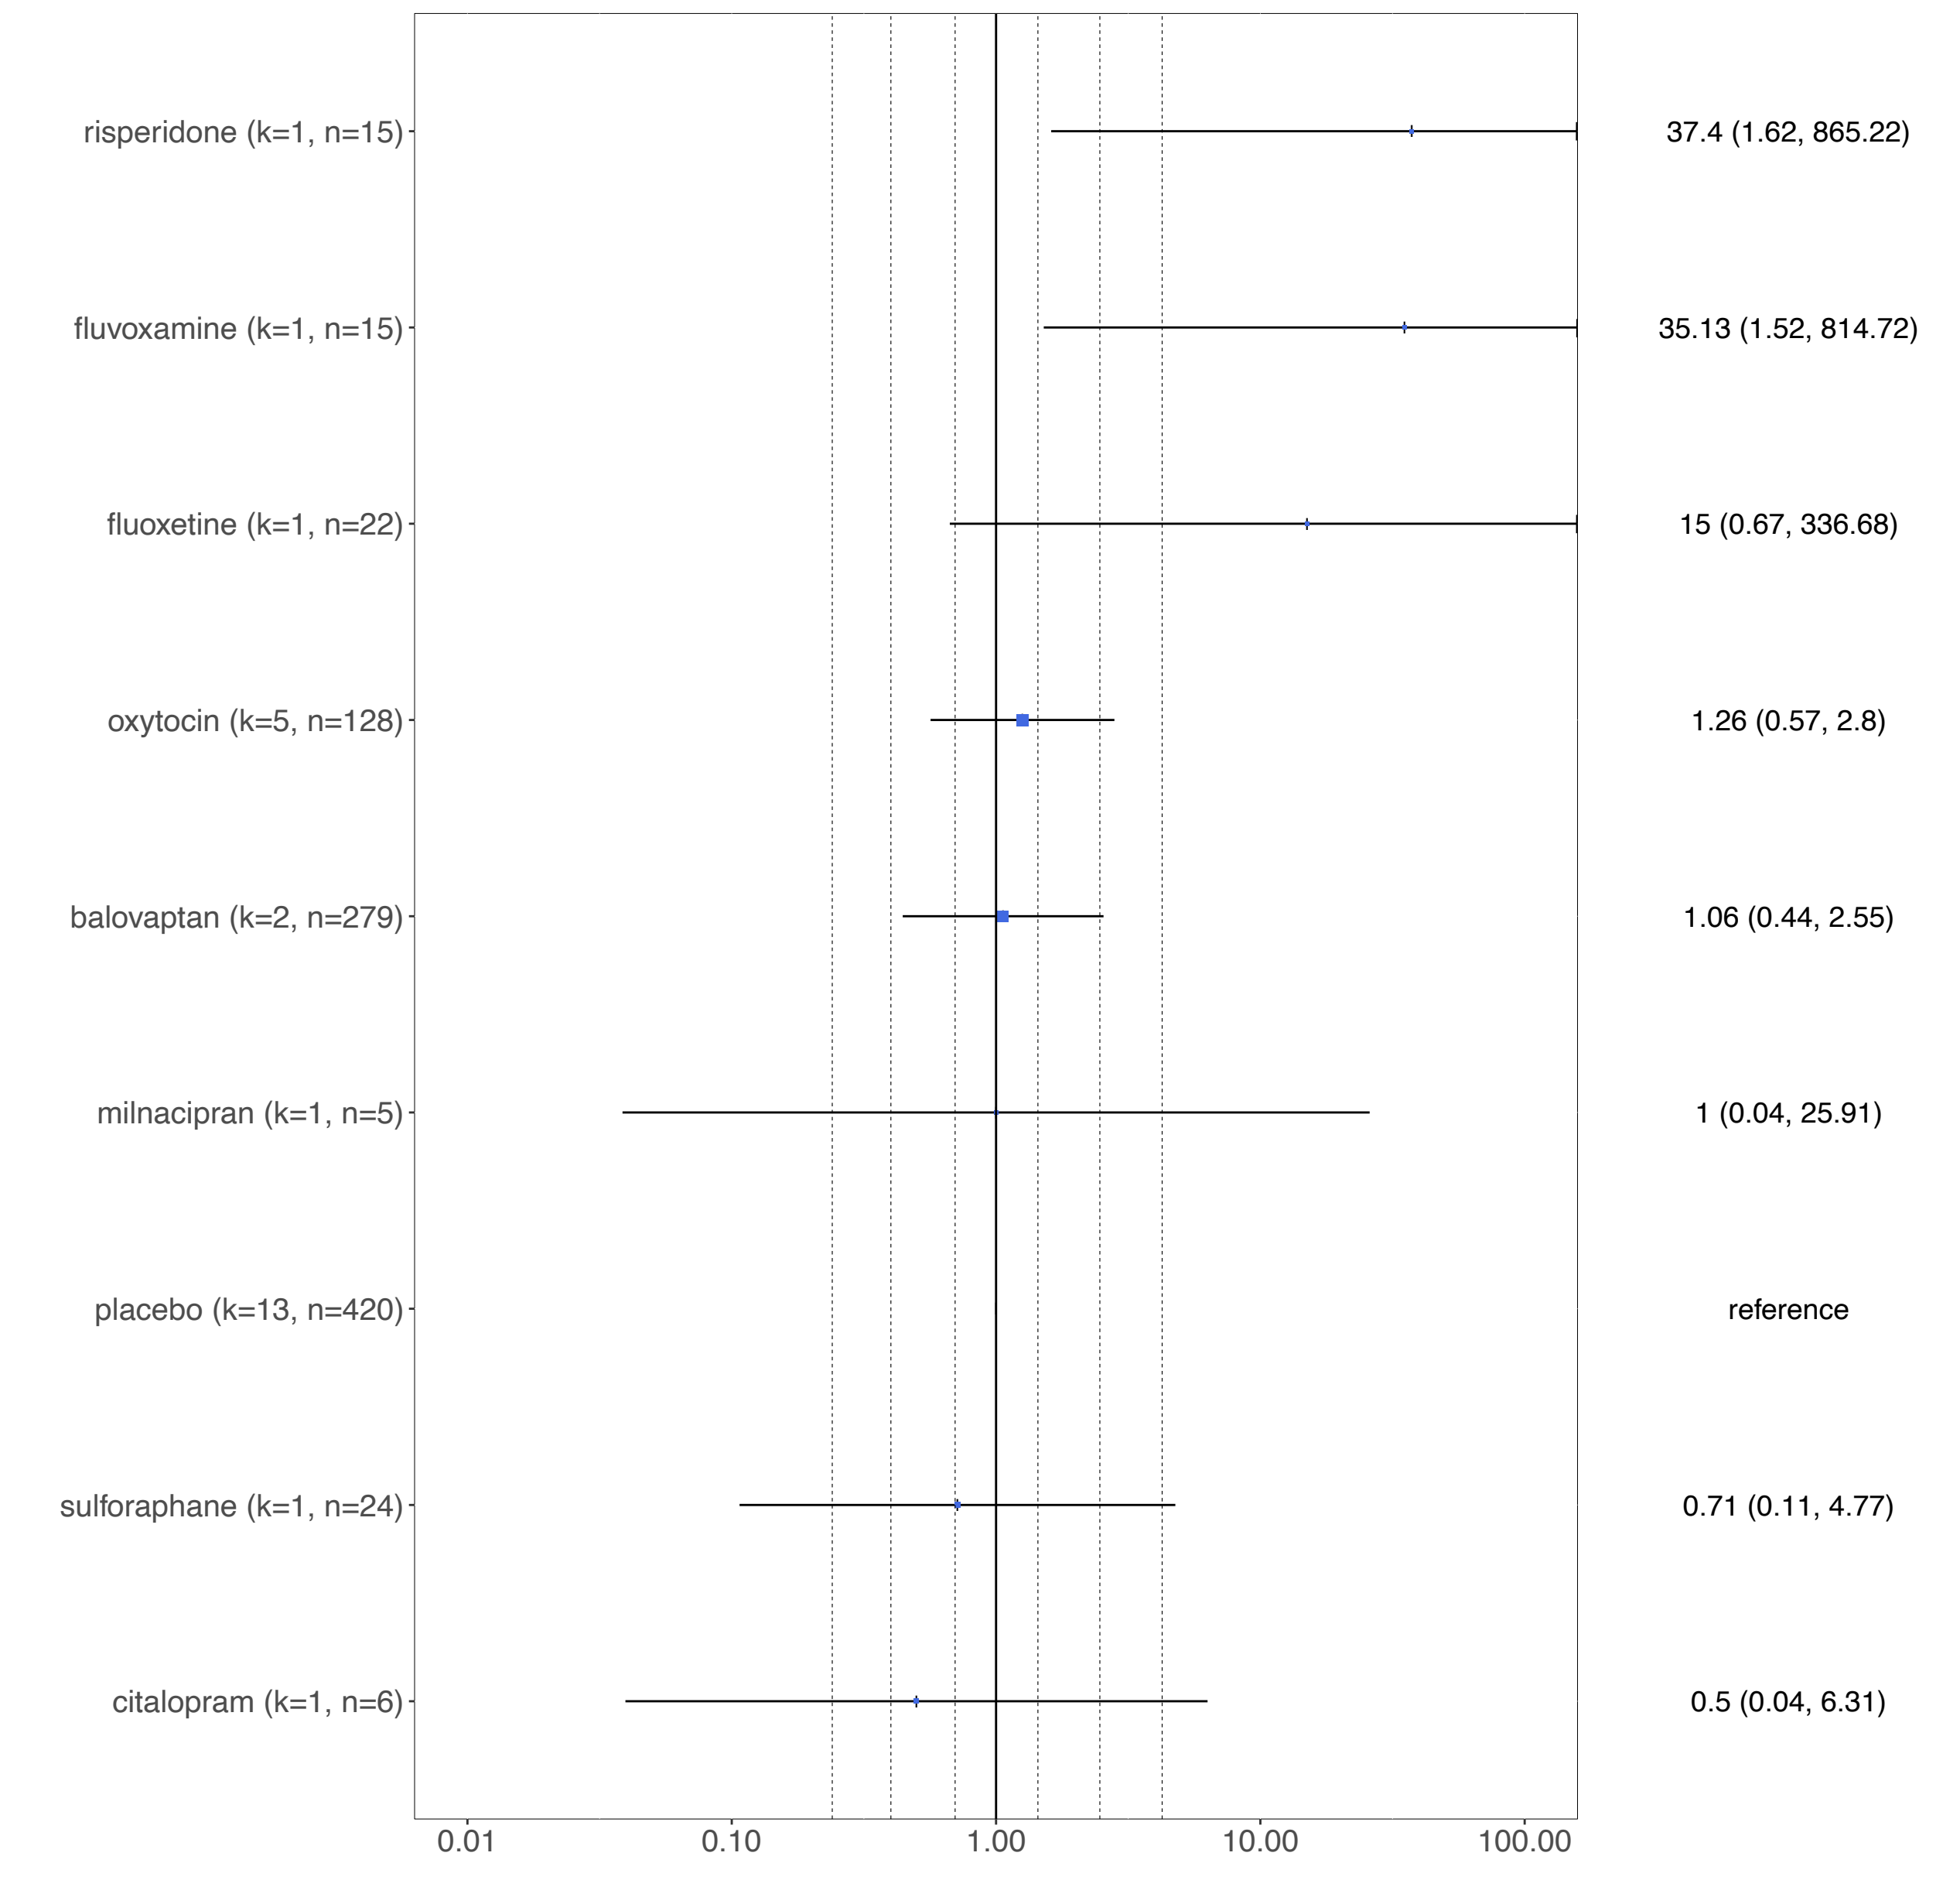

\*pairwise meta-analysis  
due to incoherence

Fewer ← → More

Fewer ← → More

# Dropout due to any reason

## Children/adolescents

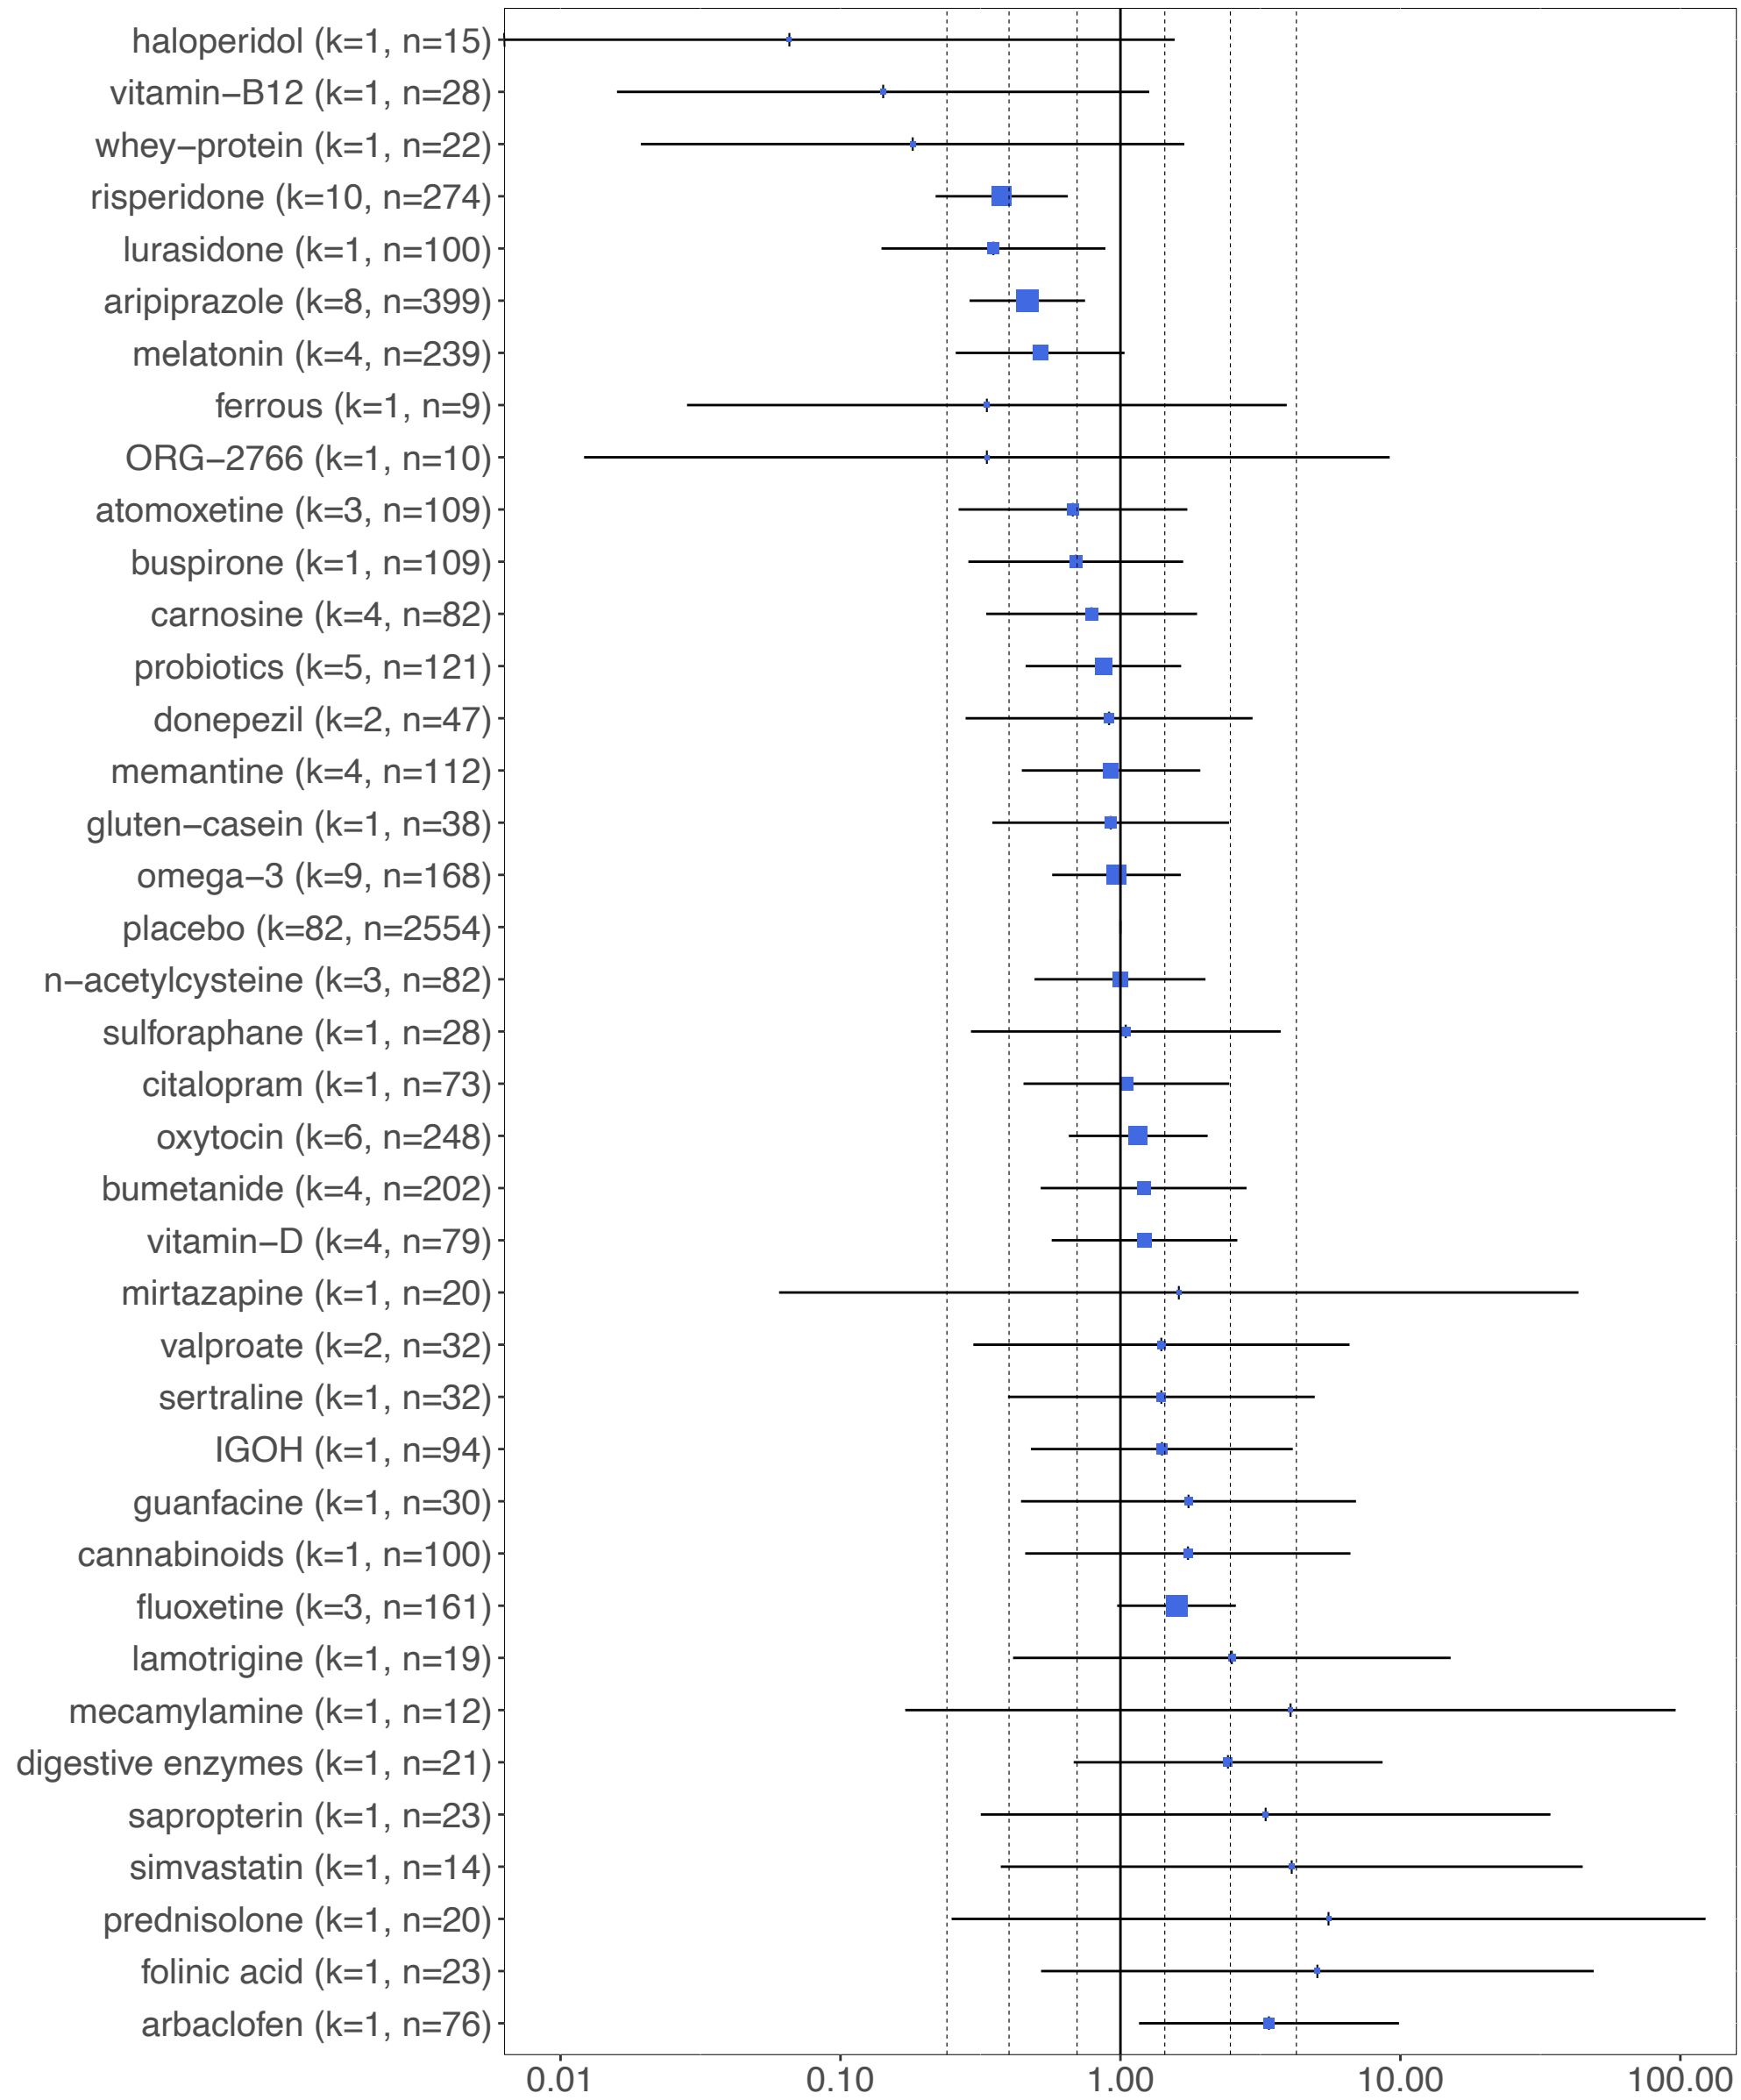

← Fewer → More →

OR 95%CI

0.07 (0, 1.56)  
 0.14 (0.02, 1.27)  
 0.18 (0.02, 1.69)  
 0.38 (0.22, 0.65)  
 0.35 (0.14, 0.88)  
 0.46 (0.29, 0.75)  
 0.52 (0.26, 1.03)  
 0.33 (0.03, 3.93)  
 0.33 (0.01, 9.16)  
 0.68 (0.26, 1.73)  
 0.69 (0.29, 1.68)  
 0.79 (0.33, 1.88)  
 0.87 (0.46, 1.65)  
 0.91 (0.28, 2.96)  
 0.93 (0.44, 1.93)  
 0.92 (0.35, 2.44)  
 0.97 (0.57, 1.64)  
 reference  
 1 (0.49, 2.01)  
 1.05 (0.29, 3.74)  
 1.05 (0.45, 2.45)  
 1.16 (0.65, 2.05)  
 1.21 (0.52, 2.82)  
 1.22 (0.57, 2.62)  
 1.62 (0.06, 43.25)  
 1.4 (0.3, 6.58)  
 1.4 (0.4, 4.94)  
 1.41 (0.48, 4.13)  
 1.75 (0.44, 6.94)  
 1.74 (0.46, 6.63)  
 1.59 (0.97, 2.58)  
 2.5 (0.41, 15.12)  
 4.05 (0.17, 96.19)  
 2.42 (0.68, 8.64)  
 3.3 (0.32, 34.36)  
 4.09 (0.37, 44.79)  
 5.54 (0.25, 123.09)  
 5.05 (0.52, 49.03)  
 3.39 (1.16, 9.88)

## Adults

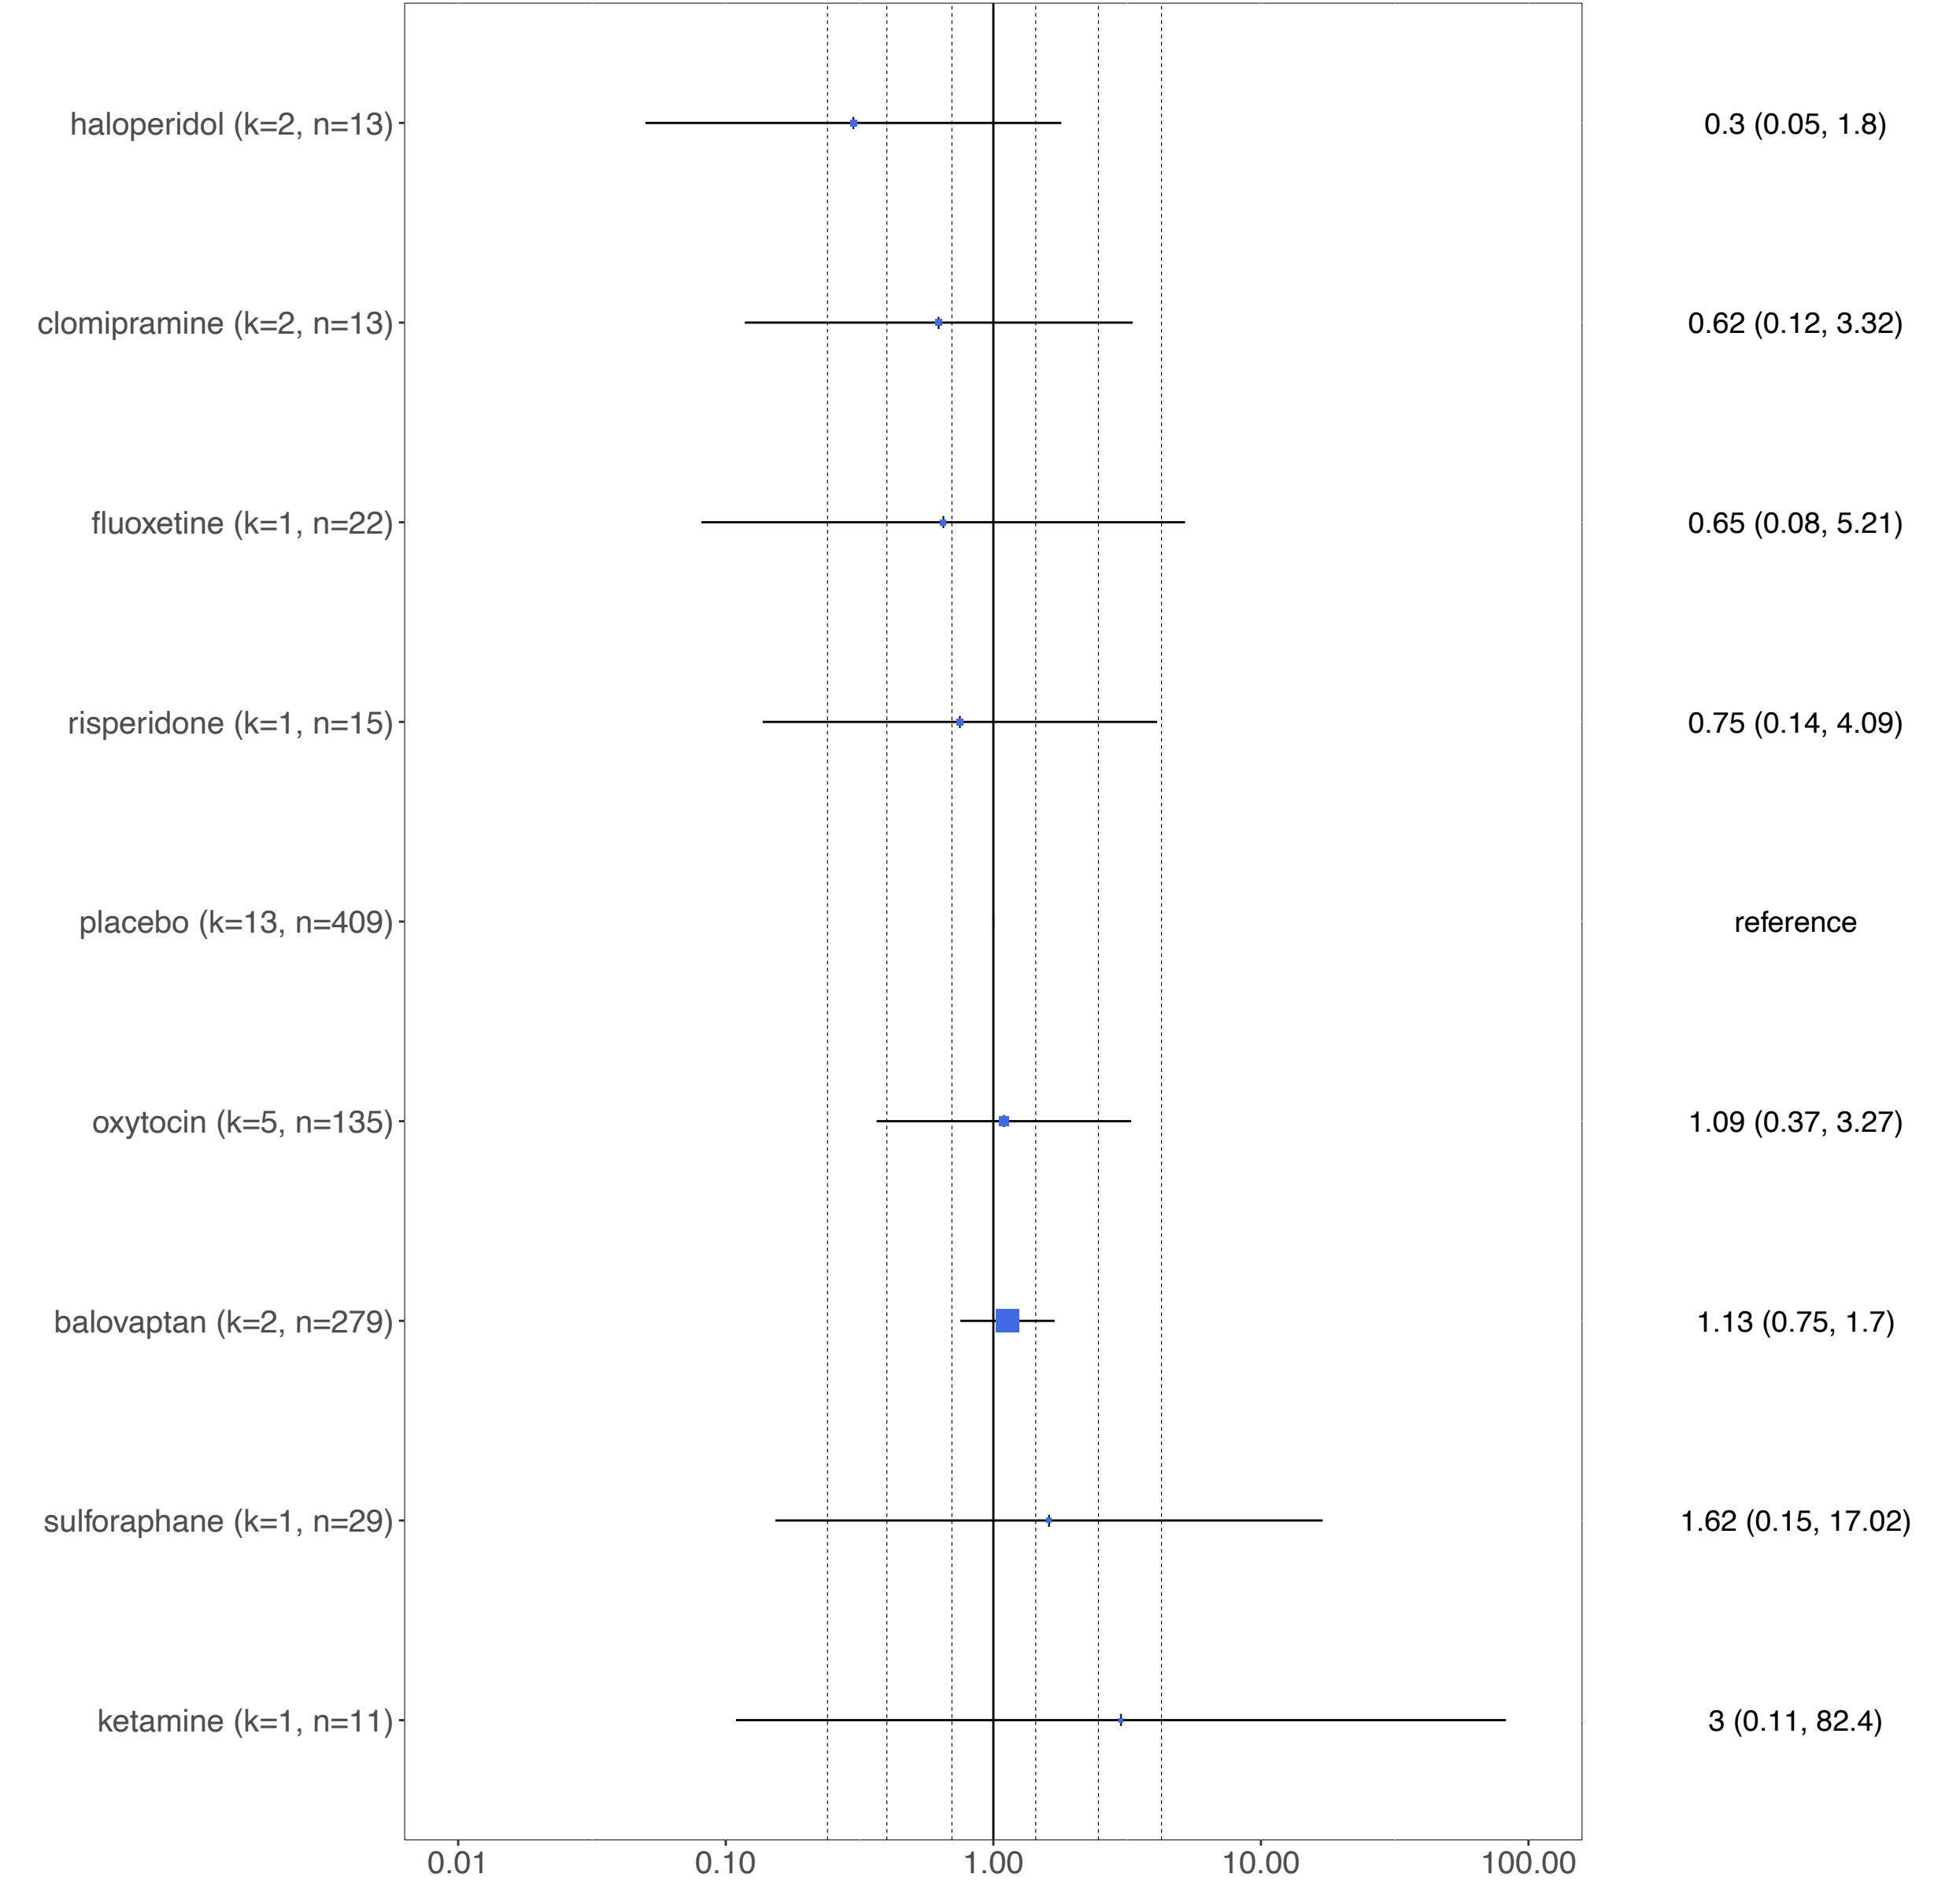

← Fewer → More →

OR 95%CI

0.3 (0.05, 1.8)  
 0.62 (0.12, 3.32)  
 0.65 (0.08, 5.21)  
 0.75 (0.14, 4.09)  
 reference  
 1.09 (0.37, 3.27)  
 1.13 (0.75, 1.7)  
 1.62 (0.15, 17.02)  
 3 (0.11, 82.4)



# Dropout due to adverse event

## Children/adolescents

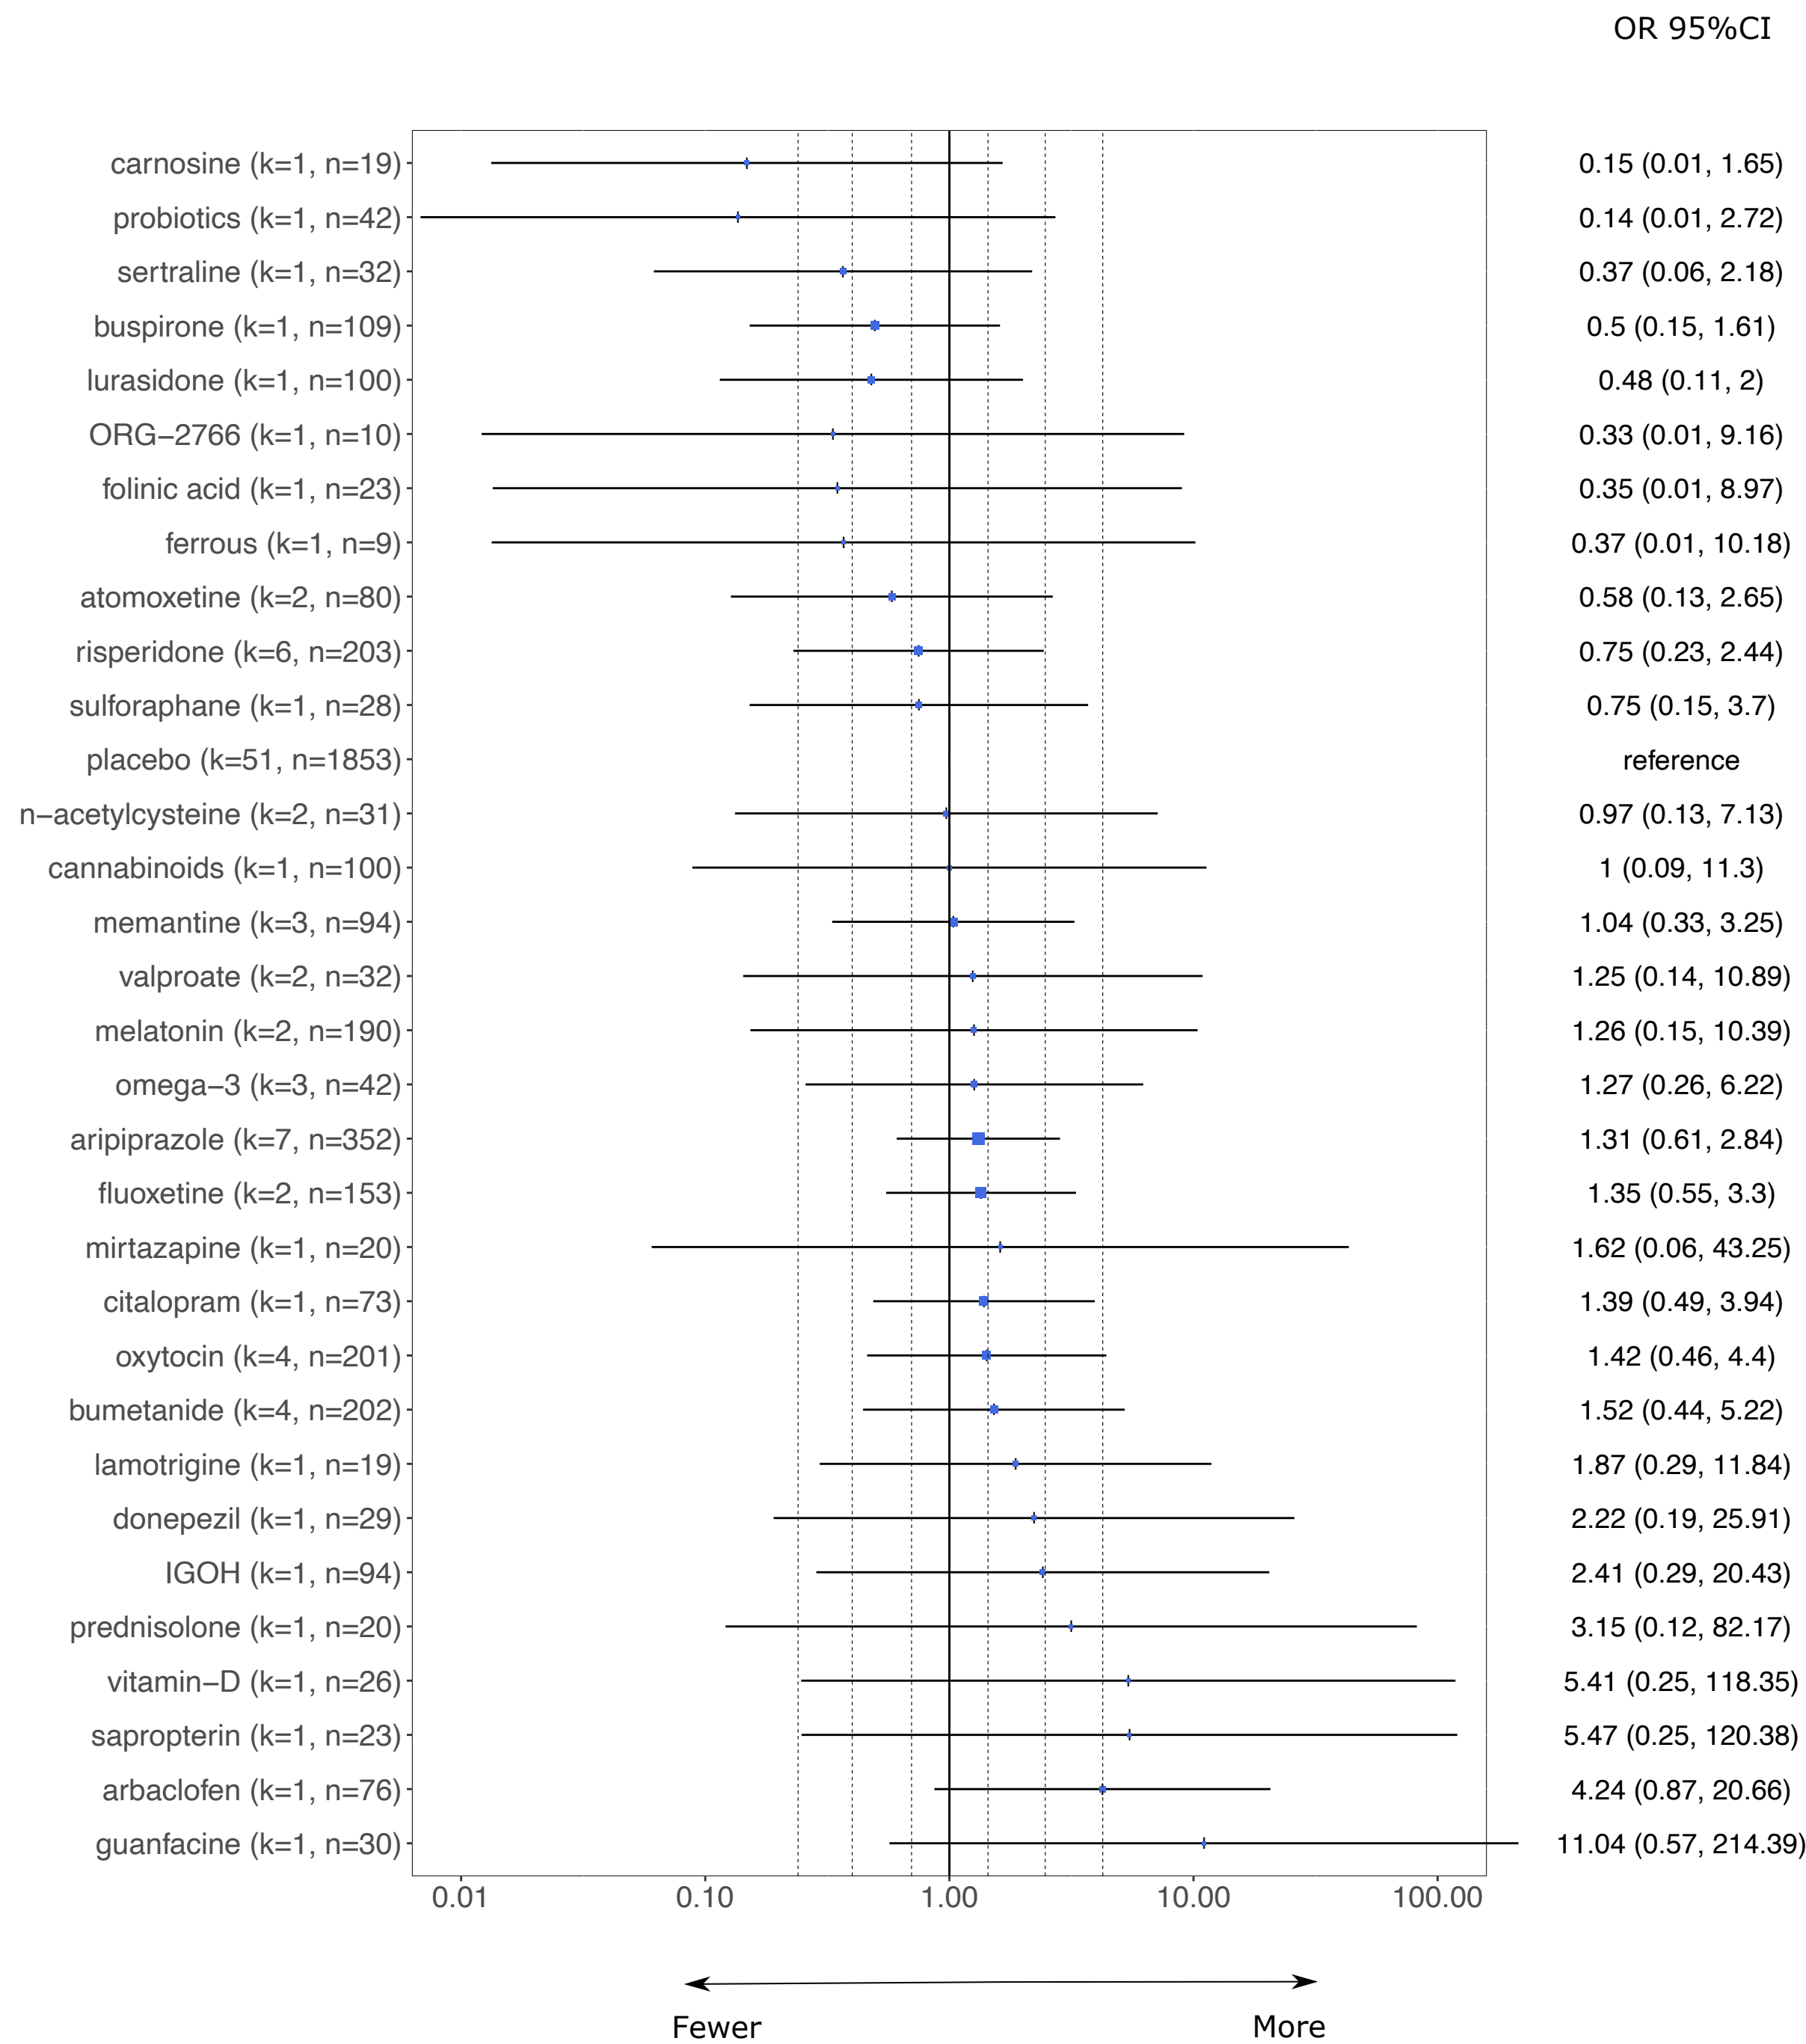

## Adults

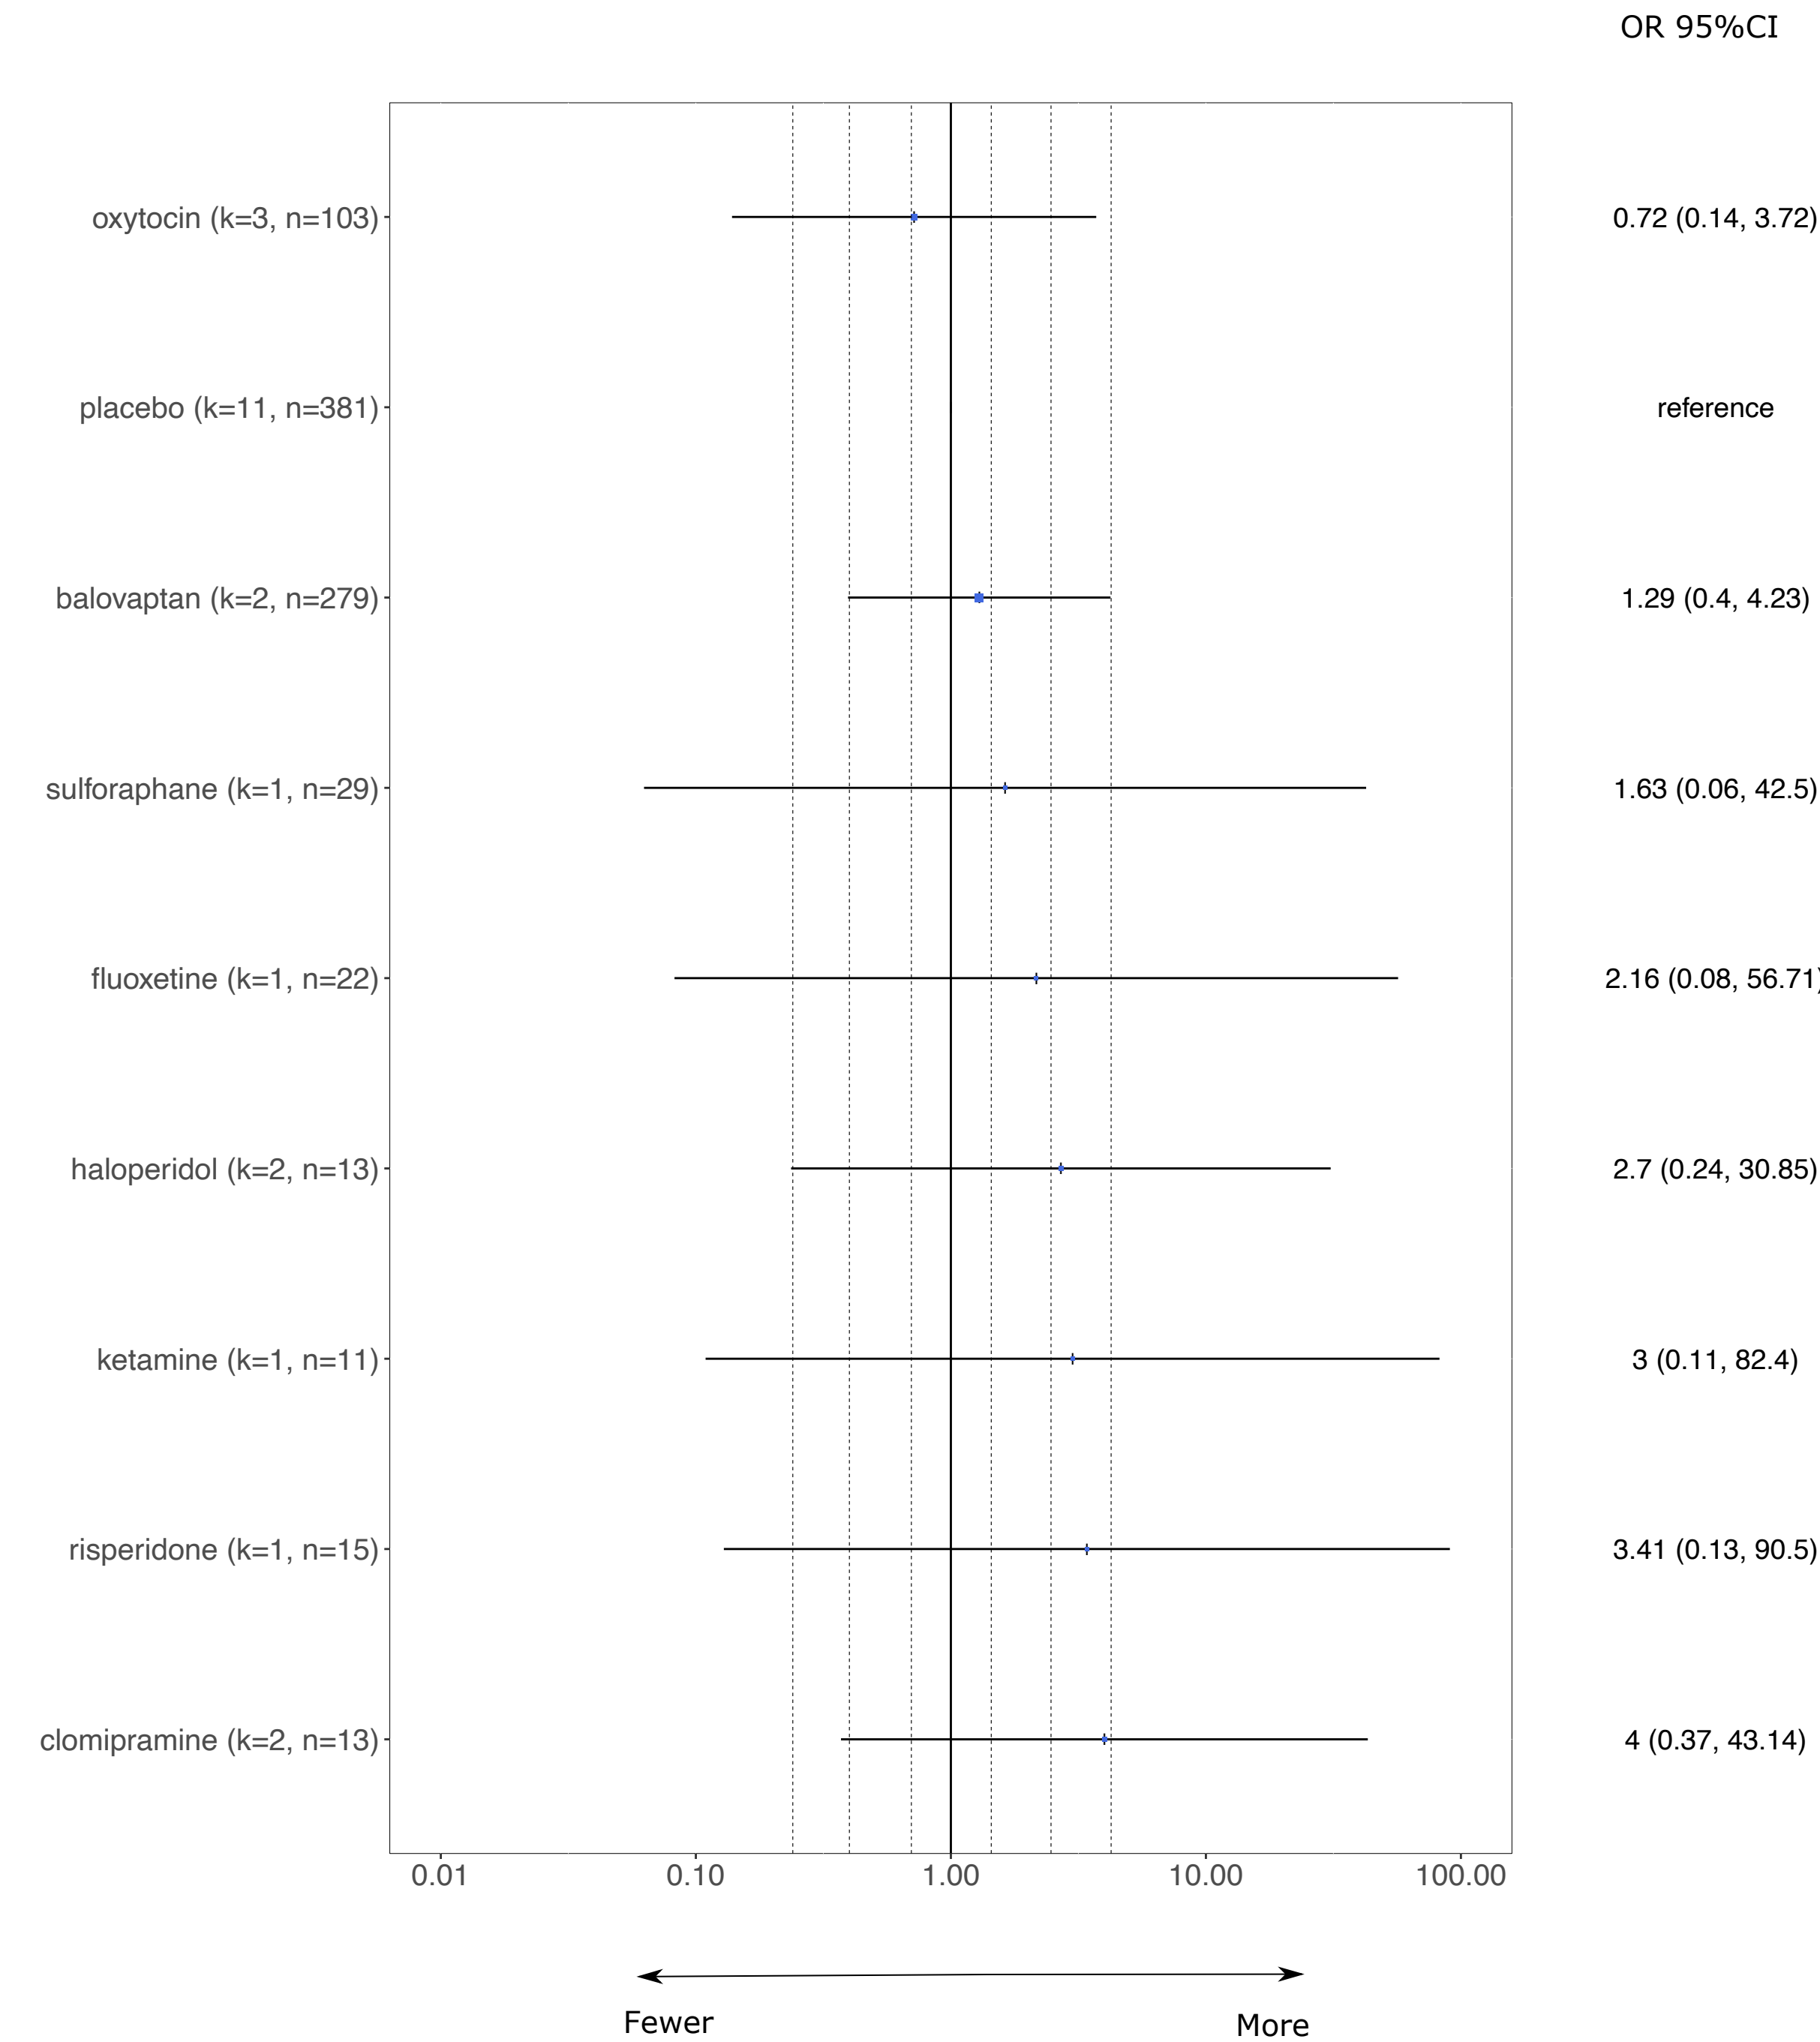

← Fewer More →

← Fewer More →



# Sedation

## Children/adolescents\*

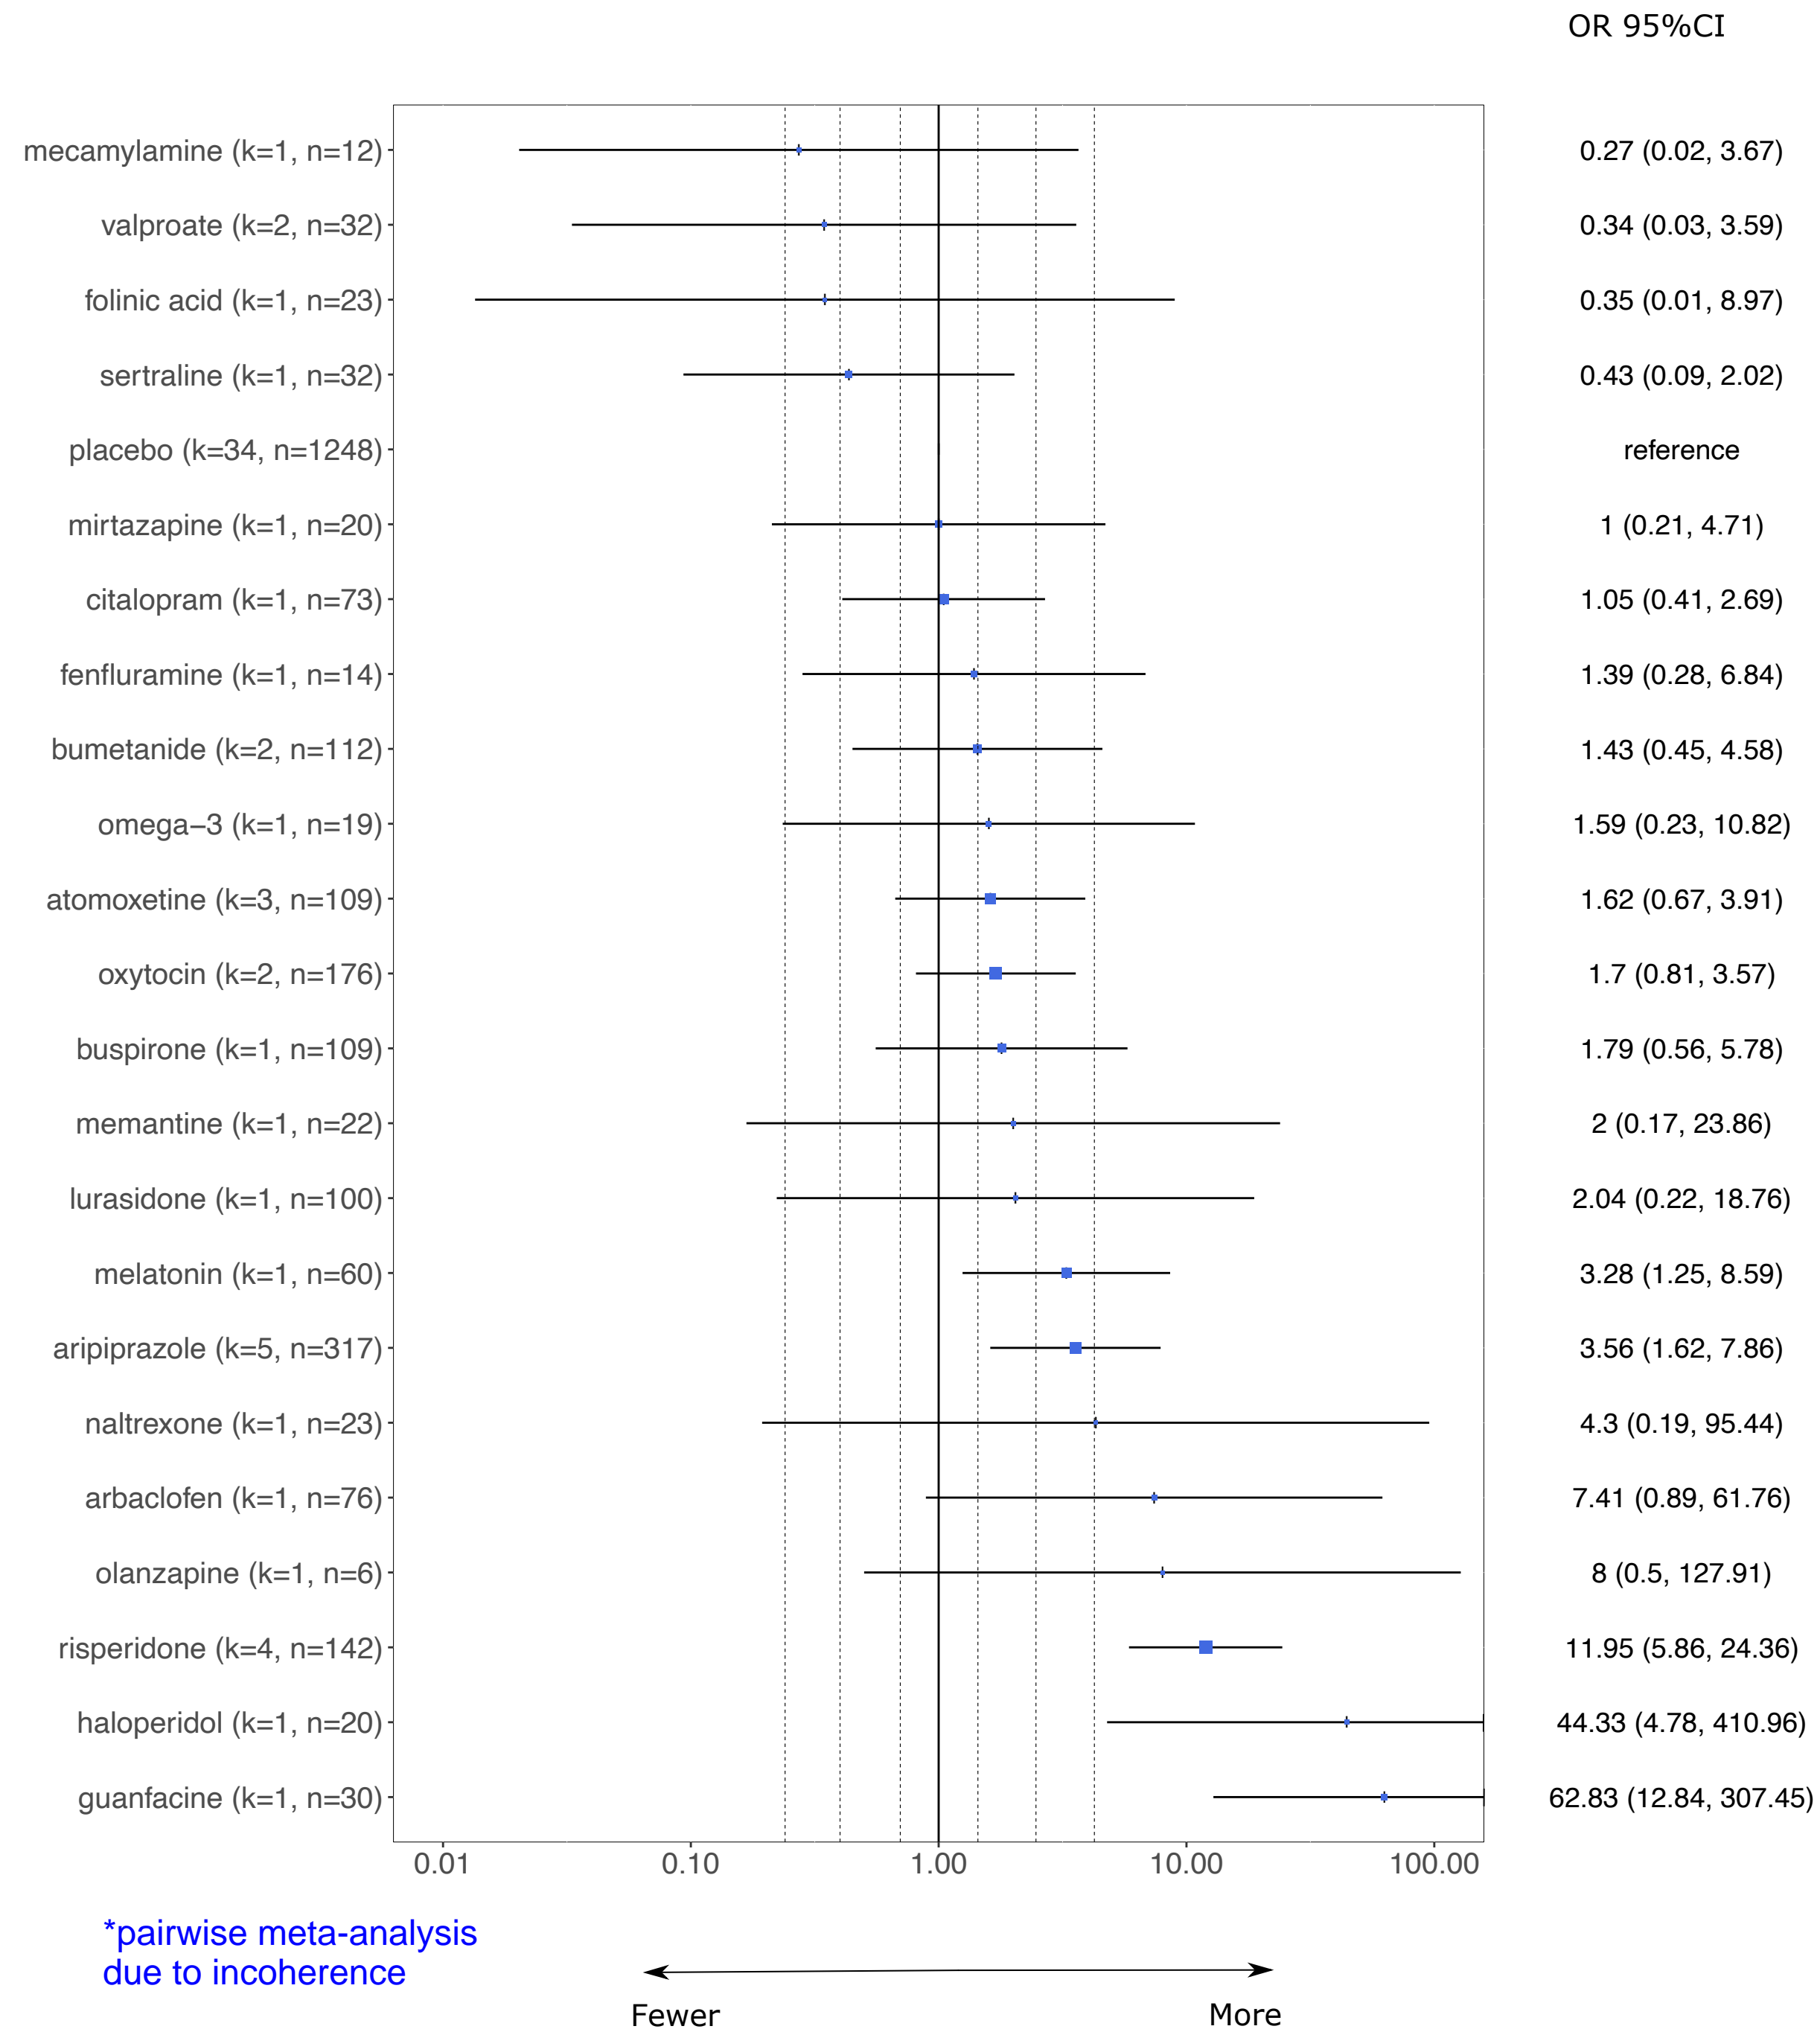

## Adults

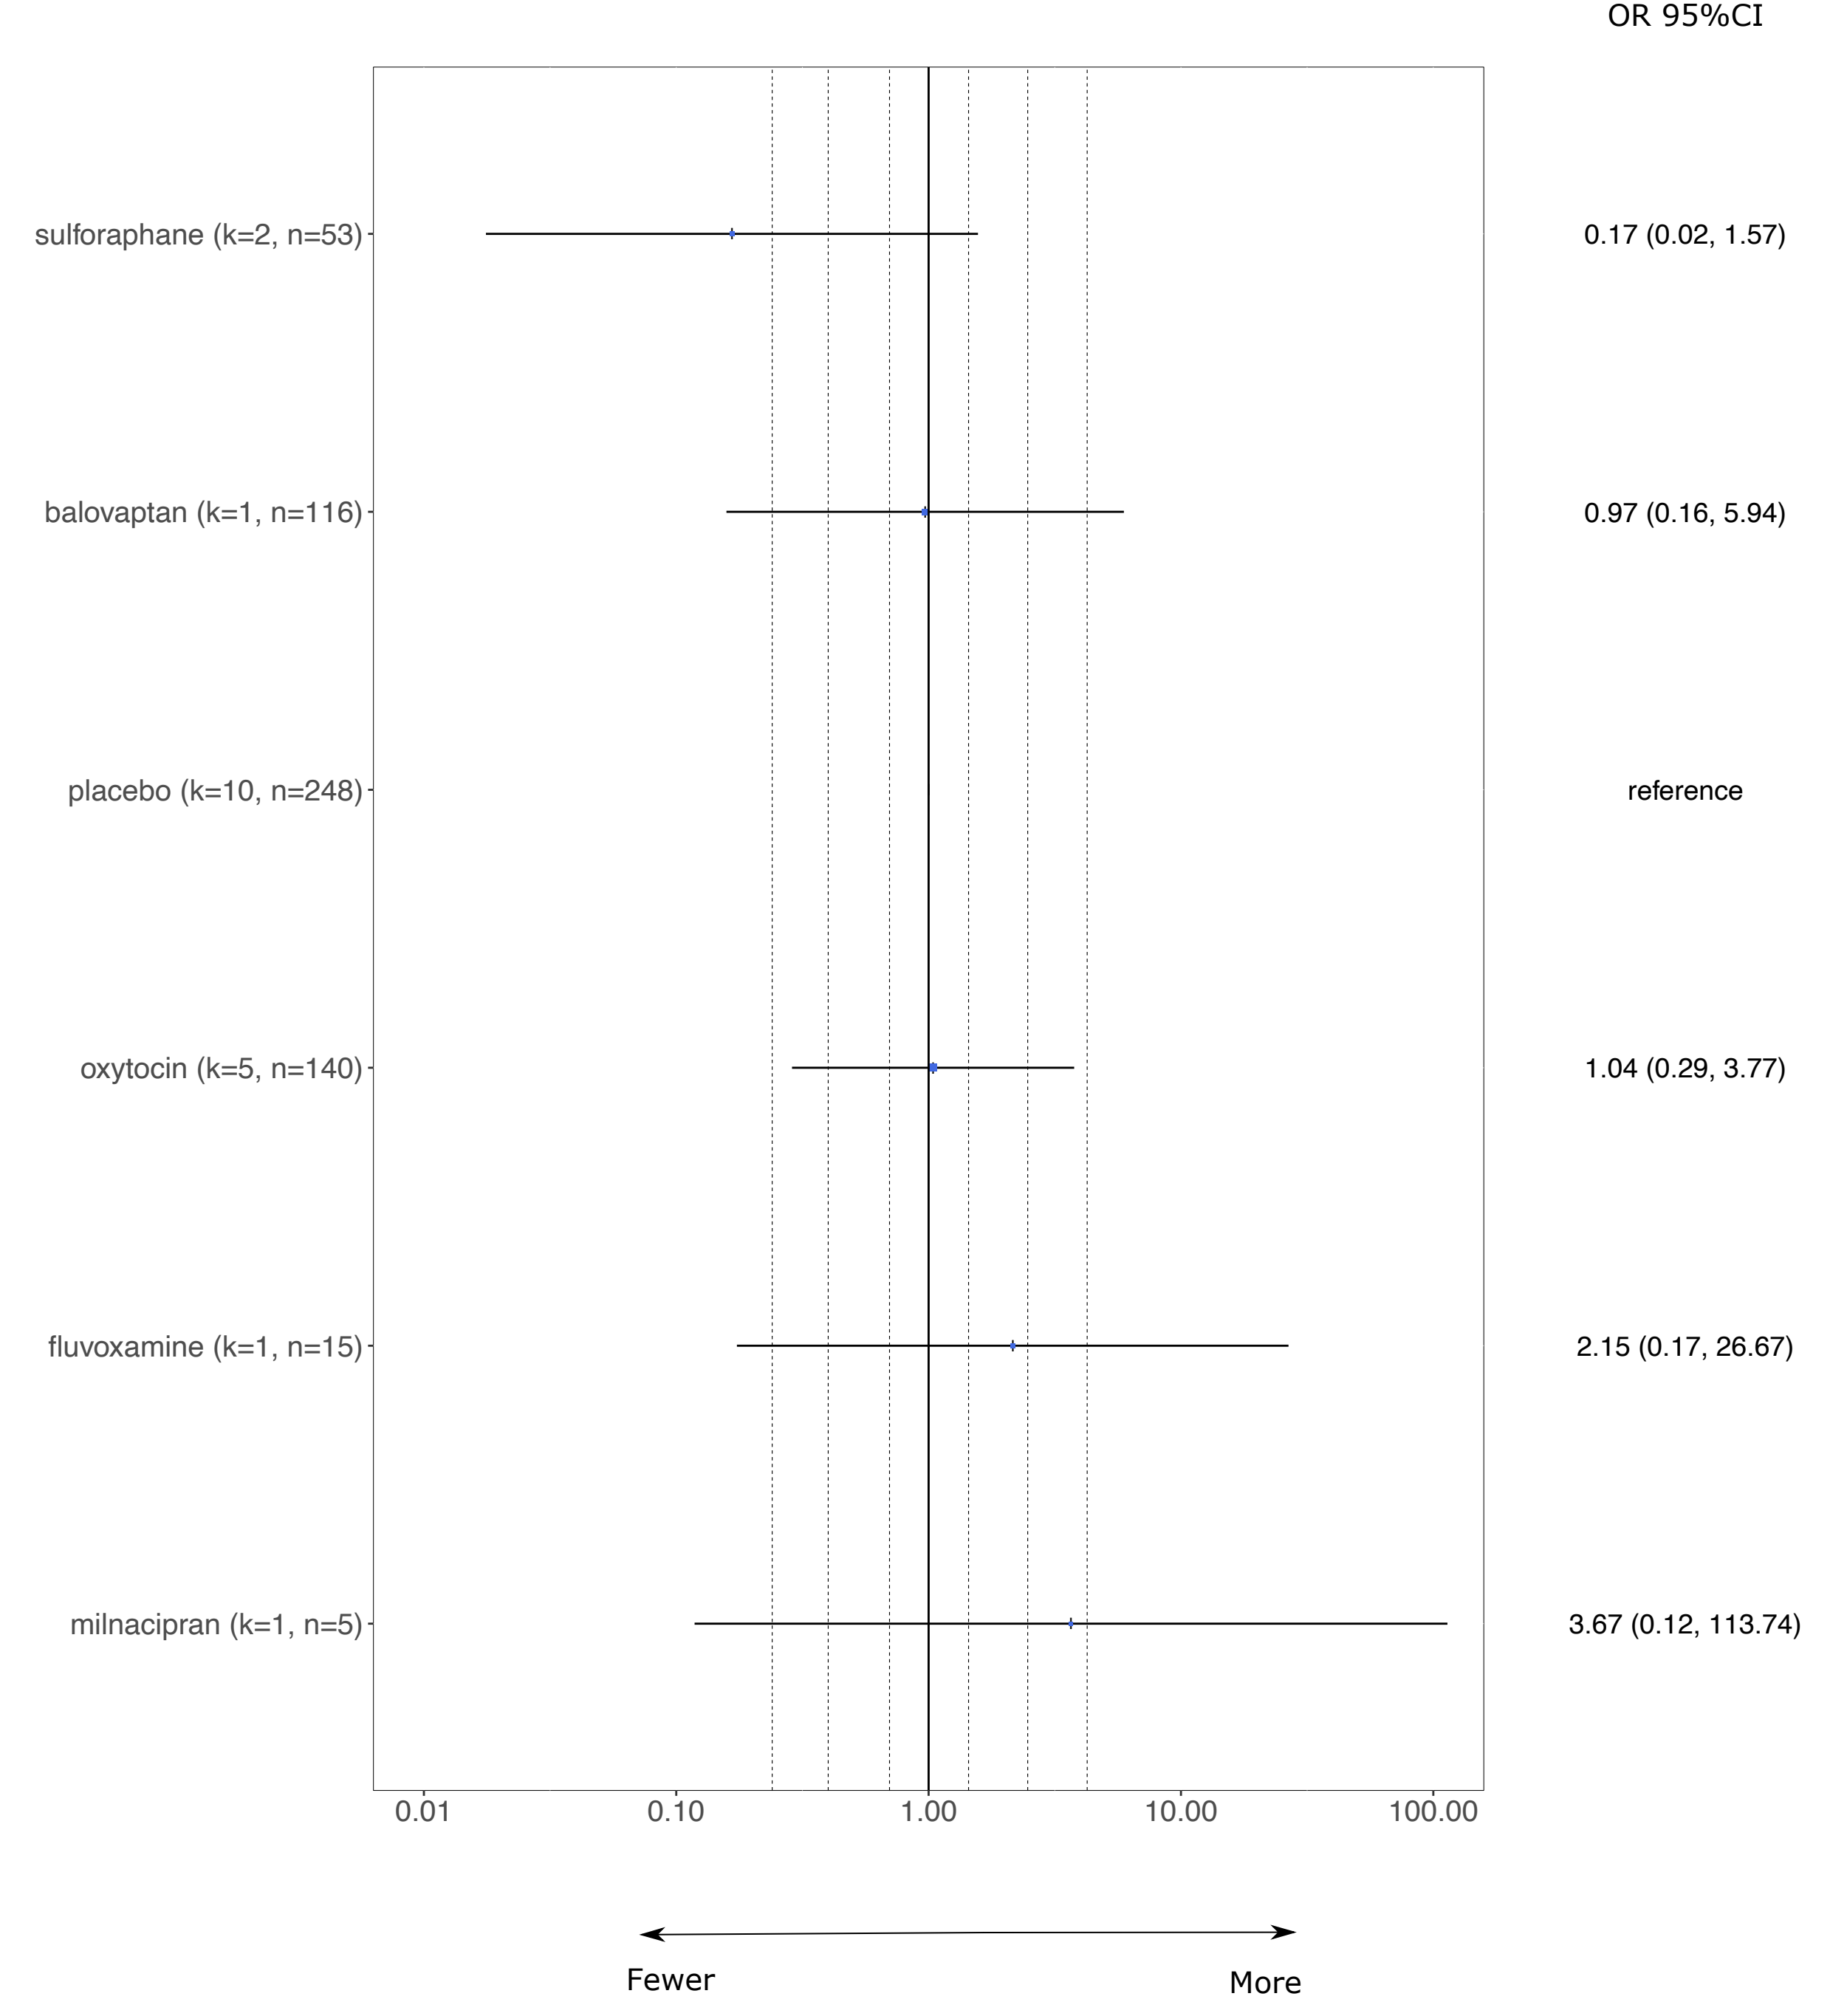

# Weight gain

## Children/adolescents \*

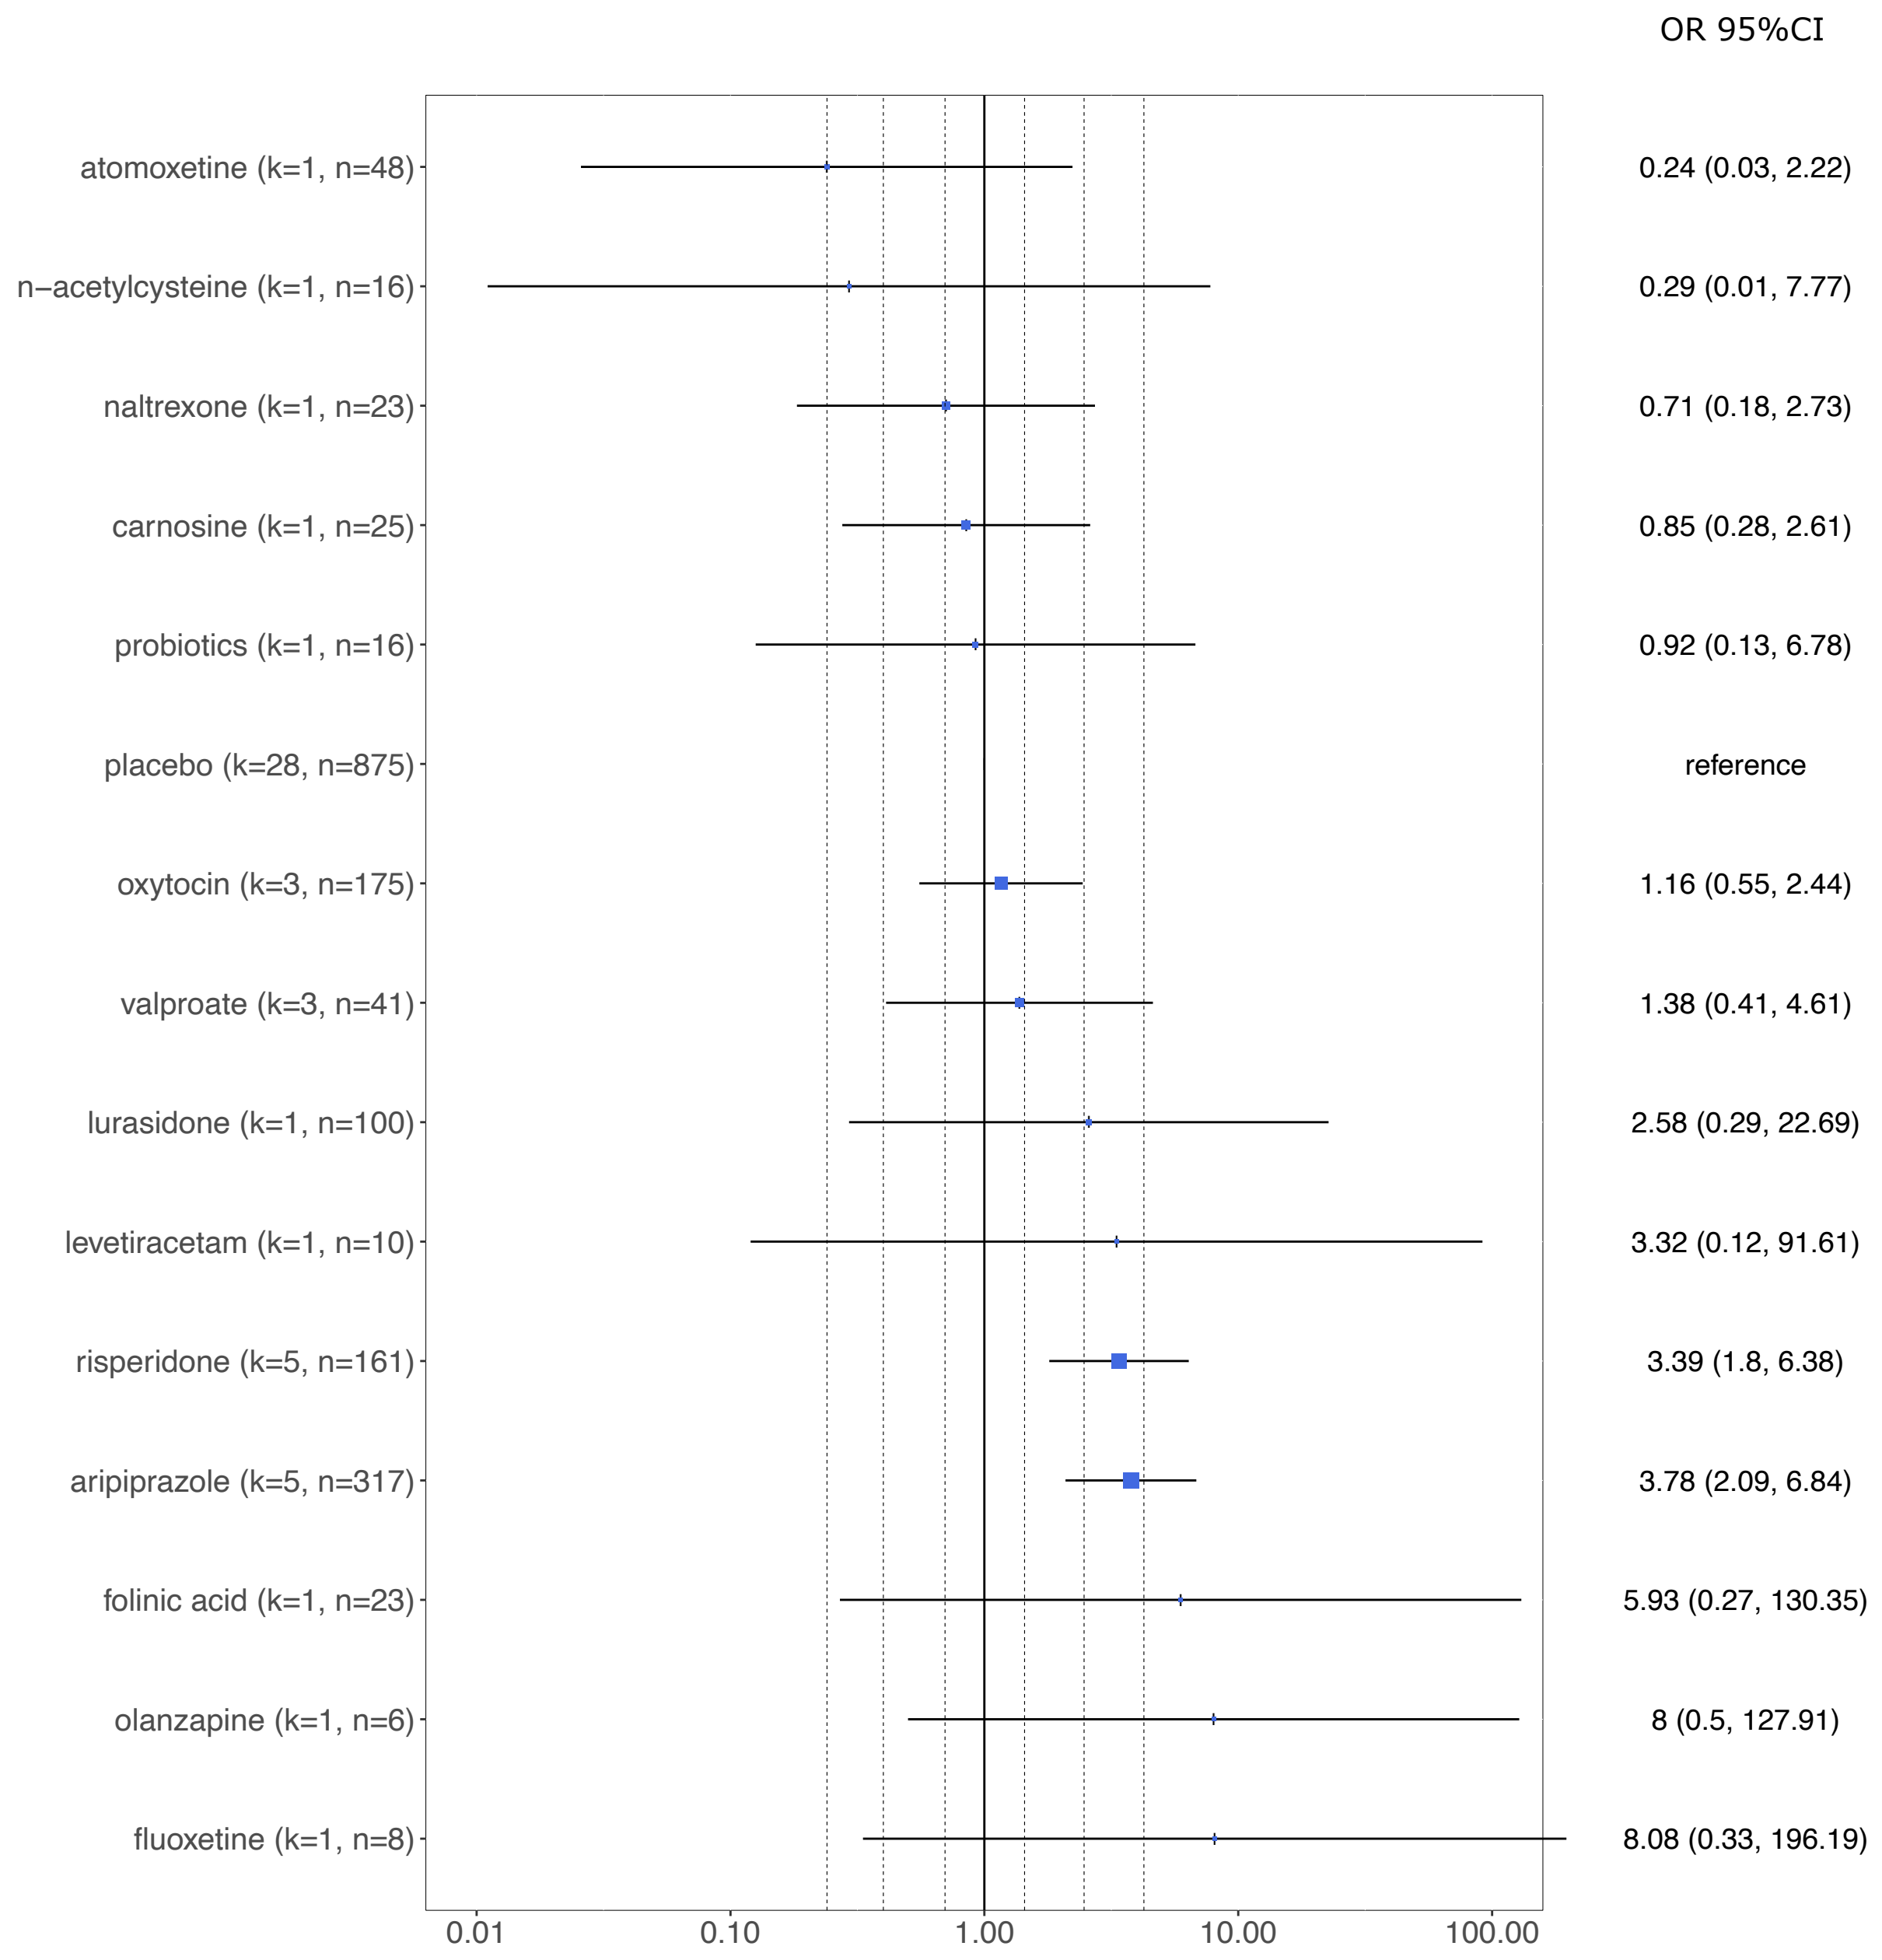

\*pairwise meta-analysis due to incoherence

Fewer ← → More

## Adults

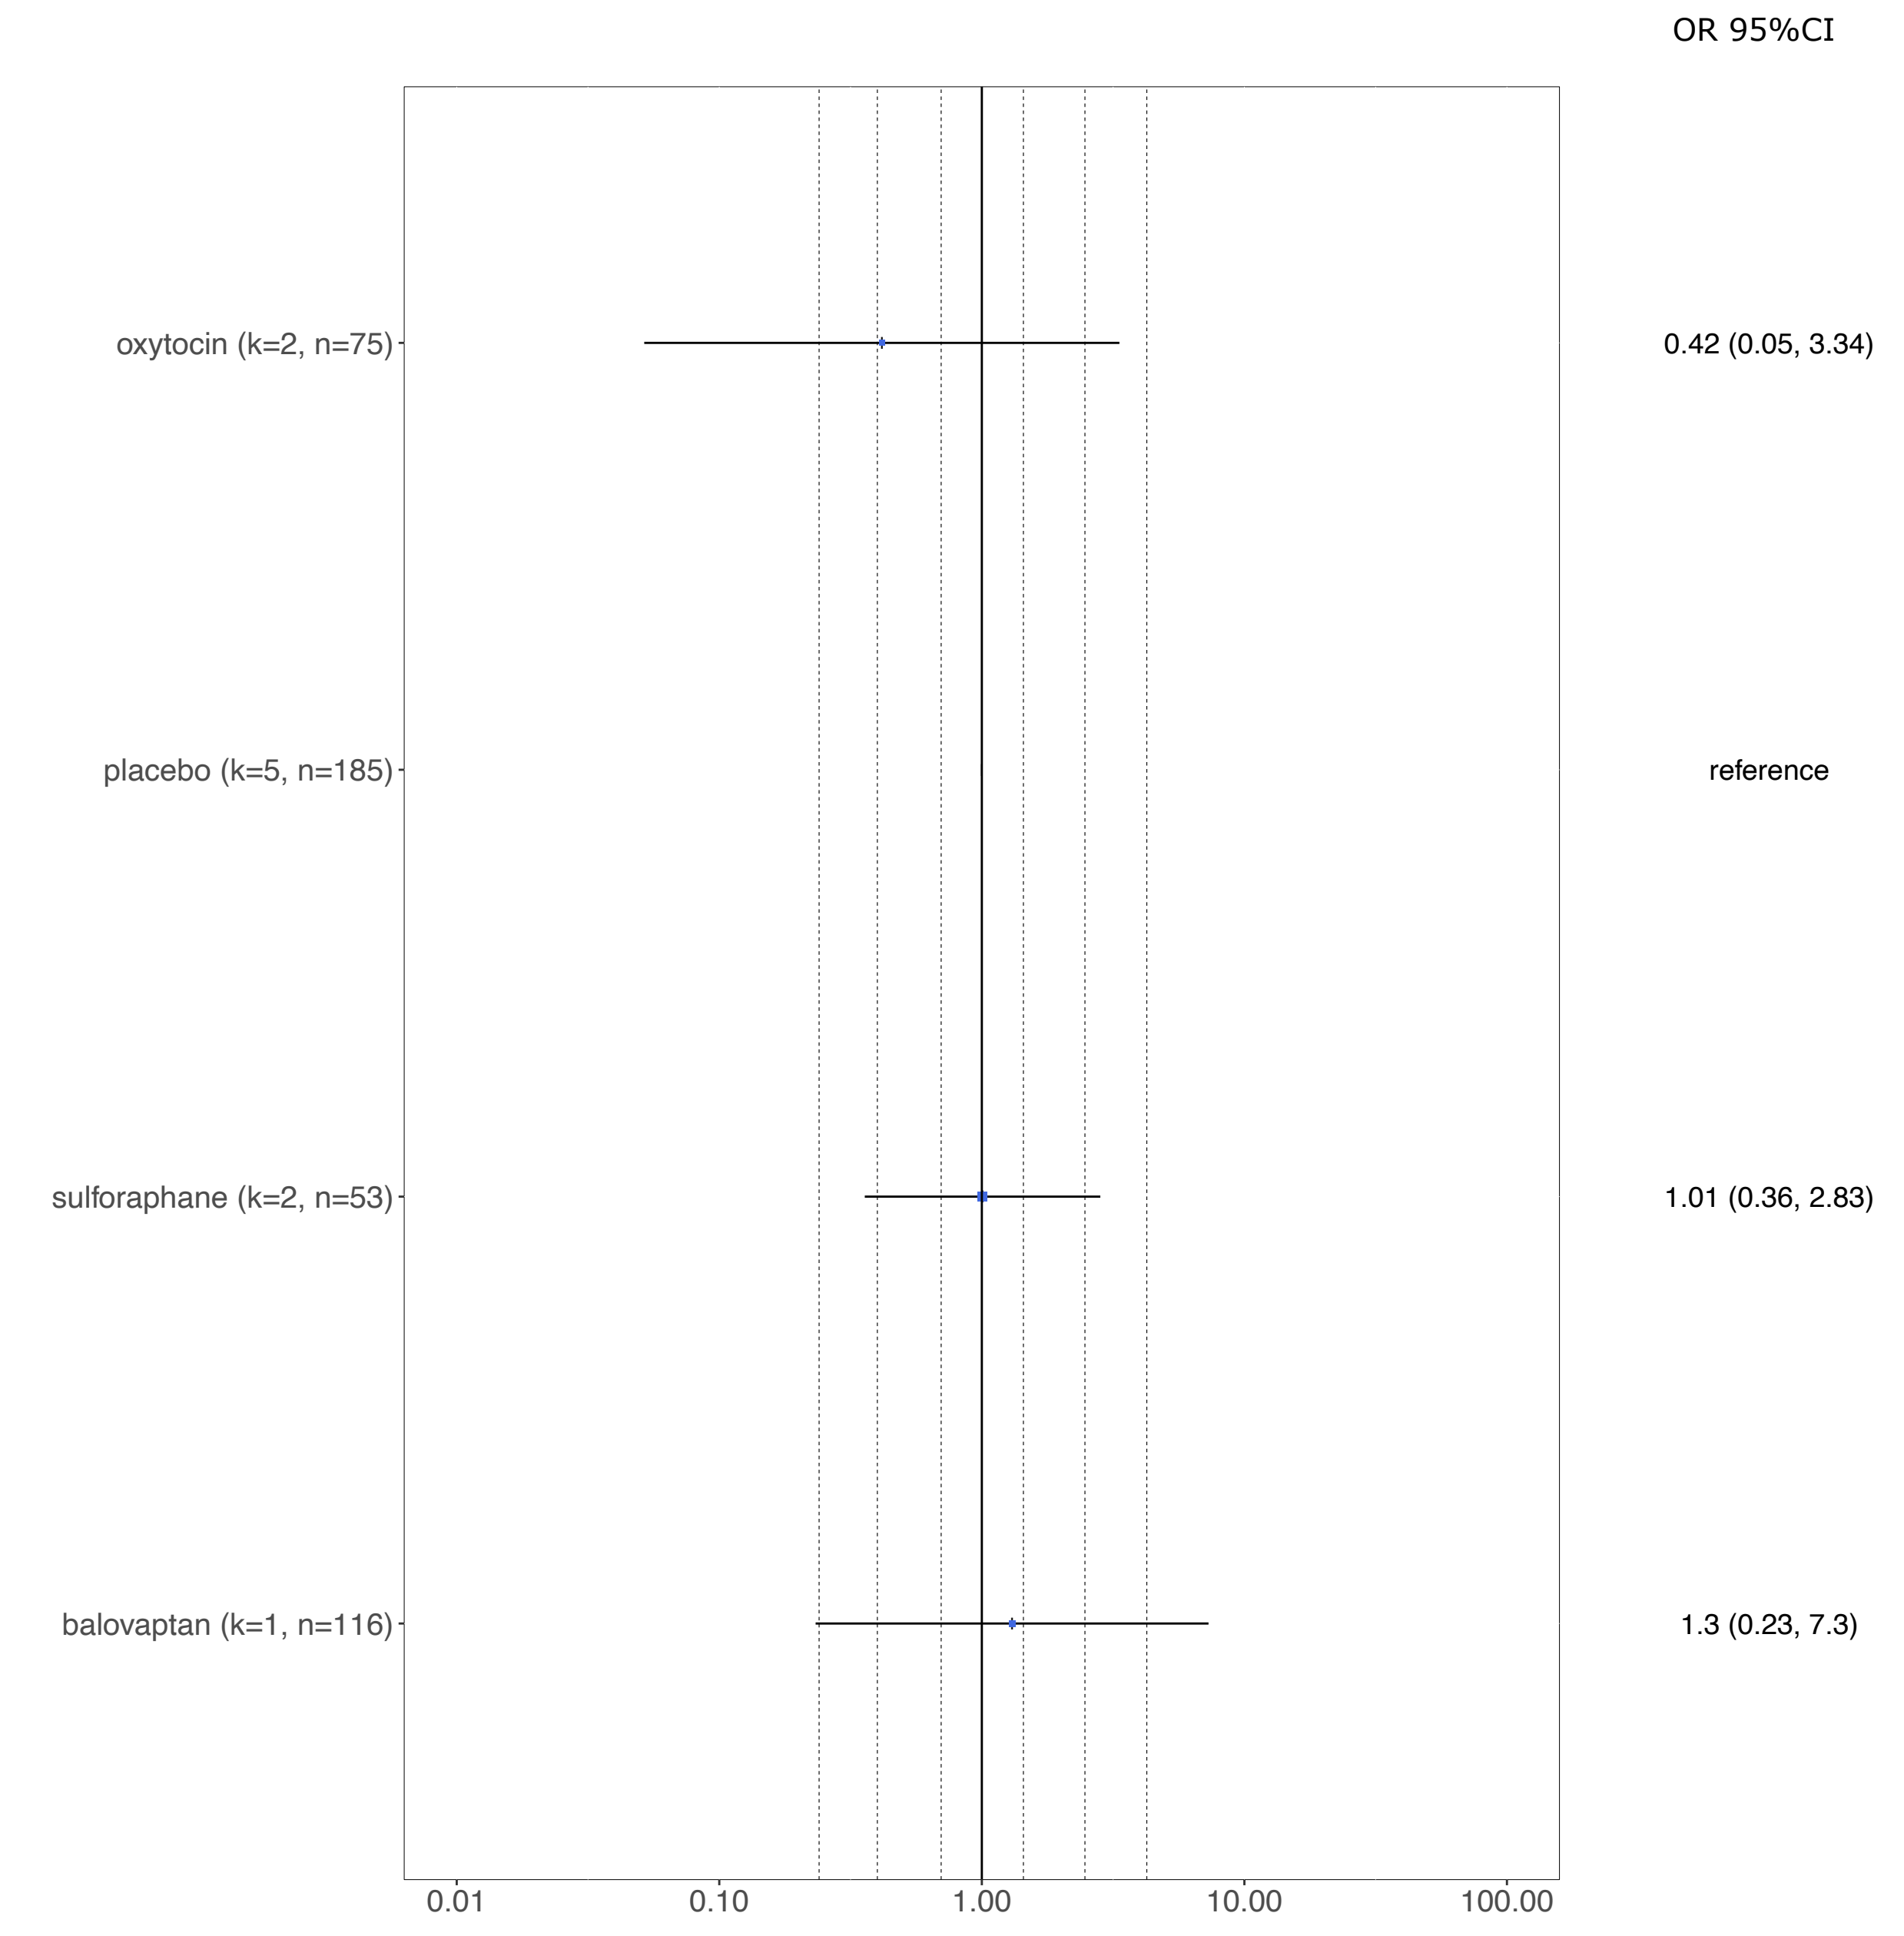

Fewer ← → More

# At least one extrapyramidal symptom

Children/adolescents \*

Adults

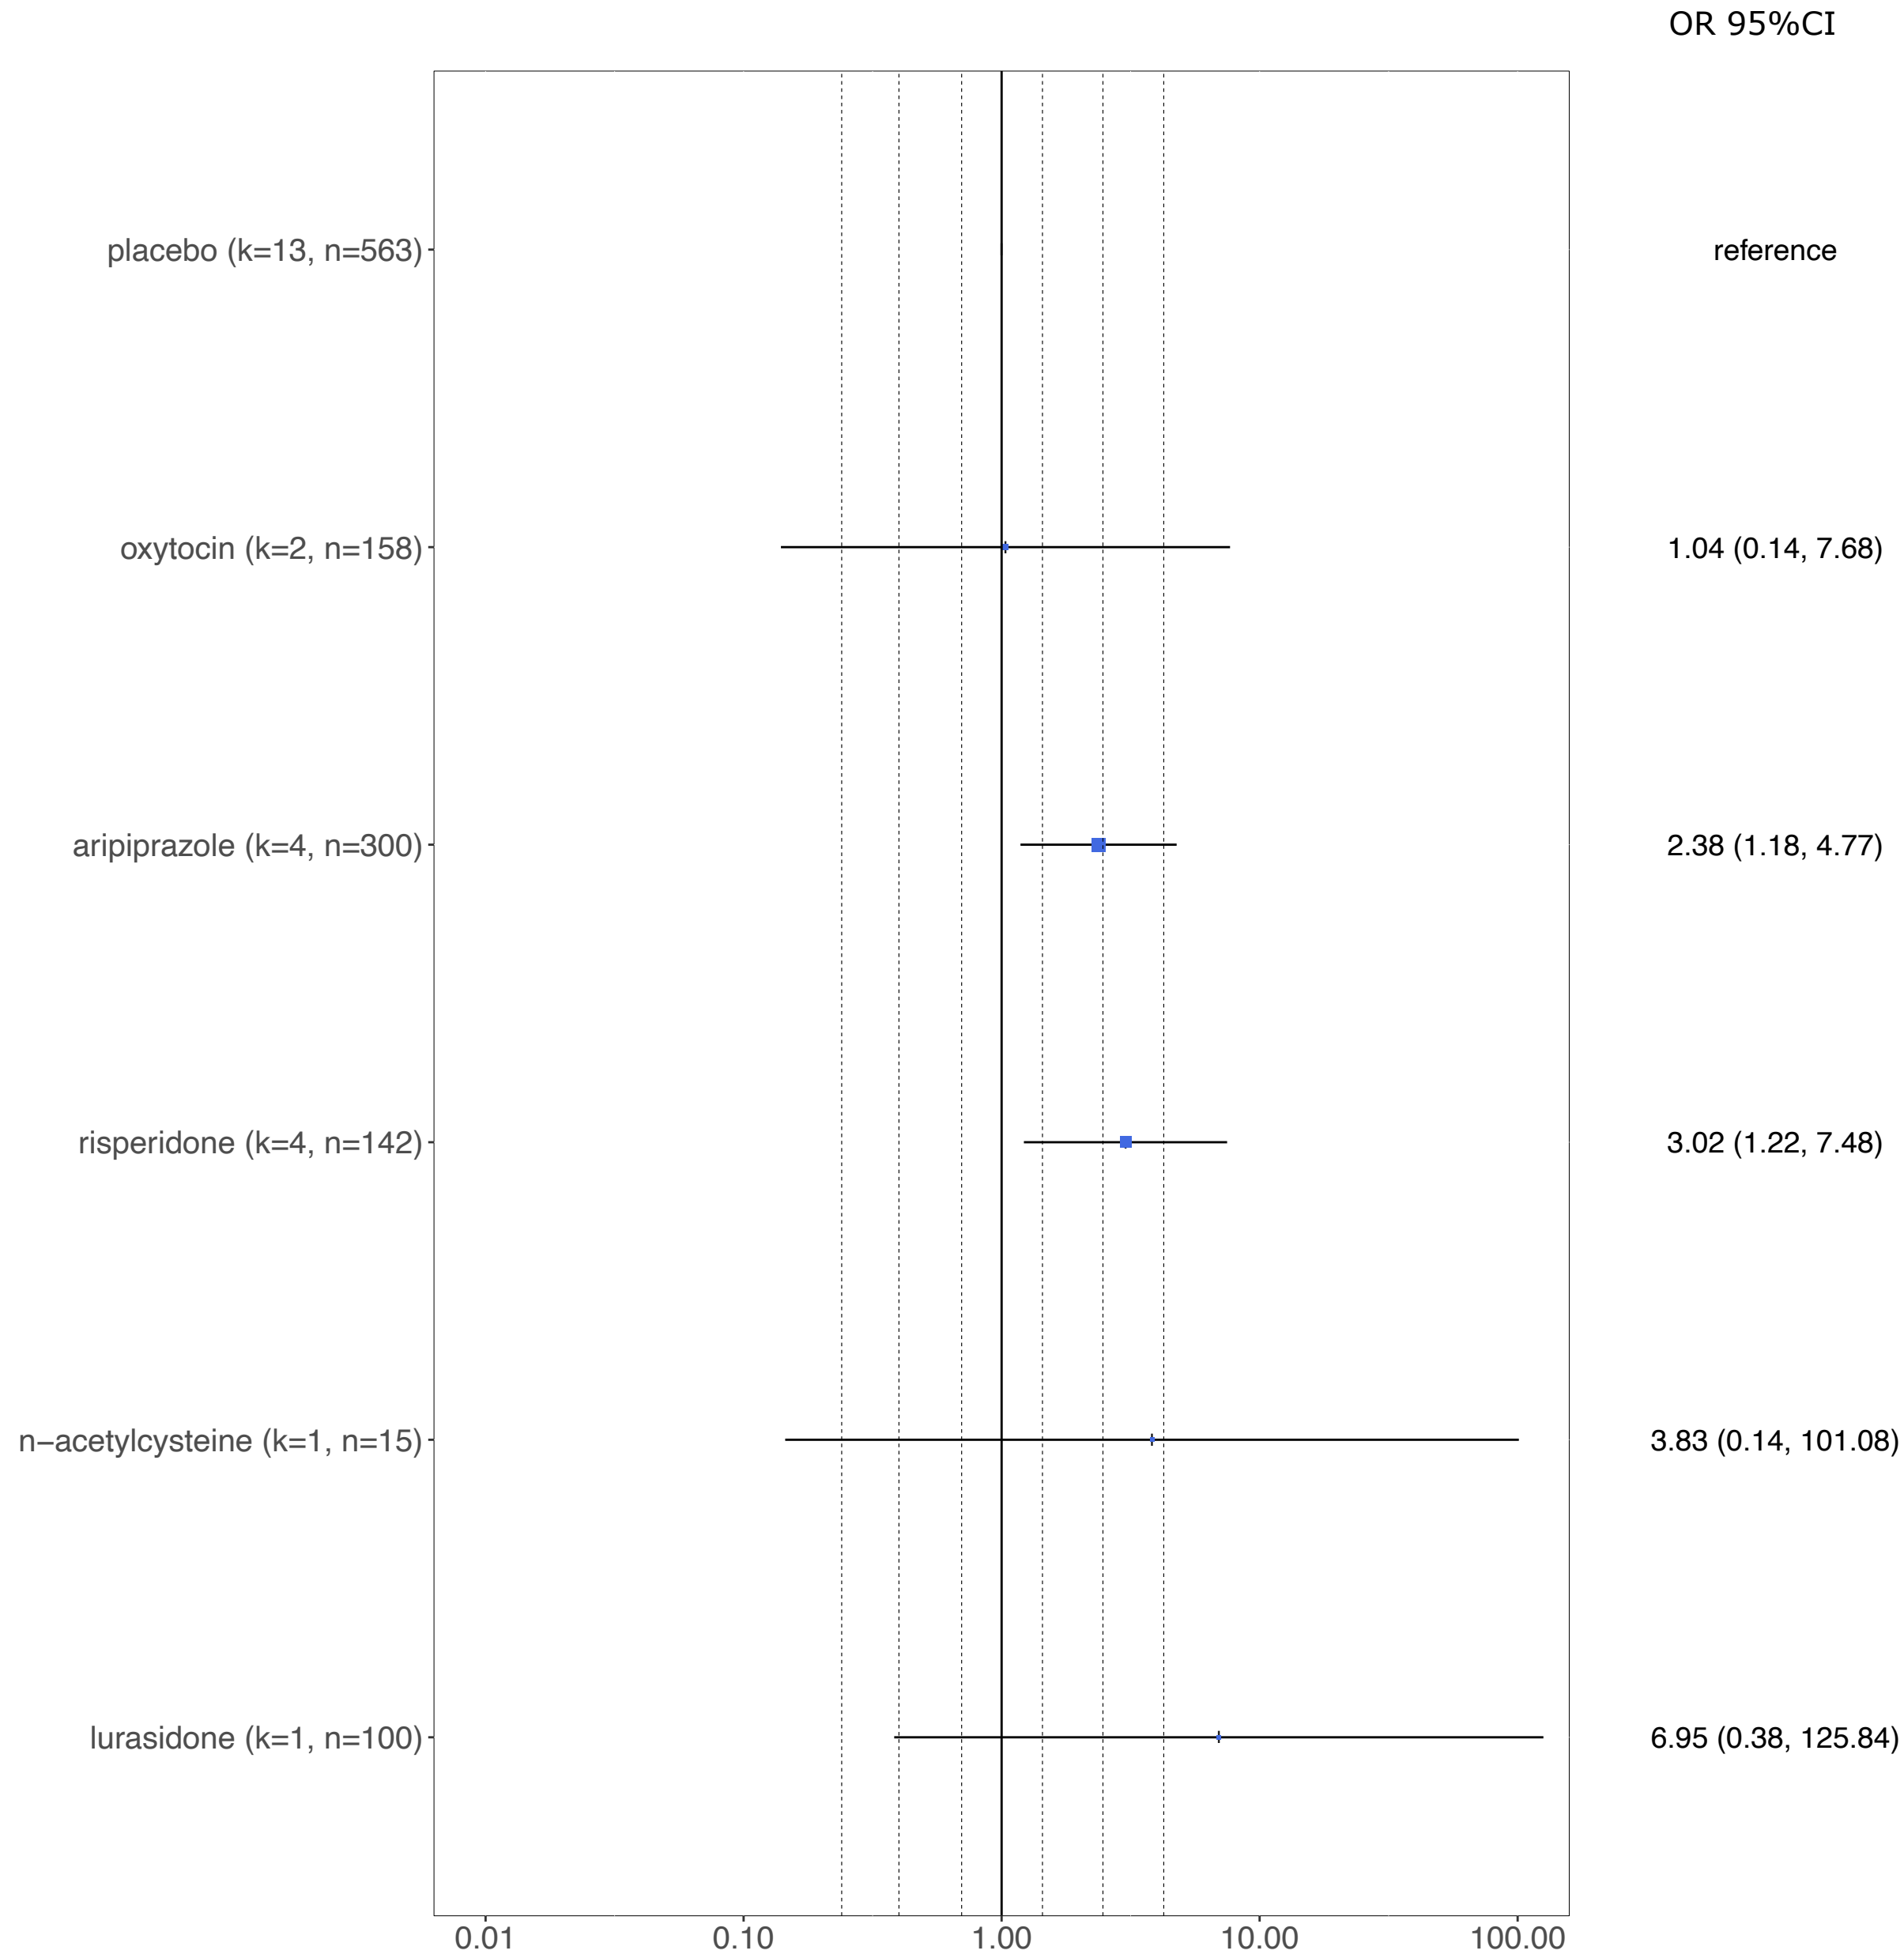

*No data available*

\*pairwise meta-analysis  
due to disconnected network

Fewer ← → More
