# Supplementary material for: Pharmacological and dietary-supplement treatments for autism spectrum disorder: a systematic review and network meta-analysis
Source: Springer Nature journal article supplement (doi:10.1186/s13229-022-00488-4), 2022-03-04
Supplement: MOESM5 [file 20193664]

## Social-communication difficulties in adults

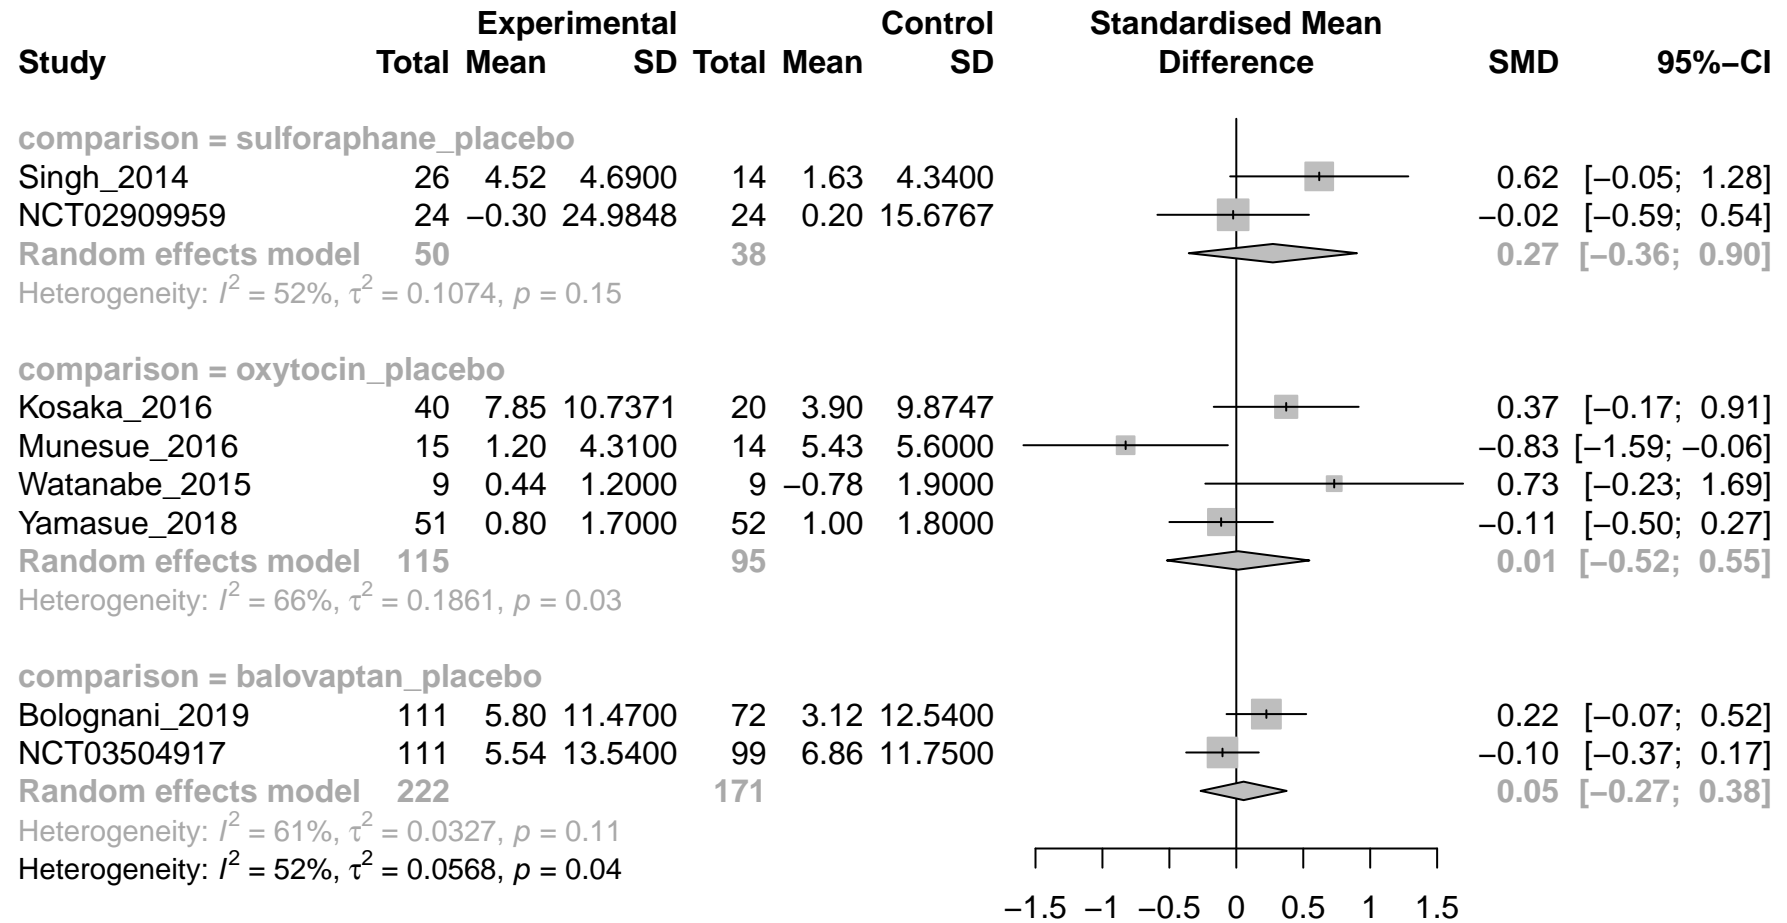



## Repetitive behaviors in adults

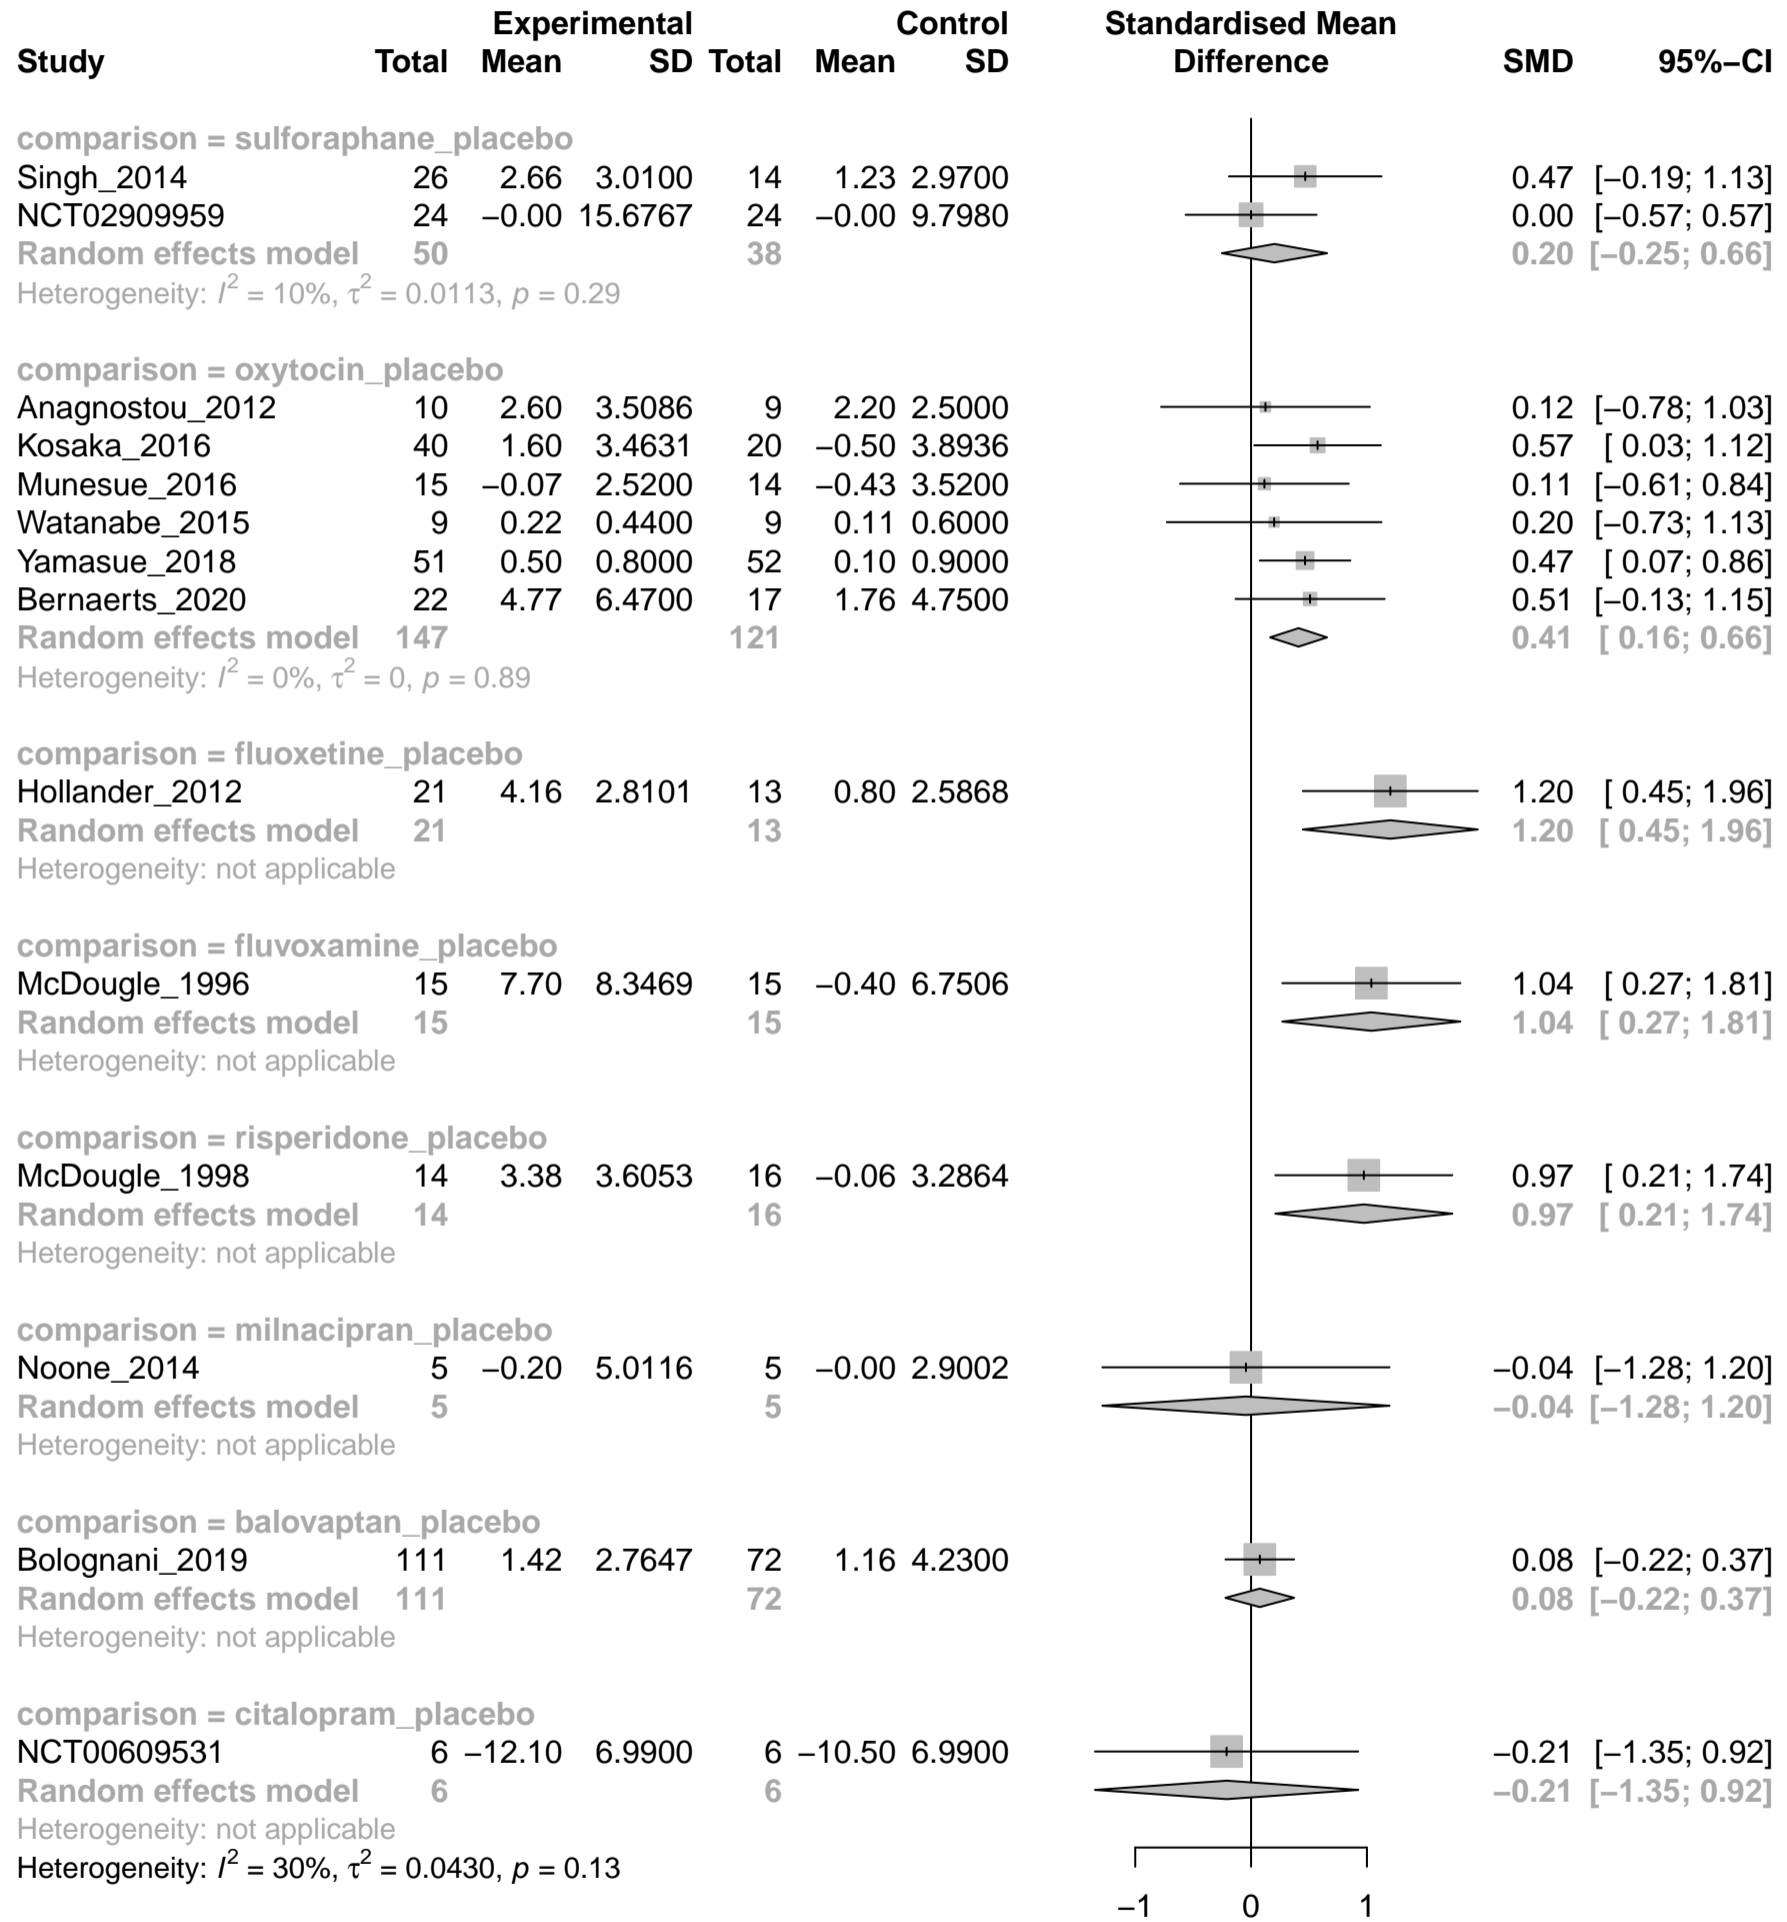



## Overall core symptoms in adults

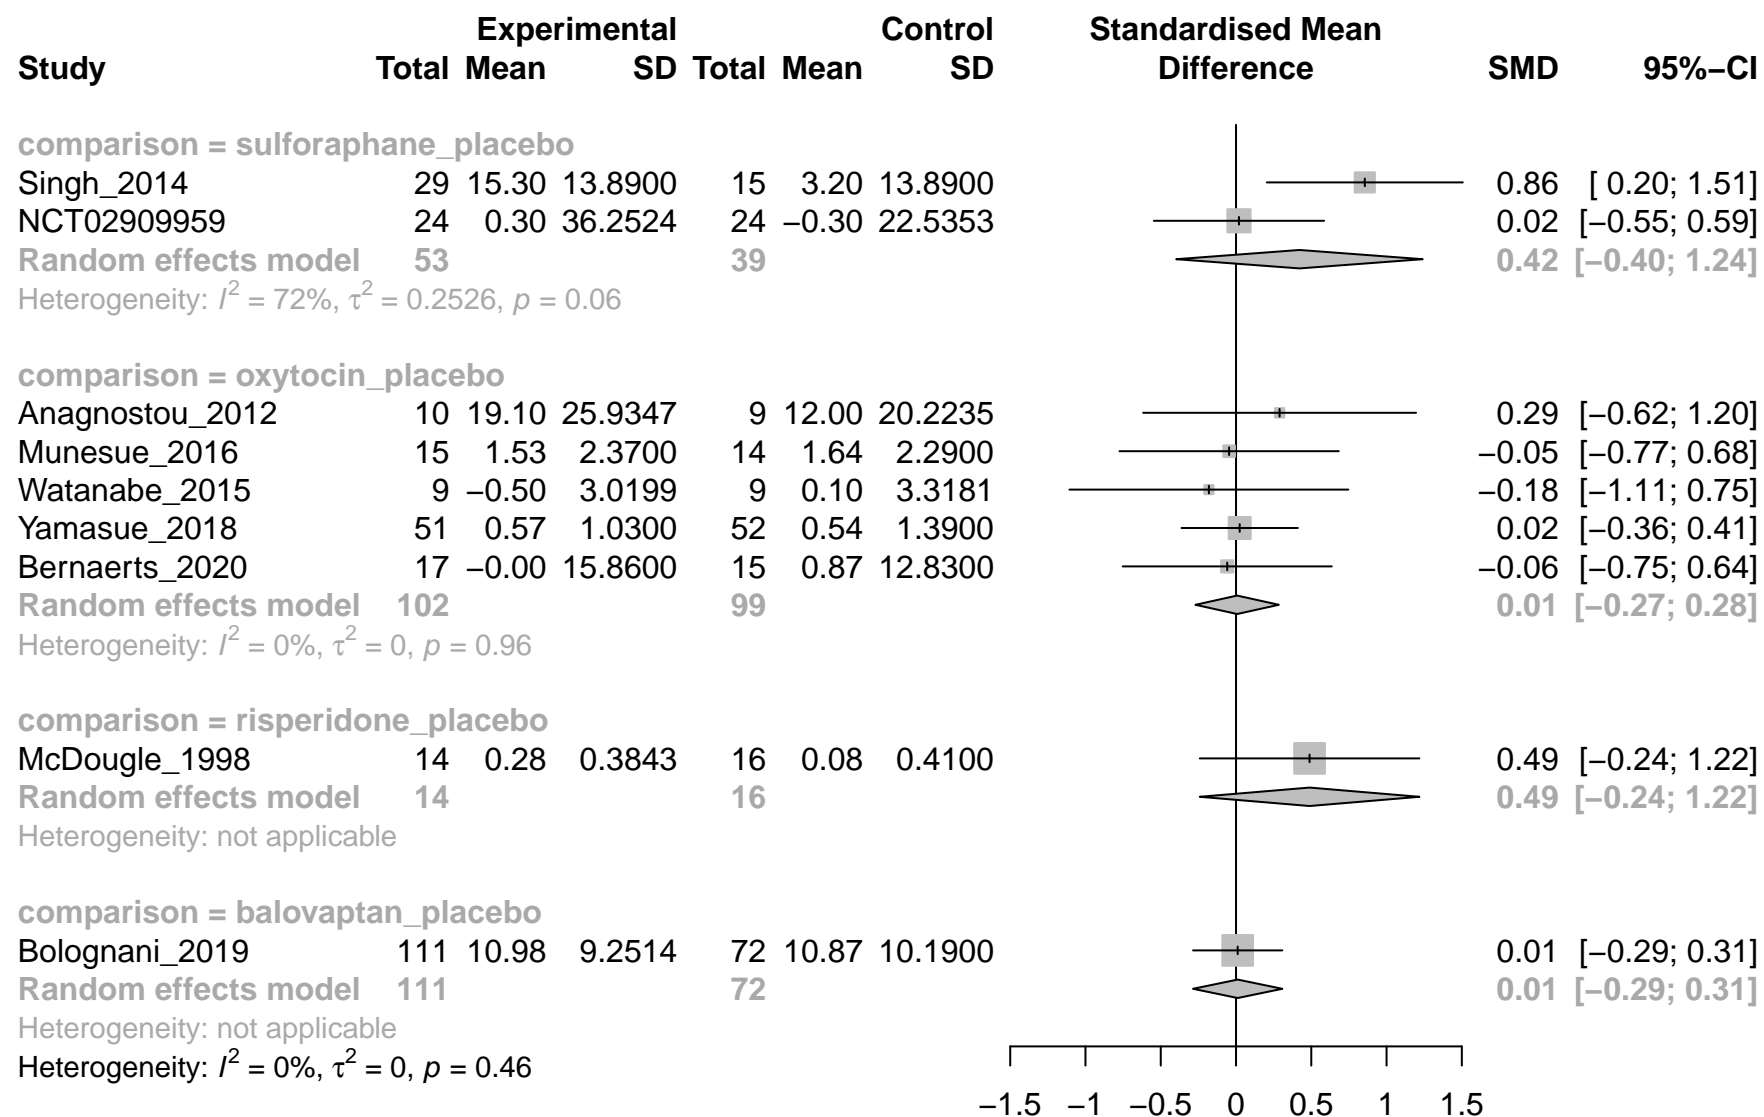



## Irritability in adults

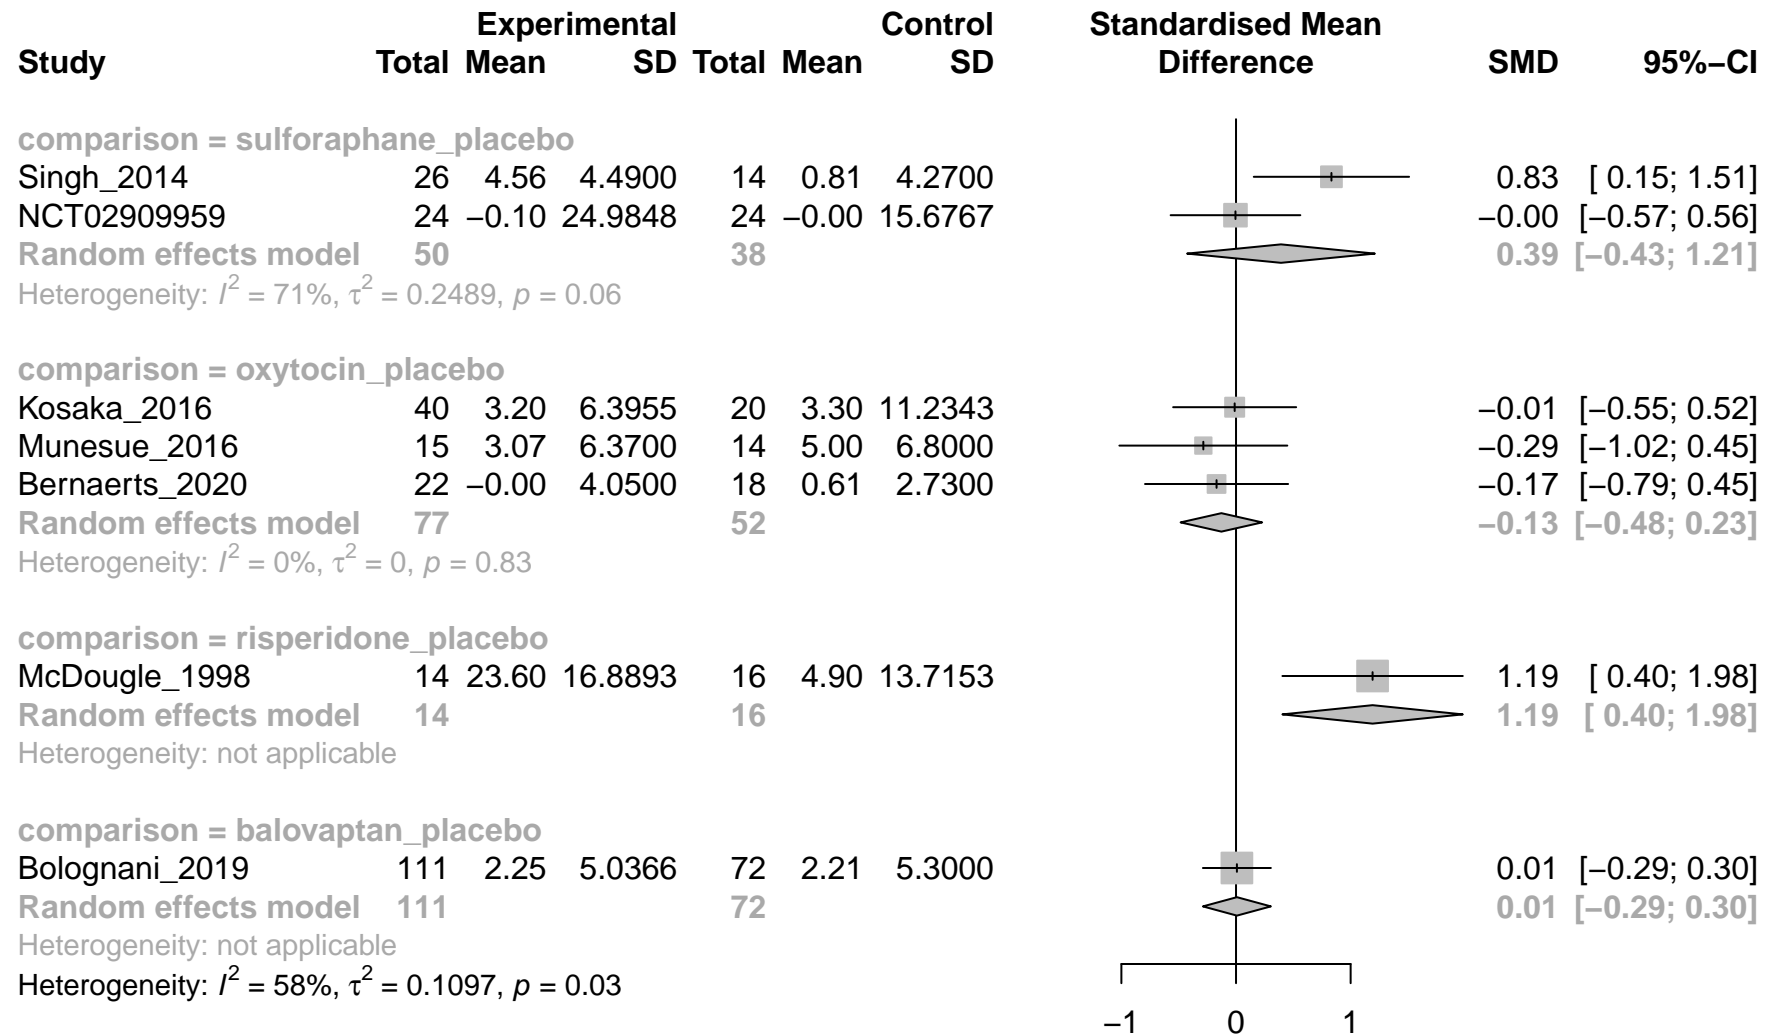





## ADHD symptoms in adults

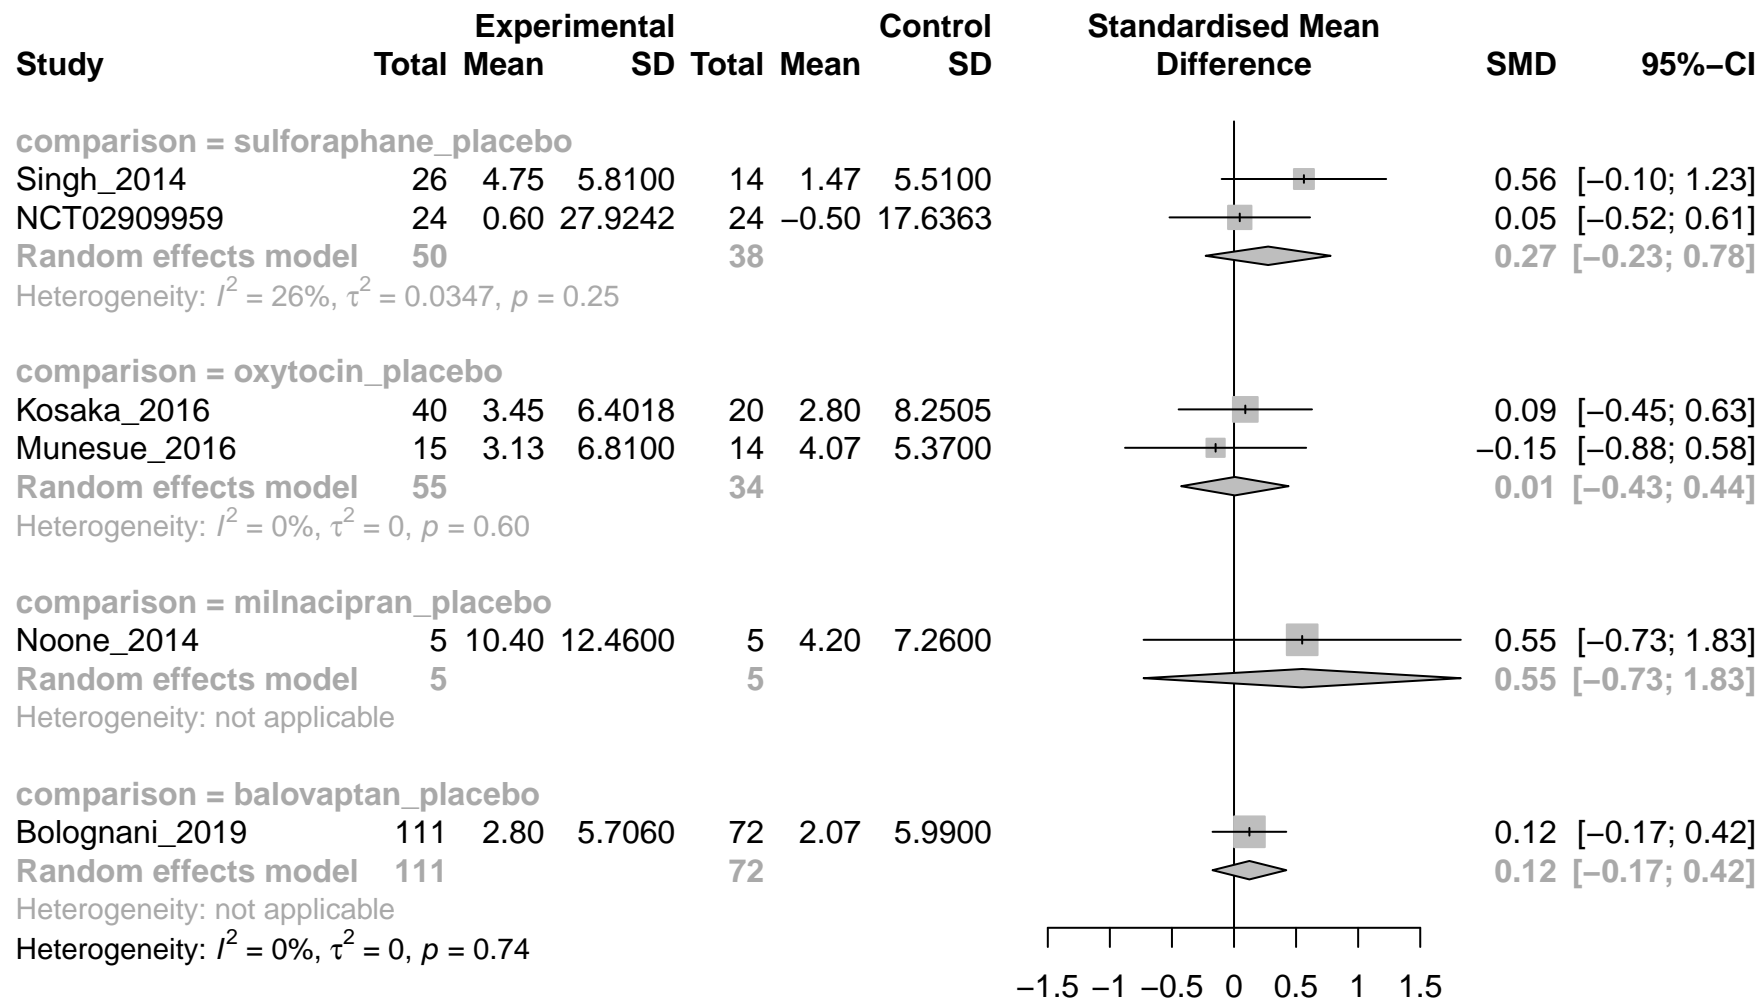

## Anxiety or depressive symptoms in children/adolescents

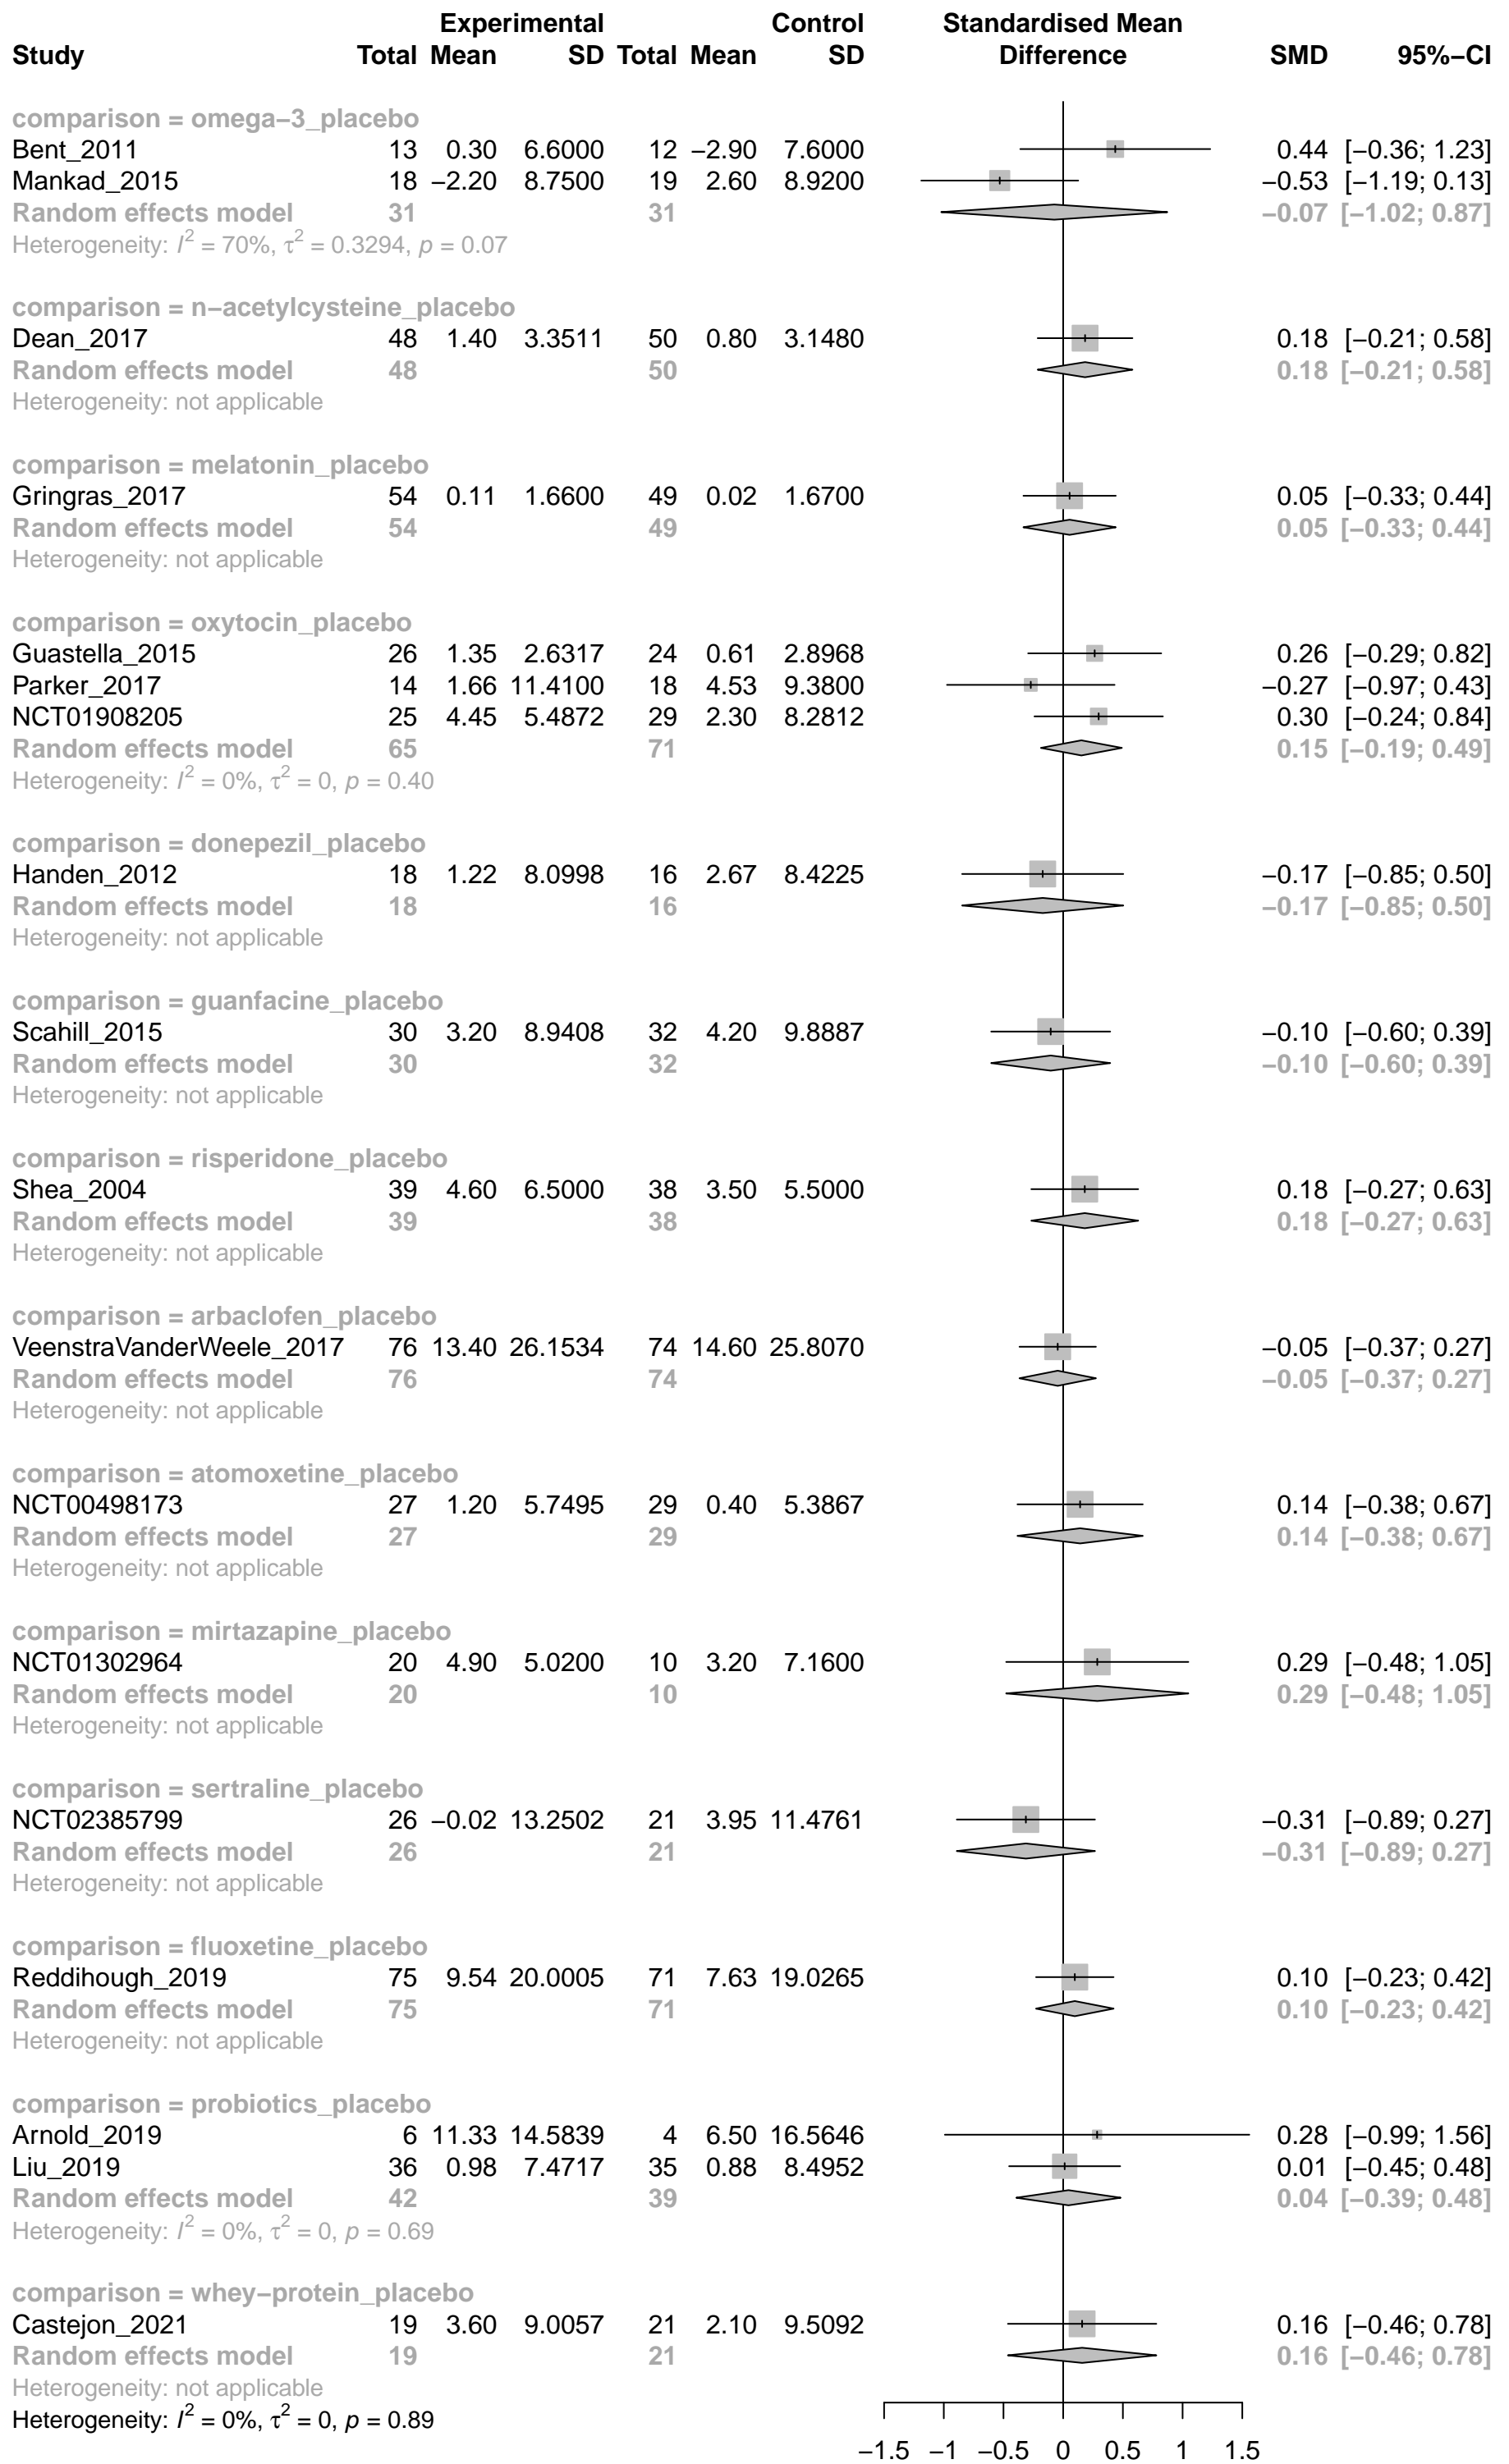

## Anxiety or depressive symptoms in adults

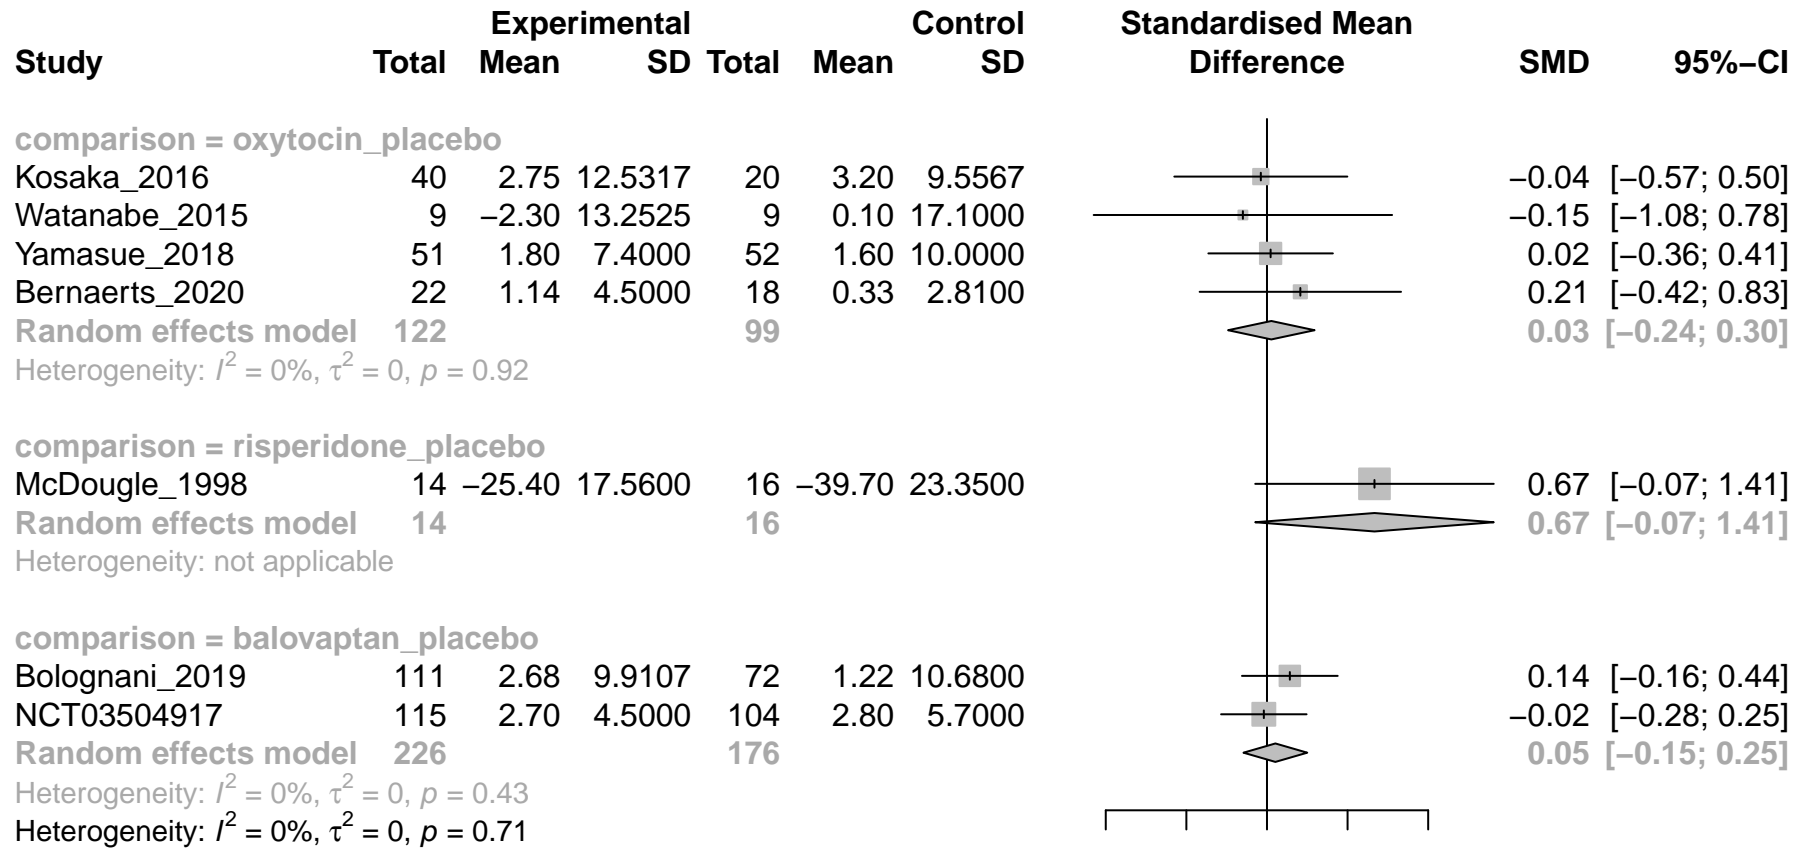

## Caregiver stress in children/adolescents

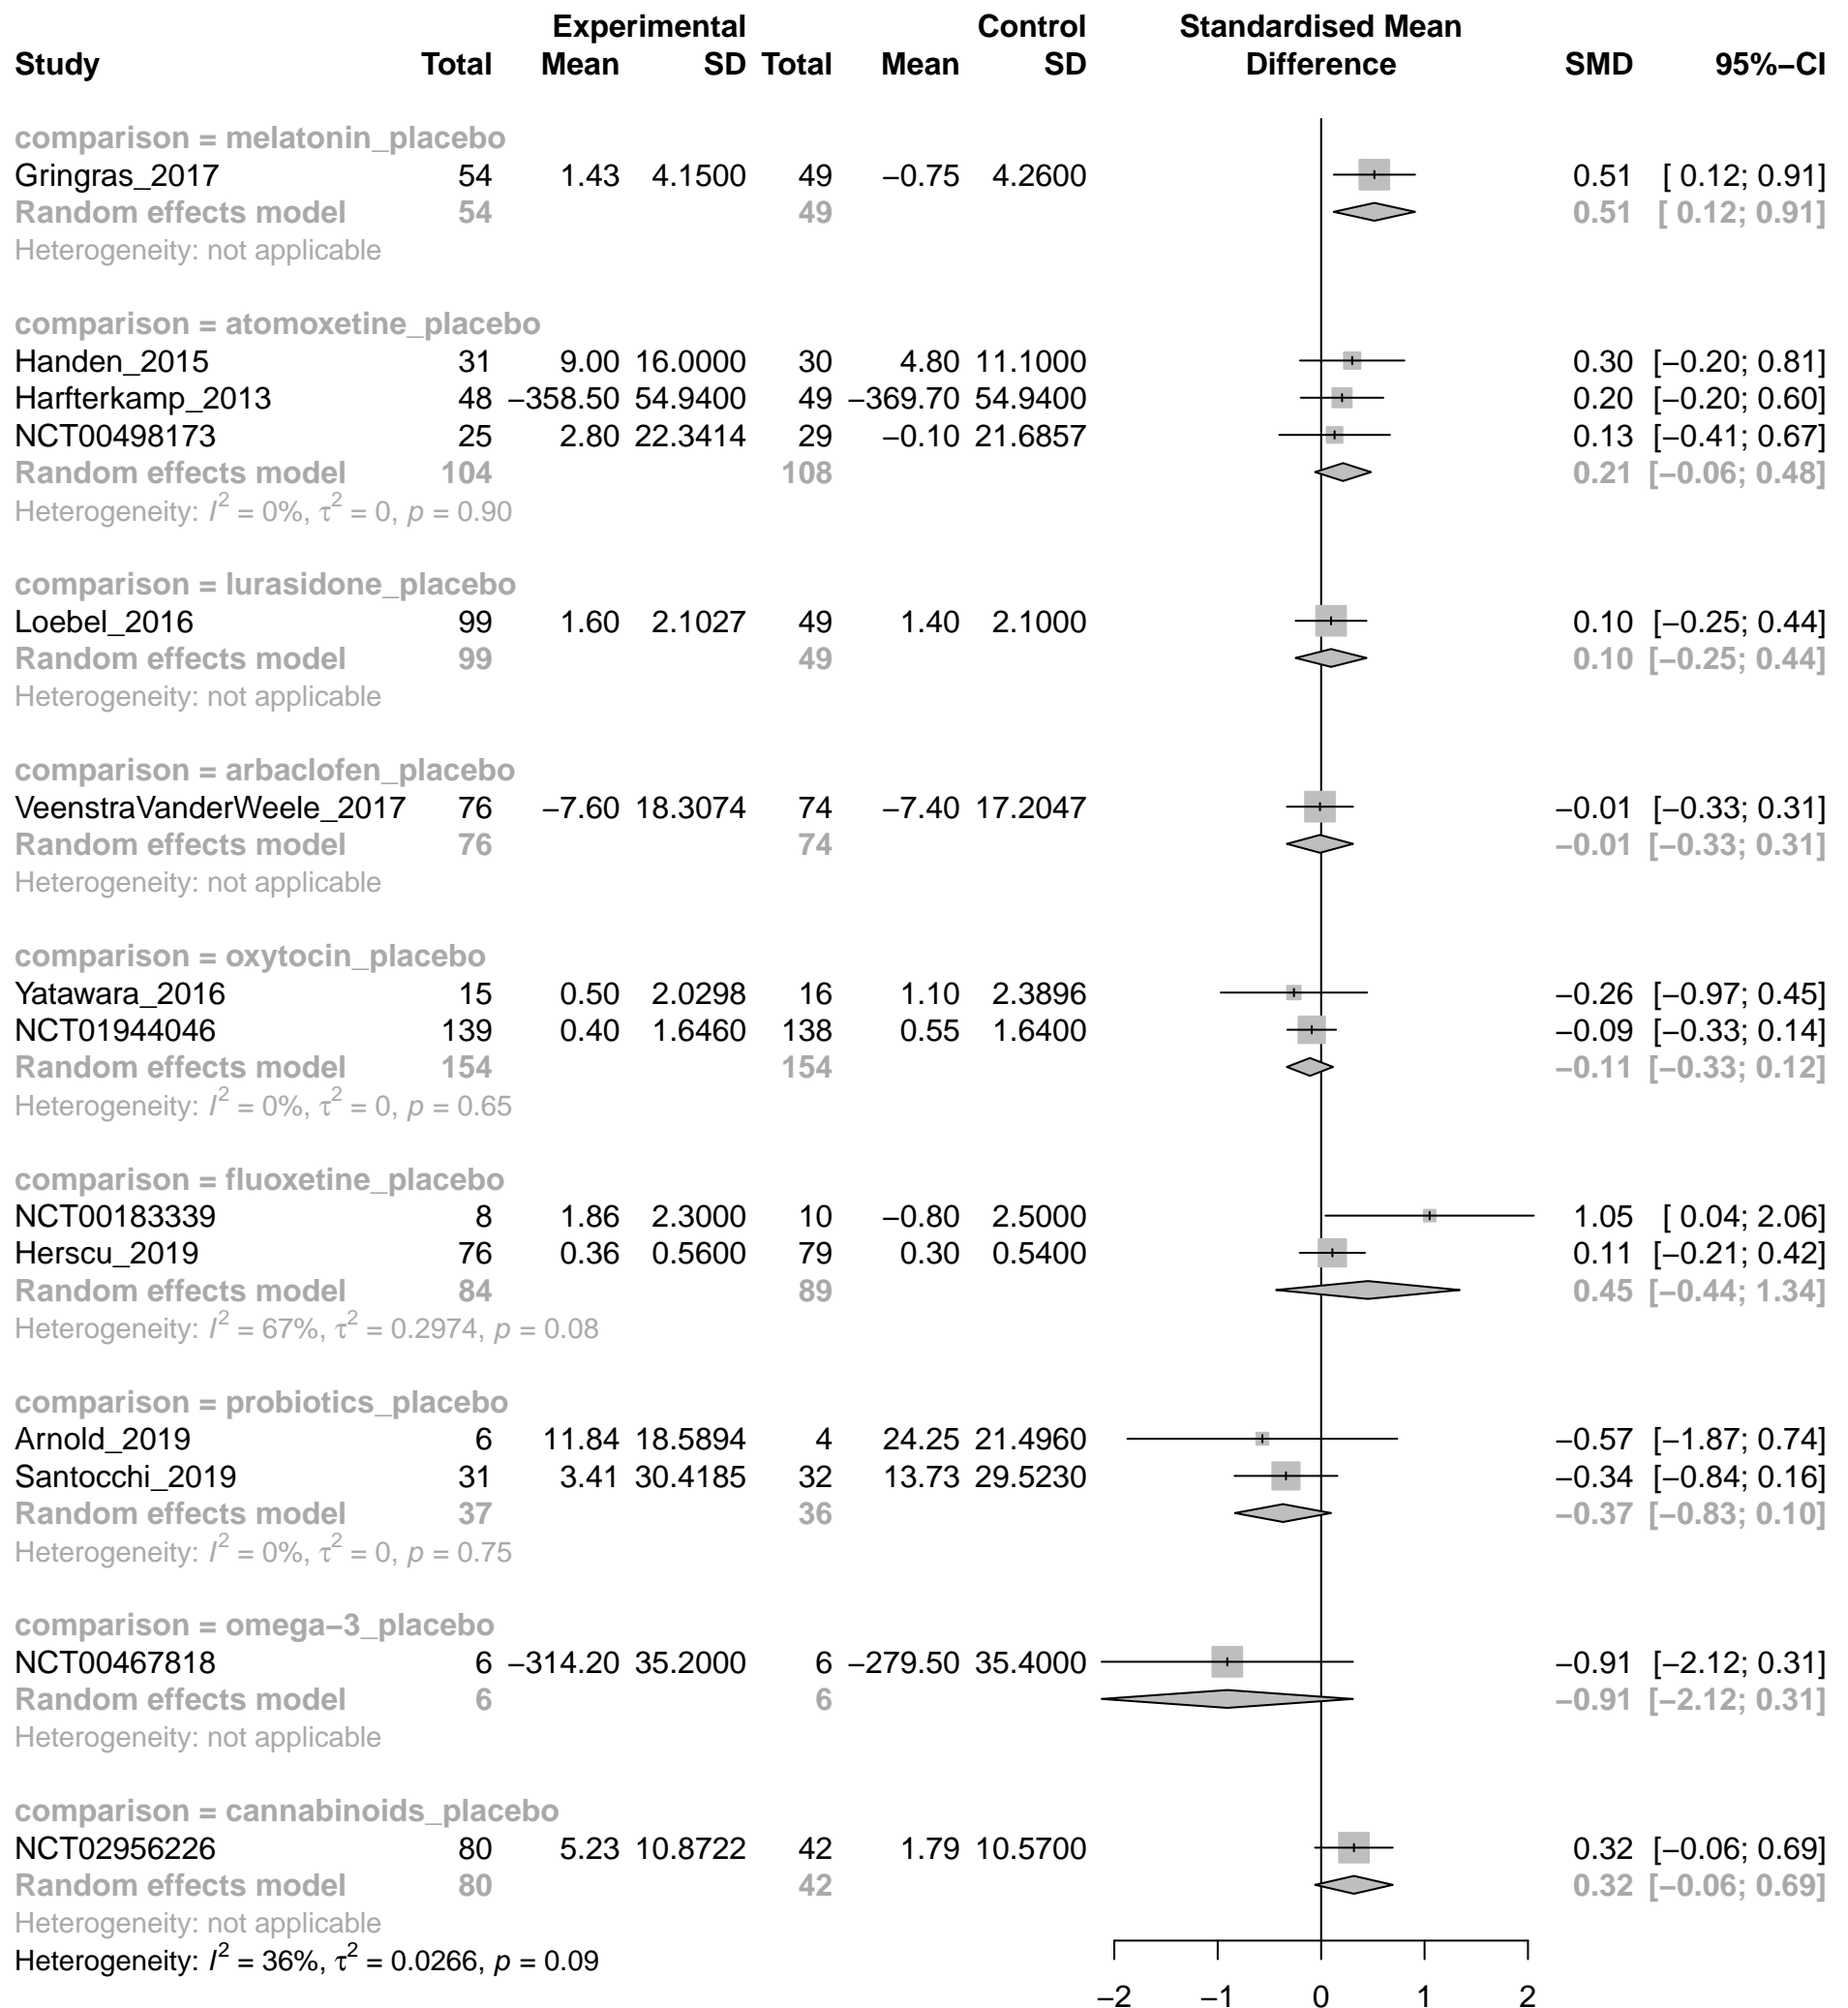

## Caregiver stress in adults

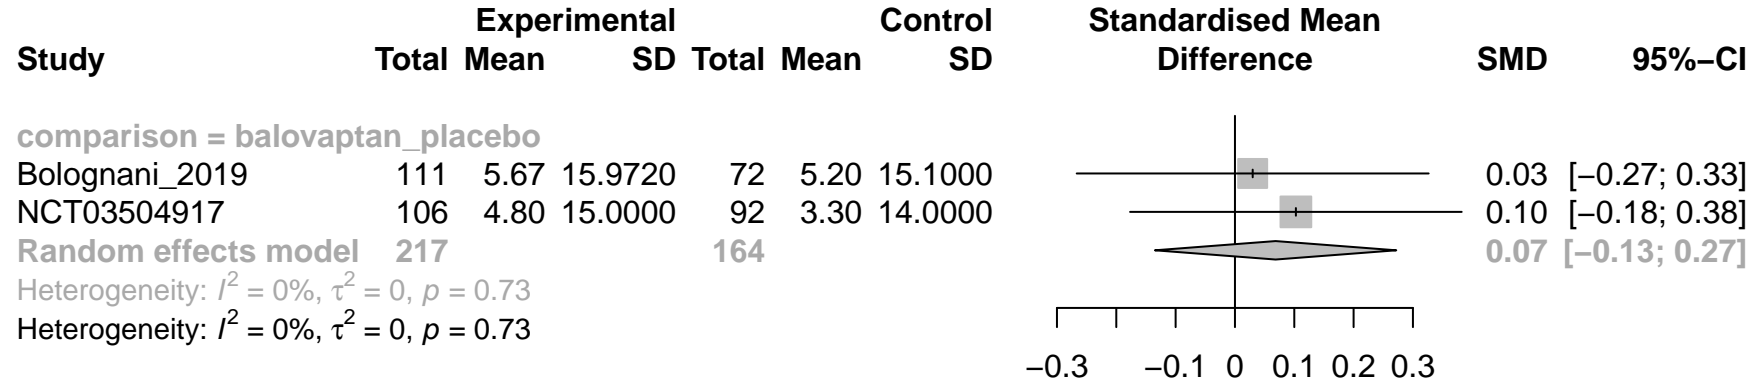

## Global functioning in children/adolescents

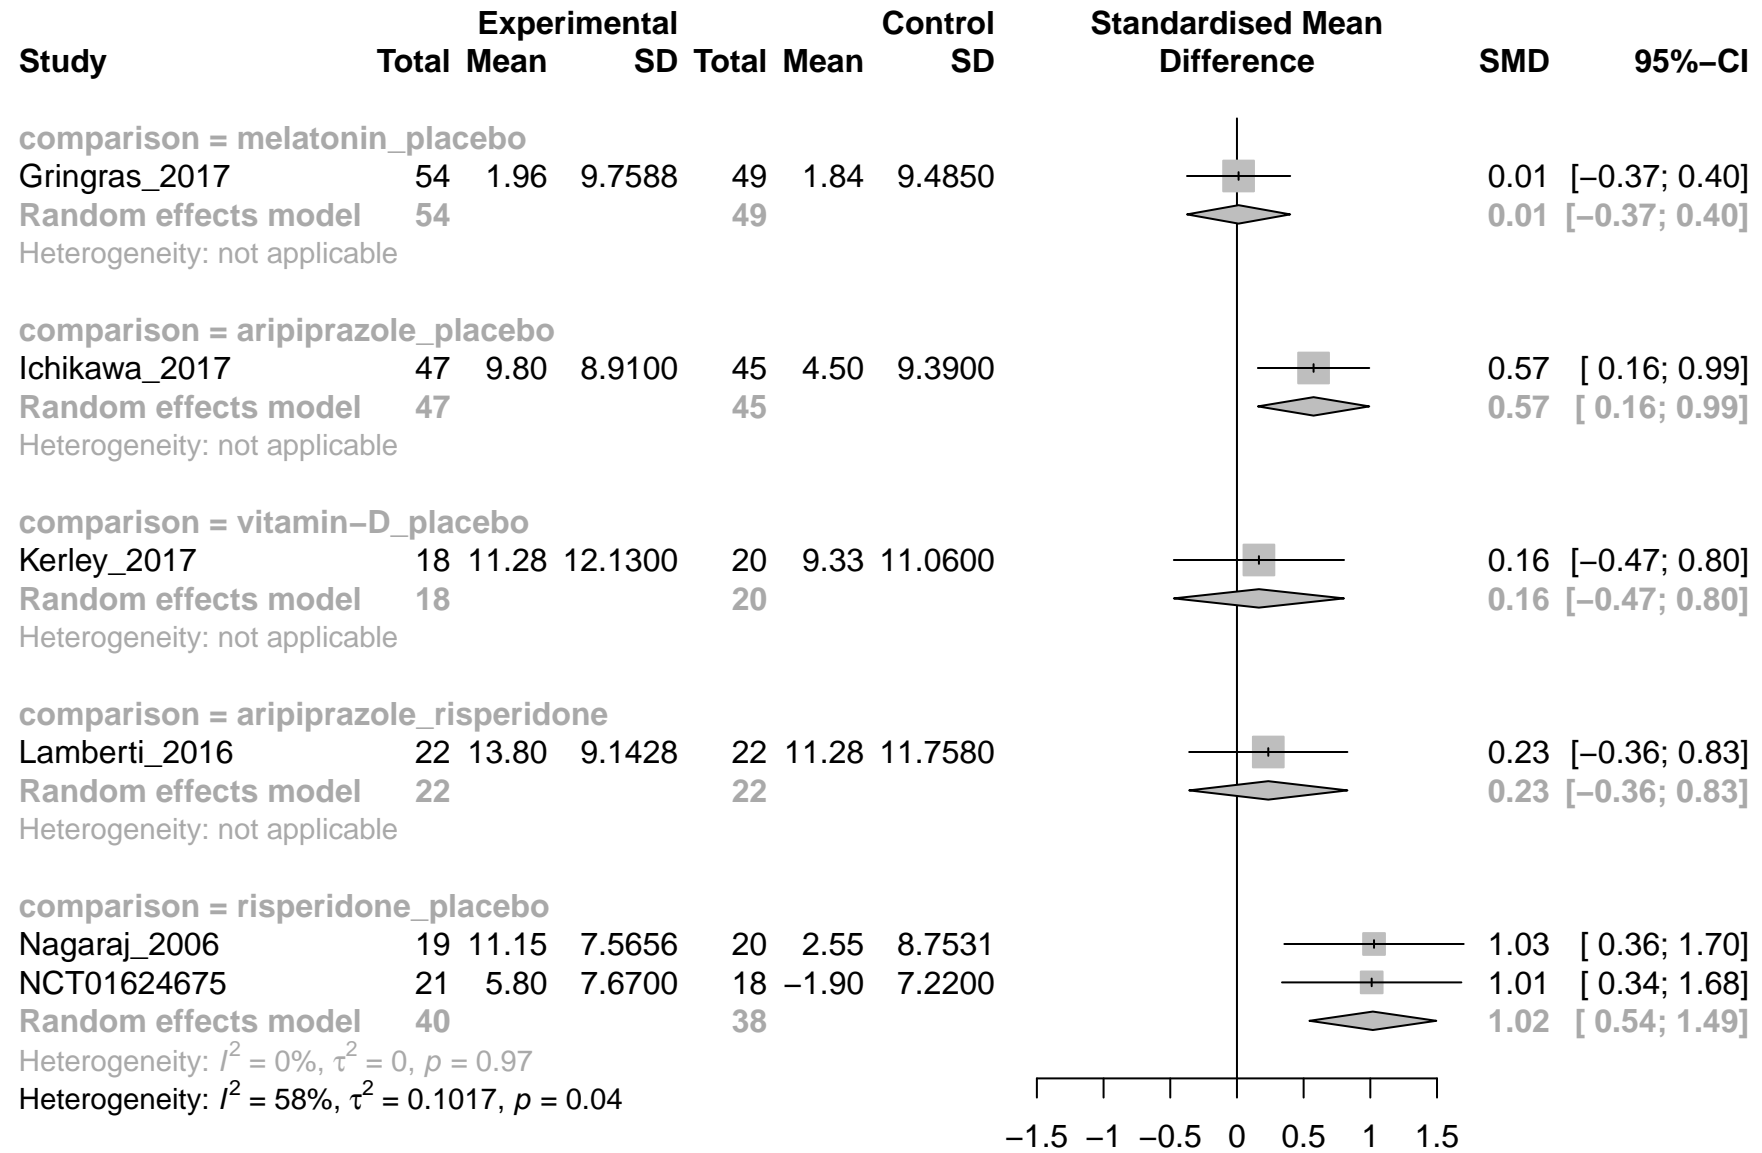

# Global functioning in adults

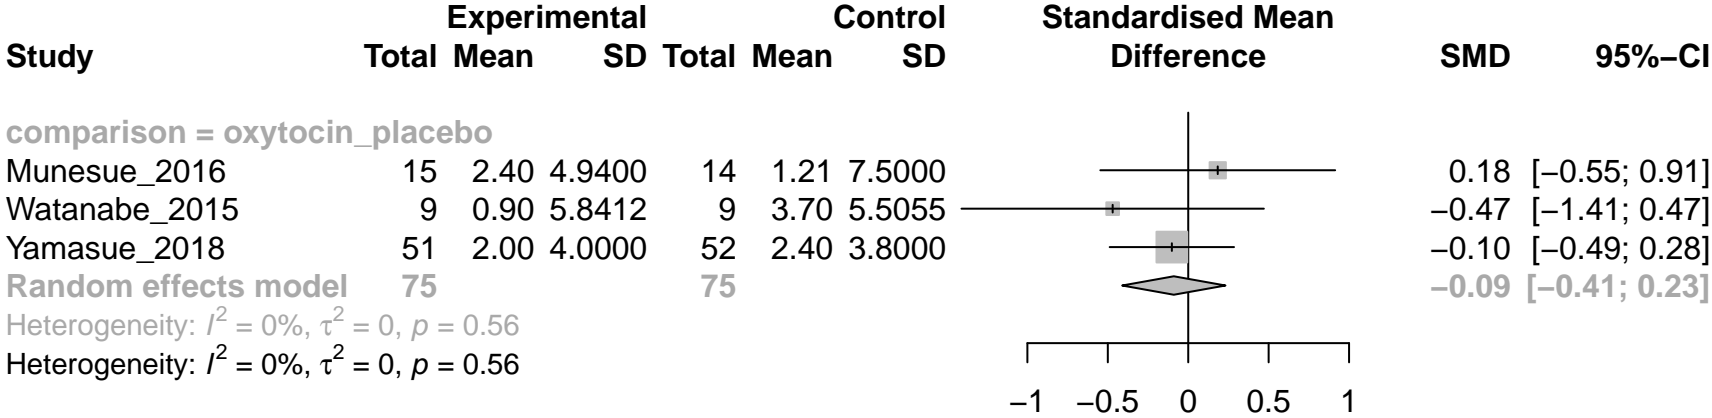



## Quality of life in children/adolescents

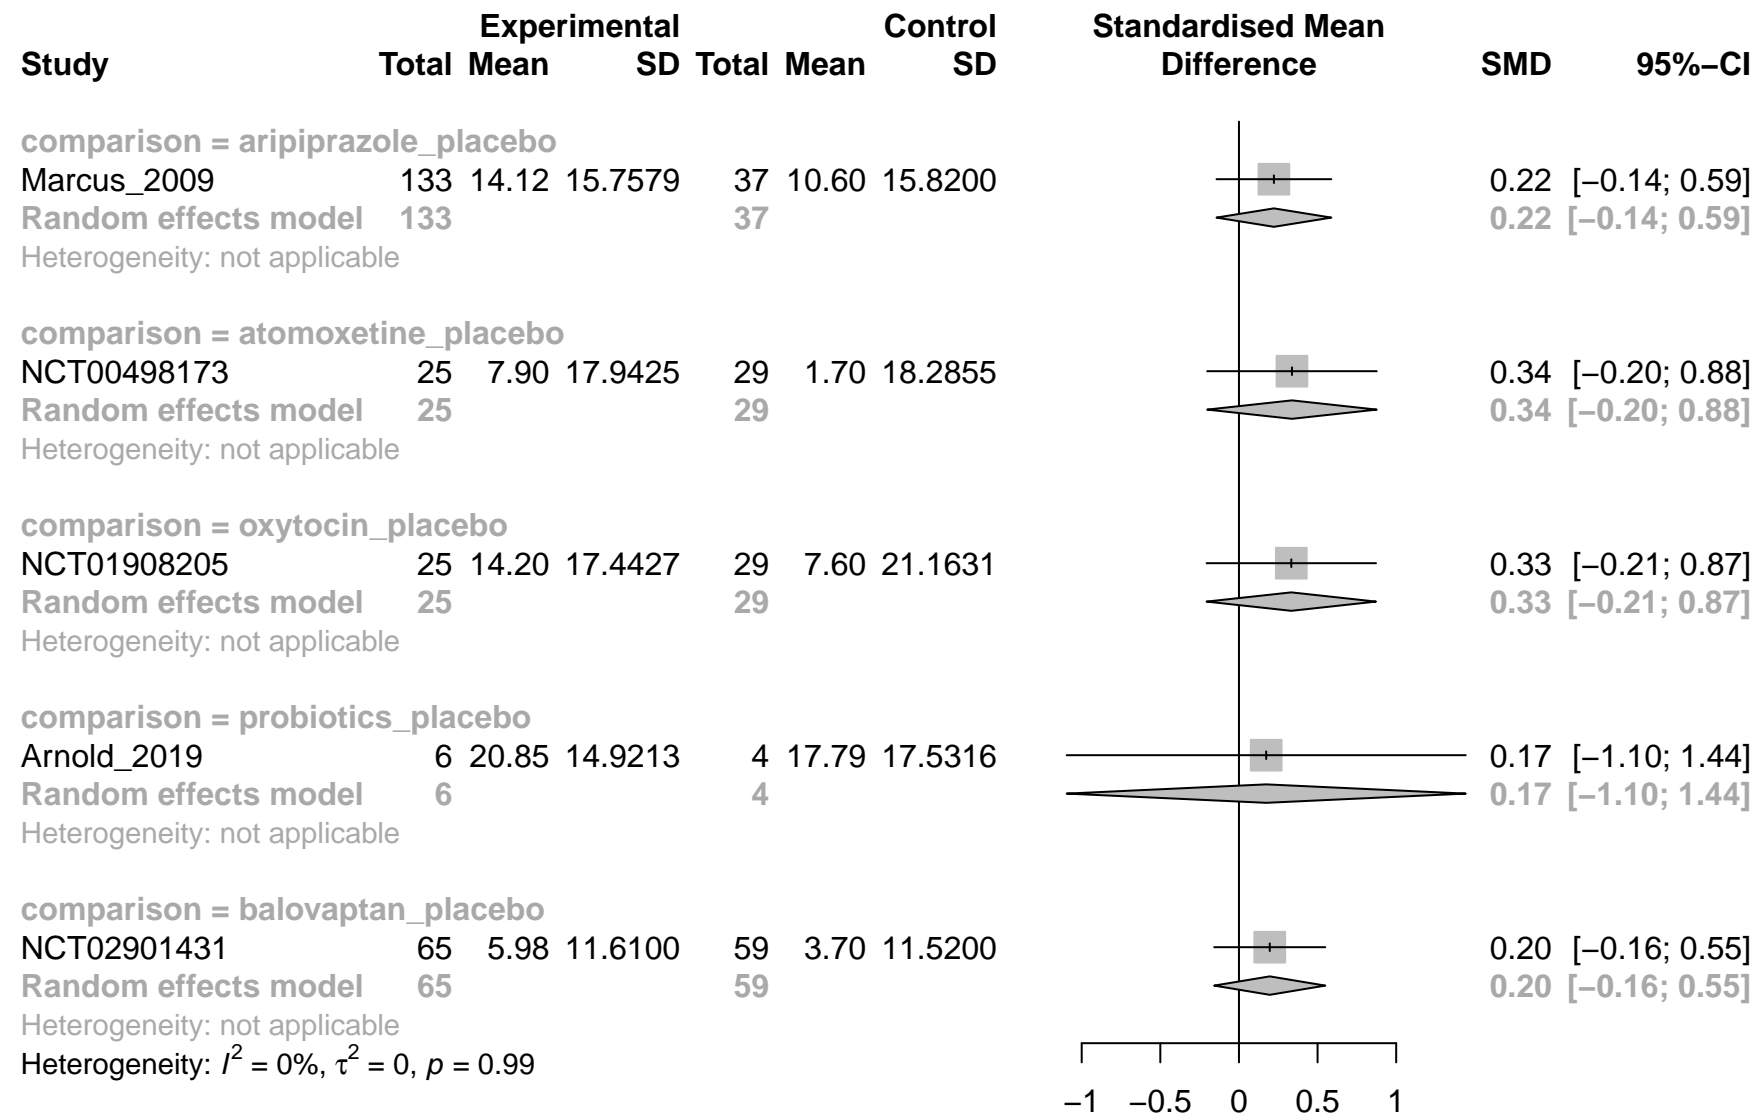

## Quality of life in adults

| Study                                                  | Experimental<br>Total Mean | SD    | Control<br>Total Mean | SD         | Standardised Mean<br>Difference | SMD     | 95%-CI                    |
|--------------------------------------------------------|----------------------------|-------|-----------------------|------------|---------------------------------|---------|---------------------------|
| <b>comparison = oxytocin_placebo</b>                   |                            |       |                       |            |                                 |         |                           |
| Anagnostou_2012                                        | 10                         | 11.70 | 16.1521               | 9          | -2.00                           | 12.3000 | 0.90 [-0.05; 1.86]        |
| Watanabe_2015                                          | 9                          | 0.03  | 0.6139                | 9          | -0.02                           | 0.8982  | 0.06 [-0.86; 0.99]        |
| Bernaerts_2020                                         | 22                         | 1.77  | 8.0400                | 17         | -1.35                           | 6.7400  | 0.41 [-0.23; 1.05]        |
| <b>Random effects model</b>                            | <b>41</b>                  |       |                       | <b>35</b>  |                                 |         | <b>0.44 [-0.02; 0.90]</b> |
| Heterogeneity: $I^2 = 0\%$ , $\tau^2 = 0$ , $p = 0.46$ |                            |       |                       |            |                                 |         |                           |
| <b>comparison = balovaptan_placebo</b>                 |                            |       |                       |            |                                 |         |                           |
| Bolognani_2019                                         | 111                        | 7.43  | 10.6585               | 72         | 3.90                            | 13.0000 | 0.30 [0.00; 0.60]         |
| NCT03504917                                            | 106                        | 8.00  | 13.7000               | 92         | 6.00                            | 11.6000 | 0.16 [-0.12; 0.44]        |
| <b>Random effects model</b>                            | <b>217</b>                 |       |                       | <b>164</b> |                                 |         | <b>0.22 [0.02; 0.43]</b>  |
| Heterogeneity: $I^2 = 0\%$ , $\tau^2 = 0$ , $p = 0.48$ |                            |       |                       |            |                                 |         |                           |
| Heterogeneity: $I^2 = 0\%$ , $\tau^2 = 0$ , $p = 0.60$ |                            |       |                       |            |                                 |         |                           |

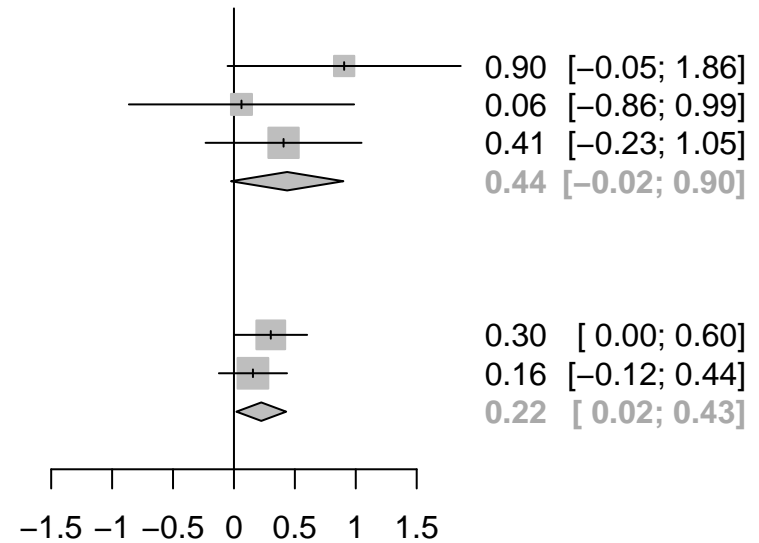

**Response in children/adolescents**

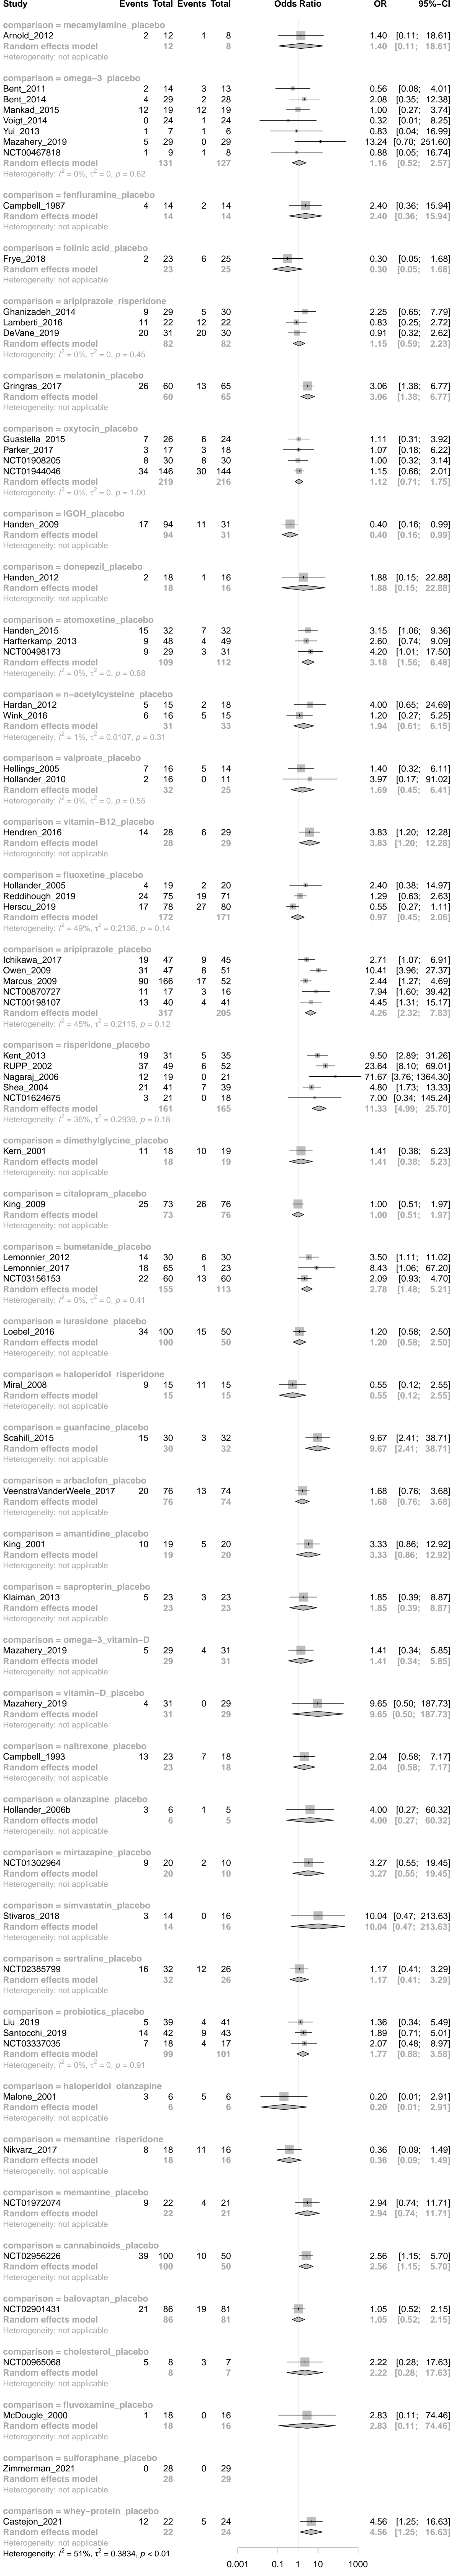

## Response in adults

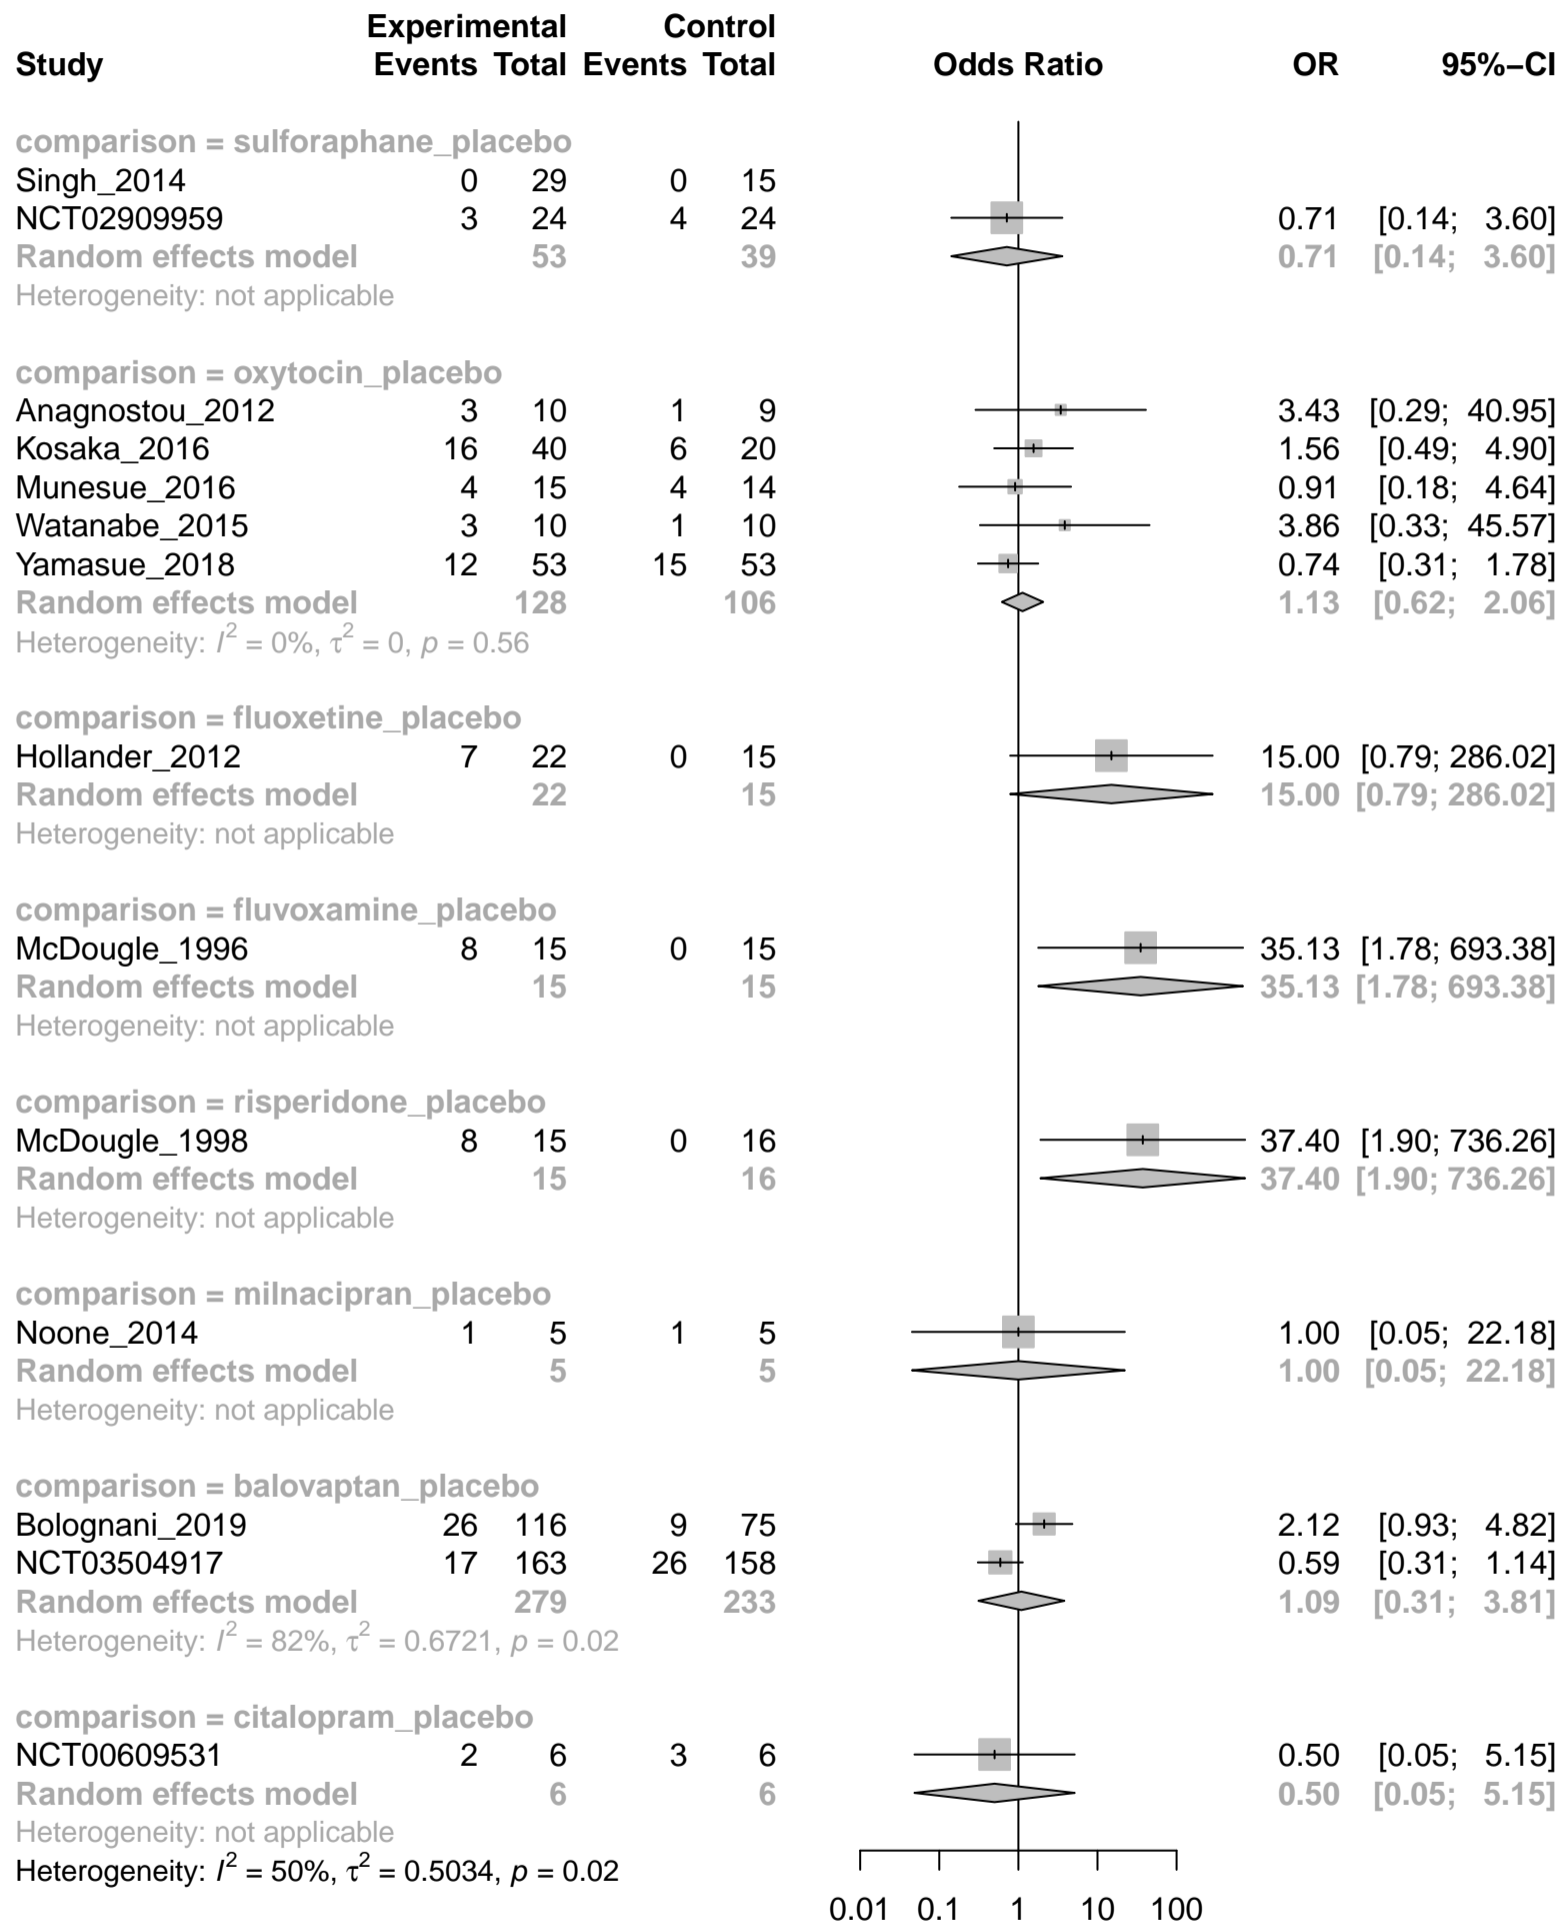



## Dropouts due to any reason in adults

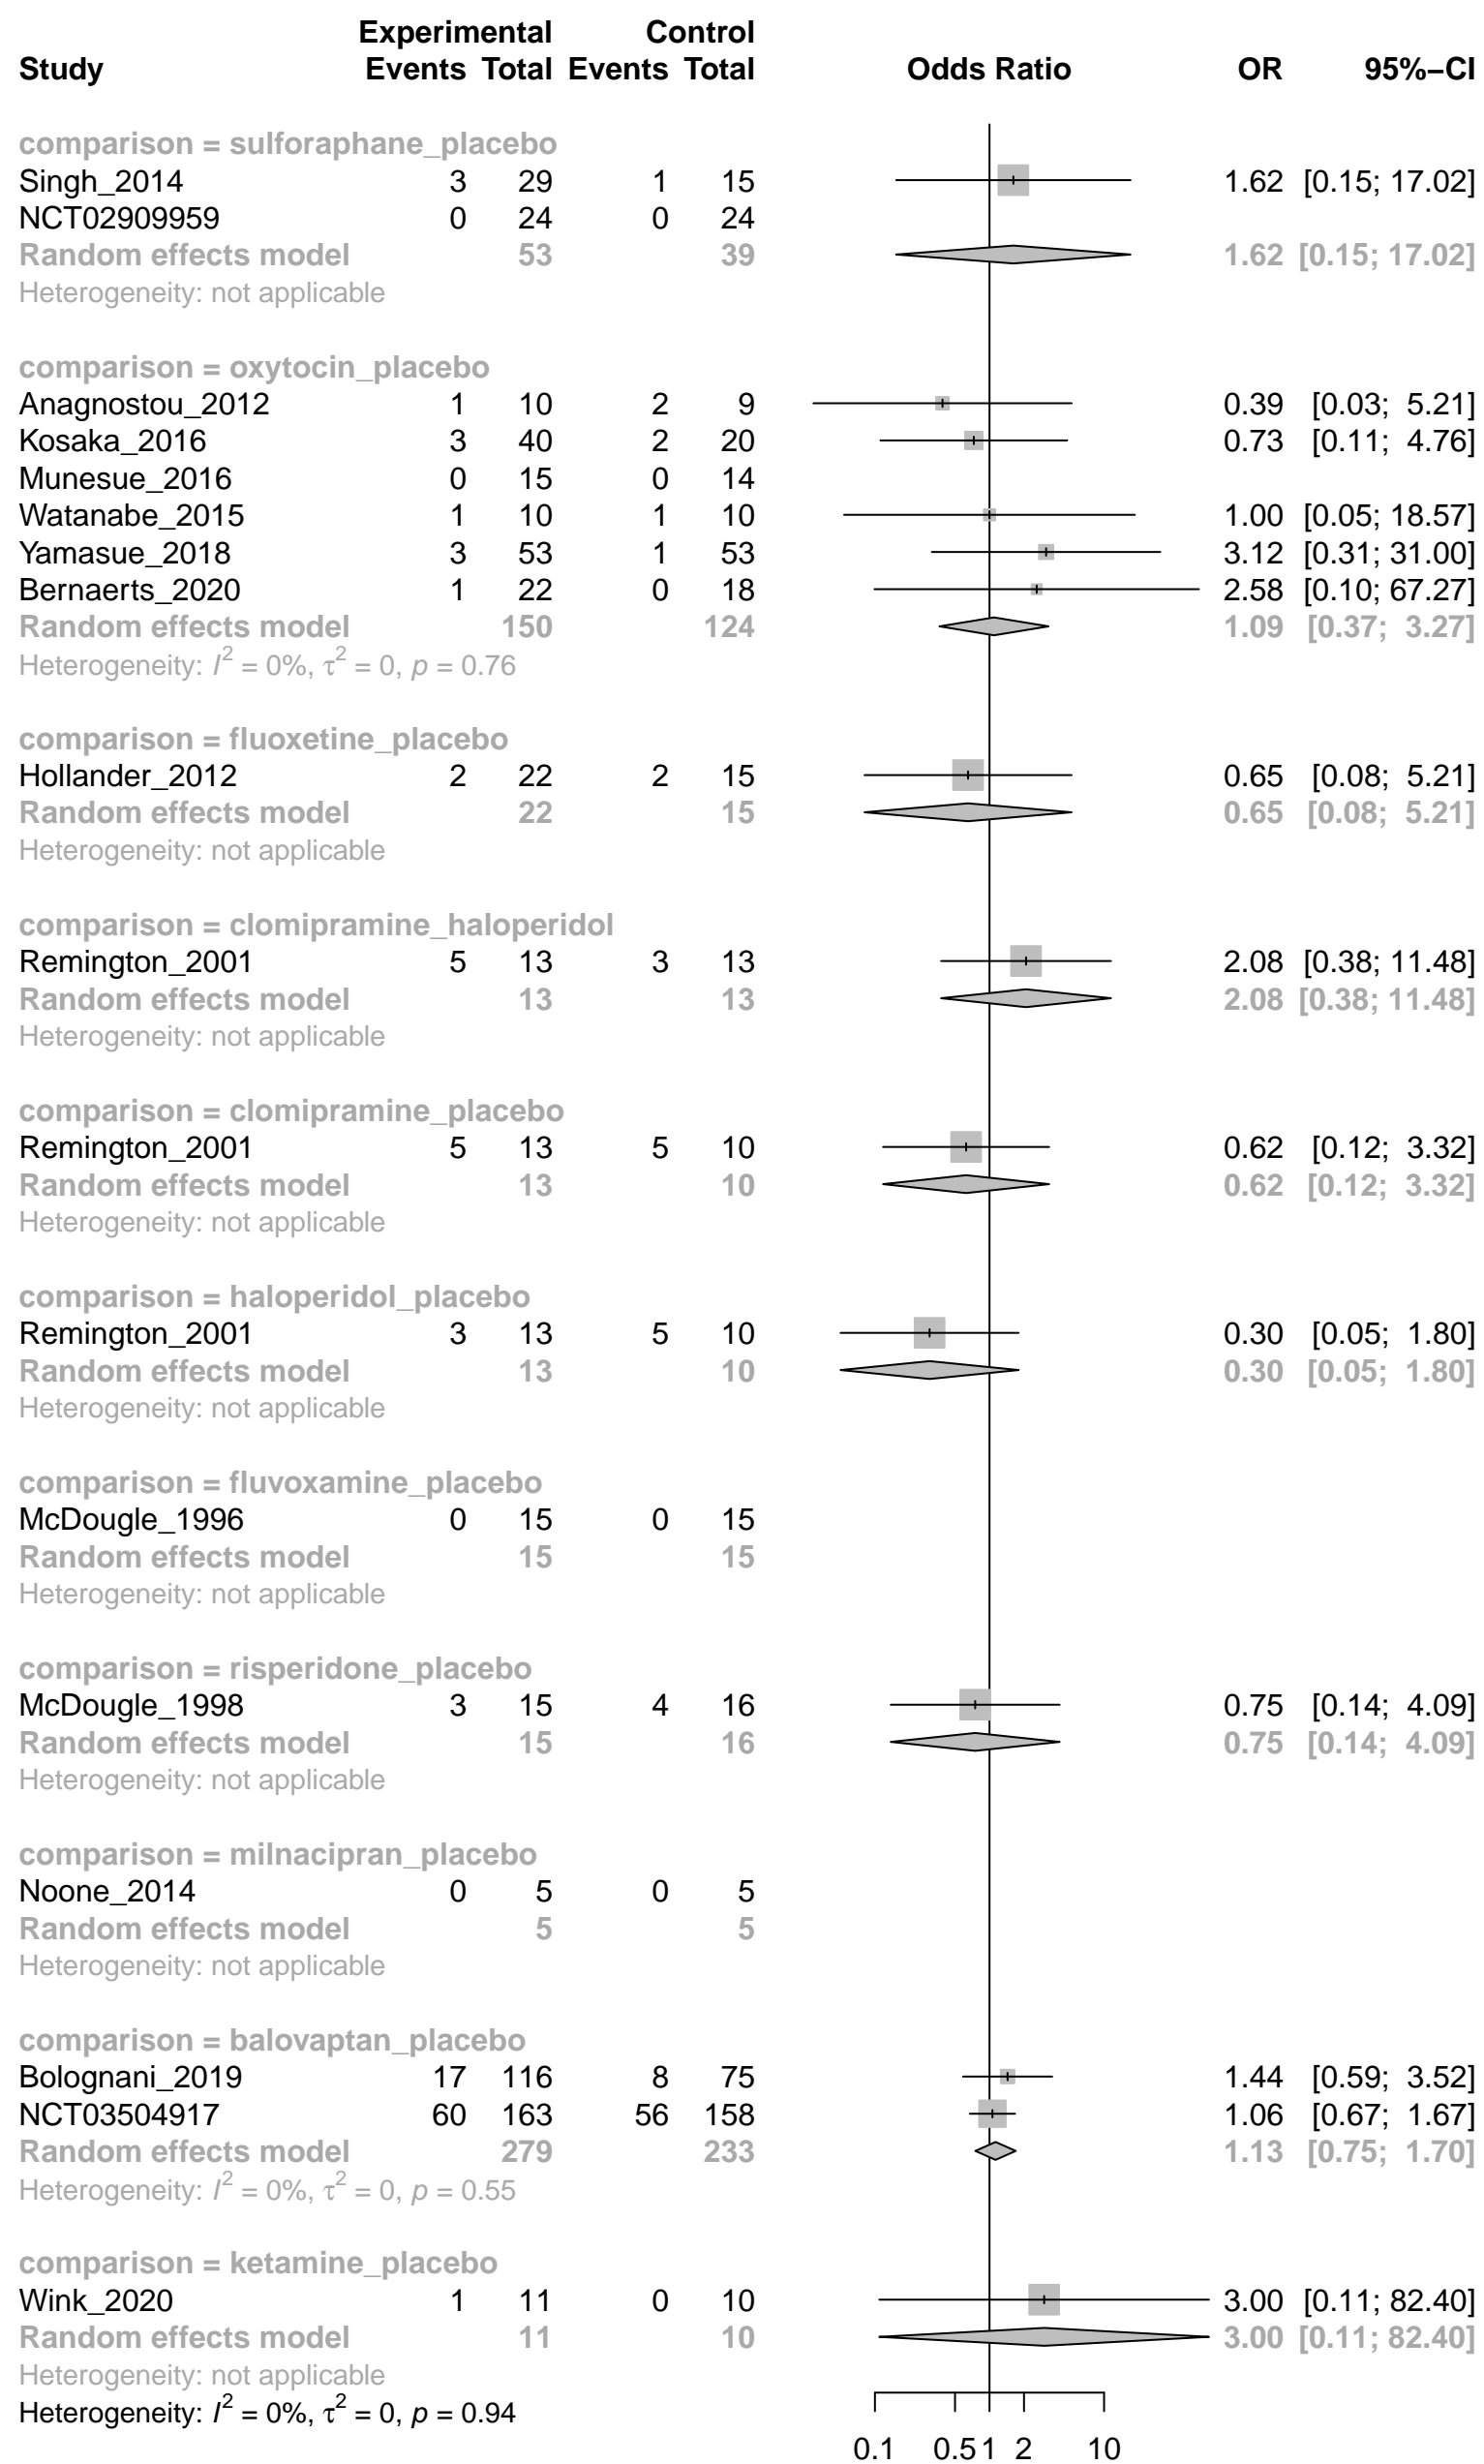



## Dropouts due to adverse events in adults

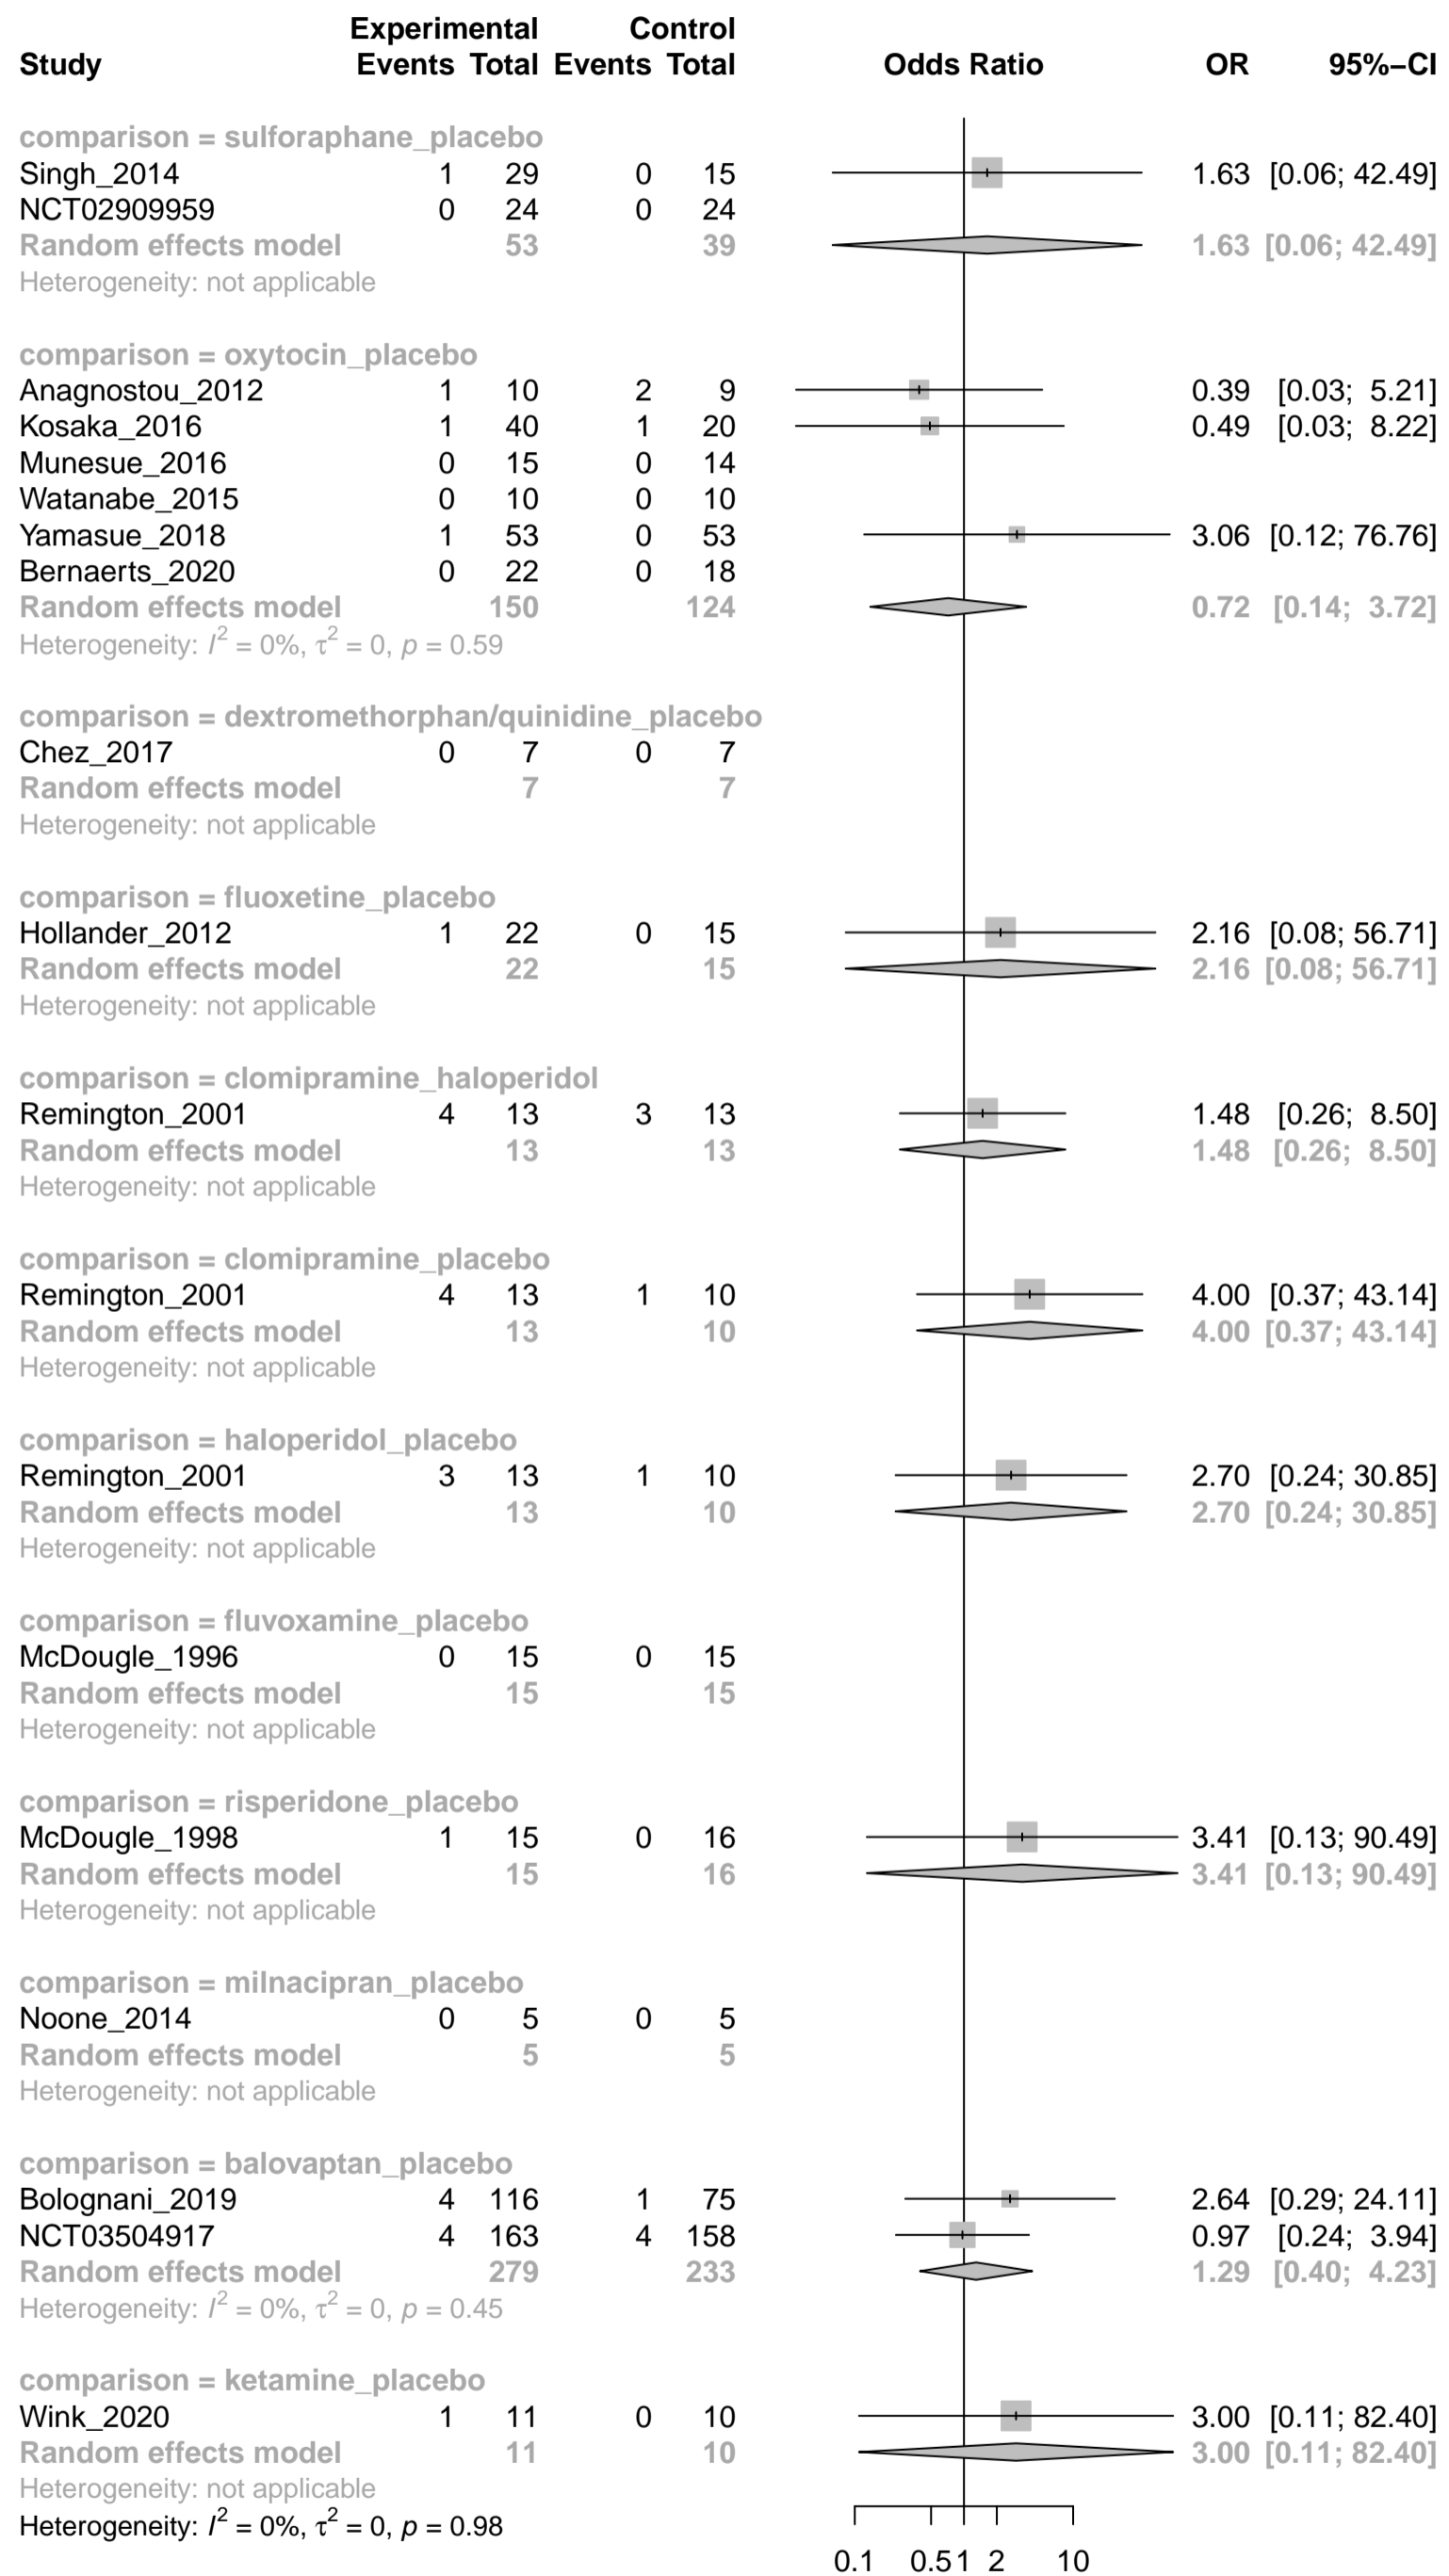

0.1 0.5 1 2 10



Any adverse events in children/adolescents

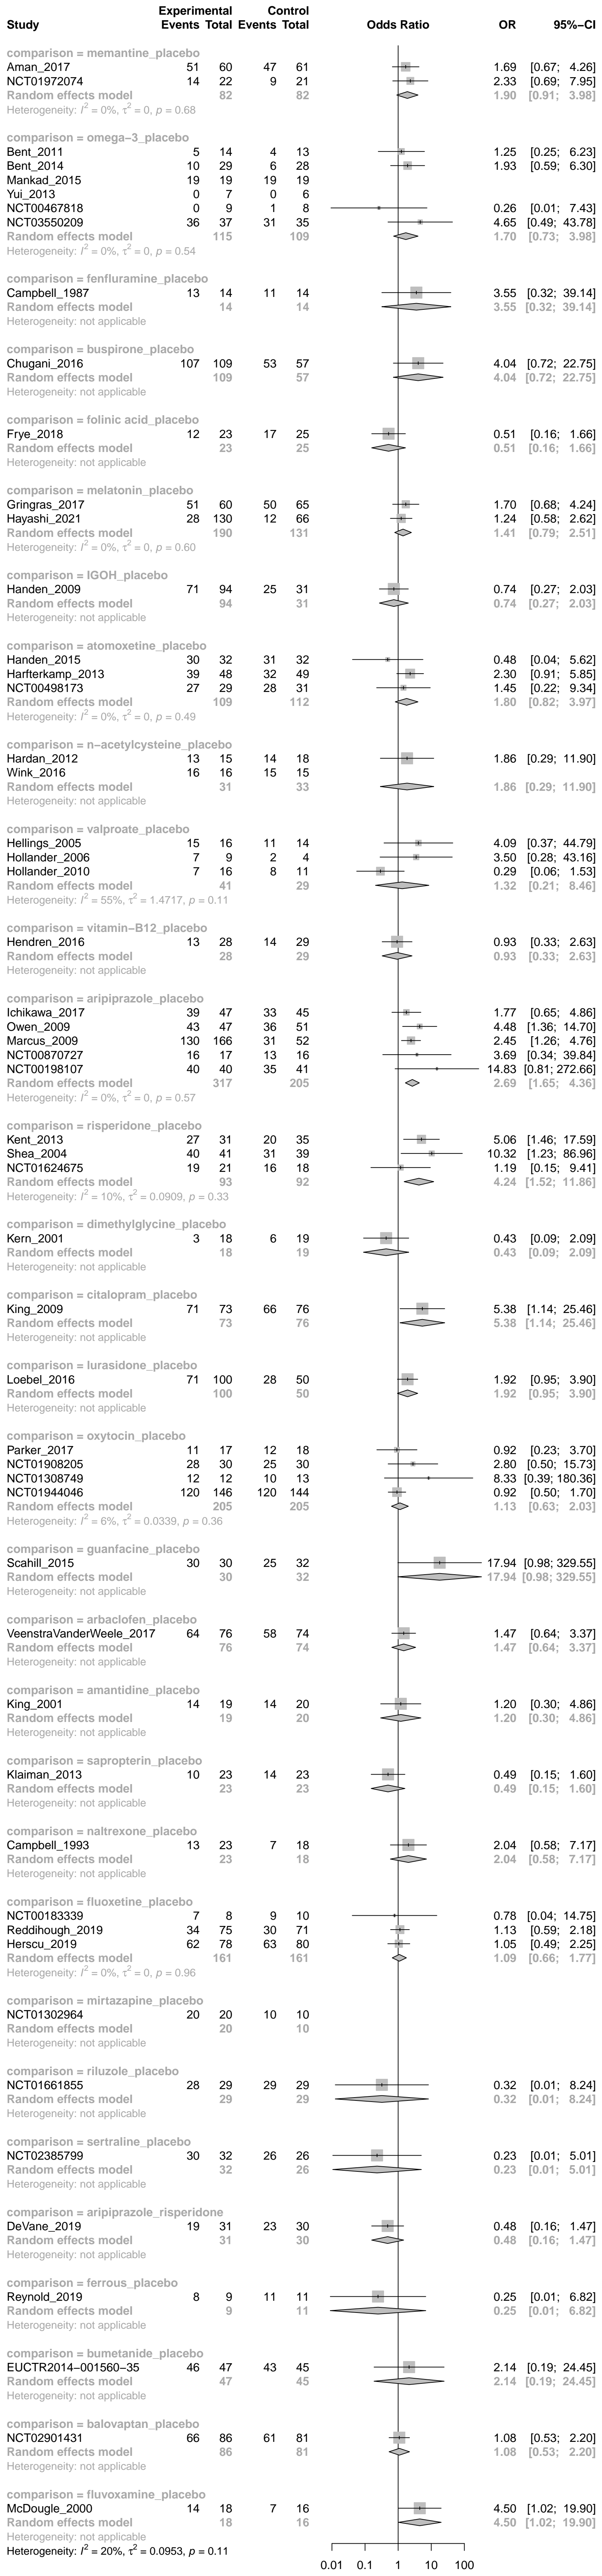

0.01 0.1 1 10 100

## Any adverse events in adults

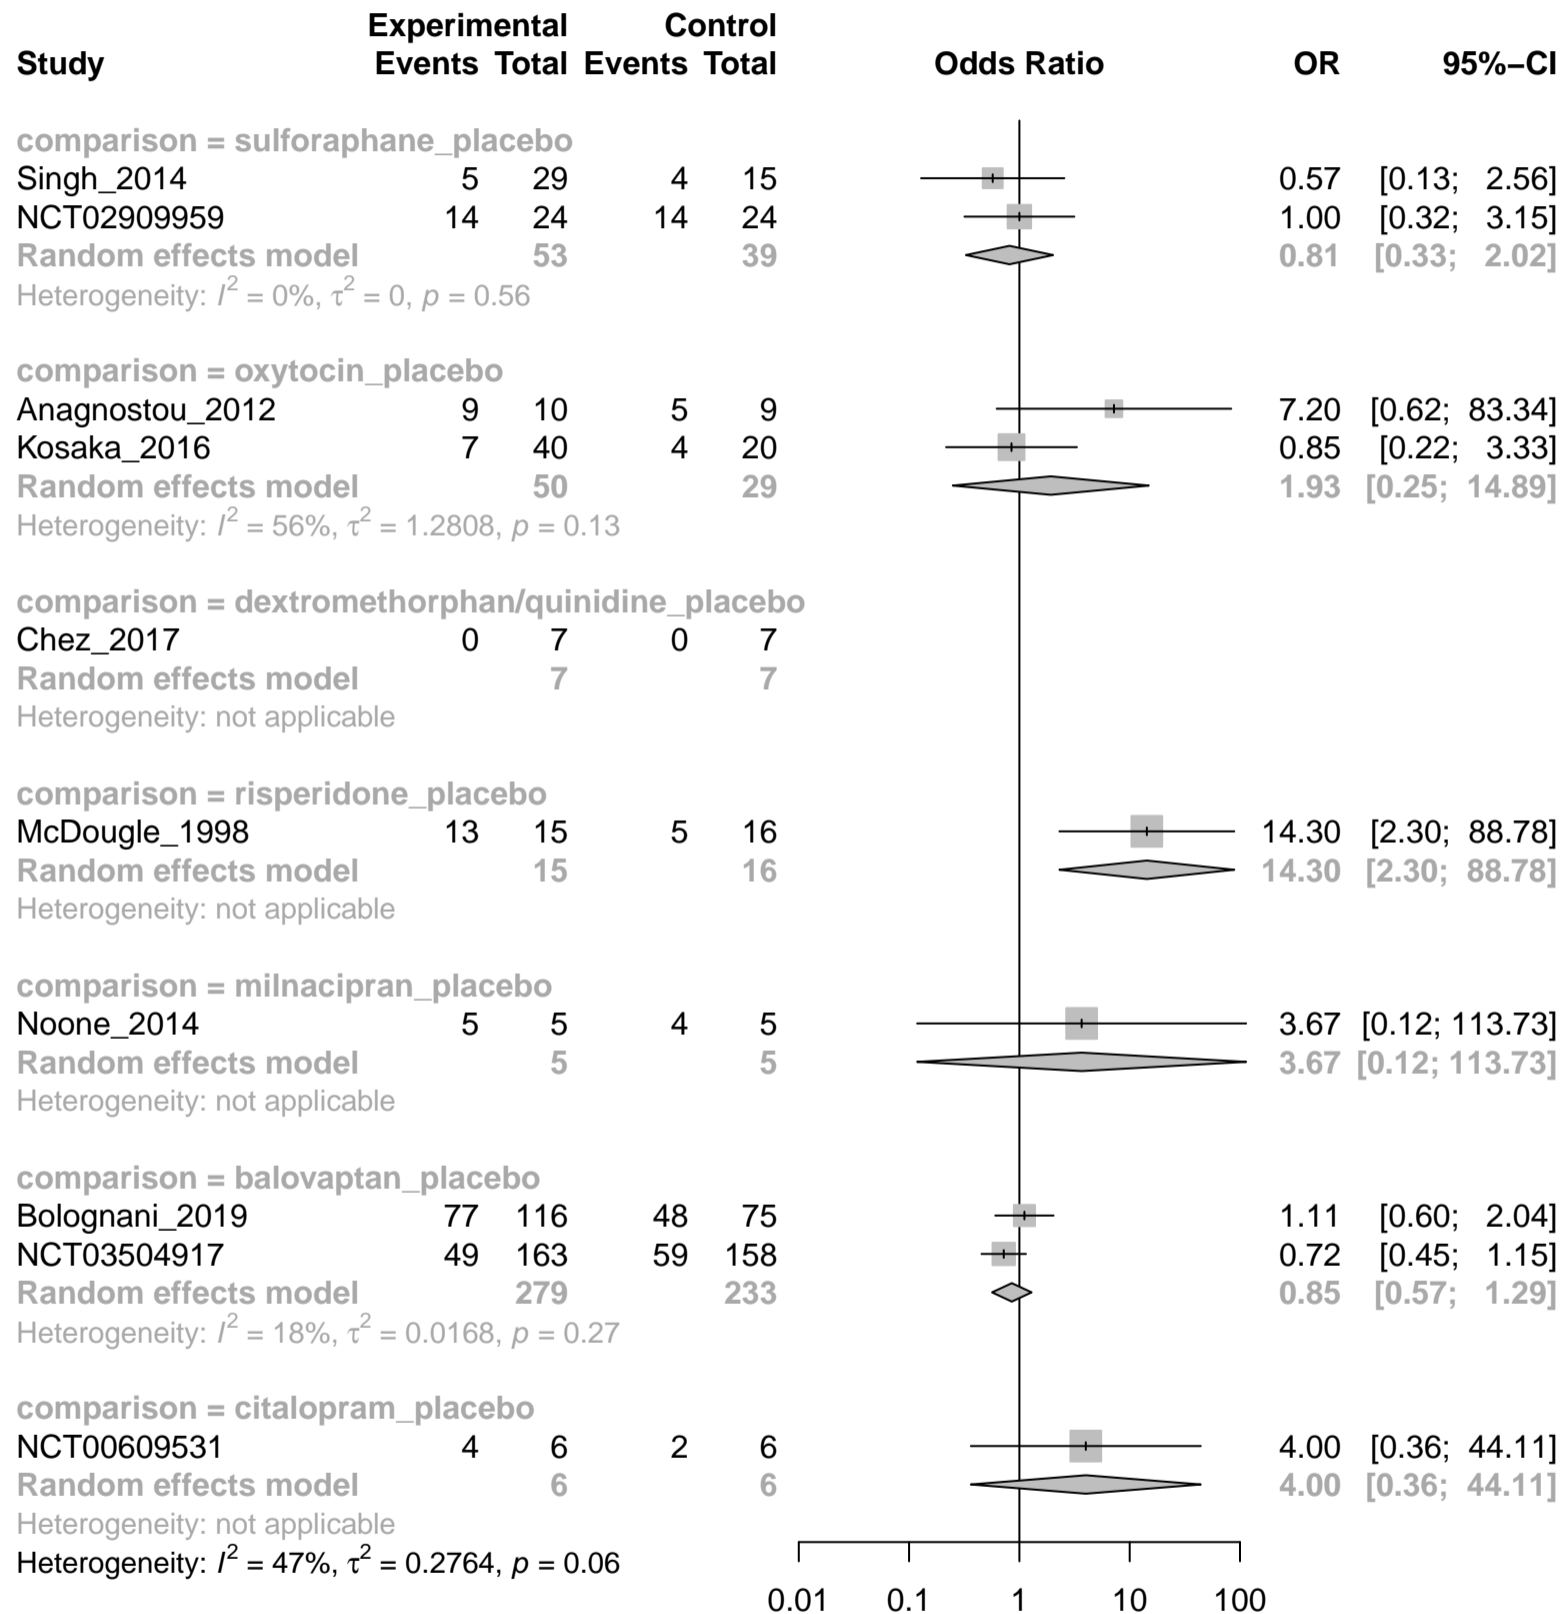

## Sedation in children/adolescents

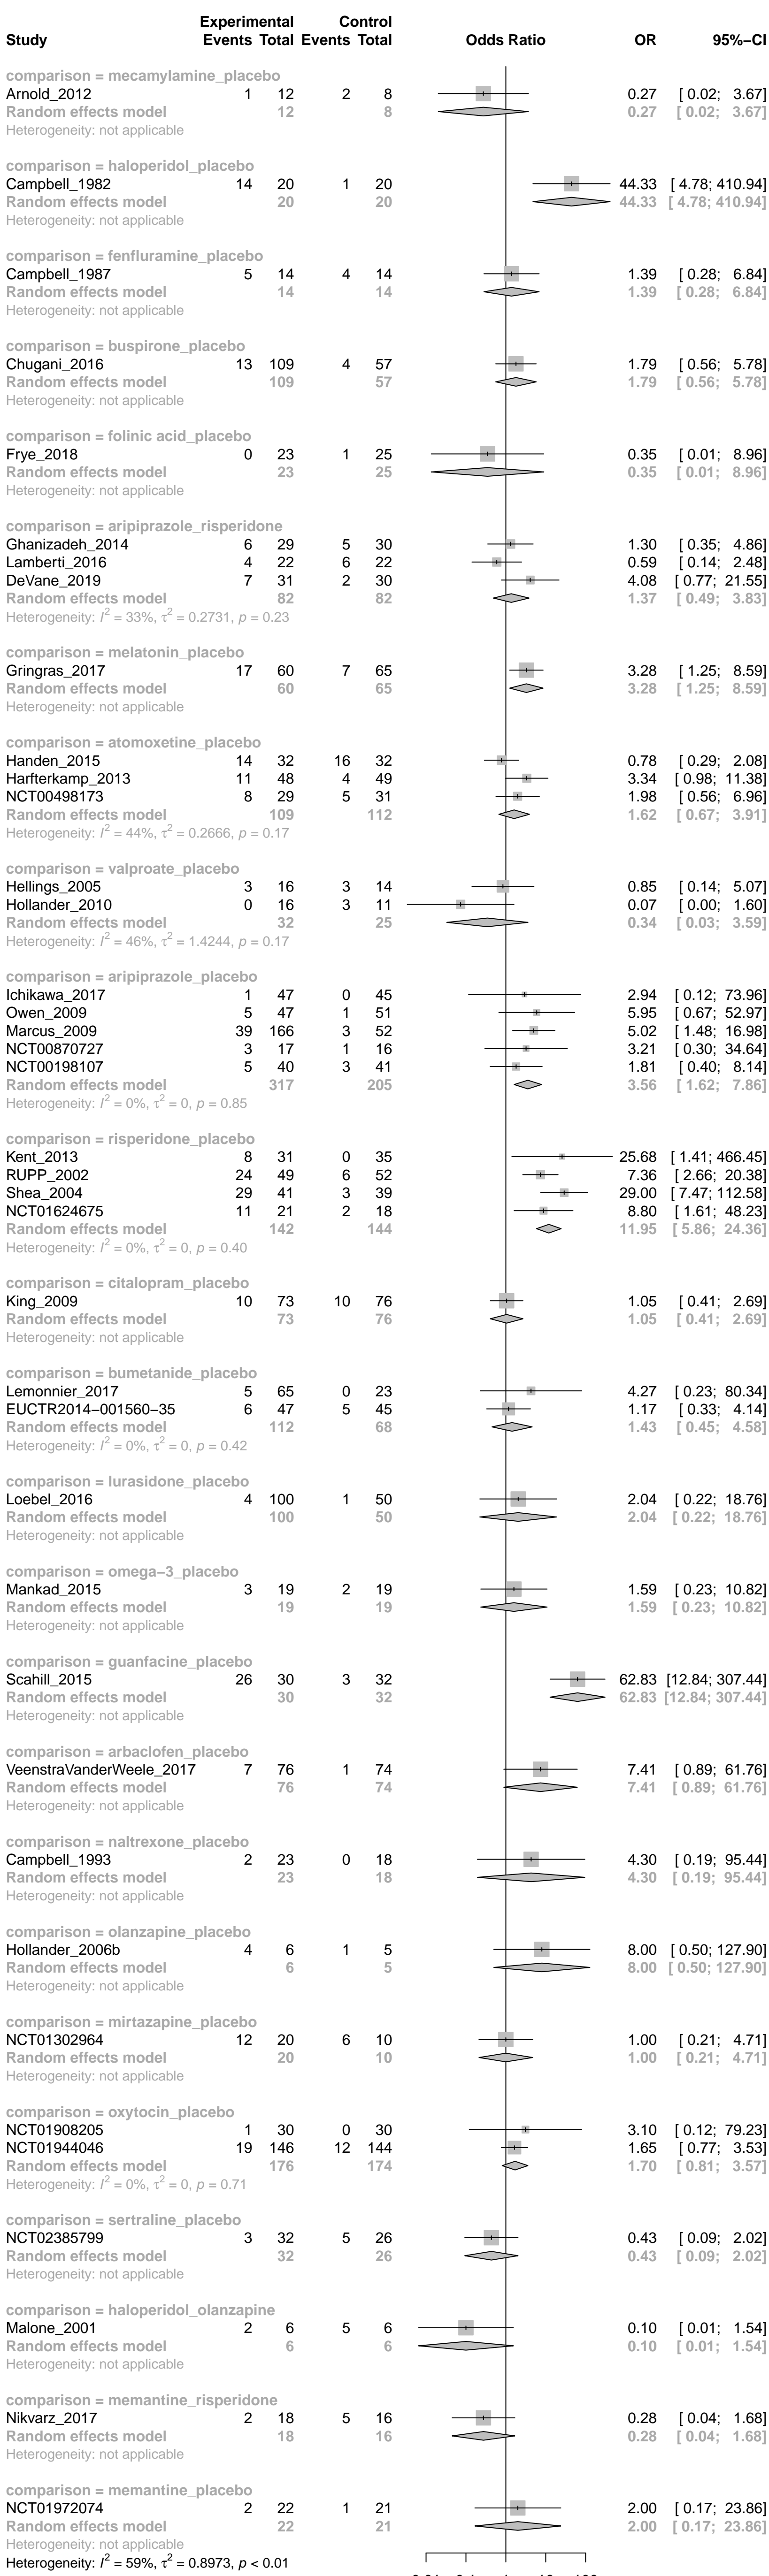

## Sedation in adults

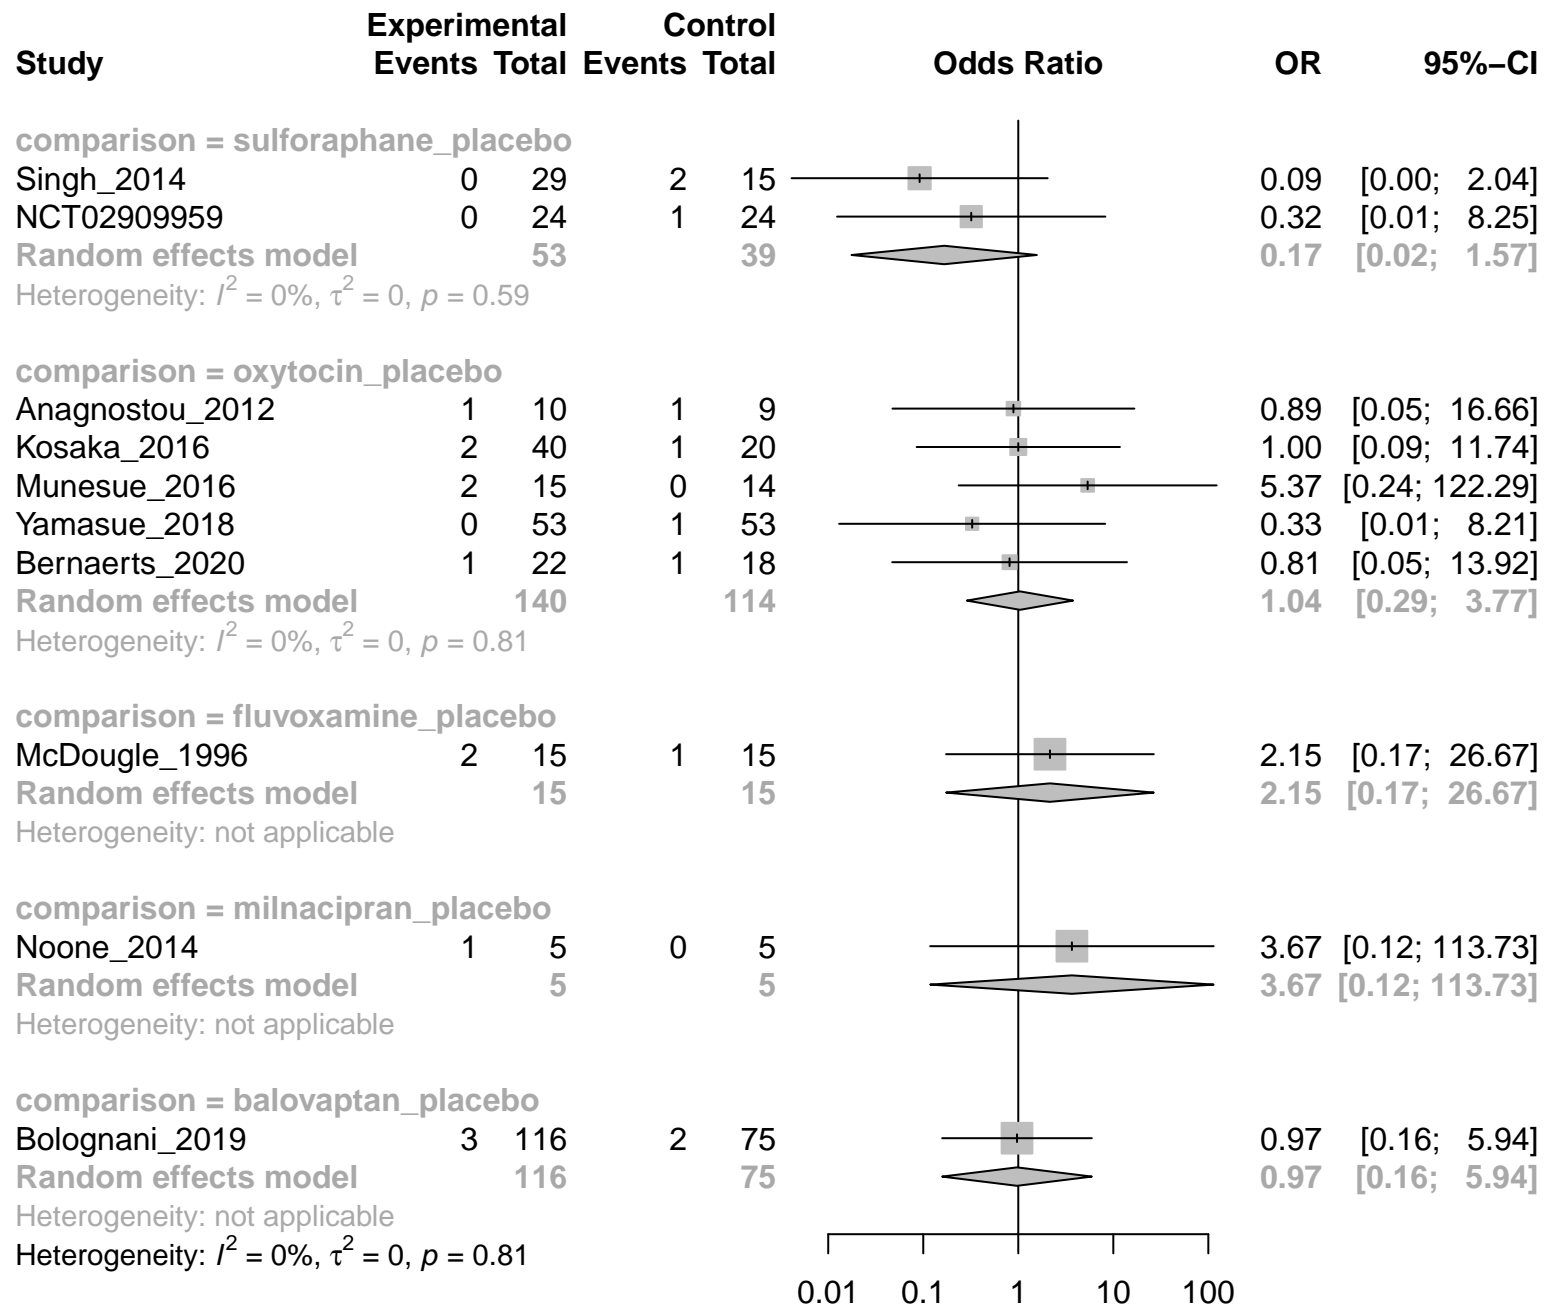

## Weight gain in children/adolescents

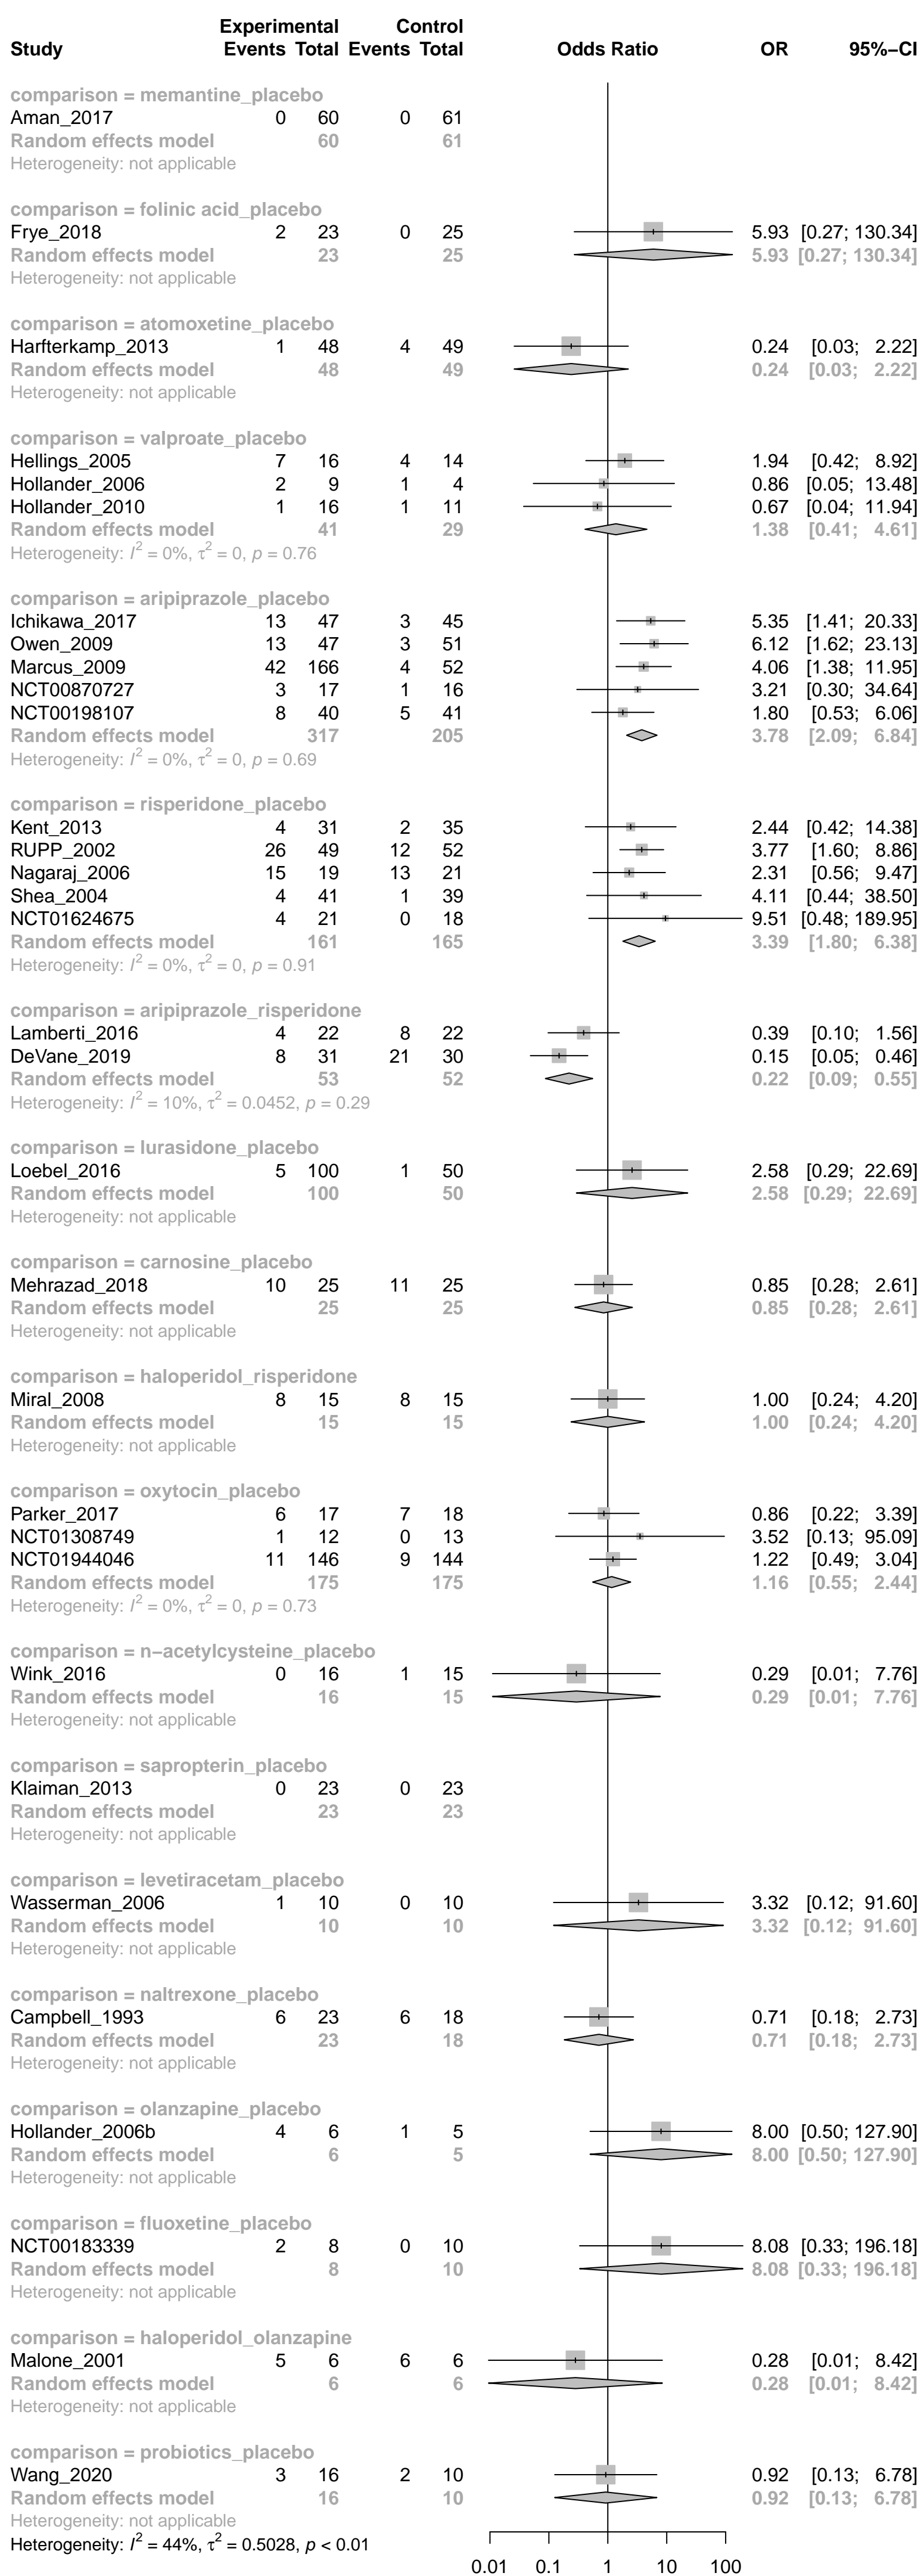

## Weight gain in adults

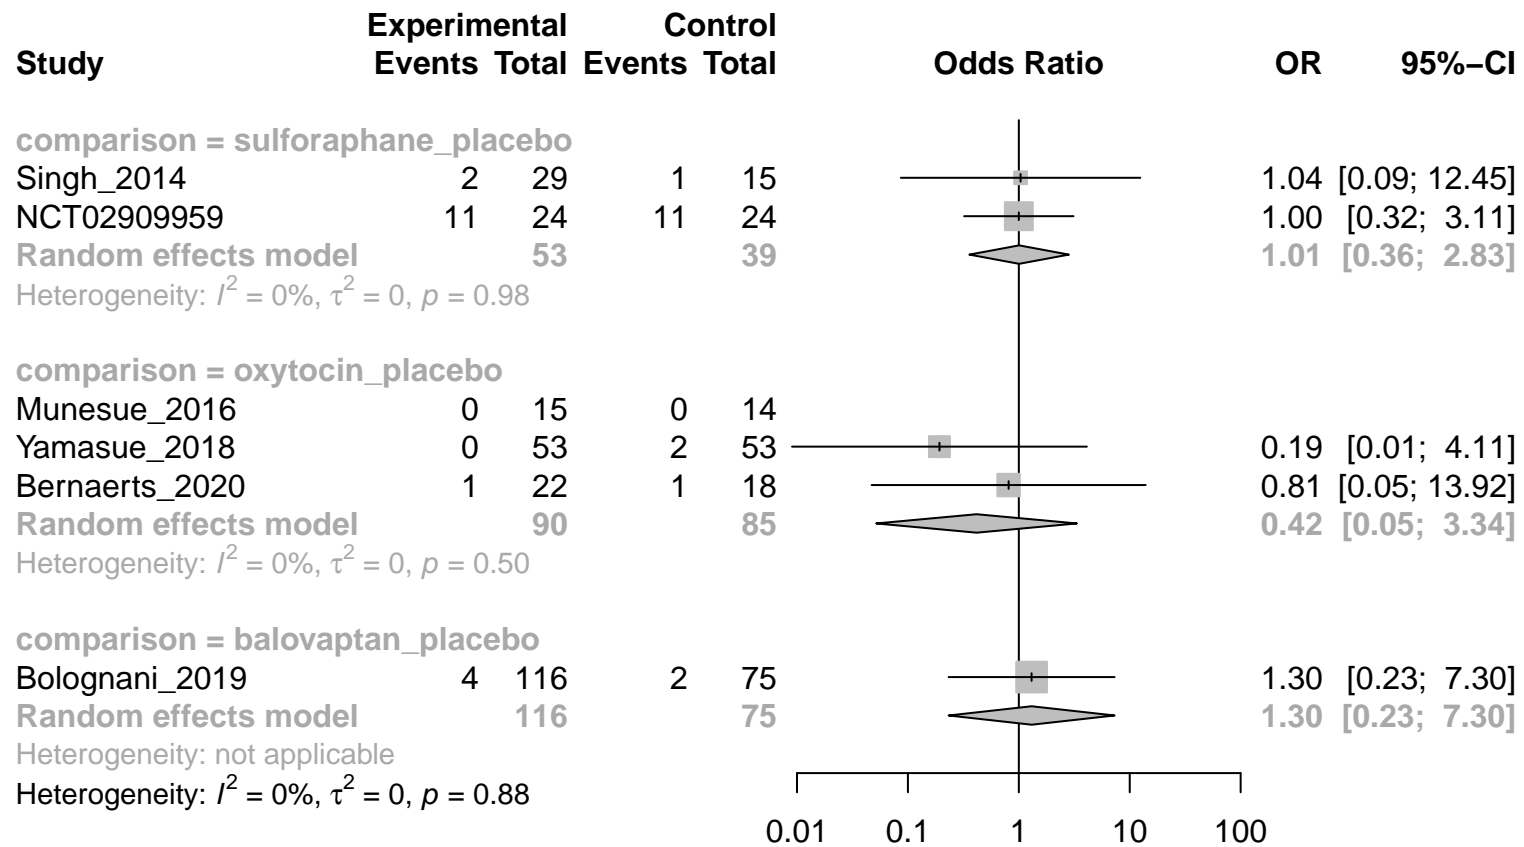

## Extrapyramidal symptoms in children/adolescents

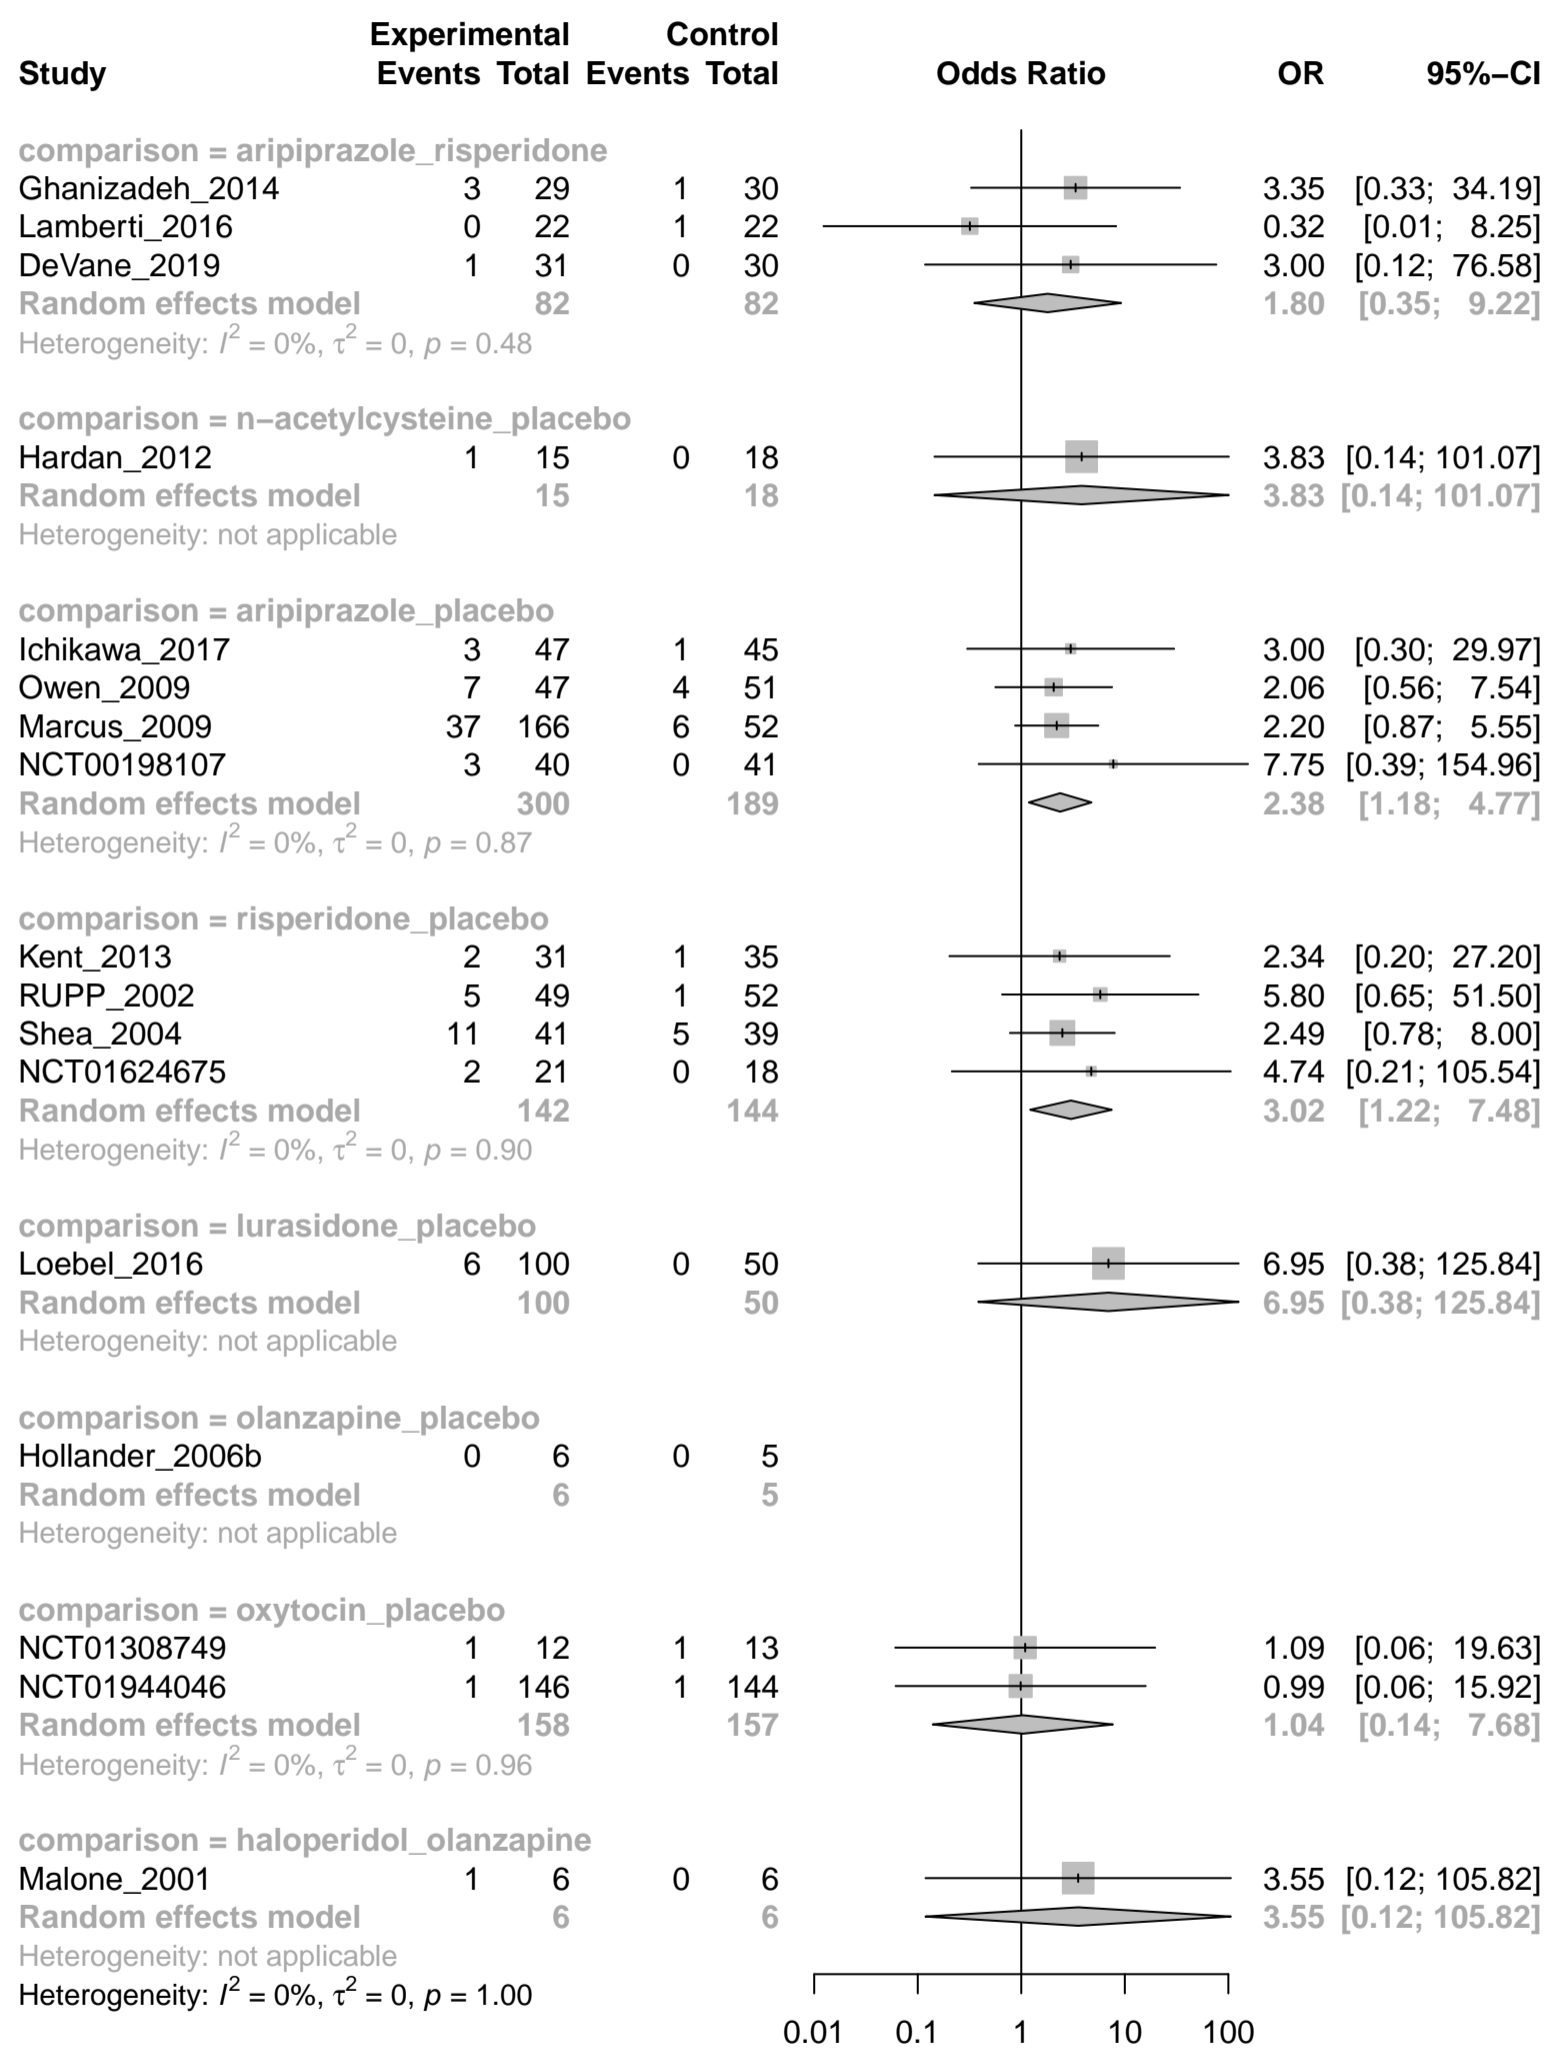

There were no data for extrapyramidal symptoms in adults
